# Supplementary material for: Digital health interventions for the management of mental health in people with chronic diseases: a rapid review
Source: PubMed Central journal article supplement — BMJ Open. 2021 Apr 5;11(4):e044437. doi: 10.1136/bmjopen-2020-044437 (PMC8030477; doi:10.1136/bmjopen-2020-044437), 2021-04-05
Supplement: bmjopen-2020-044437.draft_revisions.pdf [file bmjopen-2020-044437.draft_revisions.pdf]

# BMJ Open

BMJ Open is committed to open peer review. As part of this commitment we make the peer review history of every article we publish publicly available.

When an article is published we post the peer reviewers' comments and the authors' responses online. We also post the versions of the paper that were used during peer review. These are the versions that the peer review comments apply to.

The versions of the paper that follow are the versions that were submitted during the peer review process. They are not the versions of record or the final published versions. They should not be cited or distributed as the published version of this manuscript.

BMJ Open is an open access journal and the full, final, typeset and author-corrected version of record of the manuscript is available on our site with no access controls, subscription charges or pay-per-view fees (<http://bmjopen.bmj.com>).

If you have any questions on BMJ Open's open peer review process please email [info.bmjopen@bmj.com](mailto:info.bmjopen@bmj.com)

# BMJ Open

## Digital health interventions for the management of mental health in people with chronic diseases: a rapid review.

|                               |                                                                                                                                                                                                                                                                                                                                                                                                                                                                                                                                                                                                                                                                                                                                                                                                                                                                                                                                                                                                                         |
|-------------------------------|-------------------------------------------------------------------------------------------------------------------------------------------------------------------------------------------------------------------------------------------------------------------------------------------------------------------------------------------------------------------------------------------------------------------------------------------------------------------------------------------------------------------------------------------------------------------------------------------------------------------------------------------------------------------------------------------------------------------------------------------------------------------------------------------------------------------------------------------------------------------------------------------------------------------------------------------------------------------------------------------------------------------------|
| Journal:                      | <i>BMJ Open</i>                                                                                                                                                                                                                                                                                                                                                                                                                                                                                                                                                                                                                                                                                                                                                                                                                                                                                                                                                                                                         |
| Manuscript ID                 | bmjopen-2020-044437                                                                                                                                                                                                                                                                                                                                                                                                                                                                                                                                                                                                                                                                                                                                                                                                                                                                                                                                                                                                     |
| Article Type:                 | Original research                                                                                                                                                                                                                                                                                                                                                                                                                                                                                                                                                                                                                                                                                                                                                                                                                                                                                                                                                                                                       |
| Date Submitted by the Author: | 06-Sep-2020                                                                                                                                                                                                                                                                                                                                                                                                                                                                                                                                                                                                                                                                                                                                                                                                                                                                                                                                                                                                             |
| Complete List of Authors:     | Sasseville, Maxime; Université du Québec à Chicoutimi, Health Sciences; VITAM Research Center on Sustainable Health<br>LeBlanc, Annie; VITAM Research Center on Sustainable Health; Université Laval<br>Boucher, Mylène; VITAM Research Center on Sustainable Health<br>Dugas, Michèle ; VITAM Research Center on Sustainable Health<br>Mbemba, Gisele; VITAM Research Center on Sustainable Health<br>Tchunte, Jack; VITAM Research Center on Sustainable Health<br>Chouinard, Maud-Christine; Université de Montréal<br>Beaulieu, Marianne; Université Laval<br>Beaudet, Nicolas ; Omnimed; Université de Sherbrooke<br>Skidmore, Becky; Independent Information Specialist<br>Cholette, Pascale ; Centre intégré universitaire de santé et de services sociaux de la Capitale-Nationale du Québec<br>Aspiros, Christine; Patient partner<br>Larouche, Alain; Groupe Santé Concerto<br>Chabot, Guylaine; Groupe Santé Concerto<br>Gagnon, Marie-Pierre; Université Laval; VITAM Research Center on Sustainable Health |
| Keywords:                     | MENTAL HEALTH, Health informatics < BIOTECHNOLOGY & BIOINFORMATICS, GENERAL MEDICINE (see Internal Medicine)                                                                                                                                                                                                                                                                                                                                                                                                                                                                                                                                                                                                                                                                                                                                                                                                                                                                                                            |
|                               |                                                                                                                                                                                                                                                                                                                                                                                                                                                                                                                                                                                                                                                                                                                                                                                                                                                                                                                                                                                                                         |

SCHOLARONE™  
Manuscripts

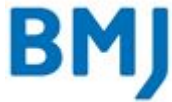

I, the Submitting Author has the right to grant and does grant on behalf of all authors of the Work (as defined in the below author licence), an exclusive licence and/or a non-exclusive licence for contributions from authors who are: i) UK Crown employees; ii) where BMJ has agreed a CC-BY licence shall apply, and/or iii) in accordance with the terms applicable for US Federal Government officers or employees acting as part of their official duties; on a worldwide, perpetual, irrevocable, royalty-free basis to BMJ Publishing Group Ltd ("BMJ") its licensees and where the relevant Journal is co-owned by BMJ to the co-owners of the Journal, to publish the Work in this journal and any other BMJ products and to exploit all rights, as set out in our [licence](#).

The Submitting Author accepts and understands that any supply made under these terms is made by BMJ to the Submitting Author unless you are acting as an employee on behalf of your employer or a postgraduate student of an affiliated institution which is paying any applicable article publishing charge ("APC") for Open Access articles. Where the Submitting Author wishes to make the Work available on an Open Access basis (and intends to pay the relevant APC), the terms of reuse of such Open Access shall be governed by a Creative Commons licence – details of these licences and which [Creative Commons](#) licence will apply to this Work are set out in our licence referred to above.

Other than as permitted in any relevant BMJ Author's Self Archiving Policies, I confirm this Work has not been accepted for publication elsewhere, is not being considered for publication elsewhere and does not duplicate material already published. I confirm all authors consent to publication of this Work and authorise the granting of this licence.

1  
2  
3 **Title: Digital health interventions for the management of mental health in people with**  
4 **chronic diseases: a rapid review.**  
5

6 Maxime Sasseville, RN, PhD, VITAM Research Center on Sustainable Health, Université du  
7 Québec à Chicoutimi, maxime1\_sasseville@uqac.ca

8 Annie LeBlanc, PhD, Université Laval; VITAM Research Center on Sustainable Health,  
9 annie.leblanc@fmed.ulaval.ca

10 Mylène Boucher, MSc, VITAM Research Center on Sustainable Health,  
11 Mylene.Boucher.ciusscn@ssss.gouv.qc.ca

12 Michèle Dugas, MSc, VITAM Research Center on Sustainable Health,  
13 michele.dugas.1@ulaval.ca

14 Mbemba Gisèle, PhD, Université Laval, gisele-irene-claudine.mbemba.1@ulaval.ca

15 Jack Tchunte, M.A, VITAM Research Center on Sustainable Health,  
16 jack.tchunte.ciusscn@ssss.gouv.qc.ca

17 Maud-Christine Chouinard, RN, PhD, Université de Montréal,  
18 maud.christine.chouinard@umontreal.ca

19 Marianne Beaulieu, PhD, Université Laval, Marianne.Beaulieu@fsi.ulaval.ca

20 Nicolas Beaudet, PhD, Université de Sherbrooke, Omnimed, nbeaudet@omnimed.com

21 Becky Skidmore, MLS, Independent Information Specialist, bskidmore@rogers.com

22 Pascale Cholette, MD, Centre Intégré Universitaire de Santé et de Services Sociaux de la  
23 Capitale Nationale, pascale.cholette@gmail.com

24 Christine Aspiros, B.A.A, Patient-Partner, christine.aspiros1@gmail.com

25 Alain Larouche, MD, Groupe Concerto, alarouche@groupeconcerto.com

26 Guylaine Chabot, Groupe Concerto, gchabot@groupeconcerto.com

27 Marie-Pierre Gagnon, PhD, Université Laval, VITAM Research Center on Sustainable  
28 Health, Marie-Pierre.Gagnon@fsi.ulaval.ca

29  
30  
31  
32  
33  
34 **Corresponding author contact e-mail:**

35 maxime1\_sasseville@uqac.ca

36 **Funding statement:** This review was funded by the Canadian Institute for Health Research in  
37 the Operating Grant: Knowledge Synthesis: COVID-19 in Mental Health & Substance Use  
38 (2020-05-04)

39 **Declaration of competing interests:** The authors have no conflict of interests to declare.  
40

41  
42 **Word count: 2315 words (2500 words MAX)**  
43

44 **Keywords:**

- 45 • Rapid review
- 46 • Chronic Diseases
- 47 • Digital health interventions
- 48 • Mental health
- 49
- 50
- 51
- 52
- 53
- 54
- 55
- 56
- 57
- 58
- 59
- 60

## ABSTRACT

**Objective:** Determine the effectiveness of digital mental health interventions for individuals with a concomitant chronic disease.

**Design:** We conducted a rapid review of systematic reviews. Two reviewers independently conducted study selection, and risk of bias evaluation. A standardized extraction form was used. Data is reported narratively.

**Interventions:** We included systematic reviews of digital health interventions aiming to prevent, detect or manage mental health problems in individuals with a pre-existing chronic disease, including chronic mental health illnesses, published in 2010 or after.

**Main outcome measure:** Reports on mental health outcomes (e.g.: anxiety symptoms, depression symptoms).

**Results:** We included 35 reviews, totalling 702 primary studies with a total sample of 50 692 participants. We structured the results in four population clusters: 1) chronic diseases; 2) cancer; 3) mental health; and 4) children and youth. For populations presenting a chronic disease or cancer, health provider-directed digital interventions (e.g., web-based consultation, internet cognitive behavior therapy) are effective and safe. Further analyses are required in order to provide stronger recommendations regarding relevance for specific population (such as children and youth). Web-based interventions and e-mail were the mode of administration that had the most reports of improvement. Virtual reality, smart-phone applications and patient portal had limited reports of improvement.

**Conclusions:** Digital technologies could be used to prevent and manage mental health problems in people living with chronic conditions, with consideration for the age group and type of technology used.

### Strengths and limitation of this study

- We conducted a rapid review of systematic reviews published in the last 10 years, including a large body of evidence in four clusters of population.
- A panel of knowledge users were involved in each step of the review, from conceptualization to publication to ensure relevance in clinical context and policy making.
- Study selection and bias evaluation were completed by two independent reviewers and data extraction used a standardized form.
- We limited the search to the most relevant databases and the last 10 years.
- The overlapping of primary studies was not evaluated.

## INTRODUCTION

Chronic diseases are the main burden on healthcare systems in developed countries and account for almost 70% of deaths worldwide(1). An individual with a chronic condition is two to three times more likely to present a concomitant mental health problem than the general population (2). As the number of physical chronic conditions increase in a population, so do the mental health ones. The co-occurrence of chronic and mental health conditions leads to an increase in total healthcare costs and services utilization, as well as poorer quality of life and health outcomes for these individuals (3, 4)..

The psychosocial consequences of the current COVID-19 pandemic are alarming and will persist long after the pandemic is over (5). In the current COVID-19 pandemic context, efforts have been invested to rapidly produce scientific evidence in mental health for adapting the clinical setting and supporting policy making (e.g., confinement measures). Adapting to telehealth, when in-person consultation is not recommended, requires efficient and relevant digital mental health interventions for the population with concomitant chronic diseases and mental health issues. While a large number of interventions using digital technologies have been evaluated for the management of depression or anxiety (6, 7), the relevance of these interventions for people living with chronic diseases remains to be defined.

This rapid review of systematic reviews aimed to determine effectiveness of digital mental health interventions aiming to prevent, detect or manage mental health problems in individuals with a pre-existing chronic condition.

## METHODS

We conducted a rapid review following the guidance from the Cochrane Rapid Reviews Methods Group (8). We report our results based on the Preferred Reporting Items for Systematic Reviews and Meta-Analyses (PRISMA) Statement (9). The protocol for this rapid review was registered in the National Collaborating Centre for Methods and Tools (NCCMT) COVID-19 Rapid Evidence Service (ID 75).

### Knowledge Users Engagement

We engaged a panel of knowledge users (patients, clinicians, decision makers), content experts, review methodologists, and researchers throughout the review process, from question development, literature search, data extraction and analysis, interpretation and writing of results, and dissemination of findings.

### Eligibility Criteria

We followed the PICO Framework in establishing eligibility criteria (10) (Table 1). We considered any review that included digital health interventions aiming to prevent, detect or manage mental health problems in individuals with a pre-existing chronic disease, including chronic mental health diseases, published in 2010 or after. There were no language restriction.

### Literature Search

An experienced medical information specialist developed and tested the search strategies through an iterative process in consultation with the review team and knowledge users. Using the OVID platform, we searched Ovid MEDLINE®, including Epub Ahead of Print and In-Process & Other Non-Indexed Citations, Embase Classic+Embase, Cochrane Database of

1  
2  
3  
4  
5  
6  
7  
8  
9  
10  
11  
12  
13  
14  
15  
16  
17  
18  
19  
20  
21  
22  
23  
24  
25  
26  
27  
28  
29  
30  
31  
32  
33  
34  
35  
36  
37  
38  
39  
40  
41  
42  
43  
44  
45  
46  
47  
48  
49  
50  
51  
52  
53  
54  
55  
56  
57  
58  
59  
60

Systematic Reviews, Database of Abstracts of Reviews of Effects and the Health Technology Assessment Database. We also searched CINAHL (EBSCO) and Web of Science. All searches were performed on June 11, 2020. We used a combination of controlled vocabulary (e.g., “Chronic Disease”, “Mood Disorders”, “Internet”) and keywords (e.g., “cancer”, “anxiety”, “telehealth”), and adjusted vocabulary and syntax across the databases. We applied a systematic review filter to all searches except for the Cochrane databases, where it is not required. Specific details regarding the strategies appear in additional file 1.

### **Study Selection, Data Extraction, and Synthesis**

Six reviewers individually performed screening for titles, abstracts and then full text using a standardized form pilot-tested by all reviewers on 25 citations. All citations were reviewed by two reviewers independently at the first level of screening. We developed a standardized extraction form that included study characteristics (e.g., authors, country, design), intervention characteristics (e.g., type of digital intervention), and outcomes reported. A senior reviewer reviewed all full-text citations for inclusion. Single reviewers extracted data which were then confirmed by a senior reviewer. We resolved discrepancies through discussion. We report data using a narrative approach which includes tables of study characteristics, intervention characteristics, and mental health outcomes.

### **Critical Appraisal**

We used the AMSTAR 2 tool to critically appraise each included review (11). This revised version of the AMSTAR tool was developed for the evaluation of systematic reviews that include randomised or non-randomised studies of healthcare interventions. This tool has good inter-rater reliability, is widely used for healthcare research, and uses a four-level rating of overall confidence. A single reviewer rated the critical appraisal tool and all judgements were verified by a second author (11).

## **RESULTS**

### **Characteristics of Included Reviews**

Our search strategy identified 2320 individual citation. Following screening of titles and abstracts, we excluded 2153 records. We excluded an additional 132 citations during full-text screening, resulting in a total of 35 citations included in our review (Figure 1)(12-46).Of these reviews, there were 17 systematic reviews, 17 systematic reviews with meta-analysis and one integrative review, totalizing 702 primary studies with a total sample of 50,692 participants.

Most reviews described digital interventions performed in a specialized care setting (42%) and targeted an adult population (83%). They were looking at interventions to manage and treat a mental health problem (60%), testing web-based and internet interventions (32%) by comparing them to usual care (48%), for people affected with cancer or various chronic diseases (77%). We present the complete description of included reviews in Table 2.

The overall confidence ratings of the AMSTAR 2 tool were mostly high or moderate (31/35) with a limited number of low ratings (4/35) and no critically low rating (Table 3). A small percentage of the AMSTAR 2 items were not reported in the included reviews with the exception of the source of funding of primary studies in the included reviews (0%) (Figure 2).

We structured our synthesis according to four population clusters: 1) chronic diseases; 2) cancer; 3) mental health; and 4) children and youth. The mental health outcomes found in the included reviews were mainly depression and anxiety symptoms, assessed through



heterogeneous outcomes measures. The results are further presented by type of reporting (quantitative or narrative).

### **Chronic Diseases Cluster**

We identified 13 reviews referring to people with various chronic diseases (Table 2). Six of the 13 reviews reported their results using pooled difference of score mean (16, 19, 23, 36, 42, 43). The majority of the reviews presenting quantitative results reported improvement of depressive symptoms (5/6), but only one identified improvement in anxiety symptoms (1/3). One review reported improvement of general distress(42). The synthesis with the largest effect size included 108 primary studies with only web-based and internet cognitive behavior therapy (CBT) interventions(23). Most of the reviews that yielded narrative results reported improvement of depressive symptoms (6/7), improvement in anxiety symptoms (6/7) and psychosocial outcomes (1/1). Only one report of inferior effectiveness was identified for both depression and anxiety symptoms(18). Narrative reports described a small to moderate effect size within group in depression and anxiety symptoms. One integrative review report based on qualitative data described that digital health interventions for people with chronic diseases promoted active acceptance of their disease, improved the awareness of physical manifestations of the disease, helped identify signs and symptoms of worsening and improved management of acute events(18). The types of digital technology that had the most reports of improvements were web-based interventions, followed by e-mail. Virtual reality and patient portal had no reports of improvements on outcomes when used (Table 4).

### **Cancer Cluster**

We identified 14 reviews referring to people with cancer (Table 2). Quantitative reporting was present in six reviews (17, 24, 25, 30, 44, 46). Four (4/6) of those reported improvements of depressive symptoms, and half showed improvements in anxiety symptoms (3/6). Other quantitative reports of improvements in mental health outcomes included distress and quality of life. The quantitative report with the largest effect size included 20 primary studies, a total sample of 2190 participants, and looked at web-based and teleconsultations CBT interventions(17). Reviews that yielded narrative results reported improvements of depression symptoms (6/7), anxiety symptoms (5/5), distress (3/3), quality of life (1/1) and mood regulation (1/1). Pooling of the results was impossible in one review due to heterogeneity(12). The narrative outcome reports described a small effect size within group for depression and anxiety symptoms (21). The types of digital intervention that had the most reports of improvements were web-based interventions and e-mail. Virtual reality had no reports of improvements (Table 4)

### **Children and Youth Cluster**

We identified four reviews related to digital health interventions targeting children and youth (Table 2). Two reviews reported a quantitative synthesis presenting mixed effects; one showing within group improvements in depression and anxiety, and both showing no between group difference on these outcomes (20, 39). As for narrative syntheses, both reported improvements on depression and anxiety, with one of the reviews reporting on post-traumatic stress disorder (PTSD) symptoms improvement (28, 32). The limited reports on improvement for this population was associated with the used of web-based interventions (3/4), Smart phone applications (2/4) and virtual reality (1/4) (Table 4).

### **Mental Health Cluster**

We identified four reviews related to population with mental health problems (Table 2). The quantitative reports showed improvements in anxiety symptoms for generalized anxiety



1  
2  
3 disorder and disease-specific anxiety (3/3), improvements of depression symptoms (1/1) and  
4 PTSD symptoms (1/1). The only narrative report for that cluster showed no improvement on  
5 PTSD symptoms between groups (45). The types of digital technology that had the most  
6 reports of improvement were web-based interventions (3/4) and e-mail (2/4) with unique  
7 reports for smart phone applications, text-messages and online chat (table 4).  
8  
9

## 10 **DISCUSSION**

11 We conducted a rapid review of systematic reviews to identify digital health interventions  
12 effective to prevent, detect or manage mental health problems in individuals with a pre-  
13 existing chronic disease. In total, 35 reviews were included.  
14  
15

16 Our findings are in line with the extensive evidence that internet CBT interventions are  
17 effective and comparable to face-to-face interventions (47). Our analysis adds to the body of  
18 evidence on effectiveness regarding concomitant chronic diseases in four clusters of  
19 population. For people with various chronic diseases, most of the included reviews showed  
20 that digital health interventions have a positive effect on depression, anxiety, distress and  
21 psychosocial outcomes. The data showed that interventions have a moderate effect size  
22 within the intervention group and a small effect size when compared to usual care. For the  
23 cluster of population affected by cancer (including survival), evidence already exists  
24 regarding the effectiveness of digital mental health interventions with positive to mixed effect  
25 (48). Our data also showed that digital health interventions are effective in improving  
26 depression, anxiety, distress, quality of life and mood regulation, and teleconsultation and  
27 web-based interventions were the most effective modes of delivery for this population.  
28 Regarding the pediatric population, a meta-review targeting digital mental health  
29 interventions for children and youth reported a positive effect for the use of web-based CBT  
30 but only in children and youth with anxiety and depression with no other concomitant  
31 conditions (49). Quantitative data were inconclusive regarding effectiveness and effect size  
32 within group but showed a non-inferiority when compared to usual care. All included reviews  
33 in this population combined smart phone applications and web-based interventions, making it  
34 difficult to draw any conclusion about the most effective mode of delivery for the  
35 intervention at this level of analysis. For the mental health population, the included reviews  
36 emphasized that digital health interventions are effective for individuals with a combination  
37 of physical and mental conditions, as well as for people with multiple mental health  
38 problems.  
39  
40  
41  
42

43 Available evidence suggests that digital health interventions such as web-based CBT, e-mail  
44 messaging and teleconsultation could be effective and provide an alternative to face-to-face  
45 psychological interventions to prevent and manage mental health problems in people affected  
46 by cancer or other chronic diseases. In line with our findings, Torous et al. described that  
47 offering health provider-directed synchronous digital health solutions such as teleconsultation  
48 is the first step to increase access to quality mental health care in the midst of the COVID-19  
49 pandemic (50). Many of these innovations support the care of people in need of special  
50 attention, including those with chronic illnesses. Due to smaller effect size, we were not able  
51 to draw any conclusion related to the other forms of digital health interventions such as  
52 online chat, text message and smart phone applications. These types of digital health  
53 interventions are asynchronous; they may improve access and promote low-threshold  
54 alternatives to mental health consultations within the health care system. However, More  
55 evidence regarding implementation and evaluation to be safe for patients would be required  
56 (50). Included reviews that looked at other intervention delivery methods reported smaller to  
57 no effect, but it could be related to heterogeneity of the data.  
58  
59  
60

1  
2  
3  
4 This rapid review of reviews has limitations. In order to respect the requirements of this  
5 urgent strategic call in response to the COVID-19 pandemic and provide stakeholders and  
6 decision makers with up-to-date evidence, we limited the search to the most relevant  
7 databases and the last 10 years. Despite our best efforts, we may have missed some  
8 publications. Moreover, we did not assess the overlapping of primary studies in the included  
9 reviews. While we rigorously followed guidance for the conduct of rapid reviews, results  
10 from this study should be interpreted with caution. Further analyses will be required for  
11 stronger recommendations, notably by considering the potential publication bias, as well as  
12 other factors that could decrease the level of confidence in the reported effects.  
13  
14

## 15 16 **CONCLUSION**

17 This rapid review outlines the current evidence regarding the use of digital health  
18 interventions for people with a concomitant chronic disease. For individuals with a chronic  
19 disease or cancer, health provider-directed digital interventions (e.g., teleconsultation) are  
20 effective and safe. However, further analyses of this large body of evidence are required in  
21 order to provide precise recommendations regarding relevance for specific populations (such  
22 as children and youth), modes of delivery and type of intervention. In response to the current  
23 crisis, but also to better prepare for the post-crisis and future crises, digital technologies could  
24 be used to prevent and manage mental health problems in people living with chronic  
25 conditions, with consideration for the age group and type of technology used.  
26  
27

## 28 29 **ACKNOWLEDGEMENTS**

30 The authors would like to thank the knowledge users for their support throughout this review  
31 and the SPOR Evidence Alliance for their support.  
32

## 33 34 **PATIENT AND PUBLIC INVOLVEMENT STATEMENT**

35 A panel of knowledge users (patients and clinicians) was involved throughout the research  
36 process, from funding acquisition to publication. The panel will also be involved in  
37 subsequent dissemination activities.  
38

39 **AUTHOR STATEMENT:** Maxime Sasseville, Annie LeBlanc, Marie-Pierre Gagnon,  
40 Maud-Christine Chouinard, Marianne Beaulieu, Nicolas Beaudet, Pascale Cholette Christine  
41 Aspiros, Alain Larouche, Guylaine Chabot identified the need for this study and contributed  
42 to its conception and design. Maxime Sasseville, Marie-Pierre Gagnon, Mylène Boucher,  
43 Michèle Dugas, Mbemba Gisèle, Jack Tchuente conducted the data collection and analysis.  
44 Maxime Sasseville developed the first draft of the report. All authors contributed to writing  
45 and editing and gave the final approval of the version submitted.  
46  
47

48 **DATA STATEMENT:** Available with the first (MS) or last (MPG) authors.  
49  
50  
51  
52  
53  
54  
55  
56  
57  
58  
59  
60

## REFERENCES

1. World Health Organisation. Global status report on noncommunicable diseases. Geneva, Switzerland; 2014.
2. Chapman DP, Perry GS, Strine TW. Peer reviewed: the vital link between chronic disease and depressive disorders. *Preventing Chronic Disease*. 2005;2(1).
3. Barnett K, Mercer SW, Norbury M, Watt G, Wyke S, Guthrie B. Epidemiology of multimorbidity and implications for health care, research, and medical education: a cross-sectional study. *The Lancet*. 2012;380(9836):37-43.
4. Naylor C, Parsonage M, McDaid D, Knapp M, Fossey M, Galea A. Long-term conditions and mental health: the cost of co-morbidities. The King's Fund and Centre for Mental Health; 2012.
5. Shigemura J, Ursano RJ, Morganstein JC, Kurosawa M, Benedek DM. Public responses to the novel 2019 coronavirus (2019-nCoV) in Japan: Mental health consequences and target populations. *Psychiatry and Clinical Neurosciences*. 2020;74(4):281.
6. García-Lizana F, Muñoz-Mayorga I. Telemedicine for depression: a systematic review. *Perspective Psychiatry Care*. 2010;46(2):119-26.
7. Richards D, Richardson T. Computer-based psychological treatments for depression: a systematic review and meta-analysis. *Clinical Psychology Review*. 2012;32(4):329-42.
8. Garritty C GG, Kamel C, King VJ, Nussbaumer-Streit B, Stevens A, Hamel C, Affengruber L. Cochrane Rapid Reviews. . Interim Guidance from the Cochrane Rapid Reviews Methods Group. In: Reviews. CR, editor.: Cochrane Collaboration; 2020.
9. Moher D, Liberati A, Tetzlaff J, Altman DG. Preferred reporting items for systematic reviews and meta-analyses: the PRISMA statement. *PLoS Medicine*. 2009;6(7):e1000097.
10. Goldstein KM, Fisher DA, Wu RR, Orlando LA, Coffman CJ, Grubber JM, et al. An electronic family health history tool to identify and manage patients at increased risk for colorectal cancer: protocol for a randomized controlled trial. *Trials*. 2019;20(1):576.
11. Shea BJ, Reeves BC, Wells G, Thuku M, Hamel C, Moran J, et al. AMSTAR 2: a critical appraisal tool for systematic reviews that include randomised or non-randomised studies of healthcare interventions, or both. *BMJ*. 2017;358:j4008.
12. Agboola SO, Ju W, Elfiky A, Kvedar JC, Jethwani K. The effect of technology-based interventions on pain, depression, and quality of life in patients with cancer: a systematic review of randomized controlled trials. *Journal of Medical Internet Research*. 2015;17(3):e65.
13. Bartolo A, Pacheco E, Rodrigues F, Pereira A, Monteiro S, Santos IM. Effectiveness of psycho-educational interventions with telecommunication technologies on emotional distress and quality of life of adult cancer patients: a systematic review. *Disability & Rehabilitation*. 2019;41(8):870-8.
14. Beatty L, Lambert S. A systematic review of internet-based self-help therapeutic interventions to improve distress and disease-control among adults with chronic health conditions. *Clinical Psychology Review*. 2013;33(4):609-22.
15. Bouma G, Admiraal JM, de Vries EGE, Schroder CP, Walenkamp AME, Reyners AKL. Internet-based support programs to alleviate psychosocial and physical symptoms in cancer patients: A literature analysis. *Critical Reviews in Oncology/Hematology*. 2015;95(1):26-37.
16. Charova E, Dorstyn D, Tully P, Mittag O. Web-based interventions for comorbid depression and chronic illness: a systematic review. *Journal of Telemedicine & Telecare*. 2015;21(4):189-201.
17. Chen YY, Guan BS, Li ZK, Li XY. Effect of telehealth intervention on breast cancer patients' quality of life and psychological outcomes: A meta-analysis. *Journal of Telemedicine & Telecare*. 2018;24(3):157-67.
18. Clari M, Conti A, Fontanella R, Rossi A, Matarese M. Mindfulness-Based Programs for People with Chronic Obstructive Pulmonary Disease: a Mixed Methods Systematic Review. *Mindfulness*. 2020:20.
19. Eccleston C, Fisher E, Brown R, Craig L, Duggan GB, Rosser BA, et al. Psychological therapies (Internet-delivered) for the management of chronic pain in adults. *Cochrane Database of Systematic Reviews*. 2019(9).

20. Fisher E, Law E, Dudeney J, Eccleston C, Palermo TM. Psychological therapies (remotely delivered) for the management of chronic and recurrent pain in children and adolescents. *Cochrane Database of Systematic Reviews*. 2019(9).
21. Forbes CC, Finlay A, McIntosh M, Siddiquee S, Short CE. A systematic review of the feasibility, acceptability, and efficacy of online supportive care interventions targeting men with a history of prostate cancer. *Journal of Cancer Survivorship : Research and Practice*. 2019;13(1):75-96.
22. Fridriksdottir N, Gunnarsdottir S, Zoega S, Ingadottir B, Hafsteinsdottir EJG. Effects of web-based interventions on cancer patients' symptoms: review of randomized trials. *Supportive Care in Cancer*. 2018;26(2):337-51.
23. Hedman E, Ljotsson B, Lindefors N. Cognitive behavior therapy via the Internet: a systematic review of applications, clinical efficacy and cost-effectiveness. *Expert Review of Pharmacoeconomics & Outcomes Research*. 2012;12(6):745-64.
24. Kim AR, Park HA. Web-based Self-management Support Interventions for Cancer Survivors: A Systematic Review and Meta-analyses. *Studies in Health Technology & Informatics*. 2015;216:142-7.
25. Kim SH, Kim K, Mayer DK. Self-Management Intervention for Adult Cancer Survivors After Treatment: A Systematic Review and Meta-Analysis. *Oncology Nursing Forum*. 2017;44(6):719-28.
26. Lewis C, Roberts NP, Bethell A, Robertson L, Bisson JI. Internet-based cognitive and behavioural therapies for post-traumatic stress disorder (PTSD) in adults. *Cochrane Database of Systematic Reviews*. 2018(12).
27. Lin H, Ye M, Chan SWC, Zhu J, He H. The effectiveness of online interventions for patients with gynecological cancer: An integrative review. *Gynecologic Oncology*. 2020.
28. Lopez-Rodriguez MM, Fernandez-Millan A, Ruiz-Fernandez MD, Dobarrío-Sanz I, Fernandez-Medina IM. New Technologies to Improve Pain, Anxiety and Depression in Children and Adolescents with Cancer: A Systematic Review. *International Journal of Environmental Research & Public Health*. 2020;17(10):19.
29. MayoWilson E, Montgomery P. Media-delivered cognitive behavioural therapy and behavioural therapy (self-help) for anxiety disorders in adults. *Cochrane Database of Systematic Reviews*. 2013(9).
30. McCaughan E, Parahoo K, Hueter I, Northouse L, Bradbury I. Online support groups for women with breast cancer. *Cochrane Database of Systematic Reviews*. 2017;3:CD011652.
31. McCombie A, Geary R, Andrews J, Mikocka-Walus A, Mulder R. Computerised Cognitive Behavioural Therapy for Psychological Distress in Patients with Physical Illnesses: A Systematic Review. *Journal of Clinical Psychology in Medical Settings*. 2015;22(1):20-44.
32. McGar AB, Kindler C, Marsac M. Electronic Health Interventions for Preventing and Treating Negative Psychological Sequelae Resulting From Pediatric Medical Conditions: Systematic Review. *JMIR Pediatrics and Parenting*. 2019;2(2):e12427.
33. Mehta S, Peynenburg VA, Hadjistavropoulos HD. Internet-delivered cognitive behaviour therapy for chronic health conditions: a systematic review and meta-analysis. *Journal of Behavioral Medicine*. 2019;42(2):169-87.
34. Mikolasek M, Berg J, Witt CM, Barth J. Effectiveness of Mindfulness- and Relaxation-Based eHealth Interventions for Patients with Medical Conditions: a Systematic Review and Synthesis. *Int J Behav Med*. 2018;25(1):1-16.
35. Olthuis JV, Watt MC, Bailey K, Hayden JA, Stewart SH. Therapist-supported Internet cognitive behavioural therapy for anxiety disorders in adults. *Cochrane Database of Systematic Reviews*. 2016(3).
36. Palacios J, Lee GA, Duaso M, Clifton A, Norman IJ, Richards D, et al. Internet-Delivered Self-management Support for Improving Coronary Heart Disease and Self-management-Related Outcomes: A Systematic Review. *Journal of Cardiovascular Nursing*. 2017;32(4):E9-E23.
37. Paul CL, Carey ML, Sanson-Fisher RW, Houlcroft LE, Turon HE. The impact of web-based approaches on psychosocial health in chronic physical and mental health conditions. *Health Education Research*. 2013;28(3):450-71.
38. Qan'ir Y, Song L. Systematic review of technology-based interventions to improve anxiety, depression, and health-related quality of life among patients with prostate cancer. *Psycho-Oncology*. 2019;28(8):1601-13.

- 1
- 2
- 3 39. Tang WX, Zhang LF, Ai YQ, Li ZS. Efficacy of Internet-delivered cognitive-behavioral
- 4 therapy for the management of chronic pain in children and adolescents: A systematic review and
- 5 meta-analysis. *Medicine*. 2018;97(36):e12061.
- 6 40. Toivonen KI, Zernicke K, Carlson LE. Web-Based Mindfulness Interventions for People
- 7 With Physical Health Conditions: Systematic Review. *Journal of Medical Internet Research*.
- 8 2017;19(8):e303.
- 9 41. Ugalde A, Haynes K, White V, Krishnasamy M, Boltong A, Schofield P, et al. Self-guided
- 10 psychological interventions for people with cancer: A systematic review. *Asia-Pacific Journal of*
- 11 *Clinical Oncology*. 2015;4:146.
- 12 42. van Beugen S, Ferwerda M, Hoeve D, Rovers MM, Spillekom-van Koulil S, van Middendorp
- 13 H, et al. Internet-based cognitive behavioral therapy for patients with chronic somatic conditions: a
- 14 meta-analytic review. *Journal of Medical Internet Research*. 2014;16(3):e88.
- 15 43. Vugts MAP, Joosen MCW, van der Geer JE, Zedlitz AMEE, Vrijhoef HJM. The effectiveness
- 16 of various computer-based interventions for patients with chronic pain or functional somatic
- 17 syndromes: A systematic review and meta-analysis. *PLoS ONE*. 2018;13 (5) (no
- 18 pagination)(e0196467).
- 19 44. Wang Y, Lin Y, Chen J, Wang C, Hu R, Wu Y. Effects of Internet-based psycho-educational
- 20 interventions on mental health and quality of life among cancer patients: a systematic review and
- 21 meta-analysis. *Supportive Care in Cancer*. 2020;28(6):2541-52.
- 22 45. Wickersham A, Petrides PM, Williamson V, Leightley D. Efficacy of mobile application
- 23 interventions for the treatment of post-traumatic stress disorder: A systematic review. *Digit Health*.
- 24 2019;5:11.
- 25 46. Zeng Y, Zhang JE, Cheng ASK, Cheng H, Wefel JS. Meta-Analysis of the Efficacy of Virtual
- 26 Reality-Based Interventions in Cancer-Related Symptom Management. *Integrative Cancer Therapies*.
- 27 2019;18:1534735419871108.
- 28 47. Cuijpers P, Van Straten A, Andersson G. Internet-administered cognitive behavior therapy for
- 29 health problems: a systematic review. *Journal of Behavioral Medicine*. 2008;31(2):169-77.
- 30 48. McAlpine H, Joubert L, Martin-Sanchez F, Merolli M, Drummond KJ. A systematic review
- 31 of types and efficacy of online interventions for cancer patients. *Patient Education and Counseling*.
- 32 2015;98(3):283-95.
- 33 49. Hollis C, Falconer CJ, Martin JL, Whittington C, Stockton S, Glazebrook C, et al. Annual
- 34 Research Review: Digital health interventions for children and young people with mental health
- 35 problems—a systematic and meta-review. *Journal of Child Psychology and Psychiatry*.
- 36 2017;58(4):474-503.
- 37 50. Torous J, Myrick KJ, Rauseo-Ricupero N, Firth J. Digital mental health and COVID-19:
- 38 Using technology today to accelerate the curve on access and quality tomorrow. *Journal of Medical*
- 39 *Internet Research: Mental Health*. 2020;7(3):e18848.
- 40
- 41
- 42
- 43
- 44
- 45
- 46
- 47
- 48
- 49
- 50
- 51
- 52
- 53
- 54
- 55
- 56
- 57
- 58
- 59
- 60



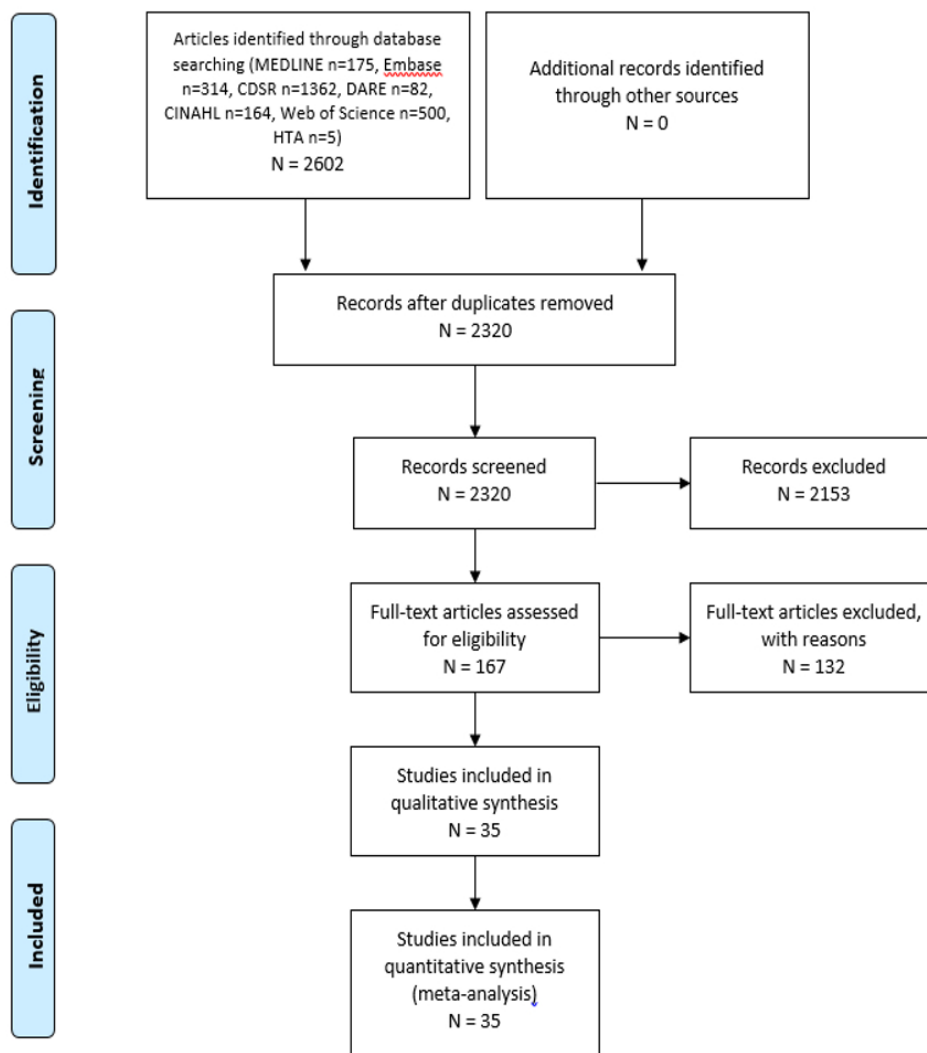

Figure 1. Study Flow Diagram

1  
2  
3  
4  
5  
6  
7  
8  
9  
10  
11  
12  
13  
14  
15  
16  
17  
18  
19  
20  
21  
22  
23  
24  
25  
26  
27  
28  
29  
30  
31  
32  
33  
34  
35  
36  
37  
38  
39  
40  
41  
42  
43  
44  
45  
46  
47  
48  
49  
50  
51  
52  
53  
54  
55  
56  
57  
58  
59  
60

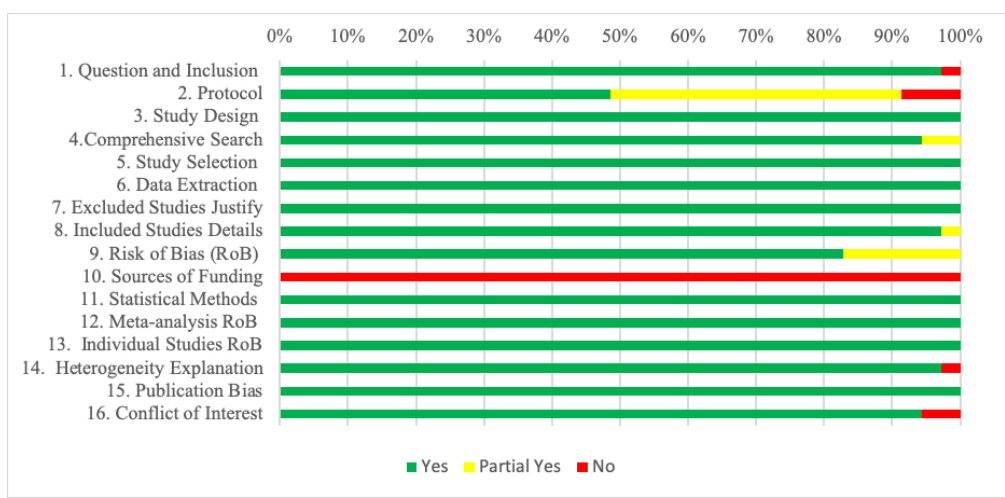

Figure 2. Risk of bias for individual items of the AMSTAR 2 tool.



**Additional Table 1. Type of intervention and outcomes**

|                                   | Web-based | Patient portal | Phone application | Virtual reality | Email | Text message | Online chat | Teleconsultation | Depression outcomes | Anxiety outcomes | Other mental health outcomes |
|-----------------------------------|-----------|----------------|-------------------|-----------------|-------|--------------|-------------|------------------|---------------------|------------------|------------------------------|
| <b>CHRONIC DISEASES CLUSTER</b>   |           |                |                   |                 |       |              |             |                  |                     |                  |                              |
| Hedman, 2012 (23)                 | X         |                |                   |                 |       |              |             |                  | +++                 | +++              | NR                           |
| Eccleston, 2019 (19)              | X         | X              |                   |                 |       |              |             | X                | =                   | =                | NR                           |
| van Beugen, 2014 (42)             | X         | X              |                   |                 | X     | X            | X           |                  | +                   | =                | =                            |
| Vugts, 2018 (43)                  | X         |                |                   |                 | X     | X            | X           | X                | +                   | NR               | NR                           |
| Charova 2015 (16)                 | X         |                |                   |                 |       |              |             |                  | +                   | NR               | NR                           |
| Palacios, 2017 (36)               | X         | X              |                   |                 | X     | X            |             |                  | +                   | NR               | NR                           |
| McCombie, 2015 (31)               | X         |                |                   |                 |       |              |             |                  | +                   | +                | NR                           |
| Beatty 2013 (14)                  | X         | X              |                   |                 | X     |              |             | X                | +                   | +                | NR                           |
| Toivonen, 2017(40)                | X         |                |                   |                 | X     |              | X           |                  | +                   | +                | NR                           |
| Mehta, 2018 (33)                  | X         |                |                   |                 | X     |              |             |                  | ++                  | +                | NR                           |
| Mikolasek, 2018 (34)              | X         |                |                   |                 |       |              |             |                  | +                   | +                | NR                           |
| Paul, 2013 (37)                   | X         |                |                   |                 |       |              | X           |                  | +                   | +                | +/-                          |
| Clari, 2020 (18)                  |           |                |                   |                 |       |              |             | X                | =                   | =                | NR                           |
| <b>CANCER POPULATION CLUSTER</b>  |           |                |                   |                 |       |              |             |                  |                     |                  |                              |
| Chen, 2018 (17)                   | X         |                |                   |                 |       |              |             | X                | +++                 | +                | +                            |
| McCaughan, 2017 (30)              | X         | X              |                   |                 | X     |              | X           |                  | =                   | +                | NR                           |
| Wang, 2020 (44)                   | X         |                | X                 |                 | X     |              |             |                  | +                   | ++               | NR                           |
| Zeng, 2019 (46)                   |           |                |                   | X               |       |              |             |                  | =                   | =                | NR                           |
| Kim, 2015 (24)                    | X         |                |                   |                 | X     | X            | X           | X                | +                   | +                | +                            |
| Kim, 2017 (25)                    | X         |                |                   |                 |       |              |             | X                | =                   | =                | NR                           |
| Lin, 2020 (27)                    | X         | X              |                   |                 | X     | X            |             |                  | +/-                 | +/-              | NR                           |
| Qan'ir, 2019 (38)                 | X         | X              |                   |                 |       |              | X           |                  | +/-                 | +/-              | NR                           |
| Forbes, 2019 (21)                 | X         |                |                   |                 | X     |              | X           |                  | +                   | NR               | +                            |
| Fridriksdottir, 2017 (22)         | X         |                |                   |                 | X     |              |             |                  | +/-                 | +/-              | +/-                          |
| Bouma 2015 (15)                   | X         |                |                   |                 |       |              |             |                  | +/-                 | +/-              | +/-                          |
| Ugalde, 2015 (41)                 | X         |                |                   |                 |       |              |             |                  | NR                  | NR               | +                            |
| Agboola 2015 (12)                 | X         | X              | X                 |                 | X     | X            | X           |                  | =                   | +/-              |                              |
| Bartolo 2019 (13)                 | X         |                |                   |                 | X     |              | X           |                  | +                   | NR               | +                            |
| <b>YOUTH AND CHILDREN CLUSTER</b> |           |                |                   |                 |       |              |             |                  |                     |                  |                              |
| Fisher, 2019 (20)                 | X         | X              |                   |                 |       |              |             |                  | +                   | +                | NR                           |
| Tang, 2018 (39)                   | X         |                |                   |                 |       |              |             |                  | +                   | +++              | NR                           |
| McGar, 2019 (32)                  | X         |                |                   |                 |       |              |             |                  | +/-                 | +                | +                            |
| Lopez-Rodriguez, 2020 (28)        |           |                | X                 | X               |       |              |             |                  | +                   | +                | NR                           |
| <b>MENTAL HEALTH POPULATION</b>   |           |                |                   |                 |       |              |             |                  |                     |                  |                              |
| MayoWilson, 2013 (29)             | X         |                |                   |                 | X     | X            | X           |                  | NR                  | ++               | NR                           |
| Olthuis, 2016 (35)                | X         | X              |                   |                 | X     |              | X           |                  | NR                  | ++               | NR                           |
| Wickersham, 2019 (45)             |           | X              |                   |                 |       |              |             |                  | NR                  | NR               | =                            |
| Lewis, 2018 (26)                  | X         |                |                   |                 |       |              |             |                  | ++                  | +                | ++                           |

NOTE: NR: not reported, + : small effect size or improvement without a report on effect size; ++ : moderate effect size ; +++ : large effect size; +/- : mixed effect ; = : no difference.

**Table 1. PICO Eligibility Criteria**

|                         |                                                                                                                                                                                                                                                                                                                                                                                                                                                                                                                                                                                                                    |
|-------------------------|--------------------------------------------------------------------------------------------------------------------------------------------------------------------------------------------------------------------------------------------------------------------------------------------------------------------------------------------------------------------------------------------------------------------------------------------------------------------------------------------------------------------------------------------------------------------------------------------------------------------|
| <b>Population (P)</b>   | Adults with any chronic disease (e.g., diabetes, ischemic heart diseases, cerebrovascular diseases, chronic obstructive pulmonary disease (COPD), asthma, hypertension, dyslipidemia, arthritis/rheumatoid arthritis, chronic pain, cancer, chronic renal disease, inflammatory bowel diseases, mood disorders, attention deficit disorders). We will rely in the authors' definition of chronic disease AND presenting, or at risk of presenting, a concomitant mental health problem (e.g., mood disorders, depression, anxiety, obsessive compulsive disorder, panic disorder, post-traumatic stress disorder). |
| <b>Intervention (I)</b> | Digital health technologies, including but not limited to: telemedicine/teleconsultation, patient portal, electronic health record, web-based/internet intervention, or smart phone applications.                                                                                                                                                                                                                                                                                                                                                                                                                  |
| <b>Comparator (C)</b>   | No intervention, usual care, any other (digital or non-digital) intervention.                                                                                                                                                                                                                                                                                                                                                                                                                                                                                                                                      |
| <b>Outcomes (O)</b>     | Prevalence of mental health problems; scores of depression, anxiety or other mental health problem; quality of life; specific clinical indicators (e.g., HbA1c for diabetes); patient satisfaction; impact on care utilization (e.g., ED visits, hospitalization, outpatient consultations); costs (for the individual and the health system).                                                                                                                                                                                                                                                                     |

**Table 2. Description of included reviews**

| Author, Year                   | Review Design | n of primary studies, Design | n of patients (pooled) | Type of chronic diseases                      | Type of Digital technology interventions                                   | Depression outcomes                                                                                                                                                                                                                                               | Anxiety outcomes                         | Other mental health outcomes                                                                                                                                                                              |
|--------------------------------|---------------|------------------------------|------------------------|-----------------------------------------------|----------------------------------------------------------------------------|-------------------------------------------------------------------------------------------------------------------------------------------------------------------------------------------------------------------------------------------------------------------|------------------------------------------|-----------------------------------------------------------------------------------------------------------------------------------------------------------------------------------------------------------|
| <b>Chronic Disease Cluster</b> |               |                              |                        |                                               |                                                                            |                                                                                                                                                                                                                                                                   |                                          |                                                                                                                                                                                                           |
| Beatty 2013 (14)               | SR            | 24<br>Experimental           | NR                     | Chronic physical diseases                     | Web-based/internet intervention, App, Email, Telemedicine/teleconsultation | Improvement between groups comparison. Improvement within group (moderate effect size). Improvement sustained at 12 months follow-up. iCBT with and without therapist showed no differences between groups. iCBT showed no difference when compared to group-CBT. | Improvement at 3 months and at 12 months | NR                                                                                                                                                                                                        |
| Charova 2015 (16)              | SR with MA    | 11<br>Experimental           | 1348                   | Any chronic disease with comorbid MH disorder | Web-based/internet intervention                                            | DW 0.31; CI 0.17 to 0.45; p<0.01                                                                                                                                                                                                                                  | NR                                       | NR                                                                                                                                                                                                        |
| Clari, 2020 (18)               | SR            | 1<br>Mixed                   | 84                     | COPD                                          | Telemedicine/teleconsultation                                              | No difference between groups.                                                                                                                                                                                                                                     | No difference between groups.            | Qualitative data:<br>Promoted active acceptance of their disease /Improved the awareness of their physical sensations /Helped identify signs and symptoms /Improvement of the management of acute events. |

|    |             |          |              |      |              |                      |                           |                          |                        |
|----|-------------|----------|--------------|------|--------------|----------------------|---------------------------|--------------------------|------------------------|
| 1  |             |          |              |      |              |                      |                           |                          |                        |
| 2  |             |          |              |      |              |                      |                           |                          |                        |
| 3  | Eccleston,  | SR with  | 14           | 2012 | Chronic pain | Web-based/internet   | SMD = -0.26 [95% CI       | SMD = -0.48 [95% CI      | NR                     |
| 4  | 2019 (19)   | MA       | Experimental |      |              | intervention, App,   | -0.87 to 0.36]            | -1.22to 0.27]            |                        |
| 5  |             |          |              |      |              | Telemedicine/teleco  |                           |                          |                        |
| 6  |             |          |              |      |              | nsultation           |                           |                          |                        |
| 7  |             |          |              |      |              |                      |                           |                          |                        |
| 8  | Hedman,     | SR with  | 108          | NR   | Any          | Web-based/internet   | MD = 0.94 [95% CI:        | MD = 1.12 [95% CI:       | NR                     |
| 9  | 2012 (23)   | MA       | Experimental |      |              | intervention         | 0.77-1.11] Large effect   | 0.61-1.62],              |                        |
| 10 |             |          |              |      |              |                      | size, within groups       | Large effect size.       |                        |
| 11 | McCombie    | SR       | 29           | 3935 | Chronic      | Web-based/internet   | Improvement of            | Improvement (2/7)        | NR                     |
| 12 | , 2015 (31) |          | Mixed        |      | physical     | intervention         | depression scores (4/8)   |                          |                        |
| 13 |             |          |              |      | diseases     |                      |                           |                          |                        |
| 14 |             |          |              |      |              |                      |                           |                          |                        |
| 15 | Mehta,      | SR with  | 25           | 3450 | Any          | Web-based/internet   | Improved depression       | Improved anxiety,        | NR                     |
| 16 | 2018 (33)   | MA       | Experimental |      |              | intervention, Email  | symptoms with small to    | similar effect size than |                        |
| 17 |             |          |              |      |              |                      | medium effect size.       | usual care.              |                        |
| 18 |             |          |              |      |              |                      | Therapist guided ICBT     |                          |                        |
| 19 |             |          |              |      |              |                      | showed larger effect size |                          |                        |
| 20 |             |          |              |      |              |                      | than self-guided ICBT.    |                          |                        |
| 21 | Mikolasek,  | SR with  | 17           | 1855 | Chronic      | Web-based/internet   | Active control: 2/7       | Active control: 2/7      | NR                     |
| 22 | 2018 (34)   | Meta-    | Experimental |      | physical     | intervention         | showed superior           | showed superior          |                        |
| 23 |             | Analysis |              |      | diseases     |                      | effectiveness; 4/7 equal  | effectiveness; 4/7 equal |                        |
| 24 |             |          |              |      |              |                      | effectiveness; 1/7        | effectiveness; 1/7       |                        |
| 25 |             |          |              |      |              |                      | inferior effectiveness.   | inferior effectiveness.  |                        |
| 26 |             |          |              |      |              |                      | Usual care: 1/4 showed    | Usual care: 1/4 showed   |                        |
| 27 |             |          |              |      |              |                      | superior effectiveness;   | superior effectiveness;  |                        |
| 28 |             |          |              |      |              |                      | 3/4 showed equal          | 3/4 showed equal         |                        |
| 29 |             |          |              |      |              |                      | effectiveness.            | effectiveness.           |                        |
| 30 | Palacios,   | SR       | 7            | 1321 | Chronic      | Web-based/internet   | PHQ-9 score mean from     | NR                       | NR                     |
| 31 | 2017 (36)   |          | Experimental |      | physical     | intervention, App,   | 12 (post) to 8.4 (follow- |                          |                        |
| 32 |             |          |              |      | diseases     | Email, Text          | up)                       |                          |                        |
| 33 |             |          |              |      |              | message              |                           |                          |                        |
| 34 | Paul, 2013  | SR       | 36           | NR   | Any chronic  | Web-based/internet   | Improved depression in    | Improved anxiety in      | Mixed results in       |
| 35 | (37)        |          | Experimental |      | disease with | intervention, Online | comparison between        | comparison with          | psychosocial outcomes. |
| 36 |             |          |              |      | comorbid     | chat                 | groups.                   | control                  |                        |
| 37 |             |          |              |      | MH disorder  |                      |                           |                          |                        |
| 38 |             |          |              |      |              |                      |                           |                          |                        |
| 39 |             |          |              |      |              |                      |                           |                          |                        |
| 40 |             |          |              |      |              |                      |                           |                          |                        |
| 41 |             |          |              |      |              |                      |                           |                          |                        |
| 42 |             |          |              |      |              |                      |                           |                          |                        |
| 43 |             |          |              |      |              |                      |                           |                          |                        |
| 44 |             |          |              |      |              |                      |                           |                          |                        |
| 45 |             |          |              |      |              |                      |                           |                          |                        |
| 46 |             |          |              |      |              |                      |                           |                          |                        |

1  
2  
3  
4  
5  
6  
7  
8  
9  
10  
11  
12  
13  
14  
15  
16  
17  
18  
19  
20  
21  
22  
23  
24  
25  
26  
27  
28  
29  
30  
31  
32  
33  
34  
35  
36  
37  
38  
39  
40  
41  
42  
43  
44  
45  
46

|                       |            |                    |      |                           |                                                                                                    |                                                                                                                                                                                                                                                                     |                                                     |                                                    |
|-----------------------|------------|--------------------|------|---------------------------|----------------------------------------------------------------------------------------------------|---------------------------------------------------------------------------------------------------------------------------------------------------------------------------------------------------------------------------------------------------------------------|-----------------------------------------------------|----------------------------------------------------|
| Toivonen, 2017(40)    | SR         | 16<br>Experimental | NR   | Any                       | Web-based/internet intervention, Email, Online chat                                                | Improved depression symptoms with a small effect size.                                                                                                                                                                                                              | Improved anxiety symptoms with a small effect size. | NR                                                 |
| van Beugen, 2014 (42) | SR with MA | 23<br>Experimental | 2299 | Any                       | Web-based/internet intervention, App, Email, Text message, Online chat                             | SMD = 0.21 [95% CI: 0.08-0.34]                                                                                                                                                                                                                                      | SMD = 0.17 [95% CI:0.01-0.32]                       | General distress: SMD = 0.21 [CI:0.00-0.41]        |
| Vugts, 2018 (43)      | SR with MA | 46<br>Experimental | NR   | Chronic physical diseases | Web-based/internet intervention, Email, Text message, Online chat, Telemedicine/teleconsultation   | SMD =-0.18 [95%CI -0.28, -.07]<br>SMD =-.18 [95% CI:-.28, -.07] Passive control (post)<br>SMD =-.29 [95% CI:-.48, -.10] Passive control (follow-up)<br>SMD =.14 [95% CI:-.37, .09] Active control (post)<br>SMD =.31 [95% CI: -.78, .16] Active control (follow-up) | NR                                                  | NR                                                 |
| <b>Cancer Cluster</b> |            |                    |      |                           |                                                                                                    |                                                                                                                                                                                                                                                                     |                                                     |                                                    |
| Agboola 2015 (12)     | SR         | 20<br>Experimental | 3789 | Cancer                    | Web-based/internet, App, Virtual reality, Text message, Online chat, Telemedicine/teleconsultation | heterogeneous studies no pooling possible                                                                                                                                                                                                                           | Improvement in anxiety symptoms (3/8)               | NR                                                 |
| Bartolo 2019 (13)     | SR         | 8<br>Experimental  | 1016 | Cancer                    | Web-based/internet, Patient portal, App, Email,                                                    | Improvement in depression symptoms 3 weeks post interventions. small effect size                                                                                                                                                                                    | NR                                                  | Improvement in global distress, small effect size. |

|  |                          |            |                    |      |        |                                                                                                  |                                                                                                   |                                        |                                                                           |
|--|--------------------------|------------|--------------------|------|--------|--------------------------------------------------------------------------------------------------|---------------------------------------------------------------------------------------------------|----------------------------------------|---------------------------------------------------------------------------|
|  |                          |            |                    |      |        | Telemedicine/teleconsultation                                                                    | The telephone intervention yielded medium effect size improvement.                                |                                        |                                                                           |
|  | Bouma 2015 (15)          | SR         | 16<br>Experimental | 2620 | Cancer | Web-based/internet intervention                                                                  | Improvement on depression symptoms (1/7) (between groups)                                         | Improvement in anxiety symptoms (2/10) | Improvement on quality of life (3/11)                                     |
|  | Chen, 2018 (17)          | SR with MA | 20<br>Experimental | 2190 | Cancer | Web-based/internet intervention, Telemedicine/teleconsultation                                   | SMD = 1.29, [95% CI 2.28 to 0.30]                                                                 | SMD = 0.09, [95% CI 0.22 to 0.04]      | Distress: SMD = ¼ 0.25, [95% CI 0.40 to 0.10, p < 0.001]                  |
|  | Forbes, 2019 (21)        | SR         | 16<br>Experimental | 2446 | Cancer | Web-based/internet intervention, Email, Online chat                                              | Improvement of depression score within group.                                                     | NR                                     | Psychological distress: effect size larger with ICBT compared with forum. |
|  | Fridriksdotir, 2017 (22) | SR         | 20<br>Experimental | NR   | Cancer | Web-based/internet intervention, Email                                                           | Better improvement with CBT compared to online forum<br>Improvement in depression symptoms (2/10) | Improvement in anxiety symptoms (4/10) | Improvement on psychological distress. (3/8)                              |
|  | Kim, 2015 (24)           | SR with MA | 37<br>Experimental | NR   | Cancer | Web-based/internet intervention, Email, Text message, Online chat, Telemedicine/teleconsultation | Hedges'g = -0.169 [-0.282 - -0.055]                                                               | Hedges'g = -0.293 [-0.465 - -0.122]    | QOL: Hedges'g = -0.221 [-0.359 - -0.084]                                  |
|  | Kim, 2017 (25)           | SR with MA | 19<br>Mixed        | 2381 | Cancer | Web-based/internet intervention, Telemedicine/teleconsultation                                   | d = -0.07, p = 0.284 (post)<br>d = -0.2, p = 0.477 (follow-up)                                    | d = -0.2, p = 0.132                    | NR                                                                        |
|  | Lin, 2020 (27)           | Mixed      | 16<br>Mixed        | 1053 | Cancer | Web-based/internet intervention, App,                                                            | Improvement of depression scores (5/11)                                                           | Improvement of anxiety scores (5/11)   | NR                                                                        |

|                                   |                            |            |                    |      |              | Email, Text message                                                 |                                                               |                                                                                                                               |                                                        |
|-----------------------------------|----------------------------|------------|--------------------|------|--------------|---------------------------------------------------------------------|---------------------------------------------------------------|-------------------------------------------------------------------------------------------------------------------------------|--------------------------------------------------------|
| 6                                 | McCaughan, 2017 (30)       | SR         | 6<br>Experimental  | 492  | Cancer       | Web-based/internet intervention, Patient portal, Email, Online chat | SMD = -0.37, [95% CI -0.75 to 0.00]                           | Mean 0.4 lower at end of intervention [95% CI 6.42 lower to 5.62 higher]                                                      | NR                                                     |
| 15                                | Qan'ir, 2019 (38)          | SR with MA | 10<br>Experimental | 1124 | Cancer       | Web-based/internet intervention, App, Online chat                   | Improvement of depression score (between group) (2/7)         | MD = -0.40, [95% CI -6.42 to 5.62]; low-quality evidence between groups<br>Improvement of anxiety score (between group) (1/5) | NR                                                     |
| 22                                | Ugalde, 2015 (41)          | SR         | 4<br>Experimental  | NR   | Cancer       | Web-based/internet intervention                                     | Improvement of depression score (within group)(1/7)<br>NR     | Improvement of anxiety score (within group) (1/5)<br>NR                                                                       | **Improved self-efficacy for regulating negative mood. |
| 25                                | Wang, 2020 (44)            | SR with MA | 7<br>Experimental  | 1220 | Cancer       | Web-based/internet intervention, App, Email                         | SMD = -0.58, 95% CI (-1.12, -0.03), p = 0.04 (between groups) | SMD = -1.03 [95% CI -2.63, 0.57]), (between groups)                                                                           | NR                                                     |
| 29                                | Zeng, 2019 (46)            | SR with MA | 6<br>Mixed         | NR   | Cancer       | Virtual reality                                                     | WMD = -1.11 [Z scores = 1.05, P = .29]                        | SMD = -3.03 [95% CI = -6.20 to 0.15]                                                                                          | NR                                                     |
| <b>Youth and Children Cluster</b> |                            |            |                    |      |              |                                                                     |                                                               |                                                                                                                               |                                                        |
| 33                                | Fisher, 2019 (20)          | SR with MA | 10<br>Mixed        | 697  | Chronic pain | Web-based/internet intervention, App                                | SMD 0.04, [95% CI -0.18 to 0.26]                              | SMD 0.53, [95% CI -0.63 to 1.68]                                                                                              | NR                                                     |
| 36                                | Lopez-Rodriguez, 2020 (28) | SR         | 8<br>Mixed         | 286  | Cancer       | App, Virtual reality                                                | Improved depression (3/3)                                     | Improved anxiety (2/3)                                                                                                        | NR                                                     |



|    |                              |         |              |      |              |                      |                          |                          |                          |  |
|----|------------------------------|---------|--------------|------|--------------|----------------------|--------------------------|--------------------------|--------------------------|--|
| 1  |                              |         |              |      |              |                      |                          |                          |                          |  |
| 2  |                              |         |              |      |              |                      |                          |                          |                          |  |
| 3  | McGar,                       | SR      | 22           | 1764 | Chronic      | Web-based/internet   | Improved depression      | Improved anxiety (4/5)   | Improved PTSD            |  |
| 4  | 2019 (32)                    |         | Experimental |      | physical     | intervention         | symptoms (3/7)           | (post)                   | symptoms (2/3) (post)    |  |
| 5  |                              |         |              |      | diseases     |                      |                          |                          |                          |  |
| 6  |                              |         |              |      |              |                      |                          |                          |                          |  |
| 7  | Tang, 2018                   | SR with | 4            | 404  | Chronic pain | Web-based/internet   | MD = 0.23, [95% CI:      | SMD = 3.24, [95% CI:     | NR                       |  |
| 8  | (39)                         | MA      | Experimental |      |              | intervention         | 0.03–0.43] (within       | 1.88–4.61], (within      |                          |  |
| 9  |                              |         |              |      |              |                      | group)                   | group)                   |                          |  |
| 10 |                              |         |              |      |              |                      | MD = 0.02, [95% CI:      | SMD = 0.41, [95% CI:     |                          |  |
| 11 |                              |         |              |      |              |                      | 0.19–0.22] (between      | 1.79–0.98] (between      |                          |  |
| 12 |                              |         |              |      |              |                      | group)                   | group)                   |                          |  |
| 13 |                              |         |              |      |              |                      | SMD = 0.02 [CI: 0.19,    |                          |                          |  |
| 14 |                              |         |              |      |              |                      | 0.22, p = 0.86] (follow- |                          |                          |  |
| 15 |                              |         |              |      |              |                      | up)                      |                          |                          |  |
| 16 | <b>Mental Health Cluster</b> |         |              |      |              |                      |                          |                          |                          |  |
| 17 | Lewis,                       | SR with | 10           | 720  | PTSD         | Web-based/internet   | SMD = -0.61 [95% CI –    | SMD = -0.67 [95% CI      | PTSD                     |  |
| 18 | 2018 (26)                    | MA      | Experimental |      |              | intervention         | 1.17 to -0.05] (between  | -0.98 to -0.36]          | SMD = -0.60 [95% CI –    |  |
| 19 |                              |         |              |      |              |                      | groups/post)             | (between groups/post)    | 0.97 to -0.24]. (between |  |
| 20 |                              |         |              |      |              |                      |                          |                          | groups/post)             |  |
| 21 |                              |         |              |      |              |                      | MD = -8.95, 95% CI –     | MD = -12.59 [95% CI      | RR = 0.53 [95% CI 0.28   |  |
| 22 |                              |         |              |      |              |                      | 15.57 to -2.33] (between | -20.74 to -4.44]         | to 1.00] (between        |  |
| 23 |                              |         |              |      |              |                      | groups/follow-up)        | (between                 | groups/post)             |  |
| 24 |                              |         |              |      |              |                      |                          | groups/follow-up)        |                          |  |
| 25 | MayoWils                     | SR with | 43           | 8403 | Anxiety      | Web-based/internet   | NR                       | SMD = 0.79, [95% CI      | NR                       |  |
| 26 | on, 2013                     | MA      | Experimental |      |              | intervention, Email, |                          | 0.62 to 0.96] (internet- |                          |  |
| 27 | (29)                         |         |              |      |              | Text message,        |                          | delivered)               |                          |  |
| 28 |                              |         |              |      |              | Telemedicine/teleco  |                          |                          |                          |  |
| 29 |                              |         |              |      |              | nsultation           |                          |                          |                          |  |
| 30 |                              |         |              |      |              |                      |                          |                          |                          |  |
| 31 | Olthuis,                     | SR with | 38           | 3214 | Anxiety      | Web-based/internet   | NR                       | *RR = 3.75 [95% CI       | NR                       |  |
| 32 | 2016 (35)                    | MA      | Experimental |      |              | intervention, App,   |                          | 2.51 to 5.60]            |                          |  |
| 33 |                              |         |              |      |              | Email, Online chat   |                          | (generalized anxiety)    |                          |  |
| 34 |                              |         |              |      |              |                      |                          |                          |                          |  |
| 35 |                              |         |              |      |              |                      |                          | SMD = -1.06 [95% CI      |                          |  |
| 36 |                              |         |              |      |              |                      |                          | -1.29 to -0.8] (disorder |                          |  |
| 37 |                              |         |              |      |              |                      |                          | specific anxiety)        |                          |  |
| 38 |                              |         |              |      |              |                      |                          |                          |                          |  |
| 39 |                              |         |              |      |              |                      |                          |                          |                          |  |
| 40 |                              |         |              |      |              |                      |                          |                          |                          |  |
| 41 |                              |         |              |      |              |                      |                          |                          |                          |  |
| 42 |                              |         |              |      |              |                      |                          |                          |                          |  |
| 43 |                              |         |              |      |              |                      |                          |                          |                          |  |
| 44 |                              |         |              |      |              |                      |                          |                          |                          |  |
| 45 |                              |         |              |      |              |                      |                          |                          |                          |  |
| 46 |                              |         |              |      |              |                      |                          |                          |                          |  |

1  
2  
3  
4  
5  
6  
7  
8  
9  
10  
11  
12  
13  
14  
15  
16  
17  
18  
19  
20  
21  
22  
23  
24  
25  
26  
27  
28  
29  
30  
31  
32  
33  
34  
35  
36  
37  
38  
39  
40  
41  
42  
43  
44  
45  
46

|                          |    |                   |     |      |     |    |    |                                                                    |
|--------------------------|----|-------------------|-----|------|-----|----|----|--------------------------------------------------------------------|
| Wickersham, 2019<br>(45) | SR | 5<br>Experimental | 653 | PTSD | App | NR | NR | No improvement in PTSD between groups when compared to usual care. |
|--------------------------|----|-------------------|-----|------|-----|----|----|--------------------------------------------------------------------|

---

NOTE: SR: Systematic review; MA: Meta-analysis; NR: Not reported; MH: Mental health; PTSD: Post-Traumatic Stress Disorder; COPD: Chronic Obstructive Pulmonary Disease

---

For peer review only

Table 3. Critical appraisal of the included reviews

|                      | 1. Question and Inclusion | 2. Protocol | 3. Study Design | 4. Comprehensive Search | 5. Study Selection | 6. Data Extraction | 7. Excluded Studies Justify | 8. Included Studies Details | 9. Risk of Bias (RoB) | 10. Sources of Funding | 11. Statistical Methods | 12. Meta-analysis RoB | 13. Individual Studies RoB | 14. Heterogeneity Explanation | 15. Publication Bias | 16. Conflict of Interest | Overall Confidence Rating |
|----------------------|---------------------------|-------------|-----------------|-------------------------|--------------------|--------------------|-----------------------------|-----------------------------|-----------------------|------------------------|-------------------------|-----------------------|----------------------------|-------------------------------|----------------------|--------------------------|---------------------------|
| Agboola 2015         | N                         | PY          | Y               | PY                      | Y                  | Y                  | Y                           | PY                          | Y                     | N                      | N/A                     | N/A                   | Y                          | N                             | N/A                  | Y                        | Low                       |
| Bartolo 2017         | Y                         | Y           | Y               | Y                       | Y                  | Y                  | Y                           | Y                           | PY                    | N                      | N/A                     | N/A                   | Y                          | Y                             | N/A                  | Y                        | Moderate                  |
| Beatty 2012          | Y                         | PY          | Y               | Y                       | Y                  | Y                  | Y                           | Y                           | Y                     | N                      | N/A                     | N/A                   | Y                          | Y                             | N/A                  | N                        | Moderate                  |
| Bouma 2019           | Y                         | PY          | Y               | Y                       | Y                  | Y                  | Y                           | Y                           | Y                     | N                      | N/A                     | N/A                   | Y                          | Y                             | N/A                  | Y                        | Moderate                  |
| Charova 2015         | Y                         | Y           | Y               | Y                       | Y                  | Y                  | Y                           | Y                           | PY                    | N                      | Y                       | Y                     | Y                          | Y                             | Y                    | Y                        | Moderate                  |
| Chen 2018            | Y                         | PY          | Y               | Y                       | Y                  | Y                  | Y                           | Y                           | PY                    | N                      | Y                       | Y                     | Y                          | Y                             | Y                    | Y                        | Moderate                  |
| Clari 2020           | Y                         | Y           | Y               | Y                       | Y                  | Y                  | Y                           | Y                           | Y                     | N                      | N/A                     | N/A                   | Y                          | Y                             | N/A                  | Y                        | High                      |
| Eccleston 2019       | Y                         | Y           | Y               | Y                       | Y                  | Y                  | Y                           | Y                           | Y                     | N                      | Y                       | Y                     | Y                          | Y                             | Y                    | Y                        | High                      |
| Fisher 2019          | Y                         | Y           | Y               | Y                       | Y                  | Y                  | Y                           | Y                           | Y                     | N                      | Y                       | Y                     | Y                          | Y                             | Y                    | Y                        | High                      |
| Forbes 2019          | Y                         | Y           | Y               | Y                       | Y                  | Y                  | Y                           | Y                           | Y                     | N                      | N/A                     | N/A                   | Y                          | Y                             | N/A                  | Y                        | High                      |
| Fridriksdottir 2017  | Y                         | PY          | Y               | Y                       | Y                  | Y                  | Y                           | Y                           | Y                     | N                      | N/A                     | N/A                   | Y                          | Y                             | N/A                  | Y                        | Moderate                  |
| Hedman 2012          | Y                         | N           | Y               | Y                       | Y                  | Y                  | Y                           | Y                           | PY                    | N                      | Y                       | Y                     | Y                          | Y                             | Y                    | Y                        | Low                       |
| Kim 2015             | Y                         | PY          | Y               | Y                       | Y                  | Y                  | Y                           | Y                           | Y                     | N                      | Y                       | Y                     | Y                          | Y                             | Y                    | Y                        | Moderate                  |
| Kim 2017             | Y                         | PY          | Y               | Y                       | Y                  | Y                  | Y                           | Y                           | Y                     | N                      | Y                       | Y                     | Y                          | Y                             | Y                    | N                        | Moderate                  |
| Lewis 2018           | Y                         | Y           | Y               | Y                       | Y                  | Y                  | Y                           | Y                           | Y                     | N                      | Y                       | Y                     | Y                          | Y                             | Y                    | Y                        | High                      |
| Lin 2020             | Y                         | PY          | Y               | Y                       | Y                  | Y                  | Y                           | Y                           | Y                     | N                      | N/A                     | N/A                   | Y                          | Y                             | N/A                  | Y                        | Moderate                  |
| Lopez-Rodriguez 2020 | Y                         | Y           | Y               | Y                       | Y                  | Y                  | Y                           | Y                           | Y                     | N                      | N/A                     | N/A                   | Y                          | Y                             | Y                    | Y                        | High                      |
| Mayo-Wilson 2013     | Y                         | Y           | Y               | Y                       | Y                  | Y                  | Y                           | Y                           | Y                     | N                      | Y                       | Y                     | Y                          | Y                             | Y                    | Y                        | High                      |
| McCaughan 2017       | Y                         | Y           | Y               | Y                       | Y                  | Y                  | Y                           | Y                           | Y                     | N                      | Y                       | Y                     | Y                          | Y                             | Y                    | Y                        | High                      |
| McCombie 2015        | Y                         | N           | Y               | Y                       | Y                  | Y                  | Y                           | Y                           | Y                     | N                      | N/A                     | N/A                   | Y                          | Y                             | N/A                  | Y                        | Low                       |
| McGar 2019           | Y                         | PY          | Y               | Y                       | Y                  | Y                  | Y                           | Y                           | PY                    | N                      | N/A                     | N/A                   | Y                          | Y                             | N/A                  | Y                        | Moderate                  |
| Mehta 2019           | Y                         | Y           | Y               | Y                       | Y                  | Y                  | Y                           | Y                           | Y                     | N                      | Y                       | Y                     | Y                          | Y                             | Y                    | Y                        | Moderate                  |
| Mikolasek 2018       | Y                         | PY          | Y               | Y                       | Y                  | Y                  | Y                           | Y                           | Y                     | N                      | N/A                     | N/A                   | Y                          | Y                             | N/A                  | Y                        | Moderate                  |
| Olthuis 2016         | Y                         | Y           | Y               | Y                       | Y                  | Y                  | Y                           | Y                           | Y                     | N                      | Y                       | Y                     | Y                          | Y                             | Y                    | Y                        | Moderate                  |
| Palacios 2017        | Y                         | PY          | Y               | Y                       | Y                  | Y                  | Y                           | Y                           | Y                     | N                      | N/A                     | N/A                   | Y                          | Y                             | N/A                  | Y                        | Moderate                  |
| Paul 2013            | Y                         | PY          | Y               | PY                      | N/A                | N/A                | Y                           | Y                           | PY                    | N                      | N/A                     | N/A                   | Y                          | Y                             | N/A                  | Y                        | Moderate                  |
| Qan'ir 2019          | Y                         | PY          | Y               | Y                       | Y                  | Y                  | Y                           | Y                           | Y                     | N                      | N/A                     | N/A                   | Y                          | Y                             | N/A                  | Y                        | Moderate                  |
| Tang 2018            | Y                         | Y           | Y               | Y                       | Y                  | Y                  | Y                           | Y                           | Y                     | N                      | Y                       | Y                     | Y                          | Y                             | Y                    | Y                        | High                      |
| Toivonen 2017        | Y                         | N           | Y               | Y                       | Y                  | Y                  | Y                           | Y                           | Y                     | N                      | N/A                     | N/A                   | Y                          | Y                             | N/A                  | Y                        | Low                       |
| Ugalde 2017          | Y                         | Y           | Y               | Y                       | Y                  | Y                  | Y                           | Y                           | Y                     | N                      | N/A                     | N/A                   | Y                          | Y                             | N/A                  | Y                        | High                      |
| van Beugen 2014      | Y                         | PY          | Y               | Y                       | Y                  | Y                  | Y                           | Y                           | Y                     | N                      | Y                       | Y                     | Y                          | Y                             | Y                    | Y                        | Moderate                  |
| Vaugts 2018          | Y                         | Y           | Y               | Y                       | Y                  | Y                  | Y                           | Y                           | Y                     | N                      | Y                       | Y                     | Y                          | Y                             | Y                    | Y                        | High                      |
| Wang 2020            | Y                         | Y           | Y               | Y                       | Y                  | Y                  | Y                           | Y                           | Y                     | N                      | Y                       | Y                     | Y                          | Y                             | Y                    | Y                        | High                      |
| Wickersham 2019      | Y                         | Y           | Y               | Y                       | Y                  | Y                  | Y                           | Y                           | Y                     | N                      | N/A                     | N/A                   | Y                          | Y                             | N/A                  | Y                        | High                      |
| Zeng 2019            | Y                         | PY          | Y               | Y                       | Y                  | Y                  | Y                           | Y                           | Y                     | N                      | Y                       | Y                     | Y                          | Y                             | Y                    | Y                        | Moderate                  |

Abbreviations: Y=Yes, N=No, PY=Partial Yes, NA=Not Applicable, H=High, M=Moderate, L=Low, RoB=Risk of Bias.

**Table 4. Studies reporting improvements classified by the type of digital technology used**

|                                           | Chronic diseases cluster                                        |                                          |       | Cancer cluster              |                        |                             | Children and youth cluster |                |       |
|-------------------------------------------|-----------------------------------------------------------------|------------------------------------------|-------|-----------------------------|------------------------|-----------------------------|----------------------------|----------------|-------|
|                                           | Depression                                                      | Anxiety                                  | Other | Depression                  | Anxiety                | Other                       | Depression                 | Anxiety        | Other |
| <b>Web-based interventions</b>            | (23) (42) (43)<br>(16) (36) (31)<br>(14) (40) (33)<br>(34) (37) | (23) (31) (14)<br>(40) (33) (34)<br>(37) | (37)  | (17) (44) (24)<br>(21) (13) | (17) (30) (44)<br>(24) | (17) (24) (21)<br>(41) (13) | (20) (39)                  | (20) (39) (32) | (32)  |
| <b>Patient portal</b>                     |                                                                 |                                          |       |                             | (30)                   |                             |                            |                |       |
| <b>Smart Phone application</b>            | (42) (36) (14)                                                  | (14)                                     |       | (44)                        | (44)                   |                             | (20) (28)                  | (20) (28)      |       |
| <b>Virtual reality</b>                    |                                                                 |                                          |       |                             |                        |                             | (28)                       | (28)           |       |
| <b>Email</b>                              | (42) (43) (36)<br>(14) (40) (33)                                | (14) (40) (33)                           |       | (44) (24) (21)<br>(13)      | (30) (44) (24)         | (24) (21) (13)              |                            |                |       |
| <b>Text message</b>                       | (42) (43) (36)                                                  |                                          |       | (24)                        | (24)                   | (24)                        |                            |                |       |
| <b>Online chat</b>                        | (42) (43) (40)<br>(37)                                          | (40) (37)                                | (37)  | (24) (21)                   | (30) (24)              | (24) (21)                   |                            |                |       |
| <b>Telemedicine/<br/>Teleconsultation</b> | (42) (14)                                                       | (14)                                     |       | (17) (24) (13)              | (17) (24)              | (17) (24) (13)              |                            |                |       |

For peer review only

1  
2  
3 Chronic Disease – Mental Health

4 Final Strategies

5 2020 Jun 11

6  
7  
8 Ovid Multifile

9  
10 Database: Ovid MEDLINE: Epub Ahead of Print, In-Process & Other Non-Indexed Citations, Ovid  
11 MEDLINE® Daily and Ovid MEDLINE® <1946-Present>, Embase Classic+Embase <1947 to 2020 June 10>  
12 Search Strategy:

13 -----  
14 1 exp Chronic Disease/ (463877)  
15 2 ((chronic\* or longterm or long-term or longstanding or long-standing or ongoing or persisten\*) adj2  
16 (comorbid\* or co-morbid\* or condition\* or disabilit\* or disease\* or disorder\* or ill or illness\* or  
17 morbidit\* or syndrom\* or symptom\*)).tw,kf. (817409)  
18 3 1 or 2 [CHRONIC DISEASE - GENERAL] (1148521)  
19 4 exp Arthritis/ (769208)  
20 5 (arthriti\* or arthros#s or osteoarthriti\* or osteo-arthriti\* or osteoarthros#s or osteo-arthros#s or  
21 polyarthriti\* or poly-arthriti\* or spondylarthriti\* or spondyl-arthriti\*).tw,kf. (624493)  
22 6 exp Asthma/ (402927)  
23 7 asthma\*.tw,kf. (397483)  
24 8 Chronic Pain/ (75237)  
25 9 Pain, Intractable/ (9868)  
26 10 ((chronic\* or constant\* or continual\* or continuous\* or ceaseless\* or endless\* or incessant\* or  
27 interminabl\* or intractable or longterm or long-term or nonstop\* or non-stop\* or perpetual\* or persist\*  
28 or recur\* or refractory or sustained or relentless\* or unabat\* or unceasing or unending or uninterrupt\*  
29 or unrelenting or unrelieved or unremit\*) adj3 (neuralgi\* or neuropath\* or pain\*).tw,kf. (240054)  
30 11 exp Neoplasms/ (8206156)  
31 12 (neoplas\* or cancer\* or tumour\* or tumor\* or carcinoma\* or malignan\* or metasta\* or  
32 oncolog\*).tw,kf. (8138150)  
33 13 (adenoma\* or adenocarcinoma\* or adeno-carcinoma\* or blastoma\* or carcinosarcoma\* or carcino-  
34 sarcoma\* or hematoma\* or hepatoblastoma\* or hepato-blastoma\* or leukemia\* or leukaemia\* or  
35 lymphoma\* or melanoma\* or mesenchymoma\* or mesothelioma\* or sarcoma\* or thymoma\*).tw,kf.  
36 (1224311)  
37 14 Renal Insufficiency, Chronic/ (83228)  
38 15 (chronic adj2 (renal or kidney\*) adj3 (condition\* or disease\* or disorder\* or fail\* or  
39 insufficien\*).tw,kf. (202396)  
40 16 (CKD or CKDs).tw,kf. (80295)  
41 17 Diabetes Mellitus/ (704972)  
42 18 Diabetes Mellitus, Type 1/ (112248)  
43 19 Diabetes Mellitus, Type 2/ (196848)  
44 20 Latent Autoimmune Diabetes in Adults/ (376)  
45 21 diabet\*.tw,kf. (1602750)  
46 22 ("Type 1" or "Type I" or "Type 2" or "Type II" or ID or NID) adj DM).tw,kf. (12572)  
47 23 (IDDM or NIDDM).tw,kf. (27091)  
48 24 exp Dyslipidemias/ (150214)  
49 25 (dyslipidemi\* or dyslipoproteinemi\* or dyslipo-proteinemi\* or hyperlipemi\* or hyperlipid?emi\* or  
50 hyper-lipemi\* or hyper-lipid?emi\* or lipemi\* or lipid?emi\* or hypercholester?emi\* or  
51 hypercholester?emi\* or hypertriglyceridemi\* or hyper-triglyceridemi\*).tw,kf. (196503)  
52  
53  
54  
55  
56  
57  
58  
59  
60

26 exp Inflammatory Bowel Diseases/ (238290)  
 27 (inflam\* adj1 (bowel\* or colon\*)).tw,kf. (134937)  
 28 IBD.tw,kf. (77069)  
 29 (Crohn or "Crohn's").tw,kf. (128042)  
 30 (ileitis adj2 (regional or terminal)).tw,kf. (2372)  
 31 (Ileocolitis or ileo-colitis).tw,kf. (1234)  
 32 ((proctocolitis or procto-colitis) adj2 idiopathic).tw,kf. (93)  
 33 ((colorectitis or proctocolitis or procto-colitis) adj2 (ulcer\* or mucosal)).tw,kf. (169)  
 34 colitis gravis.tw,kf. (11)  
 35 exp Pulmonary Disease, Chronic Obstructive/ (189609)  
 36 (chronic adj2 obstructi\* adj3 (pulmonary or airway\* or air way\* or lung or lungs or airflow\* or air  
 37 flow\* or bronchitis or bronchopulmonar\* or broncho-pulmonar\*)).tw,kf. (134589)  
 38 (emphysema? adj3 (pulmonary or airway\* or air way\* or lung or lungs or airflow\* or air flow\* or  
 39 centriacinar or centri-acinar or centrilobular or centri-lobular or panacinar or pan-acinar or panlobular  
 40 or pan-lobular)).tw,kf. (22235)  
 41 (COPD or COAD).tw,kf. (134068)  
 42 exp Cardiovascular Diseases/ (6804416)  
 43 ((artery or arteries or arterial or atrial\* or atrium\* or cardiac\* or cardio\* or cardiovascul\* or cardio-  
 44 vascul\* or coronary or heart\* or myocard\* or ventricle\*) adj3 (arrest\* or aneurysm\* or arrhythmia\* or  
 45 arrythmia\* or disease\* or disorder\* or dysrhythmia\* or dysrhythmia\* or dysfunction\* or failure\* or  
 46 fibrillation\* or ischemi\* or infarction\* or obstruct\* or occlu\* or rupture\* or stenosis or syndrom\* or  
 47 thrombo\* or vasospas\* or vaso-spas\*)).tw,kf. (2646364)  
 48 (arterioscleros\* or arterio-scleros\* or atheroscleros\* or athero-scleros\*).tw,kf. (312159)  
 49 hypertens\*.tw,kf. (1128918)  
 50 ((elevated or high\*) adj2 blood pressure\*).tw,kf. (81424)  
 51 or/4-43 [ITEMIZED CHRONIC DISEASES] (19898982)  
 52 3 or 44 [CHRONIC DISEASES, INCLUDING NAMED CONDITIONS] (20427001)  
 53 ((emotional\* or mental\* or psychological\* or social\*) adj2 health\* adj3 (disorder\* or morbidit\* or  
 54 comorbid\* or co-morbidit\* or problem\*)).tw,kf. (48561)  
 55 Mood Disorders/ (26170)  
 56 ((affective or mood) adj disorder?).tw,kf. (80447)  
 57 Cyclothymic Disorder/ (1679)  
 58 ((cyclothymic or cyclo-thymic) adj (disorder? or personalit\*)).tw,kf. (283)  
 59 exp Anxiety Disorders/ (324405)  
 60 exp Anxiety/ (303024)  
 61 (anxiety or anxieties or anxious\*).tw,kf. (489510)  
 62 GAD.tw,kf. (22867)  
 63 (hypervigilan\* or hyper-vigilan\* or nervous\*).tw,kf. (722745)  
 64 ((incessan\* or obsessive\* or persistan\* or intense\*) adj3 fear\*).tw,kf. (1060)  
 65 (agoraphobi\* or claustrophobi\* or homophobi\* or neophobi\* or xenophobi\*).tw,kf. (14836)  
 66 (neurocirculatory asthenia\* or cardiac neurosis or effort syndrome\* or hyperkinetic heart  
 67 syndrome\*).tw,kf. (1377)  
 68 (neurotic disorder\* or neurosis or psychoneurosis or psycho-neurosis).tw,kf. (25227)  
 69 (obsessive-compulsive or anankastic personalit\* or compulsive personalit\* or obsessive personalit\*  
 70 or hoarding or psychastheni\*).tw,kf. (44492)  
 71 (panic disorder\* or (panic adj2 attack\*)).tw,kf. (25995)  
 72 (phobia or phobias or phobic).tw,kf. (27494)  
 73 (catastrophization? or catastrophise\* or catastrophising).tw,kf. (8601)

64 Attention Deficit Disorder with Hyperactivity/ (49515)  
 65 attention deficit\*.tw,kf. (67522)  
 66 (ADDH or ADHD).tw,kf. (61164)  
 67 ((hyperkinetic or hyper-kinetic) adj syndrome?).tw,kf. (891)  
 68 exp Depressive Disorder/ (590789)  
 69 Depression/ (488522)  
 70 depress\*.tw,kf. (1107871)  
 71 dysthym\*.tw,kf. (7359)  
 72 (feel\* blue or blues).tw,kf. (4041)  
 73 melanchol\*.tw,kf. (7378)  
 74 (MDD and mental).tw,kf. (4373)  
 75 Stress Disorders, Traumatic/ (37504)  
 76 Stress Disorders, Post-Traumatic/ (52151)  
 77 PTSD.tw,kf. (56027)  
 78 (stress disorder? adj3 (trauma\* or posttrauma\* or post-trauma\*)).tw,kf. (65507)  
 79 (neuros#s adj3 (trauma\* or posttrauma\* or post-trauma\*)).tw,kf. (723)  
 80 or/46-79 [MENTAL/MOOD DISORDERS - GENERAL AND NAMED] (2618889)  
 81 45 and 80 [CHRONIC DISEASE & MENTAL HEALTH PROBLEMS] (700259)  
 82 Computer Communication Networks/ (27176)  
 83 Local Area Networks/ (1636)  
 84 Internet/ (180650)  
 85 Internet-Based Intervention/ (311)  
 86 ((internet or online or web or web-based or web-site or website or www or cyber\* or smartphone\*  
 or smart phone\* or iphone\* or i-phone\* or ipad or i-pad or ipads or i-pads) adj3 (care or deliver\* or  
 healthcare or health care or consult\* or counsel\* or interven\* or monitor\* or psychiatr\* or rehab\* or  
 service? or treat\* or therap\*)).tw,kf. (47403)  
 87 Smartphone/ (16414)  
 88 ((internet or online or web or web-based or web-site or website or www or cyber\* or smartphone\*  
 or smart phone\* or iphone\* or i-phone\* or ipad or i-pad or ipads or i-pads) adj3 (app or apps or  
 application?)).tw,kf. (24259)  
 89 (mobile adj3 (app or apps or application?)).tw,kf. (14699)  
 90 (digital\* adj3 (care or healthcare or health care or interven\* or consult\* or counsel\* or monitor\* or  
 psychiatr\* or rehab\* or treat\* or therap\*)).tw,kf. (12470)  
 91 ((technology-based or technology-facilitated) adj3 (care or healthcare or health care or interven\*  
 or consult\* or counsel\* or monitor\* or psychiatr\* or rehab\* or treat\* or therap\*)).tw,kf. (1460)  
 92 (video\* adj3 (care or healthcare or health care or interven\* or consult\* or counsel\* or monitor\* or  
 psychiatr\* or rehab\* or treat\* or therap\*)).tw,kf. (21536)  
 93 (virtual\* adj3 (care or healthcare or health care or interven\* or consult\* or counsel\* or monitor\* or  
 psychiatr\* or rehab\* or treat\* or therap\*)).tw,kf. (8491)  
 94 Patient Portals/ (182923)  
 95 (patient? adj2 (portal or portals)).tw,kf. (11947)  
 96 ((health information or medical information or clinical information) adj3 (portal or portals)).tw,kf.  
 (155)  
 97 ((health data or medical data or clinical data) adj3 (portal or portals)).tw,kf. (67)  
 98 health portal?.tw,kf. (314)  
 99 Electronic Mail/ (24709)  
 100 (electronic mail\* or email\* or e-mail\*).tw,kf. (51152)  
 101 exp Telephone/ (60582)



- 1  
2  
3 102 (telephon\* or tele-phon\* or phone or phoned or phones or phoning or answering service? or  
4 telefacsimile\* or tele-facsimile\* or FAX).tw,kf. (209278)  
5  
6 103 exp Television/ (49238)  
7 104 (televis\* or tele-vis\* or TV or TVs or videorecord\* or video-record\* or videotap\* or video  
8 tap\*).tw,kf. (116545)  
9 105 Videoconferencing/ (5321)  
10 106 (videoconferenc\* or video-conference\* or videophon\* or video-phon\*).tw,kf. (6099)  
11 107 Electronic Health Records/ (34655)  
12 108 electronic health record?.tw,kf. (37890)  
13 109 (EHR or EHRs or EMR or EMRs or PHR or PHRs).tw,kf. (46151)  
14 110 Hotlines/ (3062)  
15 111 hotline?.tw,kf. (2749)  
16 112 Telecommunications/ (30245)  
17 113 (telecommunicat\* or tele-communicat\*).tw,kf. (8599)  
18 114 exp Telemedicine/ (67951)  
19 115 Telenursing/ (487)  
20 116 (ehealth or e-health or mhealth or m-health or mobile health).tw,kf. (23436)  
21 117 (telecare or tele-care or teleconsult\* or tele-consult\* or telecounsel\* or tele-counsel\* or  
22 telehome\* or tele-home\* or telemed\* or tele-med\* or telemonitor\* or tele-monitor\* or telenurs\* or  
23 tele-nurs\* or telepsychiatr\* or tele-psychiatr\* or telerehab\* or tele-rehab\*).tw,kf. (37038)  
24 118 (remote\$2 adj3 (care or healthcare or health care or consult\* or counsel\* or interven\* or  
25 monitor\* or psychiatr\* or rehab\* or treat\* or therap\*).tw,kf. (17186)  
26 119 or/82-118 [DIGITAL HEALTH TECHNOLOGIES] (1032076)  
27 120 81 and 119 [CHRONIC DISEASE & MENTAL HEALTH PROBLEMS - DIGITAL HEALTH TECHNOLOGIES]  
28 (18971)  
29 121 Systematic Review.pt. (128913)  
30 122 exp Systematic Reviews as Topic/ (28375)  
31 123 Meta Analysis.pt. (115626)  
32 124 exp Meta-Analysis as Topic/ (61507)  
33 125 (meta-analy\* or metanaly\* or metaanaly\* or met analy\* or integrative research or integrative  
34 review\* or integrative overview\* or research integration or research overview\* or collaborative  
35 review\*).tw,kf. (411235)  
36 126 (systematic review\* or systematic overview\* or evidence-based review\* or evidence-based  
37 overview\* or (evidence adj3 (review\* or overview\*)) or meta-review\* or meta-overview\* or meta-  
38 synthes\* or rapid review\* or "review of reviews" or umbrella review? or technology assessment\* or HTA  
39 or HTAs).tw,kf. (492109)  
40 127 exp Technology Assessment, Biomedical/ (25470)  
41 128 (cochrane or health technology assessment or evidence report or systematic reviews).jw. (47503)  
42 129 (network adj (MA or MAs)).tw,kf. (30)  
43 130 (NMA or NMAs or MTC or MTCs or MAIC or MAICs).tw,kf. (17980)  
44 131 indirect\* compar\*.tw,kf. (5582)  
45 132 (indirect treatment\* adj1 compar\*).tw,kf. (910)  
46 133 (mixed treatment\* adj1 compar\*).tw,kf. (1327)  
47 134 (multiple treatment\* adj1 compar\*).tw,kf. (387)  
48 135 (multi-treatment\* adj1 compar\*).tw,kf. (8)  
49 136 simultaneous\* compar\*.tw,kf. (2407)  
50 137 mixed comparison?.tw,kf. (73)  
51 138 or/121-137 [REVIEWS] (850383)  
52  
53  
54  
55  
56  
57  
58  
59  
60

1  
2  
3 139 120 and 138 [REVIEWS - CHRONIC DISEASE & MENTAL HEALTH PROBLEMS - DIGITAL HEALTH  
4 TECHNOLOGIES] (638)  
5 140 exp Animals/ not Humans/ (17305531)  
6 141 139 not 140 [ANIMAL-ONLY REMOVED] (431)  
7 142 limit 141 to yr="2010-current" (370)  
8 143 142 use ppez [MEDLINE RECORDS] (178)  
9 144 exp chronic disease/ (463877)  
10 145 ((chronic\* or longterm or long-term or longstanding or long-standing or ongoing or persisten\*)  
11 adj2 (comorbid\* or co-morbid\* or condition\* or disabilit\* or disease\* or disorder\* or ill or illness\* or  
12 morbidit\* or syndrom\* or symptom\*)).tw,kw. (822925)  
13 146 144 or 145 [CHRONIC DISEASE - GENERAL] (1153511)  
14 147 exp arthritis/ (769208)  
15 148 (arthriti\* or arthros#s or osteoarthriti\* or osteo-arthriti\* or osteoarthros#s or osteo-arthros#s or  
16 polyarthriti\* or poly-arthriti\* or spondylarthriti\* or spondyl-arthriti\*).tw,kw. (631277)  
17 149 exp asthma/ (402927)  
18 150 asthma\*.tw,kw. (402449)  
19 151 chronic pain/ (75237)  
20 152 intractable pain/ (11527)  
21 153 ((chronic\* or constant\* or continual\* or continuous\* or ceaseless\* or endless\* or incessant\* or  
22 interminabl\* or intractable or longterm or long-term or nonstop\* or non-stop\* or perpetual\* or persist\*  
23 or recur\* or refractory or sustained or relentless\* or unabat\* or unceasing or unending or uninterrupt\*  
24 or unrelenting or unrelieved or unremit\*) adj3 (neuralgi\* or neuropath\* or pain\*)).tw,kw. (242272)  
25 154 exp malignant neoplasm/ (6996129)  
26 155 (neoplas\* or cancer\* or tumour\* or tumor\* or carcinoma\* or malignan\* or metasta\* or  
27 oncolog\*).tw,kw. (8161179)  
28 156 (adenoma\* or adenocarcinoma\* or adeno-carcinoma\* or blastoma\* or carcinosarcoma\* or  
29 carcino-sarcoma\* or hematoma\* or hepatoblastoma\* or hepato-blastoma\* or leukemia\* or leukaemia\*  
30 or lymphoma\* or melanoma\* or mesenchymoma\* or mesothelioma\* or sarcoma\* or thymoma\*).tw,kw.  
31 (1236437)  
32 157 exp chronic kidney failure/ (193963)  
33 158 (chronic adj2 (renal or kidney\*) adj3 (condition\* or disease\* or disorder\* or fail\* or  
34 insufficien\*).tw,kw. (205098)  
35 159 (CKD or CKDs).tw,kw. (80787)  
36 160 diabetes mellitus/ (704972)  
37 161 exp insulin dependent diabetes mellitus/ (191892)  
38 162 non insulin dependent diabetes mellitus/ (385694)  
39 163 latent autoimmune diabetes in adults/ (376)  
40 164 diabet\*.tw,kw. (1614950)  
41 165 (("Type 1" or "Type I" or "Type 2" or "Type II" or ID or NID) adj DM).tw,kw. (12646)  
42 166 (IDDM or NIDDM).tw,kw. (27515)  
43 167 dyslipidemia/ (82310)  
44 168 (dyslipidemi\* or dyslipoproteinemi\* or dyslipo-proteinemi\* or hyperlipemi\* or hyperlipid?emi\* or  
45 hyper-lipemi\* or hyper-lipid?emi\* or lipemi\* or lipid?emi\* or hypercholester?emi\* or  
46 hypercholester?emi\* or hypertriglyceridemi\* or hyper-triglyceridemi\*).tw,kw. (200456)  
47 169 exp inflammatory bowel disease/ (238290)  
48 170 (inflam\* adj1 (bowel\* or colon\*)).tw,kw. (137715)  
49 171 IBD.tw,kw. (78120)  
50 172 (Crohn or "Crohn's").tw,kw. (129757)  
51  
52  
53  
54  
55  
56  
57  
58  
59  
60

- 1  
2  
3 173 (ileitis adj2 (regional or terminal)).tw,kw. (1952)  
4 174 (ileocolitis or ileo-colitis).tw,kw. (1242)  
5 175 ((proctocolitis or procto-colitis) adj2 idiopathic).tw,kw. (93)  
6 176 ((colorectitis or proctocolitis or procto-colitis) adj2 (ulcer\* or mucosal)).tw,kw. (171)  
7 177 colitis gravis.tw,kw. (11)  
8 178 chronic obstructive lung disease/ (173601)  
9 179 (chronic adj2 obstructi\* adj3 (pulmonary or airway\* or air way\* or lung or lungs or airflow\* or air  
10 flow\* or bronchitis or bronchopulmonar\* or broncho-pulmonar\*)).tw,kw. (136000)  
11 180 (emphysema? adj3 (pulmonary or airway\* or air way\* or lung or lungs or airflow\* or air flow\* or  
12 centriacinar or centri-acinar or centrilobular or centri-lobular or panacinar or pan-acinar or panlobular  
13 or pan-lobular)).tw,kw. (21052)  
14 181 (COPD or COAD).tw,kw. (136003)  
15 182 exp cardiovascular disease/ (6804416)  
16 183 ((artery or arteries or arterial or atrial\* or atrium\* or cardiac\* or cardio\* or cardiovascul\* or  
17 cardio-vascul\* or coronary or heart\* or myocard\* or ventricle\*) adj3 (arrest\* or aneurysm\* or  
18 arrhythmia\* or arrythmia\* or disease\* or disorder\* or dysrhythmia\* or dysrhythmia\* or dysfunction\* or  
19 failure\* or fibrillation\* or ischemi\* or infarction\* or obstruct\* or occlu\* or rupture\* or stenosis or  
20 syndrom\* or thrombo\* or vasospas\* or vaso-spas\*)).tw,kw. (2662750)  
21 184 (arterioscleros\* or arterio-scleros\* or atheroscleros\* or athero-scleros\*).tw,kw. (331070)  
22 185 hypertens\*.tw,kw. (1143312)  
23 186 ((elevated or high\*) adj2 blood pressure\*).tw,kw. (80499)  
24 187 or/147-186 [ITEMIZED CHRONIC DISEASES] (19642008)  
25 188 146 or 187 [CHRONIC DISEASES, INCLUDING NAMED CONDITIONS] (20175048)  
26 189 ((emotional\* or mental\* or psychological\* or social\*) adj2 health\* adj3 (disorder\* or morbidit\* or  
27 comorbid\* or co-morbidit\* or problem\*)).tw,kw. (48743)  
28 190 exp mood disorder/ (647316)  
29 191 ((affective or mood) adj disorder?).tw,kw. (82561)  
30 192 cyclothymia/ (1041)  
31 193 ((cyclothymic or cyclo-thymic) adj (disorder? or personalit\*)).tw,kw. (289)  
32 194 exp anxiety disorder/ (324405)  
33 195 exp anxiety/ (303024)  
34 196 (anxiety or anxieties or anxious\*).tw,kw. (494827)  
35 197 GAD.tw,kw. (23192)  
36 198 (hypervigilan\* or hyper-vigilan\* or nervous\*).tw,kw. (733406)  
37 199 ((incessan\* or obsessive\* or persistan\* or intense\*) adj3 fear\*).tw,kw. (1083)  
38 200 (agoraphobi\* or claustrophobi\* or homophobi\* or neophobi\* or xenophobi\*).tw,kw. (15157)  
39 201 (neurocirculatory asthenia\* or cardiac neurosis or effort syndrome\* or hyperkinetic heart  
40 syndrome\*).tw,kw. (1416)  
41 202 (neurotic disorder\* or neurosis or psychoneurosis or psycho-neurosis).tw,kw. (24072)  
42 203 (obsessive-compulsive or anankastic personalit\* or compulsive personalit\* or obsessive  
43 personalit\* or hoarding or psychastheni\*).tw,kw. (44330)  
44 204 (panic disorder\* or (panic adj2 attack\*)).tw,kw. (26305)  
45 205 (phobia or phobias or phobic).tw,kw. (28151)  
46 206 (catastrophization? or catastrophie\* or catastrophising).tw,kw. (8668)  
47 207 attention deficit disorder/ (89404)  
48 208 attention deficit\*.tw,kw. (68677)  
49 209 (ADDH or ADHD).tw,kw. (62185)  
50 210 ((hyperkinetic or hyper-kinetic) adj syndrome?).tw,kw. (905)  
51  
52  
53  
54  
55  
56  
57  
58  
59

- 1  
2  
3 211 exp depression/ (600183)  
4 212 depress\*.tw,kw. (1116521)  
5 213 dysthym\*.tw,kw. (7464)  
6 214 (feel\* blue or blues).tw,kw. (4061)  
7 215 melanchol\*.tw,kw. (7472)  
8 216 (MDD and mental).tw,kw. (4396)  
9 217 PTSD.tw,kw. (57477)  
10 218 (stress disorder? adj3 (trauma\* or posttrauma\* or post-trauma\*)).tw,kw. (66525)  
11 219 (neuros#s adj3 (trauma\* or posttrauma\* or post-trauma\*)).tw,kw. (690)  
12 220 or/189-219 [MENTAL/MOOD DISORDERS - GENERAL AND NAMED] (2651384)  
13 221 188 and 220 [CHRONIC DISEASE & MENTAL HEALTH PROBLEMS] (708973)  
14 222 exp computer network/ (106780)  
15 223 internet/ (180650)  
16 224 web-based intervention/ (352)  
17 225 smartphone/ (16414)  
18 226 ((internet or online or web or web-based or web-site or website or www or cyber\* or  
19 smartphone\* or smart phone\* or iphone\* or i-phone\* or ipad or i-pad or ipads or i-pads) adj3 (care or  
20 deliver\* or healthcare or health care or consult\* or counsel\* or interven\* or monitor\* or psychiatr\* or  
21 rehab\* or service? or treat\* or therap\*)).tw,kw. (47924)  
22 227 ((internet or online or web or web-based or web-site or website or www or cyber\* or  
23 smartphone\* or smart phone\* or iphone\* or i-phone\* or ipad or i-pad or ipads or i-pads) adj3 (app or  
24 apps or application?)).tw,kw. (24398)  
25 228 (mobile adj3 (app or apps or application?)).tw,kw. (14549)  
26 229 ((technology-based or technology-facilitated) adj3 (care or healthcare or health care or interven\*  
27 or consult\* or counsel\* or monitor\* or psychiatr\* or rehab\* or treat\* or therap\*)).tw,kw. (1464)  
28 230 (digital\* adj3 (care or healthcare or health care or interven\* or consult\* or counsel\* or monitor\*  
29 or psychiatr\* or rehab\* or treat\* or therap\*)).tw,kw. (12381)  
30 231 (video\* adj3 (care or healthcare or health care or interven\* or consult\* or counsel\* or monitor\*  
31 or psychiatr\* or rehab\* or treat\* or therap\*)).tw,kw. (21785)  
32 232 (virtual\* adj3 (care or healthcare or health care or interven\* or consult\* or counsel\* or monitor\*  
33 or psychiatr\* or rehab\* or treat\* or therap\*)).tw,kw. (8752)  
34 233 (patient? adj2 (portal or portals)).tw,kw. (11948)  
35 234 ((health information or medical information or clinical information) adj3 (portal or  
36 portals)).tw,kw. (156)  
37 235 ((health data or medical data or clinical data) adj3 (portal or portals)).tw,kw. (67)  
38 236 health portal?.tw,kw. (322)  
39 237 e-mail/ (24709)  
40 238 (electronic mail\* or email\* or e-mail\*).tw,kw. (51262)  
41 239 telephone/ (50014)  
42 240 (telephon\* or tele-phon\* or phone or phoned or phones or phoning or answering service? or  
43 telefacsimile\* or tele-facsimile\* or FAX).tw,kw. (209337)  
44 241 television/ (30885)  
45 242 (televis\* or tele-vis\* or TV or TVs or videorecord\* or video-record\* or videotap\* or video  
46 tap\*).tw,kw. (116882)  
47 243 videoconferencing/ (5321)  
48 244 (videoconferenc\* or video-conference\* or videophon\* or video-phon\*).tw,kw. (6193)  
49 245 electronic health record/ (35864)  
50 246 electronic health record?.tw,kw. (39303)  
51  
52  
53  
54  
55  
56  
57  
58  
59  
60

247 electronic medical record/ (74370)  
 248 electronic patient record/ (2304)  
 249 (EHR or EHRs or EMR or EMRs or PHR or PHRs).tw,kw. (46430)  
 250 hotline/ (3071)  
 251 hotline?.tw,kw. (2776)  
 252 telecommunication/ (30245)  
 253 (telecommunicat\* or tele-communicat\*).tw,kw. (8768)  
 254 exp Telemedicine/ (67951)  
 255 (ehealth or e-health or mhealth or m-health or mobile health).tw,kw. (26439)  
 256 (telecare or tele-care or teleconsult\* or tele-consult\* or telecounsel\* or tele-counsel\* or  
 257 telehome\* or tele-home\* or telemed\* or tele-med\* or telemonitor\* or tele-monitor\* or telenurs\* or  
 258 tele-nurs\* or telepsychiatr\* or tele-psychiatr\* or telerehab\* or tele-rehab\*).tw,kw. (40112)  
 259 (remote\$2 adj3 (care or healthcare or health care or consult\* or counsel\* or interven\* or  
 260 monitor\* or psychiatr\* or rehab\* or treat\* or therap\*).tw,kw. (17322)  
 261 or/222-257 [DIGITAL HEALTH TECHNOLOGIES] (895464)  
 262 221 and 258 [CHRONIC DISEASE & MENTAL HEALTH PROBLEMS - DIGITAL HEALTH  
 263 TECHNOLOGIES] (16694)  
 264 "systematic review"/ (377591)  
 265 "systematic review (topic)"/ (24955)  
 266 meta-analysis/ (304555)  
 267 "meta analysis (topic)"/ (42125)  
 268 (meta-analy\* or metanaly\* or metaanaly\* or met analy\* or integrative research or integrative  
 269 review\* or integrative overview\* or research integration or research overview\* or collaborative  
 270 review\*).tw,kw. (414401)  
 271 (systematic review\* or systematic overview\* or evidence-based review\* or evidence-based  
 272 overview\* or (evidence adj3 (review\* or overview\*)) or meta-review\* or meta-overview\* or meta-  
 273 synthes\* or rapid review\* or "review of reviews" or umbrella review? or technology assessment\* or HTA  
 274 or HTAs).tw,kw. (495920)  
 275 biomedical technology assessment/ (24358)  
 276 (cochrane or health technology assessment or evidence report or systematic reviews).jw. (47503)  
 277 (network adj (MA or MAs)).tw,kw. (30)  
 278 (NMA or NMAs or MTC or MTCs or MAIC or MAICs).tw,kw. (18036)  
 279 indirect\* compar\*.tw,kw. (5663)  
 280 (indirect treatment\* adj1 compar\*).tw,kw. (915)  
 281 (mixed treatment\* adj1 compar\*).tw,kw. (1349)  
 282 (multiple treatment\* adj1 compar\*).tw,kw. (394)  
 283 (multi-treatment\* adj1 compar\*).tw,kw. (8)  
 284 simultaneous\* compar\*.tw,kw. (2407)  
 285 mixed comparison?.tw,kw. (74)  
 286 or/260-276 [REVIEWS] (926988)  
 287 259 and 277 [REVIEWS - CHRONIC DISEASE & MENTAL HEALTH PROBLEMS - DIGITAL HEALTH  
 288 TECHNOLOGIES] (713)  
 289 exp animal/ or exp animal experimentation/ or exp animal model/ or exp animal experiment/ or  
 290 nonhuman/ or exp vertebrate/ (52856473)  
 291 exp human/ or exp human experimentation/ or exp human experiment/ (40867893)  
 292 279 not 280 (11990325)  
 293 282 278 not 281 [ANIMAL-ONLY REMOVED] (711)  
 294 283 limit 282 to yr="2010-current" (636)

1  
2  
3 284 283 use emczd [EMBASE RECORDS] (463)  
4 285 143 or 284 [BOTH DATABASES] (641)  
5 286 remove duplicates from 285 (489) [TOTAL UNIQUE RECORDS]  
6 287 286 use ppez [MEDLINE UNIQUE RECORDS] (175)  
7 288 286 use emczd [EMBASE UNIQUE RECORDS] (314)  
8  
9

10 \*\*\*\*\*

11 Cochrane Library

12  
13 Database: EBM Reviews - Cochrane Database of Systematic Reviews <2005 to June 03, 2020>, EBM  
14 Reviews - Database of Abstracts of Reviews of Effects <1st Quarter 2016>, EBM Reviews - Health  
15 Technology Assessment <4th Quarter 2016>

16 Search Strategy:

17 -----  
18  
19 1 exp Chronic Disease/ (166)  
20 2 ((chronic\* or longterm or long-term or longstanding or long-standing or ongoing or persisten\*) adj2  
21 (comorbid\* or co-morbid\* or condition\* or disabilit\* or disease\* or disorder\* or ill or illness\* or  
22 morbidit\* or syndrom\* or symptom\*)).ti,ab,kw,tw. (5947)  
23 3 1 or 2 [CHRONIC DISEASE - GENERAL] (5947)  
24 4 exp Arthritis/ (253)  
25 5 (arthriti\* or arthros#s or osteoarthriti\* or osteo-arthritis\* or osteoarthros#s or osteo-arthros#s or  
26 polyarthriti\* or poly-arthritis\* or spondylarthriti\* or spondyl-arthritis\*).ti,ab,kw,tw. (2243)  
27 6 exp Asthma/ (105)  
28 7 asthma\*.ti,ab,kw,tw. (1488)  
29 8 Chronic Pain/ (24)  
30 9 Pain, Intractable/ (11)  
31 10 ((chronic\* or constant\* or continual\* or continuous\* or ceaseless\* or endless\* or incessant\* or  
32 interminabl\* or intractable or longterm or long-term or nonstop\* or non-stop\* or perpetual\* or persist\*  
33 or recur\* or refractory or sustained or relentless\* or unabat\* or unceasing or unending or uninterrupt\*  
34 or unrelenting or unrelieved or unremit\*) adj3 (neuralgi\* or neuropath\* or pain\*).ti,ab,kw,tw. (1912)  
35 11 exp Neoplasms/ (2532)  
36 12 (neoplas\* or cancer\* or tumour\* or tumor\* or carcinoma\* or malignan\* or metasta\* or  
37 oncolog\*).ti,ab,kw,tw. (13669)  
38 13 (adenoma\* or adenocarcinoma\* or adeno-carcinoma\* or blastoma\* or carcinosarcoma\* or carcino-  
39 sarcoma\* or hematoma\* or hepatoblastoma\* or hepato-blastoma\* or leukemia\* or leukaemia\* or  
40 lymphoma\* or melanoma\* or mesenchymoma\* or mesothelioma\* or sarcoma\* or  
41 thymoma\*).ti,ab,kw,tw. (1492)  
42 14 Renal Insufficiency, Chronic/ (13)  
43 15 (chronic adj2 (renal or kidney\*) adj3 (condition\* or disease\* or disorder\* or fail\* or  
44 insufficien\*).ti,ab,kw,tw. (764)  
45 16 (CKD or CKDs).ti,ab,kw,tw. (158)  
46 17 Diabetes Mellitus/ (137)  
47 18 Diabetes Mellitus, Type 1/ (65)  
48 19 Diabetes Mellitus, Type 2/ (118)  
49 20 Latent Autoimmune Diabetes in Adults/ (0)  
50 21 diabet\*.ti,ab,kw,tw. (5061)  
51 22 (["Type 1" or "Type I" or "Type 2" or "Type II" or ID or NID] adj DM).ti,ab,kw,tw. (19)  
52 23 (IDDM or NIDDM).ti,ab,kw,tw. (37)  
53  
54  
55  
56  
57  
58  
59  
60



- 1  
2  
3 24 exp Dyslipidemias/ (35)  
4 25 (dyslipidemi\* or dyslipoproteinemi\* or dyslipo-proteinemi\* or hyperlipemi\* or hyperlipid?emi\* or  
5 hyper-lipemi\* or hyper-lipid?emi\* or lipemi\* or lipid?emi\* or hypercholester?emi\* or  
6 hypercholester?emi\* or hypertriglyceridemi\* or hyper-triglyceridemi\*).ti,ab,kw,tw. (469)  
7 26 exp Inflammatory Bowel Diseases/ (62)  
8 27 (inflam\* adj1 (bowel\* or colon\*).ti,ab,kw,tw. (424)  
9 28 IBD.ti,ab,kw,tw. (180)  
10 29 (Crohn or "Crohn's").ti,ab,kw,tw. (422)  
11 30 (ileitis adj2 (regional or terminal)).ti,ab,kw,tw. (5)  
12 31 (Ileocolitis or ileo-colitis).ti,ab,kw,tw. (10)  
13 32 ((proctocolitis or procto-colitis) adj2 idiopathic).ti,ab,kw,tw. (0)  
14 33 ((colorectitis or proctocolitis or procto-colitis) adj2 (ulcer\* or mucosal)).ti,ab,kw,tw. (9)  
15 34 colitis gravis.ti,ab,kw,tw. (1)  
16 35 exp Pulmonary Disease, Chronic Obstructive/ (112)  
17 36 (chronic adj2 obstructi\* adj3 (pulmonary or airway\* or air way\* or lung or lungs or airflow\* or air  
18 flow\* or bronchitis or bronchopulmonar\* or broncho-pulmonar\*).ti,ab,kw,tw. (1020)  
19 37 (emphysema? adj3 (pulmonary or airway\* or air way\* or lung or lungs or airflow\* or air flow\* or  
20 centriacinar or centri-acinar or centrilobular or centri-lobular or panacinar or pan-acinar or panlobular  
21 or pan-lobular)).ti,ab,kw,tw. (120)  
22 38 (COPD or COAD).ti,ab,kw,tw. (658)  
23 39 exp Cardiovascular Diseases/ (1432)  
24 40 ((artery or arteries or arterial or atrial\* or atrium\* or cardiac\* or cardio\* or cardiovascul\* or cardio-  
25 vascul\* or coronary or heart\* or myocard\* or ventricle\*) adj3 (arrest\* or aneurysm\* or arrhythmia\* or  
26 arrhythmia\* or disease\* or disorder\* or dysrhythmia\* or dysrhythmia\* or dysfunction\* or failure\* or  
27 fibrillation\* or ischemi\* or infarction\* or obstruct\* or occlu\* or rupture\* or stenosis or syndrom\* or  
28 thrombo\* or vasospas\* or vaso-spas\*).ti,ab,kw,tw. (8162)  
29 41 (arterioscleros\* or arterio-scleros\* or atheroscleros\* or athero-scleros\*).ti,ab,kw,tw. (424)  
30 42 hypertens\*.ti,ab,kw,tw. (3258)  
31 43 ((elevated or high\*) adj2 blood pressure\*).ti,ab,kw,tw. (556)  
32 44 or/4-43 [ITEMIZED CHRONIC DISEASES] (28740)  
33 45 3 or 44 [CHRONIC DISEASES, INCLUDING NAMED CONDITIONS] (30275)  
34 46 ((emotional\* or mental\* or psychological\* or social\*) adj2 health\* adj3 (disorder\* or morbidit\* or  
35 comorbid\* or co-morbidit\* or problem\*).ti,ab,kw,tw. (502)  
36 47 Mood Disorders/ (11)  
37 48 ((affective or mood) adj disorder?).ti,ab,kw,tw. (594)  
38 49 Cyclothymic Disorder/ (0)  
39 50 ((cyclothymic or cyclo-thymic) adj (disorder? or personalit\*).ti,ab,kw,tw. (64)  
40 51 exp Anxiety Disorders/ (70)  
41 52 exp Anxiety/ (22)  
42 53 (anxiety or anxieties or anxious\*).ti,ab,kw,tw. (3119)  
43 54 GAD.ti,ab,kw,tw. (86)  
44 55 (hypervigilan\* or hyper-vigilan\* or nervous\*).ti,ab,kw,tw. (1930)  
45 56 ((incessan\* or obsessive\* or persistan\* or intense\*) adj3 fear\*).ti,ab,kw,tw. (14)  
46 57 (agoraphobi\* or claustrophobi\* or homophobi\* or neophobi\* or xenophobi\*).ti,ab,kw,tw. (184)  
47 58 (neurocirculatory asthenia\* or cardiac neurosis or effort syndrome\* or hyperkinetic heart  
48 syndrome\*).ti,ab,kw,tw. (60)  
49 59 (neurotic disorder\* or neurosis or psychoneurosis or psycho-neurosis).ti,ab,kw,tw. (321)  
50  
51  
52  
53  
54  
55  
56  
57  
58  
59

- 1  
2  
3 60 (obsessive-compulsive or anankastic personalit\* or compulsive personalit\* or obsessive personalit\*  
4 or hoarding or psychastheni\*).ti,ab,kw,tw. (280)  
5 61 (panic disorder\* or (panic adj2 attack\*)).ti,ab,kw,tw. (239)  
6 62 (phobia or phobias or phobic).ti,ab,kw,tw. (282)  
7 63 (catastroph#ation? or catastroph#e\* or catastroph#ing).ti,ab,kw,tw. (35)  
8 64 Attention Deficit Disorder with Hyperactivity/ (54)  
9 65 Attention Deficit Disorder with Hyperactivity/ (54)  
10 66 (ADDH or ADHD).ti,ab,kw,tw. (223)  
11 67 ((hyperkinetic or hyper-kinetic) adj syndrome?).ti,ab,kw,tw. (3)  
12 68 exp Depressive Disorder/ (97)  
13 69 Depression/ (73)  
14 70 depress\*.ti,ab,kw,tw. (4605)  
15 71 dysthym\*.ti,ab,kw,tw. (220)  
16 72 (feel\* blue or blues).ti,ab,kw,tw. (28)  
17 73 melanchol\*.ti,ab,kw,tw. (44)  
18 74 (MDD and mental).ti,ab,kw,tw. (54)  
19 75 Stress Disorders, Traumatic/ (2)  
20 76 Stress Disorders, Post-Traumatic/ (28)  
21 77 PTSD.ti,ab,kw,tw. (211)  
22 78 (stress disorder? adj3 (trauma\* or posttrauma\* or post-trauma\*)).ti,ab,kw,tw. (395)  
23 79 (neuros#s adj3 (trauma\* or posttrauma\* or post-trauma\*)).ti,ab,kw,tw. (9)  
24 80 or/46-79 [MENTAL/MOOD DISORDERS - GENERAL AND NAMED] (7124)  
25 81 45 and 80 [CHRONIC DISEASE & MENTAL HEALTH PROBLEMS] (4063)  
26 82 Computer Communication Networks/ (7)  
27 83 Local Area Networks/ (0)  
28 84 Internet/ (27)  
29 85 Internet-Based Intervention/ (0)  
30 86 ((internet or online or web or web-based or web-site or website or www or cyber\* or smartphone\*  
31 or smart phone\* or iphone\* or i-phone\* or ipad or i-pad or ipads or i-pads) adj3 (care or deliver\* or  
32 healthcare or health care or consult\* or counsel\* or interven\* or monitor\* or psychiatr\* or rehab\* or  
33 service? or treat\* or therap\*)).ti,ab,kw,tw. (592)  
34 87 Smartphone/ (0)  
35 88 ((internet or online or web or web-based or web-site or website or www or cyber\* or smartphone\*  
36 or smart phone\* or iphone\* or i-phone\* or ipad or i-pad or ipads or i-pads) adj3 (app or apps or  
37 application?)).ti,ab,kw,tw. (108)  
38 89 (mobile adj3 (app or apps or application?)).ti,ab,kw,tw. (81)  
39 90 (digital\* adj3 (care or healthcare or health care or interven\* or consult\* or counsel\* or monitor\* or  
40 psychiatr\* or rehab\* or treat\* or therap\*)).ti,ab,kw,tw. (64)  
41 91 ((technology-based or technology-facilitated) adj3 (care or healthcare or health care or interven\*  
42 or consult\* or counsel\* or monitor\* or psychiatr\* or rehab\* or treat\* or therap\*)).ti,ab,kw,tw. (43)  
43 92 (video\* adj3 (care or healthcare or health care or interven\* or consult\* or counsel\* or monitor\* or  
44 psychiatr\* or rehab\* or treat\* or therap\*)).ti,ab,kw,tw. (217)  
45 93 (virtual\* adj3 (care or healthcare or health care or interven\* or consult\* or counsel\* or monitor\* or  
46 psychiatr\* or rehab\* or treat\* or therap\*)).ti,ab,kw,tw. (88)  
47 94 Patient Portals/ (0)  
48 95 (patient? adj2 (portal or portals)).ti,ab,kw,tw. (29)  
49 96 ((health information or medical information or clinical information) adj3 (portal or  
50 portals)).ti,ab,kw,tw. (0)  
51  
52  
53  
54  
55  
56  
57  
58  
59  
60



97 ((health data or medical data or clinical data) adj3 (portal or portals)).ti,ab,kw,tw. (0)  
 98 health portal?.ti,ab,kw,tw. (1)  
 99 Electronic Mail/ (0)  
 100 (electronic mail\* or email\* or e-mail\*).ti,ab,kw,tw. (2207)  
 101 exp Telephone/ (21)  
 102 (telephon\* or tele-phon\* or phone or phoned or phones or phoning or answering service? or telefacsimile\* or tele-facsimile\* or FAX).ti,ab,kw,tw. (3243)  
 103 exp Television/ (3)  
 104 (televis\* or tele-vis\* or TV or TVs or videorecord\* or video-record\* or videotap\* or video tap\*).ti,ab,kw,tw. (510)  
 105 Videoconferencing/ (2)  
 106 (videoconferenc\* or video-conference\* or videophon\* or video-phon\*).ti,ab,kw,tw. (81)  
 107 Electronic Health Records/ (5)  
 108 electronic health record?.ti,ab,kw,tw. (64)  
 109 (EHR or EHRs or EMR or EMRs or PHR or PHRs).ti,ab,kw,tw. (38)  
 110 Hotlines/ (1)  
 111 hotline?.ti,ab,kw,tw. (44)  
 112 Telecommunications/ (6)  
 113 (telecommunicat\* or tele-communicat\*).ti,ab,kw,tw. (107)  
 114 exp Telemedicine/ (124)  
 115 Telenursing/ (1)  
 116 (ehealth or e-health or mhealth or m-health or mobile health).ti,ab,kw,tw. (147)  
 117 (telecare or tele-care or teleconsult\* or tele-consult\* or telecounsel\* or tele-counsel\* or telehome\* or tele-home\* or telemed\* or tele-med\* or telemonitor\* or tele-monitor\* or telenurs\* or tele-nurs\* or telepsychiatr\* or tele-psychiatr\* or telerehab\* or tele-rehab\*).ti,ab,kw,tw. (444)  
 118 (remote\$2 adj3 (care or healthcare or health care or consult\* or counsel\* or interven\* or monitor\* or psychiatr\* or rehab\* or treat\* or therap\*).ti,ab,kw,tw. (206)  
 119 or/82-118 [DIGITAL HEALTH TECHNOLOGIES] (5328)  
 120 81 and 119 [CHRONIC DISEASE & MENTAL HEALTH PROBLEMS - DIGITAL HEALTH TECHNOLOGIES] (1688)  
 121 limit 120 to yr="2010-current" [Limit not valid in DARE; records were retained] (1449)  
 122 remove duplicates from 121 (1449) [TOTAL UNIQUE RECORDS]  
 123 122 use coch [CDSR UNIQUE RECORDS] (1362)  
 124 122 use dare [DARE UNIQUE RECORDS] (82)  
 125 122 use clhta [HTA UNIQUE RECORDS] (5)

\*\*\*\*\*

#### CINAHL

| #    | Query         | Limiters/Expanders                                                               | Last Run Via                                                            | Results |
|------|---------------|----------------------------------------------------------------------------------|-------------------------------------------------------------------------|---------|
| S125 | S110 AND S123 | Limiters - Published<br>Date: 20100101-20201231<br>Search modes - Boolean/Phrase | Interface - EBSCOhost<br>Research Databases<br>Search Screen - Advanced | 164     |

|      |                                                                                              |                               |                                                                                                                |         |
|------|----------------------------------------------------------------------------------------------|-------------------------------|----------------------------------------------------------------------------------------------------------------|---------|
|      |                                                                                              |                               | Search Database - CINAHL Plus with Full Text                                                                   |         |
| S124 | S110 AND S123                                                                                | Search modes - Boolean/Phrase | Interface - EBSCOhost Research Databases Search Screen - Advanced Search Database - CINAHL Plus with Full Text | 188     |
| S123 | S111 OR S112 OR S113 OR S114 OR S115 OR S116 OR S117 OR S118 OR S119 OR S120 OR S121 OR S122 | Search modes - Boolean/Phrase | Interface - EBSCOhost Research Databases Search Screen - Advanced Search Database - CINAHL Plus with Full Text | 200,742 |
| S122 | TI simultaneous* W0 compar* OR AB simultaneous* W0 compar*                                   | Search modes - Boolean/Phrase | Interface - EBSCOhost Research Databases Search Screen - Advanced Search Database - CINAHL Plus with Full Text | 145     |
| S121 | TI (multi W0 treatment*) N1 compar* OR AB (multi W0 treatment*) N1 compar*                   | Search modes - Boolean/Phrase | Interface - EBSCOhost Research Databases                                                                       | 2       |

|      |                                                                                     |                                  |                                                                                                                                                 |     |
|------|-------------------------------------------------------------------------------------|----------------------------------|-------------------------------------------------------------------------------------------------------------------------------------------------|-----|
|      |                                                                                     |                                  | Search<br>Screen -<br>Advanced<br>Search<br>Database -<br>CINAHL Plus<br>with Full<br>Text                                                      |     |
| S120 | TI (multiple W0 treatment*) N1 compar* OR AB<br>(multiple W0 treatment*) N1 compar* | Search modes -<br>Boolean/Phrase | Interface -<br>EBSCOhost<br>Research<br>Databases<br>Search<br>Screen -<br>Advanced<br>Search<br>Database -<br>CINAHL Plus<br>with Full<br>Text | 75  |
| S119 | TI (mixed W0 treatment*) N1 compar* OR AB<br>(mixed W0 treatment*) N1 compar*       | Search modes -<br>Boolean/Phrase | Interface -<br>EBSCOhost<br>Research<br>Databases<br>Search<br>Screen -<br>Advanced<br>Search<br>Database -<br>CINAHL Plus<br>with Full<br>Text | 229 |
| S118 | TI (indirect W0 treatment*) N1 compar* OR AB<br>(indirect W0 treatment*) N1 compar* | Search modes -<br>Boolean/Phrase | Interface -<br>EBSCOhost<br>Research<br>Databases<br>Search<br>Screen -<br>Advanced<br>Search<br>Database -<br>CINAHL Plus<br>with Full<br>Text | 109 |

|      |                                                                                                                                                                                                                                                                                                                                                                                                                                                       |                               |                                                                                                                |         |
|------|-------------------------------------------------------------------------------------------------------------------------------------------------------------------------------------------------------------------------------------------------------------------------------------------------------------------------------------------------------------------------------------------------------------------------------------------------------|-------------------------------|----------------------------------------------------------------------------------------------------------------|---------|
| S117 | TI indirect* W0 compar* OR AB indirect* W0 compar*                                                                                                                                                                                                                                                                                                                                                                                                    | Search modes - Boolean/Phrase | Interface - EBSCOhost Research Databases Search Screen - Advanced Search Database - CINAHL Plus with Full Text | 818     |
| S116 | TI ( NMA or NMAs or MTC or MTCs or MAIC or MAICs ) OR AB ( NMA or NMAs or MTC or MTCs or MAIC or MAICs )                                                                                                                                                                                                                                                                                                                                              | Search modes - Boolean/Phrase | Interface - EBSCOhost Research Databases Search Screen - Advanced Search Database - CINAHL Plus with Full Text | 1,002   |
| S115 | TI ( network W0 (MA or MAs) ) OR AB ( network W0 (MA or MAs) )                                                                                                                                                                                                                                                                                                                                                                                        | Search modes - Boolean/Phrase | Interface - EBSCOhost Research Databases Search Screen - Advanced Search Database - CINAHL Plus with Full Text | 4       |
| S114 | TI ( "systematic review" or "systematic reviews" or "systematic overview" or "systematic overviews" or "evidence-based review" or "evidence-based reviews" or "evidence-based overview" or "evidence-based overviews" or (evidence N3 (review* or overview*)) or "meta-review" or "meta-reviews" or "meta-overview" or "meta-overviews" or (meta W0 synthes*) or "rapid review" or "rapid reviews" or "review of reviews" or (umbrella W0 review#) or | Search modes - Boolean/Phrase | Interface - EBSCOhost Research Databases Search Screen - Advanced Search Database - CINAHL Plus                | 121,130 |

|      |                                                                                                                                                                                                                                                                                                                                                                                                                                                                                                                                                       |                               |                                                                                                                |        |
|------|-------------------------------------------------------------------------------------------------------------------------------------------------------------------------------------------------------------------------------------------------------------------------------------------------------------------------------------------------------------------------------------------------------------------------------------------------------------------------------------------------------------------------------------------------------|-------------------------------|----------------------------------------------------------------------------------------------------------------|--------|
|      | (technology W0 assessment*) or HTA or HTAs )<br>OR AB ( "systematic review" or "systematic reviews" or "systematic overview" or "systematic overviews" or "evidence-based review" or "evidence-based reviews" or "evidence-based overview" or "evidence-based overviews" or (evidence N3 (review* or overview*)) or "meta-review" or "meta-reviews" or "meta-overview" or "meta-overviews" or (meta W0 synthes*) or "rapid review" or "rapid reviews" or "review of reviews" or (umbrella W0 review#) or (technology W0 assessment*) or HTA or HTAs ) |                               | with Full Text                                                                                                 |        |
| S113 | TI ( (meta W0 analy*) or metanaly* or metaanaly* or (met W0 analy*) or "integrative research" or (integrative W0 review*) or (integrative W0 overview*) or "research integration" or (research W0 overview*) or (collaborative W0 review*) ) OR AB ( (meta W0 analy*) or metanaly* or metaanaly* or (met W0 analy*) or "integrative research" or (integrative W0 review*) or (integrative W0 overview*) or "research integration" or (research W0 overview*) or (collaborative W0 review*) )                                                          | Search modes - Boolean/Phrase | Interface - EBSCOhost Research Databases Search Screen - Advanced Search Database - CINAHL Plus with Full Text | 77,959 |
| S112 | (MH "Meta Analysis") OR (MH "Meta Synthesis")                                                                                                                                                                                                                                                                                                                                                                                                                                                                                                         | Search modes - Boolean/Phrase | Interface - EBSCOhost Research Databases Search Screen - Advanced Search Database - CINAHL Plus with Full Text | 52,660 |
| S111 | MH "Systematic Review"                                                                                                                                                                                                                                                                                                                                                                                                                                                                                                                                | Search modes - Boolean/Phrase | Interface - EBSCOhost Research Databases Search Screen - Advanced Search Database -                            | 95,081 |

|      |                                                                                                                                                                                                                                                                                                                |                               |                                                                                                                |         |
|------|----------------------------------------------------------------------------------------------------------------------------------------------------------------------------------------------------------------------------------------------------------------------------------------------------------------|-------------------------------|----------------------------------------------------------------------------------------------------------------|---------|
|      |                                                                                                                                                                                                                                                                                                                |                               | CINAHL Plus with Full Text                                                                                     |         |
| S110 | S72 AND S109                                                                                                                                                                                                                                                                                                   | Search modes - Boolean/Phrase | Interface - EBSCOhost Research Databases Search Screen - Advanced Search Database - CINAHL Plus with Full Text | 3,893   |
| S109 | S73 OR S74 OR S75 OR S76 OR S77 OR S78 OR S79 OR S80 OR S81 OR S82 OR S83 OR S84 OR S85 OR S86 OR S87 OR S88 OR S89 OR S90 OR S91 OR S92 OR S93 OR S94 OR S95 OR S96 OR S97 OR S98 OR S99 OR S100 OR S101 OR S102 OR S103 OR S104 OR S105 OR S106 OR S107 OR S108                                              | Search modes - Boolean/Phrase | Interface - EBSCOhost Research Databases Search Screen - Advanced Search Database - CINAHL Plus with Full Text | 335,223 |
| S108 | TI ( remote* N3 (care or healthcare or "health care" or consult* or counsel* or interven* or monitor* or psychiatr* or rehab* or treat* or therap*) ) OR AB ( remote* N3 (care or healthcare or "health care" or consult* or counsel* or interven* or monitor* or psychiatr* or rehab* or treat* or therap*) ) | Search modes - Boolean/Phrase | Interface - EBSCOhost Research Databases Search Screen - Advanced Search Database - CINAHL Plus with Full Text | 3,227   |
| S107 | TI ( telecare or "tele-care" or teleconsult* or (tele W0 consult*) or telecounsel* or (tele W0 counsel*) or telehome* or (tele W0 home*) or telemed* or (tele W0 med*) or telemonitor* or (tele W0 monitor*) or telenurs* or (tele W0 nurs*) or telepsychiatr* or (tele W0 psychiatr*)                         | Search modes - Boolean/Phrase | Interface - EBSCOhost Research Databases Search Screen -                                                       | 8,057   |

|      |                                                                                                                                                                                                                                                                                                                                                                 |                               |                                                                                                                |        |
|------|-----------------------------------------------------------------------------------------------------------------------------------------------------------------------------------------------------------------------------------------------------------------------------------------------------------------------------------------------------------------|-------------------------------|----------------------------------------------------------------------------------------------------------------|--------|
|      | or telerehab* or (tele W0 rehab* ) OR AB ( telecare or "tele-care" or teleconsult* or (tele W0 consult*) or telecounsel* or (tele W0 counsel*) or telehome* or (tele W0 home*) or telemed* or (tele W0 med*) or telemonitor* or (tele W0 monitor*) or telenurs* or (tele W0 nurs*) or telepsychiatr* or (tele W0 psychiatr*) or telerehab* or (tele W0 rehab* ) |                               | Advanced Search Database - CINAHL Plus with Full Text                                                          |        |
| S106 | TI ( ehealth or "e-health" or mhealth or "m-health" or mobile health ) OR AB ( ehealth or "e-health" or mhealth or "m-health" or mobile health )                                                                                                                                                                                                                | Search modes - Boolean/Phrase | Interface - EBSCOhost Research Databases Search Screen - Advanced Search Database - CINAHL Plus with Full Text | 6,246  |
| S105 | (MH "Telenursing")                                                                                                                                                                                                                                                                                                                                              | Search modes - Boolean/Phrase | Interface - EBSCOhost Research Databases Search Screen - Advanced Search Database - CINAHL Plus with Full Text | 2,178  |
| S104 | (MH "Telemedicine+") OR (MH "Telepsychiatry")                                                                                                                                                                                                                                                                                                                   | Search modes - Boolean/Phrase | Interface - EBSCOhost Research Databases Search Screen - Advanced Search Database - CINAHL Plus with Full Text | 14,054 |



|      |                                                                                                    |                               |                                                                                                                |       |
|------|----------------------------------------------------------------------------------------------------|-------------------------------|----------------------------------------------------------------------------------------------------------------|-------|
| S103 | TI ( telecommunicat* or (tele W0 communicat*) ) OR AB ( telecommunicat* or (tele W0 communicat*) ) | Search modes - Boolean/Phrase | Interface - EBSCOhost Research Databases Search Screen - Advanced Search Database - CINAHL Plus with Full Text | 1,110 |
| S102 | (MH "Telecommunications")                                                                          | Search modes - Boolean/Phrase | Interface - EBSCOhost Research Databases Search Screen - Advanced Search Database - CINAHL Plus with Full Text | 2,431 |
| S101 | TI hotline# OR AB hotline#                                                                         | Search modes - Boolean/Phrase | Interface - EBSCOhost Research Databases Search Screen - Advanced Search Database - CINAHL Plus with Full Text | 813   |
| S100 | (MH "Telephone Information Services")                                                              | Search modes - Boolean/Phrase | Interface - EBSCOhost Research Databases Search Screen - Advanced Search Database - CINAHL Plus                | 3,343 |

|     |                                                                                                                                                                        |                               |                                                                                                                |        |
|-----|------------------------------------------------------------------------------------------------------------------------------------------------------------------------|-------------------------------|----------------------------------------------------------------------------------------------------------------|--------|
|     |                                                                                                                                                                        |                               | with Full Text                                                                                                 |        |
| S99 | TI ( EHR or EHRs or EMR or EMRs or PHR or PHRs ) OR AB ( EHR or EHRs or EMR or EMRs or PHR or PHRs )                                                                   | Search modes - Boolean/Phrase | Interface - EBSCOhost Research Databases Search Screen - Advanced Search Database - CINAHL Plus with Full Text | 11,465 |
| S98 | TI ( "electronic health record" or "electronic health records" ) OR AB ( "electronic health record" or "electronic health records" )                                   | Search modes - Boolean/Phrase | Interface - EBSCOhost Research Databases Search Screen - Advanced Search Database - CINAHL Plus with Full Text | 11,666 |
| S97 | MH "Electronic Health Records"                                                                                                                                         | Search modes - Boolean/Phrase | Interface - EBSCOhost Research Databases Search Screen - Advanced Search Database - CINAHL Plus with Full Text | 26,377 |
| S96 | TI ( videoconferenc* or (video W0 conferenc*) or videophon* or (video W0 phon*) ) OR AB ( videoconferenc* or (video W0 conferenc*) or videophon* or (video W0 phon*) ) | Search modes - Boolean/Phrase | Interface - EBSCOhost Research Databases Search Screen - Advanced                                              | 1,879  |

|     |                                                                                                                                                                                                                                                |                               |                                                                                                                |        |
|-----|------------------------------------------------------------------------------------------------------------------------------------------------------------------------------------------------------------------------------------------------|-------------------------------|----------------------------------------------------------------------------------------------------------------|--------|
|     |                                                                                                                                                                                                                                                |                               | Search Database - CINAHL Plus with Full Text                                                                   |        |
| S95 | (MH "Videoconferencing+")                                                                                                                                                                                                                      | Search modes - Boolean/Phrase | Interface - EBSCOhost Research Databases Search Screen - Advanced Search Database - CINAHL Plus with Full Text | 3,141  |
| S94 | TI ( televis* or (tele W0 vis*) or TV or TVs or videorecord* or (video W0 record*) or videotap* or (video W0 tap*). ) OR AB ( televis* or (tele W0 vis*) or TV or TVs or videorecord* or (video W0 record*) or videotap* or (video W0 tap*). ) | Search modes - Boolean/Phrase | Interface - EBSCOhost Research Databases Search Screen - Advanced Search Database - CINAHL Plus with Full Text | 21,412 |
| S93 | (MH "Television") OR (MH "Videorecording+")                                                                                                                                                                                                    | Search modes - Boolean/Phrase | Interface - EBSCOhost Research Databases Search Screen - Advanced Search Database - CINAHL Plus with Full Text | 43,241 |
| S92 | TI ( telephon* or (tele W0 phon*) or phone or phoned or phones or phoning or "answering service" or "answering services" or telefacsimile* or "tele-facsimile" or "tele-                                                                       | Search modes - Boolean/Phrase | Interface - EBSCOhost Research Databases                                                                       | 46,130 |

|     |                                                                                                                                                                                                                      |                               |                                                                                                                |        |
|-----|----------------------------------------------------------------------------------------------------------------------------------------------------------------------------------------------------------------------|-------------------------------|----------------------------------------------------------------------------------------------------------------|--------|
|     | facsimiles" or FAX ) OR AB ( telephon* or (tele W0 phon*) or phone or phoned or phones or phoning or "answering service" or "answering services" or telefacsimile* or "tele-facsimile" or "tele-facsimiles" or FAX ) |                               | Search Screen - Advanced Search Database - CINAHL Plus with Full Text                                          |        |
| S91 | (MH "Telephone+")                                                                                                                                                                                                    | Search modes - Boolean/Phrase | Interface - EBSCOhost Research Databases Search Screen - Advanced Search Database - CINAHL Plus with Full Text | 25,218 |
| S90 | TI ( (electronic W0 mail*) or email* or (e W0 mail*) ) OR AB ( (electronic W0 mail*) or email* or (e W0 mail*) )                                                                                                     | Search modes - Boolean/Phrase | Interface - EBSCOhost Research Databases Search Screen - Advanced Search Database - CINAHL Plus with Full Text | 11,502 |
| S89 | (MH "Email")                                                                                                                                                                                                         | Search modes - Boolean/Phrase | Interface - EBSCOhost Research Databases Search Screen - Advanced Search Database - CINAHL Plus with Full Text | 6,941  |

|     |                                                                                                                                                                                                                    |                               |                                                                                                                |       |
|-----|--------------------------------------------------------------------------------------------------------------------------------------------------------------------------------------------------------------------|-------------------------------|----------------------------------------------------------------------------------------------------------------|-------|
| S88 | TI ( "health portal" or "health portals" ) OR AB ( "health portal" or "health portals" )                                                                                                                           | Search modes - Boolean/Phrase | Interface - EBSCOhost Research Databases Search Screen - Advanced Search Database - CINAHL Plus with Full Text | 84    |
| S87 | TI ( "health data" or "medical data" or "clinical data" ) N3 (portal or portals) ) OR AB ( ("health data" or "medical data" or "clinical data") N3 (portal or portals) )                                           | Search modes - Boolean/Phrase | Interface - EBSCOhost Research Databases Search Screen - Advanced Search Database - CINAHL Plus with Full Text | 14    |
| S86 | TI ( "health information" or "medical information" or "clinical information" ) N3 (portal or portals) ) OR AB ( ("health information" or "medical information" or "clinical information") N3 (portal or portals) ) | Search modes - Boolean/Phrase | Interface - EBSCOhost Research Databases Search Screen - Advanced Search Database - CINAHL Plus with Full Text | 67    |
| S85 | TI ( patient# N2 (portal or portals) ) OR AB ( patient# N2 (portal or portals) )                                                                                                                                   | Search modes - Boolean/Phrase | Interface - EBSCOhost Research Databases Search Screen - Advanced Search Database - CINAHL Plus                | 1,431 |

|     |                                                                                                                                                                                                                                                                                                                           |                               |                                                                                                                |       |
|-----|---------------------------------------------------------------------------------------------------------------------------------------------------------------------------------------------------------------------------------------------------------------------------------------------------------------------------|-------------------------------|----------------------------------------------------------------------------------------------------------------|-------|
|     |                                                                                                                                                                                                                                                                                                                           |                               | with Full Text                                                                                                 |       |
| S84 | (MH "Patient Portals")                                                                                                                                                                                                                                                                                                    | Search modes - Boolean/Phrase | Interface - EBSCOhost Research Databases Search Screen - Advanced Search Database - CINAHL Plus with Full Text | 88    |
| S83 | TI ( virtual* N3 (care or healthcare or "health care" or interven* or consult* or counsel* or monitor* or psychiatr* or rehab* or treat* or therap*) ) OR AB ( virtual* N3 (care or healthcare or "health care" or interven* or consult* or counsel* or monitor* or psychiatr* or rehab* or treat* or therap*) )          | Search modes - Boolean/Phrase | Interface - EBSCOhost Research Databases Search Screen - Advanced Search Database - CINAHL Plus with Full Text | 2,160 |
| S82 | TI ( video* N3 (care or healthcare or "health care" or interven* or consult* or counsel* or monitor* or psychiatr* or rehab* or treat* or therap*) ) OR AB ( video* N3 (care or healthcare or "health care" or interven* or consult* or counsel* or monitor* or psychiatr* or rehab* or treat* or therap*) )              | Search modes - Boolean/Phrase | Interface - EBSCOhost Research Databases Search Screen - Advanced Search Database - CINAHL Plus with Full Text | 4,419 |
| S81 | TI ( "technology-based" or "technology-facilitated") N3 (care or healthcare or "health care" or interven* or consult* or counsel* or monitor* or psychiatr* or rehab* or treat* or therap*) ) OR AB ( "technology-based" or "technology-facilitated") N3 (care or healthcare or "health care" or interven* or consult* or | Search modes - Boolean/Phrase | Interface - EBSCOhost Research Databases Search Screen - Advanced                                              | 461   |

|     |                                                                                                                                                                                                                                                                                                                                                                                                                                                                                                    |                               |                                                                                                                |       |
|-----|----------------------------------------------------------------------------------------------------------------------------------------------------------------------------------------------------------------------------------------------------------------------------------------------------------------------------------------------------------------------------------------------------------------------------------------------------------------------------------------------------|-------------------------------|----------------------------------------------------------------------------------------------------------------|-------|
|     | counsel* or monitor* or psychiatr* or rehab* or treat* or therap* )                                                                                                                                                                                                                                                                                                                                                                                                                                |                               | Search Database - CINAHL Plus with Full Text                                                                   |       |
| S80 | TI ( digital* N3 (care or healthcare or "health care" or interven* or consult* or counsel* or monitor* or psychiatr* or rehab* or treat* or therap* ) OR AB ( digital* N3 (care or healthcare or "health care" or interven* or consult* or counsel* or monitor* or psychiatr* or rehab* or treat* or therap* ) )                                                                                                                                                                                   | Search modes - Boolean/Phrase | Interface - EBSCOhost Research Databases Search Screen - Advanced Search Database - CINAHL Plus with Full Text | 2,177 |
| S79 | TI ( mobile N3 (app or apps or application#) ) OR AB ( mobile N3 (app or apps or application#) )                                                                                                                                                                                                                                                                                                                                                                                                   | Search modes - Boolean/Phrase | Interface - EBSCOhost Research Databases Search Screen - Advanced Search Database - CINAHL Plus with Full Text | 4,366 |
| S78 | TI ( (internet* or online or web or "web-based" or "web-site" or website or www or cyber* or smartphone* or (smart W0 phone*) or iphone* or "i-phone" or "i-phones" or ipad or "i-pad" or ipads or "i-pads") N3 (app or apps or application#) ) OR AB ( (internet* or online or web or "web-based" or "web-site" or website or www or cyber* or smartphone* or (smart W0 phone*) or iphone* or "i-phone" or "i-phones" or ipad or "i-pad" or ipads or "i-pads") N3 (app or apps or application#) ) | Search modes - Boolean/Phrase | Interface - EBSCOhost Research Databases Search Screen - Advanced Search Database - CINAHL Plus with Full Text | 5,284 |
| S77 | (MH "Smartphone")                                                                                                                                                                                                                                                                                                                                                                                                                                                                                  | Search modes - Boolean/Phrase | Interface - EBSCOhost Research Databases                                                                       | 2,732 |



|     |                                                                                                                                                                                                                                                                                                                                                                                                                                                                                                                                                                                                                                                                                                                                                                 |                               |                                                                                                                |         |
|-----|-----------------------------------------------------------------------------------------------------------------------------------------------------------------------------------------------------------------------------------------------------------------------------------------------------------------------------------------------------------------------------------------------------------------------------------------------------------------------------------------------------------------------------------------------------------------------------------------------------------------------------------------------------------------------------------------------------------------------------------------------------------------|-------------------------------|----------------------------------------------------------------------------------------------------------------|---------|
|     |                                                                                                                                                                                                                                                                                                                                                                                                                                                                                                                                                                                                                                                                                                                                                                 |                               | Search Screen - Advanced Search Database - CINAHL Plus with Full Text                                          |         |
| S76 | TI ( (internet* or online or web or "web-based" or "web-site" or website or www or cyber* or smartphone* or (smart W0 phone*) or iphone* or "i-phone" or "i-phones" or ipad or "i-pad" or ipads or "i-pads") N3 (care or deliver* or healthcare or "health care" or consult* or counsel* or interven* or monitor* or psychiatr* or rehab* or service# or treat* or therap*) ) OR AB ( (internet* or online or web or "web-based" or "web-site" or website or www or cyber* or smartphone* or (smart W0 phone*) or iphone* or "i-phone" or "i-phones" or ipad or "i-pad" or ipads or "i-pads") N3 (care or deliver* or healthcare or "health care" or consult* or counsel* or interven* or monitor* or psychiatr* or rehab* or service# or treat* or therap*) ). | Search modes - Boolean/Phrase | Interface - EBSCOhost Research Databases Search Screen - Advanced Search Database - CINAHL Plus with Full Text | 16,618  |
| S75 | (MH "Internet") OR (MH "World Wide Web+")                                                                                                                                                                                                                                                                                                                                                                                                                                                                                                                                                                                                                                                                                                                       | Search modes - Boolean/Phrase | Interface - EBSCOhost Research Databases Search Screen - Advanced Search Database - CINAHL Plus with Full Text | 142,133 |
| S74 | (MH "Electronic Bulletin Boards+")                                                                                                                                                                                                                                                                                                                                                                                                                                                                                                                                                                                                                                                                                                                              | Search modes - Boolean/Phrase | Interface - EBSCOhost Research Databases Search Screen - Advanced Search Database - CINAHL Plus                | 427     |

|     |                                                                                                                                                                                                         |                               |                                                                                                                |         |
|-----|---------------------------------------------------------------------------------------------------------------------------------------------------------------------------------------------------------|-------------------------------|----------------------------------------------------------------------------------------------------------------|---------|
|     |                                                                                                                                                                                                         |                               | with Full Text                                                                                                 |         |
| S73 | (MH "Computer Communication Networks") OR (MH "Local Area Networks+") OR (MH "Wide Area Networks")                                                                                                      | Search modes - Boolean/Phrase | Interface - EBSCOhost Research Databases Search Screen - Advanced Search Database - CINAHL Plus with Full Text | 3,610   |
| S72 | S41 AND S71                                                                                                                                                                                             | Search modes - Boolean/Phrase | Interface - EBSCOhost Research Databases Search Screen - Advanced Search Database - CINAHL Plus with Full Text | 83,256  |
| S71 | S42 OR S43 OR S44 OR S45 OR S46 OR S47 OR S48 OR S49 OR S50 OR S51 OR S52 OR S53 OR S54 OR S55 OR S56 OR S57 OR S58 OR S59 OR S60 OR S61 OR S62 OR S63 OR S64 OR S65 OR S66 OR S67 OR S68 OR S69 OR S70 | Search modes - Boolean/Phrase | Interface - EBSCOhost Research Databases Search Screen - Advanced Search Database - CINAHL Plus with Full Text | 347,716 |
| S70 | TI ( neuros?s N3 (trauma* or posttrauma* or post-trauma* ) ) OR AB ( neuros?s N3 (trauma* or posttrauma* or post-trauma* ) )                                                                            | Search modes - Boolean/Phrase | Interface - EBSCOhost Research Databases Search Screen - Advanced                                              | 13      |

|     |                                                                                                                                                                                          |                               |                                                                                                                |        |
|-----|------------------------------------------------------------------------------------------------------------------------------------------------------------------------------------------|-------------------------------|----------------------------------------------------------------------------------------------------------------|--------|
|     |                                                                                                                                                                                          |                               | Search Database - CINAHL Plus with Full Text                                                                   |        |
| S69 | TI ( "stress disorder" or "stress disorders") N3 (trauma* or posttrauma* or post-trauma* ) OR AB ( "stress disorder" or "stress disorders") N3 (trauma* or posttrauma* or post-trauma* ) | Search modes - Boolean/Phrase | Interface - EBSCOhost Research Databases Search Screen - Advanced Search Database - CINAHL Plus with Full Text | 14,699 |
| S68 | TI PTSD OR AB PTSD                                                                                                                                                                       | Search modes - Boolean/Phrase | Interface - EBSCOhost Research Databases Search Screen - Advanced Search Database - CINAHL Plus with Full Text | 12,171 |
| S67 | TI ( MDD and mental ) OR AB ( MDD and mental )                                                                                                                                           | Search modes - Boolean/Phrase | Interface - EBSCOhost Research Databases Search Screen - Advanced Search Database - CINAHL Plus with Full Text | 710    |
| S66 | TI ( (feel* W0 blue) or blues ) OR AB ( (feel* W0 blue) or blues )                                                                                                                       | Search modes - Boolean/Phrase | Interface - EBSCOhost Research Databases                                                                       | 9,818  |

|     |                                                                                                                     |                                  |                                                                                                                                                 |         |
|-----|---------------------------------------------------------------------------------------------------------------------|----------------------------------|-------------------------------------------------------------------------------------------------------------------------------------------------|---------|
|     |                                                                                                                     |                                  | Search<br>Screen -<br>Advanced<br>Search<br>Database -<br>CINAHL Plus<br>with Full<br>Text                                                      |         |
| S65 | TI ( depress* or dysthym* or melanchol* ) OR<br>AB ( depress* or dysthym* or melanchol* )                           | Search modes -<br>Boolean/Phrase | Interface -<br>EBSCOhost<br>Research<br>Databases<br>Search<br>Screen -<br>Advanced<br>Search<br>Database -<br>CINAHL Plus<br>with Full<br>Text | 158,485 |
| S64 | MH "Depression+"                                                                                                    | Search modes -<br>Boolean/Phrase | Interface -<br>EBSCOhost<br>Research<br>Databases<br>Search<br>Screen -<br>Advanced<br>Search<br>Database -<br>CINAHL Plus<br>with Full<br>Text | 121,857 |
| S63 | TI ( hyperkinetic or "hyper-kinetic") W0<br>syndrome# ) OR AB ( hyperkinetic or "hyper-<br>kinetic") W0 syndrome# ) | Search modes -<br>Boolean/Phrase | Interface -<br>EBSCOhost<br>Research<br>Databases<br>Search<br>Screen -<br>Advanced<br>Search<br>Database -<br>CINAHL Plus<br>with Full<br>Text | 20      |

|     |                                                                                                                                        |                                  |                                                                                                                                                 |        |
|-----|----------------------------------------------------------------------------------------------------------------------------------------|----------------------------------|-------------------------------------------------------------------------------------------------------------------------------------------------|--------|
| S62 | TI ( ADDH or ADHD ) OR AB ( ADDH or ADHD )                                                                                             | Search modes -<br>Boolean/Phrase | Interface -<br>EBSCOhost<br>Research<br>Databases<br>Search<br>Screen -<br>Advanced<br>Search<br>Database -<br>CINAHL Plus<br>with Full<br>Text | 13,521 |
| S61 | TI ( "attention deficit" or "attention deficits" )<br>OR AB ( "attention deficit" or "attention<br>deficits" )                         | Search modes -<br>Boolean/Phrase | Interface -<br>EBSCOhost<br>Research<br>Databases<br>Search<br>Screen -<br>Advanced<br>Search<br>Database -<br>CINAHL Plus<br>with Full<br>Text | 8,622  |
| S60 | MH "Attention Deficit Hyperactivity Disorder"                                                                                          | Search modes -<br>Boolean/Phrase | Interface -<br>EBSCOhost<br>Research<br>Databases<br>Search<br>Screen -<br>Advanced<br>Search<br>Database -<br>CINAHL Plus<br>with Full<br>Text | 17,669 |
| S59 | TI ( catastrophi?ation# or catastrophi?e* or<br>catastrophi?ing ) OR AB ( catastrophi?ation# or<br>catastrophi?e* or catastrophi?ing ) | Search modes -<br>Boolean/Phrase | Interface -<br>EBSCOhost<br>Research<br>Databases<br>Search<br>Screen -<br>Advanced<br>Search<br>Database -<br>CINAHL Plus                      | 2,355  |

|     |                                                                                                                                                                                                                                                                                                                  |                               |                                                                                                                |       |
|-----|------------------------------------------------------------------------------------------------------------------------------------------------------------------------------------------------------------------------------------------------------------------------------------------------------------------|-------------------------------|----------------------------------------------------------------------------------------------------------------|-------|
|     |                                                                                                                                                                                                                                                                                                                  |                               | with Full Text                                                                                                 |       |
| S58 | TI ( phobia or phobias or phobic ) OR AB ( phobia or phobias or phobic )                                                                                                                                                                                                                                         | Search modes - Boolean/Phrase | Interface - EBSCOhost Research Databases Search Screen - Advanced Search Database - CINAHL Plus with Full Text | 3,144 |
| S57 | TI ( (panic W0 disorder*) or (panic N2 attack*) ) OR AB ( (panic W0 disorder*) or (panic N2 attack*) )                                                                                                                                                                                                           | Search modes - Boolean/Phrase | Interface - EBSCOhost Research Databases Search Screen - Advanced Search Database - CINAHL Plus with Full Text | 2,756 |
| S56 | TI ( "obsessive-compulsive" or (anankastic W0 personalit*) or (compulsive W0 personalit*) or (obsessive W0 personalit*) or hoarding or psychastheni* ) OR AB ( "obsessive-compulsive" or (anankastic W0 personalit*) or (compulsive W0 personalit*) or (obsessive W0 personalit*) or hoarding or psychastheni* ) | Search modes - Boolean/Phrase | Interface - EBSCOhost Research Databases Search Screen - Advanced Search Database - CINAHL Plus with Full Text | 5,730 |
| S55 | TI ( (neurotic W0 disorder*) or neuros?s or psychoneuros?s or psycho-neuros?s ) OR AB ( (neurotic W0 disorder*) or neuros?s or psychoneuros?s or psycho-neuros?s )                                                                                                                                               | Search modes - Boolean/Phrase | Interface - EBSCOhost Research Databases Search Screen - Advanced                                              | 629   |

|     |                                                                                                                                                                                                                                                                |                               |                                                                                                                |        |
|-----|----------------------------------------------------------------------------------------------------------------------------------------------------------------------------------------------------------------------------------------------------------------|-------------------------------|----------------------------------------------------------------------------------------------------------------|--------|
|     |                                                                                                                                                                                                                                                                |                               | Search Database - CINAHL Plus with Full Text                                                                   |        |
| S54 | TI ( (neurocirculatory W0 asthenia*) or (cardiac W0 neuro?s or (effort W0 syndrome*) or ("hyperkinetic heart" W0 syndrome*) ) OR AB ( (neurocirculatory W0 asthenia*) or (cardiac W0 neuro?s or (effort W0 syndrome*) or ("hyperkinetic heart" W0 syndrome*) ) | Search modes - Boolean/Phrase | Interface - EBSCOhost Research Databases Search Screen - Advanced Search Database - CINAHL Plus with Full Text | 15     |
| S53 | TI ( agoraphobi* or claustrophobi* or homophobi* or neophobi* or xenophobi* ) OR AB ( agoraphobi* or claustrophobi* or homophobi* or neophobi* or xenophobi* )                                                                                                 | Search modes - Boolean/Phrase | Interface - EBSCOhost Research Databases Search Screen - Advanced Search Database - CINAHL Plus with Full Text | 2,337  |
| S52 | TI ( (incessan* or obsessive* or persistan* or intense*) N3 fear* ) OR AB ( (incessan* or obsessive* or persistan* or intense*) N3 fear* )                                                                                                                     | Search modes - Boolean/Phrase | Interface - EBSCOhost Research Databases Search Screen - Advanced Search Database - CINAHL Plus with Full Text | 174    |
| S51 | TI ( hypervigilan* or hyper-vigilan* or nervous* ) OR AB ( hypervigilan* or hyper-vigilan* or nervous* )                                                                                                                                                       | Search modes - Boolean/Phrase | Interface - EBSCOhost Research Databases                                                                       | 30,051 |



|     |                                                                                    |                                  |                                                                                                                                                 |        |
|-----|------------------------------------------------------------------------------------|----------------------------------|-------------------------------------------------------------------------------------------------------------------------------------------------|--------|
|     |                                                                                    |                                  | Search<br>Screen -<br>Advanced<br>Search<br>Database -<br>CINAHL Plus<br>with Full<br>Text                                                      |        |
| S50 | TI GAD OR AB GAD                                                                   | Search modes -<br>Boolean/Phrase | Interface -<br>EBSCOhost<br>Research<br>Databases<br>Search<br>Screen -<br>Advanced<br>Search<br>Database -<br>CINAHL Plus<br>with Full<br>Text | 1,627  |
| S49 | TI ( anxiety or anxieties or anxious* ) OR AB ( anxiety or anxieties or anxious* ) | Search modes -<br>Boolean/Phrase | Interface -<br>EBSCOhost<br>Research<br>Databases<br>Search<br>Screen -<br>Advanced<br>Search<br>Database -<br>CINAHL Plus<br>with Full<br>Text | 87,663 |
| S48 | MH "Anxiety+"                                                                      | Search modes -<br>Boolean/Phrase | Interface -<br>EBSCOhost<br>Research<br>Databases<br>Search<br>Screen -<br>Advanced<br>Search<br>Database -<br>CINAHL Plus<br>with Full<br>Text | 49,349 |

|     |                                                                                                                                                 |                                  |                                                                                                                                                 |        |
|-----|-------------------------------------------------------------------------------------------------------------------------------------------------|----------------------------------|-------------------------------------------------------------------------------------------------------------------------------------------------|--------|
| S47 | MH "Anxiety Disorders+"                                                                                                                         | Search modes -<br>Boolean/Phrase | Interface -<br>EBSCOhost<br>Research<br>Databases<br>Search<br>Screen -<br>Advanced<br>Search<br>Database -<br>CINAHL Plus<br>with Full<br>Text | 49,095 |
| S46 | TI ( (cyclothymic or "cyclo-thymic") W0<br>(disorder# or personalit*) ) OR AB ( (cyclothymic or "cyclo-thymic") W0 (disorder# or personalit*) ) | Search modes -<br>Boolean/Phrase | Interface -<br>EBSCOhost<br>Research<br>Databases<br>Search<br>Screen -<br>Advanced<br>Search<br>Database -<br>CINAHL Plus<br>with Full<br>Text | 27     |
| S45 | MH "Cyclothymic Disorder"                                                                                                                       | Search modes -<br>Boolean/Phrase | Interface -<br>EBSCOhost<br>Research<br>Databases<br>Search<br>Screen -<br>Advanced<br>Search<br>Database -<br>CINAHL Plus<br>with Full<br>Text | 181    |
| S44 | TI ( (affective or mood) W0 disorder# ) OR AB ( (affective or mood) W0 disorder# )                                                              | Search modes -<br>Boolean/Phrase | Interface -<br>EBSCOhost<br>Research<br>Databases<br>Search<br>Screen -<br>Advanced<br>Search<br>Database -<br>CINAHL Plus                      | 8,199  |

|     |                                                                                                                                                                                                                                                                                               |                               |                                                                                                                |           |
|-----|-----------------------------------------------------------------------------------------------------------------------------------------------------------------------------------------------------------------------------------------------------------------------------------------------|-------------------------------|----------------------------------------------------------------------------------------------------------------|-----------|
|     |                                                                                                                                                                                                                                                                                               |                               | with Full Text                                                                                                 |           |
| S43 | MH "Affective Disorders+"                                                                                                                                                                                                                                                                     | Search modes - Boolean/Phrase | Interface - EBSCOhost Research Databases Search Screen - Advanced Search Database - CINAHL Plus with Full Text | 128,800   |
| S42 | TI ( (emotional* or mental* or psychological* or social*) N2 health* N3 (disorder* or morbidit* or comorbid* or co-morbidit* or problem*) )<br>OR AB ( (emotional* or mental* or psychological* or social*) N2 health* N3 (disorder* or morbidit* or comorbid* or co-morbidit* or problem*) ) | Search modes - Boolean/Phrase | Interface - EBSCOhost Research Databases Search Screen - Advanced Search Database - CINAHL Plus with Full Text | 18,400    |
| S41 | S3 OR S40                                                                                                                                                                                                                                                                                     | Search modes - Boolean/Phrase | Interface - EBSCOhost Research Databases Search Screen - Advanced Search Database - CINAHL Plus with Full Text | 1,920,672 |
| S40 | S4 OR S5 OR S6 OR S7 OR S8 OR S9 OR S10 OR S11 OR S12 OR S13 OR S14 OR S15 OR S16 OR S17 OR S18 OR S19 OR S20 OR S21 OR S22 OR S23 OR S24 OR S25 OR S26 OR S27 OR S28 OR S29 OR S30 OR S31 OR S32 OR S33 OR S34 OR S35 OR S36 OR S37 OR S38 OR S39                                            | Search modes - Boolean/Phrase | Interface - EBSCOhost Research Databases Search Screen - Advanced                                              | 1,836,239 |

|     |                                                                                                                                                                                      |                               |                                                                                                                |         |
|-----|--------------------------------------------------------------------------------------------------------------------------------------------------------------------------------------|-------------------------------|----------------------------------------------------------------------------------------------------------------|---------|
|     |                                                                                                                                                                                      |                               | Search Database - CINAHL Plus with Full Text                                                                   |         |
| S39 | TI ( (elevated or high*) N2 blood pressure* ) OR AB ( (elevated or high*) N2 blood pressure* )                                                                                       | Search modes - Boolean/Phrase | Interface - EBSCOhost Research Databases Search Screen - Advanced Search Database - CINAHL Plus with Full Text | 10,361  |
| S38 | TI hypertens* OR AB hypertens*                                                                                                                                                       | Search modes - Boolean/Phrase | Interface - EBSCOhost Research Databases Search Screen - Advanced Search Database - CINAHL Plus with Full Text | 93,958  |
| S37 | TI ( arterioscleros* or arterio-scleros* or atheroscleros* or athero-scleros* ) OR AB ( arterioscleros* or arterio-scleros* or atheroscleros* or athero-scleros* )                   | Search modes - Boolean/Phrase | Interface - EBSCOhost Research Databases Search Screen - Advanced Search Database - CINAHL Plus with Full Text | 18,802  |
| S36 | TI ( (artery or arteries or arterial or atrial* or atrium* or cardiac* or cardio* or cardiovascul* or cardio-vascul* or coronary or heart* or myocard* or ventricle*) N3 (arrest* or | Search modes - Boolean/Phrase | Interface - EBSCOhost Research Databases                                                                       | 291,187 |

|     |                                                                                                                                                                                                                                                                                                                                                                                                                                                                                                                                                                                                                                                                                                                                               |                               |                                                                                                                |         |
|-----|-----------------------------------------------------------------------------------------------------------------------------------------------------------------------------------------------------------------------------------------------------------------------------------------------------------------------------------------------------------------------------------------------------------------------------------------------------------------------------------------------------------------------------------------------------------------------------------------------------------------------------------------------------------------------------------------------------------------------------------------------|-------------------------------|----------------------------------------------------------------------------------------------------------------|---------|
|     | aneurysm* or arrhythmia* or arrythmia* or disease* or disorder* or dysrhythmia* or dysrythmia* or dysfunction* or failure* or fibrillation* or ischemi* or infarction* or obstruct* or occlu* or rupture* or stenosis or syndrom* or thrombo* or vasospas* or vasospas*) ) OR AB ( (artery or arteries or arterial or atrial* or atrium* or cardiac* or cardio* or cardiovascul* or cardio-vascul* or coronary or heart* or myocard* or ventricle*) N3 (arrest* or aneurysm* or arrhythmia* or arrythmia* or disease* or disorder* or dysrhythmia* or dysrythmia* or dysfunction* or failure* or fibrillation* or ischemi* or infarction* or obstruct* or occlu* or rupture* or stenosis or syndrom* or thrombo* or vasospas* or vasospas*) ) |                               | Search Screen - Advanced Search Database - CINAHL Plus with Full Text                                          |         |
| S35 | MH "Cardiovascular Diseases+"                                                                                                                                                                                                                                                                                                                                                                                                                                                                                                                                                                                                                                                                                                                 | Search modes - Boolean/Phrase | Interface - EBSCOhost Research Databases Search Screen - Advanced Search Database - CINAHL Plus with Full Text | 616,463 |
| S34 | TI ( COPD or COAD ) OR AB ( COPD or COAD )                                                                                                                                                                                                                                                                                                                                                                                                                                                                                                                                                                                                                                                                                                    | Search modes - Boolean/Phrase | Interface - EBSCOhost Research Databases Search Screen - Advanced Search Database - CINAHL Plus with Full Text | 17,097  |
| S33 | TI ( emphysema# N3 (pulmonary or airway* or air way* or lung or lungs or airflow* or air flow* or centriacinar or "centri-acinar" or centrilobular or "centri-lobular" or panacinar or "pan-acinar" or panlobular or "pan-lobular") )                                                                                                                                                                                                                                                                                                                                                                                                                                                                                                         | Search modes - Boolean/Phrase | Interface - EBSCOhost Research Databases Search                                                                | 1,209   |

|     |                                                                                                                                                                                                                                                                                                                                            |                               |                                                                                                                |        |
|-----|--------------------------------------------------------------------------------------------------------------------------------------------------------------------------------------------------------------------------------------------------------------------------------------------------------------------------------------------|-------------------------------|----------------------------------------------------------------------------------------------------------------|--------|
|     | OR AB ( emphysema# N3 (pulmonary or airway* or air way* or lung or lungs or airflow* or air flow* or centriacinar or "centri-acinar" or centrilobular or "centri-lobular" or panacinar or "pan-acinar" or panlobular or "pan-lobular" ) )                                                                                                  |                               | Screen - Advanced Search Database - CINAHL Plus with Full Text                                                 |        |
| S32 | TI ( chronic N2 obstructi* N3 (pulmonary or airway* or air way* or lung or lungs or airflow* or air flow* or bronchitis or bronchopulmonar* or broncho-pulmonar* ) OR AB ( chronic N2 obstructi* N3 (pulmonary or airway* or air way* or lung or lungs or airflow* or air flow* or bronchitis or bronchopulmonar* or broncho-pulmonar* ) ) | Search modes - Boolean/Phrase | Interface - EBSCOhost Research Databases Search Screen - Advanced Search Database - CINAHL Plus with Full Text | 17,432 |
| S31 | MH "Pulmonary Disease, Chronic Obstructive+"                                                                                                                                                                                                                                                                                               | Search modes - Boolean/Phrase | Interface - EBSCOhost Research Databases Search Screen - Advanced Search Database - CINAHL Plus with Full Text | 21,169 |
| S30 | TI "colitis gravis" OR AB "colitis gravis"                                                                                                                                                                                                                                                                                                 | Search modes - Boolean/Phrase | Interface - EBSCOhost Research Databases Search Screen - Advanced Search Database - CINAHL Plus with Full Text | 0      |

|     |                                                                                                                       |                               |                                                                                                                |    |
|-----|-----------------------------------------------------------------------------------------------------------------------|-------------------------------|----------------------------------------------------------------------------------------------------------------|----|
| S29 | TI ( c(proctocolitis or "procto-colitis") N2 idiopathic ) OR AB ( (proctocolitis or "procto-colitis") N2 idiopathic ) | Search modes - Boolean/Phrase | Interface - EBSCOhost Research Databases Search Screen - Advanced Search Database - CINAHL Plus with Full Text | 0  |
| S28 | TI ( (proctocolitis or "procto-colitis") N2 idiopathic ) OR AB ( (proctocolitis or "procto-colitis") N2 idiopathic )  | Search modes - Boolean/Phrase | Interface - EBSCOhost Research Databases Search Screen - Advanced Search Database - CINAHL Plus with Full Text | 0  |
| S27 | TI ( Ileocolitis or "ileo-colitis" ) OR AB ( Ileocolitis or "ileo-colitis" )                                          | Search modes - Boolean/Phrase | Interface - EBSCOhost Research Databases Search Screen - Advanced Search Database - CINAHL Plus with Full Text | 27 |
| S26 | TI ( ileitis N2 (regional or terminal) ) OR AB ( ileitis N2 (regional or terminal) )                                  | Search modes - Boolean/Phrase | Interface - EBSCOhost Research Databases Search Screen - Advanced Search Database - CINAHL Plus                | 38 |

|     |                                                                              |                               |                                                                                                                |        |
|-----|------------------------------------------------------------------------------|-------------------------------|----------------------------------------------------------------------------------------------------------------|--------|
|     |                                                                              |                               | with Full Text                                                                                                 |        |
| S25 | TI ( Crohn or "Crohn's" ) OR AB ( Crohn or "Crohn's" )                       | Search modes - Boolean/Phrase | Interface - EBSCOhost Research Databases Search Screen - Advanced Search Database - CINAHL Plus with Full Text | 7,360  |
| S24 | TI IBD OR AB IBD                                                             | Search modes - Boolean/Phrase | Interface - EBSCOhost Research Databases Search Screen - Advanced Search Database - CINAHL Plus with Full Text | 4,539  |
| S23 | TI ( inflam* N1 (bowel* or colon* ) OR AB ( inflam* N1 (bowel* or colon* ) ) | Search modes - Boolean/Phrase | Interface - EBSCOhost Research Databases Search Screen - Advanced Search Database - CINAHL Plus with Full Text | 9,032  |
| S22 | MH "Inflammatory Bowel Diseases+"                                            | Search modes - Boolean/Phrase | Interface - EBSCOhost Research Databases Search Screen - Advanced                                              | 15,541 |



|     |                                                                                                                                                                                                                                                                                                                                                                                                                                                                                                                                      |                               |                                                                                                                |        |
|-----|--------------------------------------------------------------------------------------------------------------------------------------------------------------------------------------------------------------------------------------------------------------------------------------------------------------------------------------------------------------------------------------------------------------------------------------------------------------------------------------------------------------------------------------|-------------------------------|----------------------------------------------------------------------------------------------------------------|--------|
|     |                                                                                                                                                                                                                                                                                                                                                                                                                                                                                                                                      |                               | Search Database - CINAHL Plus with Full Text                                                                   |        |
| S21 | TI ( dyslipidemi* or dyslipoproteinemi* or dyslipo-proteinemi* or hyperlipemi* or hyperlipid#emi* or hyper-lipemi* or hyper-lipid#emi* or lipemi* or lipid#emi* or hypercholester#emi* or hypercholester#emi* or hypertriglyceridemi* or hyper-triglyceridemi* ) OR AB ( dyslipidemi* or dyslipoproteinemi* or dyslipo-proteinemi* or hyperlipemi* or hyperlipid#emi* or hyper-lipemi* or hyper-lipid#emi* or lipemi* or lipid#emi* or hypercholester#emi* or hypercholester#emi* or hypertriglyceridemi* or hyper-triglyceridemi* ) | Search modes - Boolean/Phrase | Interface - EBSCOhost Research Databases Search Screen - Advanced Search Database - CINAHL Plus with Full Text | 15,450 |
| S20 | MH "Hyperlipidemia+"                                                                                                                                                                                                                                                                                                                                                                                                                                                                                                                 | Search modes - Boolean/Phrase | Interface - EBSCOhost Research Databases Search Screen - Advanced Search Database - CINAHL Plus with Full Text | 21,692 |
| S19 | TI ( IDDM or NIDDM ) OR AB ( IDDM or NIDDM )                                                                                                                                                                                                                                                                                                                                                                                                                                                                                         | Search modes - Boolean/Phrase | Interface - EBSCOhost Research Databases Search Screen - Advanced Search Database - CINAHL Plus with Full Text | 2,337  |
| S18 | TI ( ("Type 1" or "Type I" or "Type 2" or "Type II" or ID or NID) W0 DM ) ) OR AB ( ("Type 1" or                                                                                                                                                                                                                                                                                                                                                                                                                                     | Search modes - Boolean/Phrase | Interface - EBSCOhost Research                                                                                 | 1,064  |

|     |                                                                                                        |                                  |                                                                                                                                                 |         |
|-----|--------------------------------------------------------------------------------------------------------|----------------------------------|-------------------------------------------------------------------------------------------------------------------------------------------------|---------|
|     | "Type I" or "Type 2" or "Type II" or ID or NID)<br>W0 DM ) )                                           |                                  | Databases<br>Search<br>Screen -<br>Advanced<br>Search<br>Database -<br>CINAHL Plus<br>with Full<br>Text                                         |         |
| S17 | TI diabet* OR AB diabet*                                                                               | Search modes -<br>Boolean/Phrase | Interface -<br>EBSCOhost<br>Research<br>Databases<br>Search<br>Screen -<br>Advanced<br>Search<br>Database -<br>CINAHL Plus<br>with Full<br>Text | 207,171 |
| S16 | (MH "Diabetes Mellitus") OR (MH "Diabetes<br>Mellitus, Type 1") OR (MH "Diabetes Mellitus,<br>Type 2") | Search modes -<br>Boolean/Phrase | Interface -<br>EBSCOhost<br>Research<br>Databases<br>Search<br>Screen -<br>Advanced<br>Search<br>Database -<br>CINAHL Plus<br>with Full<br>Text | 148,760 |
| S15 | TI ( CKD or CKDs ) OR AB ( CKD or CKDs )                                                               | Search modes -<br>Boolean/Phrase | Interface -<br>EBSCOhost<br>Research<br>Databases<br>Search<br>Screen -<br>Advanced<br>Search<br>Database -<br>CINAHL Plus<br>with Full<br>Text | 9,008   |

|     |                                                                                                                                                                                                                                                                                                                                                                                                                                                                                                                                                                |                               |                                                                                                                |         |
|-----|----------------------------------------------------------------------------------------------------------------------------------------------------------------------------------------------------------------------------------------------------------------------------------------------------------------------------------------------------------------------------------------------------------------------------------------------------------------------------------------------------------------------------------------------------------------|-------------------------------|----------------------------------------------------------------------------------------------------------------|---------|
| S14 | TI ( chronic N2 (renal or kidney*) N3 (condition* or disease* or disorder* or fail* or insufficien*) ) OR AB ( chronic N2 (renal or kidney*) N3 (condition* or disease* or disorder* or fail* or insufficien*) )                                                                                                                                                                                                                                                                                                                                               | Search modes - Boolean/Phrase | Interface - EBSCOhost Research Databases Search Screen - Advanced Search Database - CINAHL Plus with Full Text | 20,525  |
| S13 | MH "Renal Insufficiency, Chronic"                                                                                                                                                                                                                                                                                                                                                                                                                                                                                                                              | Search modes - Boolean/Phrase | Interface - EBSCOhost Research Databases Search Screen - Advanced Search Database - CINAHL Plus with Full Text | 28,632  |
| S12 | TI ( adenoma* or adenocarcinoma* or adeno-carcinoma* or blastoma* or carcinosarcoma* or carcino-sarcoma* or hematoma* or hepatoblastoma* or hepato-blastoma* or leukemia* or leukaemia* or lymphoma* or melanoma* or mesenchymoma* or mesothelioma* or sarcoma* or thymoma* ) OR AB ( adenoma* or adenocarcinoma* or adeno-carcinoma* or blastoma* or carcinosarcoma* or carcino-sarcoma* or hematoma* or hepatoblastoma* or hepato-blastoma* or leukemia* or leukaemia* or lymphoma* or melanoma* or mesenchymoma* or mesothelioma* or sarcoma* or thymoma* ) | Search modes - Boolean/Phrase | Interface - EBSCOhost Research Databases Search Screen - Advanced Search Database - CINAHL Plus with Full Text | 56,415  |
| S11 | TI ( neoplas* or cancer* or tumour* or tumor* or carcinoma* or malignan* or metasta* or oncolog* ) OR AB ( neoplas* or cancer* or tumour* or tumor* or carcinoma* or malignan* or metasta* or oncolog* )                                                                                                                                                                                                                                                                                                                                                       | Search modes - Boolean/Phrase | Interface - EBSCOhost Research Databases Search Screen - Advanced Search                                       | 601,907 |

|     |                                                                                                                                                                                                                                                                                                                                                                                                                                                                                                                                                                                                                                                                                                                                                                                                                                                                             |                                  |                                                                                                                                                 |         |
|-----|-----------------------------------------------------------------------------------------------------------------------------------------------------------------------------------------------------------------------------------------------------------------------------------------------------------------------------------------------------------------------------------------------------------------------------------------------------------------------------------------------------------------------------------------------------------------------------------------------------------------------------------------------------------------------------------------------------------------------------------------------------------------------------------------------------------------------------------------------------------------------------|----------------------------------|-------------------------------------------------------------------------------------------------------------------------------------------------|---------|
|     |                                                                                                                                                                                                                                                                                                                                                                                                                                                                                                                                                                                                                                                                                                                                                                                                                                                                             |                                  | Database -<br>CINAHL Plus<br>with Full<br>Text                                                                                                  |         |
| S10 | MH "Neoplasms+"                                                                                                                                                                                                                                                                                                                                                                                                                                                                                                                                                                                                                                                                                                                                                                                                                                                             | Search modes -<br>Boolean/Phrase | Interface -<br>EBSCOhost<br>Research<br>Databases<br>Search<br>Screen -<br>Advanced<br>Search<br>Database -<br>CINAHL Plus<br>with Full<br>Text | 571,926 |
| S9  | TI ( (chronic* or constant* or continual* or<br>continuous* or ceaseless* or endless* or<br>incessant* or interminabl* or intractable or<br>longterm or "long-term" or nonstop* or non-<br>stop* or perpetual* or persist* or recur* or<br>refractory or sustained or relentless* or<br>unabat* or unceasing or unending or<br>uninterrupt* or unrelenting or unrelieved or<br>unremitt*) N3 (neuralgi* or neuropath* or<br>pain*) ) OR AB ( (chronic* or constant* or<br>continual* or continuous* or ceaseless* or<br>endless* or incessant* or interminabl* or<br>intractable or longterm or "long-term" or<br>nonstop* or non-stop* or perpetual* or<br>persist* or recur* or refractory or sustained or<br>relentless* or unabat* or unceasing or<br>unending or uninterrupt* or unrelenting or<br>unrelieved or unremitt*) N3 (neuralgi* or<br>neuropath* or pain*) ) | Search modes -<br>Boolean/Phrase | Interface -<br>EBSCOhost<br>Research<br>Databases<br>Search<br>Screen -<br>Advanced<br>Search<br>Database -<br>CINAHL Plus<br>with Full<br>Text | 46,734  |
| S8  | (MH "Chronic Pain")                                                                                                                                                                                                                                                                                                                                                                                                                                                                                                                                                                                                                                                                                                                                                                                                                                                         | Search modes -<br>Boolean/Phrase | Interface -<br>EBSCOhost<br>Research<br>Databases<br>Search<br>Screen -<br>Advanced<br>Search<br>Database -<br>CINAHL Plus                      | 23,373  |

|    |                                                                                                                                                                                                                                                                                                                                                                              |                               |                                                                                                                |        |
|----|------------------------------------------------------------------------------------------------------------------------------------------------------------------------------------------------------------------------------------------------------------------------------------------------------------------------------------------------------------------------------|-------------------------------|----------------------------------------------------------------------------------------------------------------|--------|
|    |                                                                                                                                                                                                                                                                                                                                                                              |                               | with Full Text                                                                                                 |        |
| S7 | TI asthma* OR AB asthma*                                                                                                                                                                                                                                                                                                                                                     | Search modes - Boolean/Phrase | Interface - EBSCOhost Research Databases Search Screen - Advanced Search Database - CINAHL Plus with Full Text | 39,408 |
| S6 | (MH "Asthma+")                                                                                                                                                                                                                                                                                                                                                               | Search modes - Boolean/Phrase | Interface - EBSCOhost Research Databases Search Screen - Advanced Search Database - CINAHL Plus with Full Text | 36,911 |
| S5 | TI ( arthriti* or arthros?s or osteoarthritis* or osteo-arthriti* or osteoarthros?s or osteo-arthros?s or polyarthriti* or poly-arthriti* or spondylarthriti* or spondyl-arthriti* ) OR AB ( arthriti* or arthros?s or osteoarthritis* or osteo-arthriti* or osteoarthros?s or osteo-arthros?s or polyarthriti* or poly-arthriti* or spondylarthriti* or spondyl-arthriti* ) | Search modes - Boolean/Phrase | Interface - EBSCOhost Research Databases Search Screen - Advanced Search Database - CINAHL Plus with Full Text | 72,634 |
| S4 | (MH "Arthritis+")                                                                                                                                                                                                                                                                                                                                                            | Search modes - Boolean/Phrase | Interface - EBSCOhost Research Databases Search Screen - Advanced                                              | 78,840 |

|    |                                                                                                                                                                                                                                                                                                                                                                                                                                                                                                                    |                               |                                                                                                                |         |
|----|--------------------------------------------------------------------------------------------------------------------------------------------------------------------------------------------------------------------------------------------------------------------------------------------------------------------------------------------------------------------------------------------------------------------------------------------------------------------------------------------------------------------|-------------------------------|----------------------------------------------------------------------------------------------------------------|---------|
|    |                                                                                                                                                                                                                                                                                                                                                                                                                                                                                                                    |                               | Search Database - CINAHL Plus with Full Text                                                                   |         |
| S3 | S1 OR S2                                                                                                                                                                                                                                                                                                                                                                                                                                                                                                           | Search modes - Boolean/Phrase | Interface - EBSCOhost Research Databases Search Screen - Advanced Search Database - CINAHL Plus with Full Text | 180,624 |
| S2 | TI ( (chronic* or longterm or "long-term" or longstanding or "long-standing" or ongoing or persisten*) N2 (comorbid* or (co W0 morbid*) or condition* or disabilit* or disease* or disorder* or ill or illness* or morbidit* or syndrom* or symptom*) ) OR AB ( (chronic* or longterm or "long-term" or longstanding or "long-standing" or ongoing or persisten*) N2 (comorbid* or (co W0 morbid*) or condition* or disabilit* or disease* or disorder* or ill or illness* or morbidit* or syndrom* or symptom*) ) | Search modes - Boolean/Phrase | Interface - EBSCOhost Research Databases Search Screen - Advanced Search Database - CINAHL Plus with Full Text | 138,197 |
| S1 | (MH "Chronic Disease+")                                                                                                                                                                                                                                                                                                                                                                                                                                                                                            | Search modes - Boolean/Phrase | Interface - EBSCOhost Research Databases Search Screen - Advanced Search Database - CINAHL Plus with Full Text | 68,313  |

Web of Science

# 30 [500](#) #28 AND #24

- 1  
2  
3  
4  
5  
6  
7  
8  
9  
10  
11  
12  
13  
14  
15  
16  
17  
18  
19  
20  
21  
22  
23  
24  
25  
26  
27  
28  
29  
30  
31  
32  
33  
34  
35  
36  
37  
38  
39  
40  
41  
42  
43  
44  
45  
46  
47  
48  
49  
50  
51  
52  
53  
54  
55  
56  
57  
58  
59  
60
- Refined by: PUBLICATION YEARS:** ( 2020 OR 2014 OR 2019 OR 2013 OR 2018 OR 2012 OR 2017 OR 2011 OR 2016 OR 2010 OR 2015 )  
Indexes=SCI-EXPANDED, SSCI, A&HCI, CPCI-S, CPCI-SSH, BKCI-S, BKCI-SSH, ESCI  
Timespan=All years
- # 29 [563](#) #28 AND #24  
Indexes=SCI-EXPANDED, SSCI, A&HCI, CPCI-S, CPCI-SSH, BKCI-S, BKCI-SSH, ESCI  
Timespan=All years
- # 28 [555,169](#) #27 OR #26 OR #25  
Indexes=SCI-EXPANDED, SSCI, A&HCI, CPCI-S, CPCI-SSH, BKCI-S, BKCI-SSH, ESCI  
Timespan=All years
- # 27 [16,091](#) TS=("network MA" or "network MAs") OR TS=(NMA or NMAs or MTC or MTCs or MAIC or MAICs) OR TS=(indirect\* NEAR/0 compar\*) OR TS=(("indirect treatment" or "indirect treatments") NEAR/1 compar\*) OR TS=(("mixed treatment" or "mixed treatments") NEAR/1 compar\*) OR TS=(("multiple treatment" or "multiple treatments") NEAR/1 compar\*) OR TS=(("multi treatment" or "multi treatments") NEAR/1 compar\*) OR TS=(simultaneous\* NEAR/0 compar\*) OR TS=(mixed NEAR/0 comparison\*)  
Indexes=SCI-EXPANDED, SSCI, A&HCI, CPCI-S, CPCI-SSH, BKCI-S, BKCI-SSH, ESCI  
Timespan=All years
- # 26 [15,279](#) **TOPIC:** ("meta-review" or "meta-reviews" or "meta-overview" or "meta-overviews" or (meta NEAR/0 synthes\*)) ) OR **TOPIC:** ("rapid review" or "rapid reviews" or "review of reviews" or "umbrella review" or "umbrella reviews" or "technology assessment" or "technology assessments" or HTA or HTAs)  
Indexes=SCI-EXPANDED, SSCI, A&HCI, CPCI-S, CPCI-SSH, BKCI-S, BKCI-SSH, ESCI  
Timespan=All years
- # 25 [530,270](#) **TOPIC:** ((meta NEAR/0 analy\*) or metanaly\* or metaanaly\* or (met NEAR/0 analy\*)) ) OR **TOPIC:** (integrative NEAR/0 (research or review\* or overview\*)) ) OR **TOPIC:** (research NEAR/0 (integration or overview\*)) ) OR **TOPIC:** (collaborative NEAR/0 review\*) ) OR **TOPIC:** ("systematic review" or "systematic reviews" or "systematic overview" or "systematic overviews") ) OR **TOPIC:** ("evidence-based review" or "evidence-based reviews" or "evidence-based overview" or "evidence-based overviews") ) OR **TOPIC:** (evidence NEAR/3 (review\* or overview\*)) )  
Indexes=SCI-EXPANDED, SSCI, A&HCI, CPCI-S, CPCI-SSH, BKCI-S, BKCI-SSH, ESCI  
Timespan=All years
- # 24 [5,800](#) #23 AND #16  
Indexes=SCI-EXPANDED, SSCI, A&HCI, CPCI-S, CPCI-SSH, BKCI-S, BKCI-SSH, ESCI  
Timespan=All years
- # 23 [688,715](#) #22 OR #21 OR #20 OR #19 OR #18 OR #17  
Indexes=SCI-EXPANDED, SSCI, A&HCI, CPCI-S, CPCI-SSH, BKCI-S, BKCI-SSH, ESCI  
Timespan=All years
- # 22 [64,468](#) **TOPIC:** (ehealth or "e-health" or mhealth or "m-health" or "mobile health") ) OR **TOPIC:** (telecare or "tele-care" or teleconsult\* or (tele NEAR/0 consult\*) or telecounsel\* or (tele NEAR/0 counsel\*) or telehome\* or (tele NEAR/0 home\*) or telemed\* or (tele NEAR/0 med\*) or telemonitor\* or (tele NEAR/0

- monitor\*) or telenurs\* or (tele NEAR/0 nurs\*) or telepsychiatr\* or (tele NEAR/0 psychiatr\*) or telerehab\* or (tele NEAR/0 rehab\*) ) OR **TOPIC:** (remote\* NEAR/3 (care or healthcare or "health care" or consult\* or counsel\* or interven\* or monitor\* or psychiatr\* or rehab\* or treat\* or therap\* ) )  
 Indexes=SCI-EXPANDED, SSCI, A&HCI, CPCI-S, CPCI-SSH, BKCI-S, BKCI-SSH, ESCI  
 Timespan=All years
- # 21 [92,415](#) **TOPIC:** ("electronic health record" or "electronic health records") OR **TOPIC:** (EHR or EHRs or EMR or EMRs or PHR or PHRs) OR **TOPIC:** (hotline or hotlines) OR **TOPIC:** (telecommunicat\* or (tele NEAR/0 communicat\* ) )  
 Indexes=SCI-EXPANDED, SSCI, A&HCI, CPCI-S, CPCI-SSH, BKCI-S, BKCI-SSH, ESCI  
 Timespan=All years
- # 20 [357,584](#) **TOPIC:** ((electronic NEAR/0 mail\*) or email\* or "e-mail" or "e-mails" or "e-mailed" or "e-mailing") OR **TOPIC:** (telephon\* or (tele NEAR/0 phon\*) or phone or phoned or phones or phoning or "answering service" or "answering services" or telefacsimile\* or (tele NEAR/0 facsimile) or "telefacsimiles" or FAX) OR **TOPIC:** (televis\* or (tele NEAR/0 vis\*) or TV or TVs or videorecord\* or (video NEAR/0 record\*) or videotap\* or (video NEAR/0 tap\* ) ) OR **TOPIC:** (videoconferenc\* or (video NEAR/0 conferenc\*) or videophon\* or (video NEAR/0 phon\* ) )  
 Indexes=SCI-EXPANDED, SSCI, A&HCI, CPCI-S, CPCI-SSH, BKCI-S, BKCI-SSH, ESCI  
 Timespan=All years
- # 19 [5,843](#) **TOPIC:** (patient\* NEAR/2 (portal or portals) ) OR **TOPIC:** (("health information" or "medical information" or "clinical information") NEAR/3 (portal or portals) ) OR **TOPIC:** (("health data" or "medical data" or "clinical data") NEAR/3 (portal or portals) ) OR **TOPIC:** ("health portal" or "health portals")  
 Indexes=SCI-EXPANDED, SSCI, A&HCI, CPCI-S, CPCI-SSH, BKCI-S, BKCI-SSH, ESCI  
 Timespan=All years
- # 18 [31,855](#) **TOPIC:** (digital\* NEAR/3 (care or healthcare or "health care" or interven\* or consult\* or counsel\* or monitor\* or psychiatr\* or rehab\* or treat\* or therap\* ) ) OR **TOPIC:** (("technology-based" or "technology-facilitated") NEAR/3 (care or healthcare or "health care" or interven\* or consult\* or counsel\* or monitor\* or psychiatr\* or rehab\* or treat\* or therap\* ) ) OR **TOPIC:** (video\* NEAR/3 (care or healthcare or "health care" or interven\* or consult\* or counsel\* or monitor\* or psychiatr\* or rehab\* or treat\* or therap\* ) ) OR **TOPIC:** (virtual\* NEAR/3 (care or healthcare or "health care" or interven\* or consult\* or counsel\* or monitor\* or psychiatr\* or rehab\* or treat\* or therap\* ) )  
 Indexes=SCI-EXPANDED, SSCI, A&HCI, CPCI-S, CPCI-SSH, BKCI-S, BKCI-SSH, ESCI  
 Timespan=All years
- # 17 [190,766](#) **TOPIC:** ((internet\* or online or web or "web-based" or "web-site" or website or www or cyber\* or smartphone\* or "smart phone" or "smart phones" or iphone\* or "i-phone" or "i-phones" or ipad or "i-pad" or ipads or "i-pads") NEAR/3 (care or deliver\* or healthcare or "health care" or consult\* or counsel\* or interven\* or monitor\* or psychiatr\* or rehab\* or service or services or treat\* or therap\* ) ) OR **TOPIC:** ((internet\* or online or web or "web-based" or "web-site" or website or www or cyber\* or smartphone\* or "smart phone" or "smart phones" or iphone\* or "i-phone" or "i-phones" or ipad or "i-pad" or ipads or "i-pads") NEAR/3 (app



or apps or application or applications) ) **OR TOPIC:** (mobile NEAR/3 (app or apps or application or applications) )

Indexes=SCI-EXPANDED, SSCI, A&HCI, CPCI-S, CPCI-SSH, BKCI-S, BKCI-SSH, ESCI

Timespan=All years

# 16 [283,795](#) #15 AND #9

Indexes=SCI-EXPANDED, SSCI, A&HCI, CPCI-S, CPCI-SSH, BKCI-S, BKCI-SSH, ESCI

Timespan=All years

# 15 [1,677,770](#) #14 OR #13 OR #12 OR #11 OR #10

Indexes=SCI-EXPANDED, SSCI, A&HCI, CPCI-S, CPCI-SSH, BKCI-S, BKCI-SSH, ESCI

Timespan=All years

# 14 [94,945](#) **TOPIC:** (PTSD) **OR TOPIC:** (ADDH or ADHD) **OR TOPIC:** ("stress disorder" NEAR/3 (trauma\* or posttrauma\* or post-trauma\*)) **OR TOPIC:** ("stress disorders" NEAR/3 (trauma\* or posttrauma\* or post-trauma\*)) **OR TOPIC:** (neurosis NEAR/3 (trauma\* or posttrauma\* or post-trauma\*)) **OR TOPIC:** (neuroses NEAR/3 (trauma\* or posttrauma\* or post-trauma\*))

Indexes=SCI-EXPANDED, SSCI, A&HCI, CPCI-S, CPCI-SSH, BKCI-S, BKCI-SSH, ESCI

Timespan=All years

# 13 [1,032,053](#) **TOPIC:** ("attention deficit" or "attention deficits") **OR TOPIC:** (ADDH or

ADHD) **OR TOPIC:** ((hyperkinetic or "hyper-

kinetic") NEAR/0 syndrome\*) **OR TOPIC:** (depress\*) **OR TOPIC:** (dysthym\*) **OR TOPIC:** ((feel\* NEAR/0 blue) or blues) **OR TOPIC:** (melanchol\*) **OR TOPIC:** (MDD and mental)

Indexes=SCI-EXPANDED, SSCI, A&HCI, CPCI-S, CPCI-SSH, BKCI-S, BKCI-SSH, ESCI

Timespan=All years

# 12 [73,711](#) TS=((neurocirculatory

NEAR/0 asthenia\*) or "cardiac neurosis" or "cardiac neuroses" or (effort NEAR/0

syndrome\*) or ("hyperkinetic heart" NEAR/0 syndrome\*)) **OR TS=**("neurotic

disorder" or "neurotic disorders" or neurosis or neuroses or psychoneurosis or ps

ychoneuroses or "psycho-neurosis" or "psycho-neuroses") **OR TS=**("obsessive-

compulsive" or (anankastic NEAR/0 personalit\*) or (compulsive NEAR/0

personalit\*) or (obsessive NEAR/0

personalit\*) or hoarding or psychastheni\*) **OR TS=**(panic NEAR/2 (disorder\* or

attack\*)) **OR TS=**(phobia or phobias or phobic) **OR TS=**(catastrophisation\*

or catastrophise\* or catastrophising or catastrophization\* or catastrophize\* or cat

astrophizing)

Indexes=SCI-EXPANDED, SSCI, A&HCI, CPCI-S, CPCI-SSH, BKCI-S, BKCI-SSH, ESCI

Timespan=All years

# 11 [741,658](#) **TOPIC:** ((affective or mood) NEAR/0 disorder\*) **OR TOPIC:** ((cyclothymic or "cyclo-

thymic") NEAR/0 (disorder\* or personalit\*)) **OR TOPIC:** (anxiety or anxieties or

anxious\*) **OR TOPIC:** (GAD) **OR TOPIC:** (hypervigilan\* or (hyper NEAR/0

vigilan\*) or nervous\*) **OR TOPIC:** ((incessan\* or obsessive\* or persistan\* or

intense\*) NEAR/3 fear\*) **OR TOPIC:** (agoraphobi\* or claustrophobi\* or homophobi\*

or neophobi\* or xenophobi\*)

Indexes=SCI-EXPANDED, SSCI, A&HCI, CPCI-S, CPCI-SSH, BKCI-S, BKCI-SSH, ESCI

Timespan=All years

- 1  
2  
3  
4 # 10 [29,399](#) **TOPIC:** ((emotional\* or mental\* or psychological\* or  
5 social\*) NEAR/2 health\* NEAR/3 (disorder\* or morbidit\* or comorbid\* or "co-  
6 morbidity" or "co-morbidities" or problem\* )  
7 Indexes=SCI-EXPANDED, SSCI, A&HCI, CPCI-S, CPCI-SSH, BKCI-S, BKCI-SSH, ESCI  
8 Timespan=All years
- 9 # 9 [7,741,29](#) #8 OR #7 OR #6 OR #5 OR #4 OR #3 OR #2 OR #1  
10 [8](#) Indexes=SCI-EXPANDED, SSCI, A&HCI, CPCI-S, CPCI-SSH, BKCI-S, BKCI-SSH, ESCI  
11 Timespan=All years
- 12 # 8 [710,621](#) **TOPIC:** (arterioscleros\* or arterio-scleros\* or atheroscleros\* or athero-  
13 scleros\*) OR **TOPIC:** (hypertens\*) OR **TOPIC:** ((elevated or  
14 high\*) NEAR/2 "blood pressure") OR **TOPIC:** ((elevated or  
15 high\*) NEAR/2 "blood pressures")  
16 Indexes=SCI-EXPANDED, SSCI, A&HCI, CPCI-S, CPCI-SSH, BKCI-S, BKCI-SSH, ESCI  
17 Timespan=All years
- 18 # 7 [1,370,78](#) **TOPIC:** ((artery or arteries or arterial or atrial\* or atrium\* or cardiac\* or cardio\* or  
19 cardiovascul\* or "cardio-vascular" or coronary or heart\* or myocard\* or  
20 ventricle\*) NEAR/3 (arrest\* or aneurysm\* or arrhythmia\* or arrhythmia\* or disease\* or  
21 disorder\* or dysrhythmia\* or dysrhythmia\* or dysfunction\* or failure\* or fibrillation\* or  
22 ischemi\* or infarction\* or obstruct\* or occlu\* or rupture\* or stenosis or stenoses or  
23 syndrom\* or thrombo\* or vasospas\* or "vaso-spasm" or "vaso-spasms" ) )  
24 Indexes=SCI-EXPANDED, SSCI, A&HCI, CPCI-S, CPCI-SSH, BKCI-S, BKCI-SSH, ESCI  
25 Timespan=All years
- 26 # 6 [71,527](#) **TOPIC:** (emphysema NEAR/3 (pulmonary or airway\* or "air way" or "air ways" or lung  
27 or lungs or airflow\* or "air flow" or "air flows" or bronchitis or bronchopulmonar\* or  
28 "broncho-pulmonary" ) ) OR **TOPIC:** (COAD or COPD)  
29 Indexes=SCI-EXPANDED, SSCI, A&HCI, CPCI-S, CPCI-SSH, BKCI-S, BKCI-SSH, ESCI  
30 Timespan=All years
- 31 # 5 [54,369](#) **TOPIC:** ("chronic obstructive" NEAR/3 (pulmonary or airway\* or "air way" or "air ways"  
32 or lung or lungs or airflow\* or "air flow" or "air flows" or bronchitis or  
33 bronchopulmonar\* or "broncho-pulmonary" ) )  
34 Indexes=SCI-EXPANDED, SSCI, A&HCI, CPCI-S, CPCI-SSH, BKCI-S, BKCI-SSH, ESCI  
35 Timespan=All years
- 36 # 4 [200,828](#) TS=(dyslipidemi\* or dyslipoproteinemi\* or dyslipo-  
37 proteinemi\* or hyperlipemi\* or hyperlipidaemi\* or hyperlipidemi\* or hyper-  
38 lipemi\* or hyper-lipidaemi\* or hyper-  
39 lipidemi\* or lipemi\* or lipidaemi\* or lipidemi\* or hypercholesteraeami\* or hyperchol-  
40 esteremi\* or hyper-cholesteraeami\* or hyper-  
41 cholesteremi\* or hypertriglyceridemi\* or hyper-triglyceridemi\*) OR TS=(inflam\*  
42 NEAR/1 (bowel\* or colon\* ) ) OR TS=(IBD) OR TS=(Crohn or "Crohn's") OR TS=(ileitis  
43 NEAR/2 (regional or terminal) ) OR TS=(Ileocolitis or "ileo-  
44 colitis") OR TS=((proctocolitis or procto-  
45 colitis) NEAR/2 idiopathic) OR TS=((colorectitis or proctocolitis or procto-  
46 colitis) NEAR/2 (ulcer\* or mucosal) ) OR TS=("colitis gravis")  
47 Indexes=SCI-EXPANDED, SSCI, A&HCI, CPCI-S, CPCI-SSH, BKCI-S, BKCI-SSH, ESCI  
48 Timespan=All years  
49  
50  
51  
52  
53  
54  
55  
56  
57  
58  
59  
60

- 1  
2  
3 # 3 [867,623](#) **TOPIC:** ((chronic NEAR/2 (renal or kidney\*) NEAR/3 (condition\* or disease\* or  
4 disorder\* or fail\* or insufficien\*)) ) **OR TOPIC:** (CKD or  
5 CKDs) **OR TOPIC:** (diabet\*) **OR TOPIC:** ("Type 1" or "Type I" or "Type 2" or "Type II"  
6 or ID or NID) NEAR/0 DM) **OR TOPIC:** (IDDM or NIDDM)  
7 Indexes=SCI-EXPANDED, SSCI, A&HCI, CPCI-S, CPCI-SSH, BKCI-S, BKCI-SSH, ESCI  
8 Timespan=All years  
9
- 10 # 2 [4,527,936](#) **TOPIC:** (neoplas\* or cancer\* or tumour\* or tumor\* or carcinoma\* or malignan\* or  
11 metasta\* or oncolog\*) **OR TOPIC:** (adenoma\* or adenocarcinoma\* or adeno-  
12 carcinoma\* or blastoma\* or carcinosarcoma\* or carcino-sarcoma\* or hematoma\* or  
13 hepatoblastoma\* or hepato-blastoma\* or leukemia\* or leukaemia\* or lymphoma\* or  
14 melanoma\* or mesenchymoma\* or mesothelioma\* or sarcoma\* or thymoma\*)  
15 Indexes=SCI-EXPANDED, SSCI, A&HCI, CPCI-S, CPCI-SSH, BKCI-S, BKCI-SSH, ESCI  
16 Timespan=All years  
17
- 18 # 1 [1,063,650](#) **TOPIC:** ((chronic\* or longterm or "long-term" or longstanding or "long-standing" or  
19 ongoing or persisten\*) NEAR/2 (comorbid\* or co-morbid\* or condition\* or disabilit\* or  
20 disease\* or disorder\* or ill or illness\* or morbidit\* or syndrom\* or  
21 symptom\*)) **OR TOPIC:** (arthriti\* or arthrosis or arthroses or osteoarthritis\* or osteo-  
22 arthriti\* or osteoarthros\* or osteo-arthros\* or polyarthriti\* or poly-arthriti\* or  
23 spondylarthriti\* or spondyl-arthriti\*) **OR TOPIC:** (asthma\*) **OR TOPIC:** ((chronic\* or  
24 constant\* or continual\* or continuous\* or ceaseless\* or endless\* or incessant\* or  
25 interminabl\* or intractable or longterm or "long-term" or nonstop\* or "non-stop" or  
26 perpetual\* or persist\* or recur\* or refractory or sustained or relentless\* or unabat\* or  
27 unceasing or unending or uninterrupt\* or unrelenting or unrelieved or  
28 unremitt\*) NEAR/3 (neuralgi\* or neuropath\* or pain\*))  
29 Indexes=SCI-EXPANDED, SSCI, A&HCI, CPCI-S, CPCI-SSH, BKCI-S, BKCI-SSH, ESCI  
30 Timespan=All years  
31  
32  
33  
34  
35  
36  
37  
38  
39  
40  
41  
42  
43  
44  
45  
46  
47  
48  
49  
50  
51  
52  
53  
54  
55  
56  
57  
58  
59  
60

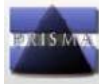

# PRISMA 2009 Checklist

1  
2  
3  
4  
5  
6  
7  
8  
9  
10  
11  
12  
13  
14  
15  
16  
17  
18  
19  
20  
21  
22  
23  
24  
25  
26  
27  
28  
29  
30  
31  
32  
33  
34  
35  
36  
37  
38  
39  
40  
41  
42  
43  
44  
45  
46  
47

| Section/topic                      | #  | Checklist item                                                                                                                                                                                                                                                                                              | Reported on page # |
|------------------------------------|----|-------------------------------------------------------------------------------------------------------------------------------------------------------------------------------------------------------------------------------------------------------------------------------------------------------------|--------------------|
| <b>TITLE</b>                       |    |                                                                                                                                                                                                                                                                                                             |                    |
| Title                              | 1  | Identify the report as a systematic review, meta-analysis, or both.                                                                                                                                                                                                                                         | 1                  |
| <b>ABSTRACT</b>                    |    |                                                                                                                                                                                                                                                                                                             |                    |
| Structured summary                 | 2  | Provide a structured summary including, as applicable: background; objectives; data sources; study eligibility criteria, participants, and interventions; study appraisal and synthesis methods; results; limitations; conclusions and implications of key findings; systematic review registration number. | 2                  |
| <b>INTRODUCTION</b>                |    |                                                                                                                                                                                                                                                                                                             |                    |
| Rationale                          | 3  | Describe the rationale for the review in the context of what is already known.                                                                                                                                                                                                                              | 3                  |
| Objectives                         | 4  | Provide an explicit statement of questions being addressed with reference to participants, interventions, comparisons, outcomes, and study design (PICOS).                                                                                                                                                  | 3                  |
| <b>METHODS</b>                     |    |                                                                                                                                                                                                                                                                                                             |                    |
| Protocol and registration          | 5  | Indicate if a review protocol exists, if and where it can be accessed (e.g., Web address), and, if available, provide registration information including registration number.                                                                                                                               | 1                  |
| Eligibility criteria               | 6  | Specify study characteristics (e.g., PICOS, length of follow-up) and report characteristics (e.g., years considered, language, publication status) used as criteria for eligibility, giving rationale.                                                                                                      | 3                  |
| Information sources                | 7  | Describe all information sources (e.g., databases with dates of coverage, contact with study authors to identify additional studies) in the search and date last searched.                                                                                                                                  | 3-4                |
| Search                             | 8  | Present full electronic search strategy for at least one database, including any limits used, such that it could be repeated.                                                                                                                                                                               | Add file 2         |
| Study selection                    | 9  | State the process for selecting studies (i.e., screening, eligibility, included in systematic review, and, if applicable, included in the meta-analysis).                                                                                                                                                   | 4                  |
| Data collection process            | 10 | Describe method of data extraction from reports (e.g., piloted forms, independently, in duplicate) and any processes for obtaining and confirming data from investigators.                                                                                                                                  | 4                  |
| Data items                         | 11 | List and define all variables for which data were sought (e.g., PICOS, funding sources) and any assumptions and simplifications made.                                                                                                                                                                       | 4                  |
| Risk of bias in individual studies | 12 | Describe methods used for assessing risk of bias of individual studies (including specification of whether this was done at the study or outcome level), and how this information is to be used in any data synthesis.                                                                                      | 4                  |
| Summary measures                   | 13 | State the principal summary measures (e.g., risk ratio, difference in means).                                                                                                                                                                                                                               | NA                 |
| Synthesis of results               | 14 | Describe the methods of handling data and combining results of studies, if done, including measures of consistency (e.g., I <sup>2</sup> ) for each meta-analysis.                                                                                                                                          | NA                 |

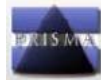

# PRISMA 2009 Checklist

Page 1 of 2

| Section/topic                 | #  | Checklist item                                                                                                                                                                                           | Reported on page # |
|-------------------------------|----|----------------------------------------------------------------------------------------------------------------------------------------------------------------------------------------------------------|--------------------|
| Risk of bias across studies   | 15 | Specify any assessment of risk of bias that may affect the cumulative evidence (e.g., publication bias, selective reporting within studies).                                                             | 4                  |
| Additional analyses           | 16 | Describe methods of additional analyses (e.g., sensitivity or subgroup analyses, meta-regression), if done, indicating which were pre-specified.                                                         | NA                 |
| <b>RESULTS</b>                |    |                                                                                                                                                                                                          |                    |
| Study selection               | 17 | Give numbers of studies screened, assessed for eligibility, and included in the review, with reasons for exclusions at each stage, ideally with a flow diagram.                                          | 4,8                |
| Study characteristics         | 18 | For each study, present characteristics for which data were extracted (e.g., study size, PICOS, follow-up period) and provide the citations.                                                             | 11-17              |
| Risk of bias within studies   | 19 | Present data on risk of bias of each study and, if available, any outcome level assessment (see item 12).                                                                                                | 18                 |
| Results of individual studies | 20 | For all outcomes considered (benefits or harms), present, for each study: (a) simple summary data for each intervention group (b) effect estimates and confidence intervals, ideally with a forest plot. | 11-17              |
| Synthesis of results          | 21 | Present results of each meta-analysis done, including confidence intervals and measures of consistency.                                                                                                  | NA                 |
| Risk of bias across studies   | 22 | Present results of any assessment of risk of bias across studies (see Item 15).                                                                                                                          | 18                 |
| Additional analysis           | 23 | Give results of additional analyses, if done (e.g., sensitivity or subgroup analyses, meta-regression [see Item 16]).                                                                                    | 19                 |
| <b>DISCUSSION</b>             |    |                                                                                                                                                                                                          |                    |
| Summary of evidence           | 24 | Summarize the main findings including the strength of evidence for each main outcome; consider their relevance to key groups (e.g., healthcare providers, users, and policy makers).                     | 6-7                |
| Limitations                   | 25 | Discuss limitations at study and outcome level (e.g., risk of bias), and at review-level (e.g., incomplete retrieval of identified research, reporting bias).                                            | 7                  |
| Conclusions                   | 26 | Provide a general interpretation of the results in the context of other evidence, and implications for future research.                                                                                  | 7                  |
| <b>FUNDING</b>                |    |                                                                                                                                                                                                          |                    |
| Funding                       | 27 | Describe sources of funding for the systematic review and other support (e.g., supply of data); role of funders for the systematic review.                                                               | 1                  |

From: Moher D, Liberati A, Tetzlaff J, Altman DG, The PRISMA Group (2009). Preferred Reporting Items for Systematic Reviews and Meta-Analyses: The PRISMA Statement. PLoS Med 6(7): e1000097. doi:10.1371/journal.pmed1000097

For more information, visit: [www.prisma-statement.org](http://www.prisma-statement.org).

Page 2 of 2

For peer review only - <http://bmjopen.bmj.com/site/about/guidelines.xhtml>

# BMJ Open

## Digital health interventions for the management of mental health in people with chronic diseases: a rapid review.

|                                 |                                                                                                                                                                                                                                                                                                                                                                                                                                                                                                                                                                                                                                                                                                                                                                                                                                                                                                                                                                                                        |
|---------------------------------|--------------------------------------------------------------------------------------------------------------------------------------------------------------------------------------------------------------------------------------------------------------------------------------------------------------------------------------------------------------------------------------------------------------------------------------------------------------------------------------------------------------------------------------------------------------------------------------------------------------------------------------------------------------------------------------------------------------------------------------------------------------------------------------------------------------------------------------------------------------------------------------------------------------------------------------------------------------------------------------------------------|
| Journal:                        | <i>BMJ Open</i>                                                                                                                                                                                                                                                                                                                                                                                                                                                                                                                                                                                                                                                                                                                                                                                                                                                                                                                                                                                        |
| Manuscript ID                   | bmjopen-2020-044437.R1                                                                                                                                                                                                                                                                                                                                                                                                                                                                                                                                                                                                                                                                                                                                                                                                                                                                                                                                                                                 |
| Article Type:                   | Original research                                                                                                                                                                                                                                                                                                                                                                                                                                                                                                                                                                                                                                                                                                                                                                                                                                                                                                                                                                                      |
| Date Submitted by the Author:   | 18-Jan-2021                                                                                                                                                                                                                                                                                                                                                                                                                                                                                                                                                                                                                                                                                                                                                                                                                                                                                                                                                                                            |
| Complete List of Authors:       | Sasseville, Maxime; Université du Québec à Chicoutimi, Health Sciences; Université Laval, Nursing<br>LeBlanc, Annie; VITAM Research Center on Sustainable Health; Université Laval<br>Boucher, Mylène; VITAM Research Center on Sustainable Health<br>Dugas, Michèle ; VITAM Research Center on Sustainable Health<br>Mbemba, Gisele; VITAM Research Center on Sustainable Health<br>Tchuenta, Jack; VITAM Research Center on Sustainable Health<br>Chouinard, Maud-Christine; Université de Montréal<br>Beaulieu, Marianne; Université Laval<br>Beaudet, Nicolas ; Omnimed; Université de Sherbrooke<br>Skidmore, Becky; Independent Information Specialist<br>Cholette, Pascale ; Centre intégré universitaire de santé et de services sociaux de la Capitale-Nationale du Québec<br>Aspiros, Christine; Patient partner<br>Larouche, Alain; Groupe Santé Concerto<br>Chabot, Guylaine; Groupe Santé Concerto<br>Gagnon, Marie-Pierre; Université Laval; VITAM Research Center on Sustainable Health |
| <b>Primary Subject Heading</b>: | Health informatics                                                                                                                                                                                                                                                                                                                                                                                                                                                                                                                                                                                                                                                                                                                                                                                                                                                                                                                                                                                     |
| Secondary Subject Heading:      | Mental health, General practice / Family practice, Health services research                                                                                                                                                                                                                                                                                                                                                                                                                                                                                                                                                                                                                                                                                                                                                                                                                                                                                                                            |
| Keywords:                       | MENTAL HEALTH, Health informatics < BIOTECHNOLOGY & BIOINFORMATICS, GENERAL MEDICINE (see Internal Medicine)                                                                                                                                                                                                                                                                                                                                                                                                                                                                                                                                                                                                                                                                                                                                                                                                                                                                                           |
|                                 |                                                                                                                                                                                                                                                                                                                                                                                                                                                                                                                                                                                                                                                                                                                                                                                                                                                                                                                                                                                                        |

SCHOLARONE™  
Manuscripts



I, the Submitting Author has the right to grant and does grant on behalf of all authors of the Work (as defined in the below author licence), an exclusive licence and/or a non-exclusive licence for contributions from authors who are: i) UK Crown employees; ii) where BMJ has agreed a CC-BY licence shall apply, and/or iii) in accordance with the terms applicable for US Federal Government officers or employees acting as part of their official duties; on a worldwide, perpetual, irrevocable, royalty-free basis to BMJ Publishing Group Ltd ("BMJ") its licensees and where the relevant Journal is co-owned by BMJ to the co-owners of the Journal, to publish the Work in this journal and any other BMJ products and to exploit all rights, as set out in our [licence](#).

The Submitting Author accepts and understands that any supply made under these terms is made by BMJ to the Submitting Author unless you are acting as an employee on behalf of your employer or a postgraduate student of an affiliated institution which is paying any applicable article publishing charge ("APC") for Open Access articles. Where the Submitting Author wishes to make the Work available on an Open Access basis (and intends to pay the relevant APC), the terms of reuse of such Open Access shall be governed by a Creative Commons licence – details of these licences and which [Creative Commons](#) licence will apply to this Work are set out in our licence referred to above.

Other than as permitted in any relevant BMJ Author's Self Archiving Policies, I confirm this Work has not been accepted for publication elsewhere, is not being considered for publication elsewhere and does not duplicate material already published. I confirm all authors consent to publication of this Work and authorise the granting of this licence.



1  
2  
3 **Title: Digital health interventions for the management of mental health in people with**  
4 **chronic diseases: a rapid review.**  
5

6 Maxime Sasseville, RN, PhD, Université du Québec à Chicoutimi, VITAM Research Center  
7 on Sustainable Health, maxime1\_sasseville@uqac.ca

8 Annie LeBlanc, PhD, Université Laval, VITAM Research Center on Sustainable Health,  
9 annie.leblanc@fmed.ulaval.ca

10 Mylène Boucher, MSc, VITAM Research Center on Sustainable Health,  
11 Mylene.Boucher.ciusscn@ssss.gouv.qc.ca

12 Michèle Dugas, MSc, VITAM Research Center on Sustainable Health,  
13 michele.dugas.1@ulaval.ca

14 Mbemba Gisèle, PhD, Université Laval, gisele-irene-claudine.mbemba.1@ulaval.ca

15 Jack Tchunte, M.A, VITAM Research Center on Sustainable Health,  
16 jack.tchunte.ciusscn@ssss.gouv.qc.ca

17 Maud-Christine Chouinard, RN, PhD, Université de Montréal,  
18 maud.christine.chouinard@umontreal.ca

19 Marianne Beaulieu, PhD, Université Laval, Marianne.Beaulieu@fsi.ulaval.ca

20 Nicolas Beaudet, PhD, Université de Sherbrooke, Omnimed, nbeaudet@omnimed.com

21 Becky Skidmore, MLS, Independent Information Specialist, bskidmore@rogers.com

22 Pascale Cholette, MD, Centre Intégré Universitaire de Santé et de Services Sociaux de la  
23 Capitale Nationale, pascale.cholette@gmail.com

24 Christine Aspiros, B.A.A, Patient-Partner, christine.aspiros1@gmail.com

25 Alain Larouche, MD, Groupe Concerto, alarouche@groupeconcerto.com

26 Guylaine Chabot, Groupe Concerto, gchabot@groupeconcerto.com

27 Marie-Pierre Gagnon, PhD, Université Laval, VITAM Research Center on Sustainable  
28 Health, Marie-Pierre.Gagnon@fsi.ulaval.ca

29  
30  
31  
32  
33  
34 **Corresponding author contact e-mail:**

35 maxime1\_sasseville@uqac.ca

36 **Funding statement:** This review was funded by the Canadian Institute for Health Research in  
37 the Operating Grant: Knowledge Synthesis: COVID-19 in Mental Health & Substance Use.  
38 Grant number: 202005CMS-442711-CMV-CFBA-111141

39 **Declaration of competing interests:** The authors have no conflict of interests to declare.  
40

41  
42 **Word count: 2492 words (2500 words MAX)**  
43

44 **Keywords:**

- 45 • Rapid review
- 46 • Chronic Diseases
- 47 • Digital health interventions
- 48 • Mental health
- 49
- 50
- 51
- 52
- 53
- 54
- 55
- 56
- 57
- 58
- 59
- 60



## ABSTRACT

**Objective:** Determine the effectiveness of digital mental health interventions for individuals with a concomitant chronic disease.

**Design:** We conducted a rapid review of systematic reviews. Two reviewers independently conducted study selection, and risk of bias evaluation. A standardized extraction form was used. Data is reported narratively.

**Interventions:** We included systematic reviews of digital health interventions aiming to prevent, detect or manage mental health problems in individuals with a pre-existing chronic disease, including chronic mental health illnesses, published in 2010 or after.

**Main outcome measure:** Reports on mental health outcomes (e.g.: anxiety symptoms, depression symptoms).

**Results:** We included 35 reviews, totalling 702 primary studies with a total sample of 50 692 participants. We structured the results in four population clusters: 1) chronic diseases; 2) cancer; 3) mental health; and 4) children and youth. For populations presenting a chronic disease or cancer, health provider-directed digital interventions (e.g., web-based consultation, internet cognitive behavior therapy) are effective and safe. Further analyses are required in order to provide stronger recommendations regarding relevance for specific population (such as children and youth). Web-based interventions and e-mail were the mode of administration that had the most reports of improvement. Virtual reality, smart-phone applications and patient portal had limited reports of improvement.

**Conclusions:** Digital technologies could be used to prevent and manage mental health problems in people living with chronic conditions, with consideration for the age group and type of technology used.

### Strengths and limitation of this study

- We conducted a rapid review of systematic reviews published in the last 10 years, including a large body of evidence in four clusters of population.
- A panel of knowledge users were involved in each step of the review, from conceptualization to publication to ensure relevance in clinical context and policy making.
- Study selection and bias evaluation were completed by two independent reviewers and data extraction used a standardized form.
- We limited the search to the most relevant databases and the last 10 years.
- The overlapping of primary studies was not evaluated.

## INTRODUCTION

Chronic diseases are the main burden on healthcare systems in developed countries and account for almost 70% of deaths worldwide(1). An individual with a chronic condition is two to three times more likely to present a concomitant mental health problem than the general population (2). As the number of physical chronic conditions increase in a population, so do the mental health ones. The co-occurrence of chronic and mental health conditions leads to an increase in total healthcare costs and services utilization, as well as poorer quality of life and health outcomes for these individuals (3, 4).

The psychosocial consequences of the current COVID-19 pandemic are alarming and will persist long after the pandemic is over (5). In the current COVID-19 pandemic context, efforts have been invested to rapidly produce scientific evidence in mental health for adapting the clinical setting and supporting policy making (e.g., confinement measures). Adapting to telehealth, when in-person consultation is not recommended, requires efficient and relevant digital mental health interventions for the population with concomitant chronic diseases and mental health issues. While a large number of interventions using digital technologies have been evaluated for the management of depression or anxiety (6, 7), the relevance of these interventions for people living with chronic diseases remains to be defined.

This rapid review of systematic reviews aimed to determine effectiveness of digital mental health interventions aiming to prevent, detect or manage mental health problems in individuals with a pre-existing chronic condition.

## METHODS

We conducted a rapid review following the guidance from the Cochrane Rapid Reviews Methods Group (8). We report our results based on the Preferred Reporting Items for Systematic Reviews and Meta-Analyses (PRISMA) Statement (9). The protocol for this rapid review was registered in the National Collaborating Centre for Methods and Tools (NCCMT) COVID-19 Rapid Evidence Service (ID 75).

### Knowledge Users Engagement

We engaged a panel of knowledge users (patients, clinicians, decision makers), content experts, review methodologists, and researchers throughout the review process, from question development, literature search, data extraction and analysis, interpretation and writing of results, and dissemination of findings.

### Eligibility Criteria

We followed the PICO Framework in establishing eligibility criteria (10) (Table 1). We considered any review that included digital health interventions aiming to prevent, detect or manage mental health problems in individuals with a pre-existing chronic disease, including chronic mental health diseases, published in 2010 or after. There was no language restriction.

**Table 1. PICO Eligibility Criteria**

|                       |                                                                                                                                                                                                                                                                                                                                                                                       |
|-----------------------|---------------------------------------------------------------------------------------------------------------------------------------------------------------------------------------------------------------------------------------------------------------------------------------------------------------------------------------------------------------------------------------|
| <b>Population (P)</b> | Adults with any chronic disease (e.g., diabetes, ischemic heart diseases, cerebrovascular diseases, chronic obstructive pulmonary disease (COPD), asthma, hypertension, dyslipidemia, arthritis/rheumatoid arthritis, chronic pain, cancer, chronic renal disease, inflammatory bowel diseases, mood disorders, attention deficit disorders). We will rely in the authors' definition |
|-----------------------|---------------------------------------------------------------------------------------------------------------------------------------------------------------------------------------------------------------------------------------------------------------------------------------------------------------------------------------------------------------------------------------|

|                         |                                                                                                                                                                                                                                                                                                                                                |
|-------------------------|------------------------------------------------------------------------------------------------------------------------------------------------------------------------------------------------------------------------------------------------------------------------------------------------------------------------------------------------|
|                         | of chronic disease AND presenting, or at risk of presenting, a concomitant mental health problem (e.g., mood disorders, depression, anxiety, obsessive compulsive disorder, panic disorder, post-traumatic stress disorder).                                                                                                                   |
| <b>Intervention (I)</b> | Digital health technologies, including but not limited to: telemedicine/teleconsultation, patient portal, electronic health record, web-based/internet intervention, or smart phone applications.                                                                                                                                              |
| <b>Comparator (C)</b>   | No intervention, usual care, any other (digital or non-digital) intervention.                                                                                                                                                                                                                                                                  |
| <b>Outcomes (O)</b>     | Prevalence of mental health problems; scores of depression, anxiety or other mental health problem; quality of life; specific clinical indicators (e.g., HbA1c for diabetes); patient satisfaction; impact on care utilization (e.g., ED visits, hospitalization, outpatient consultations); costs (for the individual and the health system). |

### Literature Search

An experienced medical information specialist developed and tested the search strategies through an iterative process in consultation with the review team and knowledge users. Using the OVID platform, we searched Ovid MEDLINE®, including Epub Ahead of Print and In-Process & Other Non-Indexed Citations, Embase Classic+Embase, Cochrane Database of Systematic Reviews, Database of Abstracts of Reviews of Effects and the Health Technology Assessment Database. We also searched CINAHL (EBSCO) and Web of Science. All searches were performed on June 11, 2020. We used a combination of controlled vocabulary (e.g., “Chronic Disease”, “Mood Disorders”, “Internet”) and keywords (e.g., “cancer”, “anxiety”, “telehealth”), and adjusted vocabulary and syntax across the databases. We applied a systematic review filter to all searches except for the Cochrane databases, where it is not required. Specific details regarding the strategies appear in supplementary file 1.

### Study Selection, Data Extraction, and Synthesis

Six reviewers individually performed screening for titles, abstracts and then full text using a standardized form pilot-tested by all reviewers on 25 citations. All citations were reviewed by two reviewers independently at the first level of screening. We developed a standardized extraction form that included study characteristics (e.g., authors, country, design), intervention characteristics (e.g., type of digital intervention), and outcomes reported. A senior reviewer reviewed all full-text citations for inclusion. Single reviewers extracted data which were then confirmed by a senior reviewer. We resolved discrepancies through discussion. We report data using a narrative approach which includes tables of study characteristics, intervention characteristics, and mental health outcomes.

### Critical Appraisal

We used the AMSTAR 2 tool to critically appraise each included review (11). This revised version of the AMSTAR tool was developed for the evaluation of systematic reviews that include randomised or non-randomised studies of healthcare interventions. This tool has good inter-rater reliability, is widely used for healthcare research, and uses a four-level rating of overall confidence. A single reviewer rated the critical appraisal tool and all judgements were verified by a second author (11).

### Patient and Public involvement

1  
2  
3 A panel of knowledge users (patients and clinicians) was involved throughout the research  
4 process, from funding acquisition to publication. The panel will also be involved in  
5 subsequent dissemination activities.  
6  
7

## 8 9 **RESULTS**

### 10 **Characteristics of Included Reviews**

11 Our search strategy identified 2320 individual citation. Following screening of titles and  
12 abstracts, we excluded 2153 records. We excluded an additional 132 citations during full-text  
13 screening, resulting in a total of 35 citations included in our review (Figure 1)(12-46).Of  
14 these reviews, there were 17 systematic reviews, 17 systematic reviews with meta-analysis  
15 and one integrative review, totalizing 702 primary studies with a total sample of 50,692  
16 participants.  
17  
18

19 Most reviews described digital interventions performed in a specialized care setting (42%)  
20 and targeted an adult population (83%). They were looking at interventions to manage and  
21 treat a mental health problem (60%), testing web-based and internet interventions (32%) by  
22 comparing them to usual care (48%), for people affected with cancer or various chronic  
23 diseases (77%). We present the complete description of included reviews in Table 2. A  
24 presentation of the reviews by technology used in available in additional table 1.  
25  
26

27 The overall confidence ratings of the AMSTAR 2 tool were mostly high or moderate (31/35)  
28 with a limited number of low ratings (4/35) and no critically low rating (Table 3). A small  
29 percentage of the AMSTAR 2 items were not reported in the included reviews with the  
30 exception of the source of funding of primary studies in the included reviews (0%) (Figure 2).  
31  
32

33 We structured our synthesis according to four population clusters: 1) chronic diseases; 2)  
34 cancer; 3) mental health; and 4) children and youth. The mental health outcomes found in the  
35 included reviews were mainly depression and anxiety symptoms, assessed through  
36 heterogeneous outcomes measures. The results are further presented by type of reporting  
37 (quantitative or narrative).  
38  
39  
40  
41  
42  
43  
44  
45  
46  
47  
48  
49  
50  
51  
52  
53  
54  
55  
56  
57  
58  
59  
60

Table 2. Description of included reviews

| Author, Year                   | Review Design | n of primary studies, Design | n of patients (pooled) | Type of chronic diseases                      | Type of Digital technology interventions                                   | Depression outcomes                                                                                                                                                                                                                                               | Anxiety outcomes                         | Other mental health outcomes                                                                                                                                                                           |
|--------------------------------|---------------|------------------------------|------------------------|-----------------------------------------------|----------------------------------------------------------------------------|-------------------------------------------------------------------------------------------------------------------------------------------------------------------------------------------------------------------------------------------------------------------|------------------------------------------|--------------------------------------------------------------------------------------------------------------------------------------------------------------------------------------------------------|
| <b>Chronic Disease Cluster</b> |               |                              |                        |                                               |                                                                            |                                                                                                                                                                                                                                                                   |                                          |                                                                                                                                                                                                        |
| Beatty 2013 (14)               | SR            | 24<br>Experimental           | NR                     | Chronic physical diseases                     | Web-based/internet intervention, App, Email, Telemedicine/teleconsultation | Improvement between groups comparison. Improvement within group (moderate effect size). Improvement sustained at 12 months follow-up. iCBT with and without therapist showed no differences between groups. iCBT showed no difference when compared to group-CBT. | Improvement at 3 months and at 12 months | NR                                                                                                                                                                                                     |
| Charova 2015 (16)              | SR with MA    | 11<br>Experimental           | 1348                   | Any chronic disease with comorbid MH disorder | Web-based/internet intervention                                            | DW 0.31; CI 0.17 to 0.45; p<0.01                                                                                                                                                                                                                                  | NR                                       | NR                                                                                                                                                                                                     |
| Clari, 2020 (18)               | SR            | 1<br>Mixed                   | 84                     | COPD                                          | Telemedicine/teleconsultation                                              | No difference between groups.                                                                                                                                                                                                                                     | No difference between groups.            | Qualitative data: Promoted active acceptance of their disease /Improved the awareness of their physical sensations /Helped identify signs and symptoms /Improvement of the management of acute events. |

|    |             |          |              |      |              |                      |                           |                          |                        |
|----|-------------|----------|--------------|------|--------------|----------------------|---------------------------|--------------------------|------------------------|
| 1  |             |          |              |      |              |                      |                           |                          |                        |
| 2  |             |          |              |      |              |                      |                           |                          |                        |
| 3  | Eccleston,  | SR with  | 14           | 2012 | Chronic pain | Web-based/internet   | SMD = -0.26 [95% CI       | SMD = -0.48 [95% CI      | NR                     |
| 4  | 2019 (19)   | MA       | Experimental |      |              | intervention, App,   | -0.87 to 0.36]            | -1.22to 0.27]            |                        |
| 5  |             |          |              |      |              | Telemedicine/teleco  |                           |                          |                        |
| 6  |             |          |              |      |              | nsultation           |                           |                          |                        |
| 7  |             |          |              |      |              |                      |                           |                          |                        |
| 8  | Hedman,     | SR with  | 108          | NR   | Any          | Web-based/internet   | MD = 0.94 [95% CI:        | MD = 1.12 [95% CI:       | NR                     |
| 9  | 2012 (23)   | MA       | Experimental |      |              | intervention         | 0.77-1.11] Large effect   | 0.61-1.62],              |                        |
| 10 |             |          |              |      |              |                      | size, within groups       | Large effect size.       |                        |
| 11 | McCombie    | SR       | 29           | 3935 | Chronic      | Web-based/internet   | Improvement of            | Improvement (2/7)        | NR                     |
| 12 | , 2015 (31) |          | Mixed        |      | physical     | intervention         | depression scores (4/8)   |                          |                        |
| 13 |             |          |              |      | diseases     |                      |                           |                          |                        |
| 14 |             |          |              |      |              |                      |                           |                          |                        |
| 15 | Mehta,      | SR with  | 25           | 3450 | Any          | Web-based/internet   | Improved depression       | Improved anxiety,        | NR                     |
| 16 | 2018 (33)   | MA       | Experimental |      |              | intervention, Email  | symptoms with small to    | similar effect size than |                        |
| 17 |             |          |              |      |              |                      | medium effect size.       | usual care.              |                        |
| 18 |             |          |              |      |              |                      | Therapist guided ICBT     |                          |                        |
| 19 |             |          |              |      |              |                      | showed larger effect size |                          |                        |
| 20 |             |          |              |      |              |                      | than self-guided ICBT.    |                          |                        |
| 21 | Mikolasek,  | SR with  | 17           | 1855 | Chronic      | Web-based/internet   | Active control: 2/7       | Active control: 2/7      | NR                     |
| 22 | 2018 (34)   | Meta-    | Experimental |      | physical     | intervention         | showed superior           | showed superior          |                        |
| 23 |             | Analysis |              |      | diseases     |                      | effectiveness; 4/7 equal  | effectiveness; 4/7 equal |                        |
| 24 |             |          |              |      |              |                      | effectiveness; 1/7        | effectiveness; 1/7       |                        |
| 25 |             |          |              |      |              |                      | inferior effectiveness.   | inferior effectiveness.  |                        |
| 26 |             |          |              |      |              |                      | Usual care: 1/4 showed    | Usual care: 1/4 showed   |                        |
| 27 |             |          |              |      |              |                      | superior effectiveness;   | superior effectiveness;  |                        |
| 28 |             |          |              |      |              |                      | 3/4 showed equal          | 3/4 showed equal         |                        |
| 29 |             |          |              |      |              |                      | effectiveness.            | effectiveness.           |                        |
| 30 | Palacios,   | SR       | 7            | 1321 | Chronic      | Web-based/internet   | PHQ-9 score mean from     | NR                       | NR                     |
| 31 | 2017 (36)   |          | Experimental |      | physical     | intervention, App,   | 12 (post) to 8.4 (follow- |                          |                        |
| 32 |             |          |              |      | diseases     | Email, Text          | up)                       |                          |                        |
| 33 |             |          |              |      |              | message              |                           |                          |                        |
| 34 | Paul, 2013  | SR       | 36           | NR   | Any chronic  | Web-based/internet   | Improved depression in    | Improved anxiety in      | Mixed results in       |
| 35 | (37)        |          | Experimental |      | disease with | intervention, Online | comparison between        | comparison with          | psychosocial outcomes. |
| 36 |             |          |              |      | comorbid     | chat                 | groups.                   | control                  |                        |
| 37 |             |          |              |      | MH disorder  |                      |                           |                          |                        |
| 38 |             |          |              |      |              |                      |                           |                          |                        |
| 39 |             |          |              |      |              |                      |                           |                          |                        |
| 40 |             |          |              |      |              |                      |                           |                          |                        |
| 41 |             |          |              |      |              |                      |                           |                          |                        |
| 42 |             |          |              |      |              |                      |                           |                          |                        |
| 43 |             |          |              |      |              |                      |                           |                          |                        |
| 44 |             |          |              |      |              |                      |                           |                          |                        |
| 45 |             |          |              |      |              |                      |                           |                          |                        |
| 46 |             |          |              |      |              |                      |                           |                          |                        |

1  
2  
3  
4  
5  
6  
7  
8  
9  
10  
11  
12  
13  
14  
15  
16  
17  
18  
19  
20  
21  
22  
23  
24  
25  
26  
27  
28  
29  
30  
31  
32  
33  
34  
35  
36  
37  
38  
39  
40  
41  
42  
43  
44  
45  
46

|                       |            |                    |      |                           |                                                                                                    |                                                                                                                                                                                                                                                                      |                                                     |                                                    |
|-----------------------|------------|--------------------|------|---------------------------|----------------------------------------------------------------------------------------------------|----------------------------------------------------------------------------------------------------------------------------------------------------------------------------------------------------------------------------------------------------------------------|-----------------------------------------------------|----------------------------------------------------|
| Toivonen, 2017(40)    | SR         | 16<br>Experimental | NR   | Any                       | Web-based/internet intervention, Email, Online chat                                                | Improved depression symptoms with a small effect size.                                                                                                                                                                                                               | Improved anxiety symptoms with a small effect size. | NR                                                 |
| van Beugen, 2014 (42) | SR with MA | 23<br>Experimental | 2299 | Any                       | Web-based/internet intervention, App, Email, Text message, Online chat                             | SMD = 0.21 [95% CI: 0.08-0.34]                                                                                                                                                                                                                                       | SMD = 0.17 [95% CI:0.01-0.32]                       | General distress: SMD = 0.21 [CI:0.00-0.41]        |
| Vugts, 2018 (43)      | SR with MA | 46<br>Experimental | NR   | Chronic physical diseases | Web-based/internet intervention, Email, Text message, Online chat, Telemedicine/teleconsultation   | SMD =-0.18 [95%CI -0.28, -0.07]<br>SMD =-.18 [95% CI:-.28, -.07] Passive control (post)<br>SMD =-.29 [95% CI:-.48, -.10] Passive control (follow-up)<br>SMD =.14 [95% CI:-.37, .09] Active control (post)<br>SMD =.31 [95% CI: -.78, .16] Active control (follow-up) | NR                                                  | NR                                                 |
| <b>Cancer Cluster</b> |            |                    |      |                           |                                                                                                    |                                                                                                                                                                                                                                                                      |                                                     |                                                    |
| Agboola 2015 (12)     | SR         | 20<br>Experimental | 3789 | Cancer                    | Web-based/internet, App, Virtual reality, Text message, Online chat, Telemedicine/teleconsultation | heterogeneous studies no pooling possible                                                                                                                                                                                                                            | Improvement in anxiety symptoms (3/8)               | NR                                                 |
| Bartolo 2019 (13)     | SR         | 8<br>Experimental  | 1016 | Cancer                    | Web-based/internet, Patient portal, App, Email,                                                    | Improvement in depression symptoms 3 weeks post interventions. small effect size                                                                                                                                                                                     | NR                                                  | Improvement in global distress, small effect size. |



|  |                          |            |                    |      |        |                                                                                                  |                                                                                                   |                                        |                                                                           |
|--|--------------------------|------------|--------------------|------|--------|--------------------------------------------------------------------------------------------------|---------------------------------------------------------------------------------------------------|----------------------------------------|---------------------------------------------------------------------------|
|  |                          |            |                    |      |        | Telemedicine/teleconsultation                                                                    | The telephone intervention yielded medium effect size improvement.                                |                                        |                                                                           |
|  | Bouma 2015 (15)          | SR         | 16<br>Experimental | 2620 | Cancer | Web-based/internet intervention                                                                  | Improvement on depression symptoms (1/7) (between groups)                                         | Improvement in anxiety symptoms (2/10) | Improvement on quality of life (3/11)                                     |
|  | Chen, 2018 (17)          | SR with MA | 20<br>Experimental | 2190 | Cancer | Web-based/internet intervention, Telemedicine/teleconsultation                                   | SMD = 1.29, [95% CI 2.28 to 0.30]                                                                 | SMD = 0.09, [95% CI 0.22 to 0.04]      | Distress: SMD = ¼ 0.25, [95% CI 0.40 to 0.10, p < 0.001]                  |
|  | Forbes, 2019 (21)        | SR         | 16<br>Experimental | 2446 | Cancer | Web-based/internet intervention, Email, Online chat                                              | Improvement of depression score within group.                                                     | NR                                     | Psychological distress: effect size larger with ICBT compared with forum. |
|  | Fridriksdotir, 2017 (22) | SR         | 20<br>Experimental | NR   | Cancer | Web-based/internet intervention, Email                                                           | Better improvement with CBT compared to online forum<br>Improvement in depression symptoms (2/10) | Improvement in anxiety symptoms (4/10) | Improvement on psychological distress. (3/8)                              |
|  | Kim, 2015 (24)           | SR with MA | 37<br>Experimental | NR   | Cancer | Web-based/internet intervention, Email, Text message, Online chat, Telemedicine/teleconsultation | Hedges'g = -0.169 [-0.282 - -0.055]                                                               | Hedges'g = -0.293 [-0.465 - -0.122]    | QOL: Hedges'g = -0.221 [-0.359 - -0.084]                                  |
|  | Kim, 2017 (25)           | SR with MA | 19<br>Mixed        | 2381 | Cancer | Web-based/internet intervention, Telemedicine/teleconsultation                                   | d = -0.07, p = 0.284 (post)<br>d = -0.2, p = 0.477 (follow-up)                                    | d = -0.2, p = 0.132                    | NR                                                                        |
|  | Lin, 2020 (27)           | Mixed      | 16<br>Mixed        | 1053 | Cancer | Web-based/internet intervention, App,                                                            | Improvement of depression scores (5/11)                                                           | Improvement of anxiety scores (5/11)   | NR                                                                        |



|    |                                   |            |                    |      |              |                                                                     |                                                               |                                                                          |                                                        |  |
|----|-----------------------------------|------------|--------------------|------|--------------|---------------------------------------------------------------------|---------------------------------------------------------------|--------------------------------------------------------------------------|--------------------------------------------------------|--|
| 1  |                                   |            |                    |      |              | Email, Text message                                                 |                                                               |                                                                          |                                                        |  |
| 2  |                                   |            |                    |      |              |                                                                     |                                                               |                                                                          |                                                        |  |
| 3  |                                   |            |                    |      |              |                                                                     |                                                               |                                                                          |                                                        |  |
| 4  |                                   |            |                    |      |              |                                                                     |                                                               |                                                                          |                                                        |  |
| 5  |                                   |            |                    |      |              |                                                                     |                                                               |                                                                          |                                                        |  |
| 6  | McCaughan, 2017 (30)              | SR         | 6<br>Experimental  | 492  | Cancer       | Web-based/internet intervention, Patient portal, Email, Online chat | SMD = -0.37, [95% CI -0.75 to 0.00]                           | Mean 0.4 lower at end of intervention [95% CI 6.42 lower to 5.62 higher] | NR                                                     |  |
| 7  |                                   |            |                    |      |              |                                                                     |                                                               |                                                                          |                                                        |  |
| 8  |                                   |            |                    |      |              |                                                                     |                                                               |                                                                          |                                                        |  |
| 9  |                                   |            |                    |      |              |                                                                     |                                                               |                                                                          |                                                        |  |
| 10 |                                   |            |                    |      |              |                                                                     |                                                               |                                                                          |                                                        |  |
| 11 |                                   |            |                    |      |              |                                                                     |                                                               | MD = -0.40, [95% CI -6.42 to 5.62]; low-quality evidence between groups  |                                                        |  |
| 12 |                                   |            |                    |      |              |                                                                     |                                                               | Improvement of anxiety score (between group) (1/5)                       | NR                                                     |  |
| 13 |                                   |            |                    |      |              |                                                                     |                                                               |                                                                          |                                                        |  |
| 14 |                                   |            |                    |      |              |                                                                     |                                                               |                                                                          |                                                        |  |
| 15 | Qan'ir, 2019 (38)                 | SR with MA | 10<br>Experimental | 1124 | Cancer       | Web-based/internet intervention, App, Online chat                   | Improvement of depression score (between group) (2/7)         | Improvement of anxiety score (within group) (1/5)                        | NR                                                     |  |
| 16 |                                   |            |                    |      |              |                                                                     |                                                               |                                                                          |                                                        |  |
| 17 |                                   |            |                    |      |              |                                                                     |                                                               |                                                                          |                                                        |  |
| 18 |                                   |            |                    |      |              |                                                                     |                                                               |                                                                          |                                                        |  |
| 19 |                                   |            |                    |      |              |                                                                     |                                                               |                                                                          |                                                        |  |
| 20 |                                   |            |                    |      |              |                                                                     |                                                               |                                                                          |                                                        |  |
| 21 | Ugalde, 2015 (41)                 | SR         | 4<br>Experimental  | NR   | Cancer       | Web-based/internet intervention                                     | NR                                                            | NR                                                                       | **Improved self-efficacy for regulating negative mood. |  |
| 22 |                                   |            |                    |      |              |                                                                     |                                                               |                                                                          |                                                        |  |
| 23 |                                   |            |                    |      |              |                                                                     |                                                               |                                                                          |                                                        |  |
| 24 |                                   |            |                    |      |              |                                                                     |                                                               |                                                                          |                                                        |  |
| 25 | Wang, 2020 (44)                   | SR with MA | 7<br>Experimental  | 1220 | Cancer       | Web-based/internet intervention, App, Email                         | SMD = -0.58, 95% CI (-1.12, -0.03), p = 0.04 (between groups) | SMD = -1.03 [95% CI -2.63, 0.57], (between groups)                       | NR                                                     |  |
| 26 |                                   |            |                    |      |              |                                                                     |                                                               |                                                                          |                                                        |  |
| 27 |                                   |            |                    |      |              |                                                                     |                                                               |                                                                          |                                                        |  |
| 28 | Zeng, 2019 (46)                   | SR with MA | 6<br>Mixed         | NR   | Cancer       | Virtual reality                                                     | WMD = -1.11 [Z scores = 1.05, P = .29]                        | SMD = -3.03 [95% CI = -6.20 to 0.15]                                     | NR                                                     |  |
| 29 |                                   |            |                    |      |              |                                                                     |                                                               |                                                                          |                                                        |  |
| 30 |                                   |            |                    |      |              |                                                                     |                                                               |                                                                          |                                                        |  |
| 31 | <b>Youth and Children Cluster</b> |            |                    |      |              |                                                                     |                                                               |                                                                          |                                                        |  |
| 32 |                                   |            |                    |      |              |                                                                     |                                                               |                                                                          |                                                        |  |
| 33 | Fisher, 2019 (20)                 | SR with MA | 10<br>Mixed        | 697  | Chronic pain | Web-based/internet intervention, App                                | SMD 0.04, [95% CI -0.18 to 0.26]                              | SMD 0.53, [95% CI -0.63 to 1.68]                                         | NR                                                     |  |
| 34 |                                   |            |                    |      |              |                                                                     |                                                               |                                                                          |                                                        |  |
| 35 | Lopez-Rodriguez, 2020 (28)        | SR         | 8<br>Mixed         | 286  | Cancer       | App, Virtual reality                                                | Improved depression (3/3)                                     | Improved anxiety (2/3)                                                   | NR                                                     |  |
| 36 |                                   |            |                    |      |              |                                                                     |                                                               |                                                                          |                                                        |  |
| 37 |                                   |            |                    |      |              |                                                                     |                                                               |                                                                          |                                                        |  |
| 38 |                                   |            |                    |      |              |                                                                     |                                                               |                                                                          |                                                        |  |
| 39 |                                   |            |                    |      |              |                                                                     |                                                               |                                                                          |                                                        |  |
| 40 |                                   |            |                    |      |              |                                                                     |                                                               |                                                                          |                                                        |  |
| 41 |                                   |            |                    |      |              |                                                                     |                                                               |                                                                          |                                                        |  |
| 42 |                                   |            |                    |      |              |                                                                     |                                                               |                                                                          |                                                        |  |
| 43 |                                   |            |                    |      |              |                                                                     |                                                               |                                                                          |                                                        |  |
| 44 |                                   |            |                    |      |              |                                                                     |                                                               |                                                                          |                                                        |  |
| 45 |                                   |            |                    |      |              |                                                                     |                                                               |                                                                          |                                                        |  |
| 46 |                                   |            |                    |      |              |                                                                     |                                                               |                                                                          |                                                        |  |

|                              |            |                    |      |                           |                                                                                     |                                                                                                                                                      |                                                                                                                              |                                                                                                                            |  |
|------------------------------|------------|--------------------|------|---------------------------|-------------------------------------------------------------------------------------|------------------------------------------------------------------------------------------------------------------------------------------------------|------------------------------------------------------------------------------------------------------------------------------|----------------------------------------------------------------------------------------------------------------------------|--|
| McGar, 2019 (32)             | SR         | 22<br>Experimental | 1764 | Chronic physical diseases | Web-based/internet intervention                                                     | Improved depression symptoms (3/7)                                                                                                                   | Improved anxiety (4/5) (post)                                                                                                | Improved PTSD symptoms (2/3) (post)                                                                                        |  |
| Tang, 2018 (39)              | SR with MA | 4<br>Experimental  | 404  | Chronic pain              | Web-based/internet intervention                                                     | MD = 0.23, [95% CI: 0.03–0.43] (within group)<br>MD = 0.02, [95% CI: 0.19–0.22] (between group)<br>SMD = 0.02 [CI: 0.19, 0.22, p = 0.86] (follow-up) | SMD = 3.24, [95% CI: 1.88–4.61], (within group)<br>SMD = 0.41, [95% CI: 1.79–0.98] (between group)                           | NR                                                                                                                         |  |
| <b>Mental Health Cluster</b> |            |                    |      |                           |                                                                                     |                                                                                                                                                      |                                                                                                                              |                                                                                                                            |  |
| Lewis, 2018 (26)             | SR with MA | 10<br>Experimental | 720  | PTSD                      | Web-based/internet intervention                                                     | SMD = -0.61 [95% CI – 1.17 to –0.05] (between groups/post)<br>MD = – 8.95, 95% CI – 15.57 to –2.33] (between groups/follow-up)                       | SMD = –0.67 [95% CI –0.98 to –0.36] (between groups/post)<br>MD = –12.59 [95% CI –20.74 to –4.44] (between groups/follow-up) | PTSD<br>SMD = –0.60 [95% CI –0.97 to –0.24] (between groups/post)<br>RR = 0.53 [95% CI 0.28 to 1.00] (between groups/post) |  |
| MayoWilson, 2013 (29)        | SR with MA | 43<br>Experimental | 8403 | Anxiety                   | Web-based/internet intervention, Email, Text message, Telemedicine/teleconsultation | NR                                                                                                                                                   | SMD = 0.79, [95% CI 0.62 to 0.96] (internet-delivered)                                                                       | NR                                                                                                                         |  |
| Olthuis, 2016 (35)           | SR with MA | 38<br>Experimental | 3214 | Anxiety                   | Web-based/internet intervention, App, Email, Online chat                            | NR                                                                                                                                                   | *RR = 3.75 [95% CI 2.51 to 5.60] (generalized anxiety)<br>SMD = -1.06 [95% CI -1.29 to -0.8] (disorder specific anxiety)     | NR                                                                                                                         |  |

1  
2  
3  
4  
5  
6  
7  
8  
9  
10  
11  
12  
13  
14  
15  
16  
17  
18  
19  
20  
21  
22  
23  
24  
25  
26  
27  
28  
29  
30  
31  
32  
33  
34  
35  
36  
37  
38  
39  
40  
41  
42  
43  
44  
45  
46

|                          |    |                   |     |      |     |    |    |                                                                    |
|--------------------------|----|-------------------|-----|------|-----|----|----|--------------------------------------------------------------------|
| Wickersham, 2019<br>(45) | SR | 5<br>Experimental | 653 | PTSD | App | NR | NR | No improvement in PTSD between groups when compared to usual care. |
|--------------------------|----|-------------------|-----|------|-----|----|----|--------------------------------------------------------------------|

NOTE: SR: Systematic review; MA: Meta-analysis; NR: Not reported; MH: Mental health; PTSD: Post-Traumatic Stress Disorder; COPD: Chronic Obstructive Pulmonary Disease

**Table 3. Critical appraisal of the included reviews**

|                      | 1. Question and Inclusion | 2. Protocol | 3. Study Design | 4. Comprehensive Search | 5. Study Selection | 6. Data Extraction | 7. Excluded Studies Justify | 8. Included Studies Details | 9. Risk of Bias (RoB) | 10. Sources of Funding | 11. Statistical Methods | 12. Meta-analysis RoB | 13. Individual Studies RoB | 14. Heterogeneity Explanation | 15. Publication Bias | 16. Conflict of Interest | Overall Confidence Rating |
|----------------------|---------------------------|-------------|-----------------|-------------------------|--------------------|--------------------|-----------------------------|-----------------------------|-----------------------|------------------------|-------------------------|-----------------------|----------------------------|-------------------------------|----------------------|--------------------------|---------------------------|
| Agboola 2015         | N                         | PY          | Y               | PY                      | Y                  | Y                  | Y                           | PY                          | Y                     | N                      | N/A                     | N/A                   | Y                          | N                             | N/A                  | Y                        | Low                       |
| Bartolo 2017         | Y                         | Y           | Y               | Y                       | Y                  | Y                  | Y                           | Y                           | PY                    | N                      | N/A                     | N/A                   | Y                          | Y                             | N/A                  | Y                        | Moderate                  |
| Beatty 2012          | Y                         | PY          | Y               | Y                       | Y                  | Y                  | Y                           | Y                           | Y                     | N                      | N/A                     | N/A                   | Y                          | Y                             | N/A                  | N                        | Moderate                  |
| Bouma 2019           | Y                         | PY          | Y               | Y                       | Y                  | Y                  | Y                           | Y                           | Y                     | N                      | N/A                     | N/A                   | Y                          | Y                             | N/A                  | Y                        | Moderate                  |
| Charova 2015         | Y                         | Y           | Y               | Y                       | Y                  | Y                  | Y                           | Y                           | PY                    | N                      | Y                       | Y                     | Y                          | Y                             | Y                    | Y                        | Moderate                  |
| Chen 2018            | Y                         | PY          | Y               | Y                       | Y                  | Y                  | Y                           | Y                           | PY                    | N                      | Y                       | Y                     | Y                          | Y                             | Y                    | Y                        | Moderate                  |
| Clari 2020           | Y                         | Y           | Y               | Y                       | Y                  | Y                  | Y                           | Y                           | Y                     | N                      | N/A                     | N/A                   | Y                          | Y                             | N/A                  | Y                        | High                      |
| Eccleston 2019       | Y                         | Y           | Y               | Y                       | Y                  | Y                  | Y                           | Y                           | Y                     | N                      | Y                       | Y                     | Y                          | Y                             | Y                    | Y                        | High                      |
| Fisher 2019          | Y                         | Y           | Y               | Y                       | Y                  | Y                  | Y                           | Y                           | Y                     | N                      | Y                       | Y                     | Y                          | Y                             | Y                    | Y                        | High                      |
| Forbes 2019          | Y                         | Y           | Y               | Y                       | Y                  | Y                  | Y                           | Y                           | Y                     | N                      | N/A                     | N/A                   | Y                          | Y                             | N/A                  | Y                        | High                      |
| Fridriksdottir 2017  | Y                         | PY          | Y               | Y                       | Y                  | Y                  | Y                           | Y                           | Y                     | N                      | N/A                     | N/A                   | Y                          | Y                             | N/A                  | Y                        | Moderate                  |
| Hedman 2012          | Y                         | N           | Y               | Y                       | Y                  | Y                  | Y                           | Y                           | PY                    | N                      | Y                       | Y                     | Y                          | Y                             | Y                    | Y                        | Low                       |
| Kim 2015             | Y                         | PY          | Y               | Y                       | Y                  | Y                  | Y                           | Y                           | Y                     | N                      | Y                       | Y                     | Y                          | Y                             | Y                    | Y                        | Moderate                  |
| Kim 2017             | Y                         | PY          | Y               | Y                       | Y                  | Y                  | Y                           | Y                           | Y                     | N                      | Y                       | Y                     | Y                          | Y                             | Y                    | N                        | Moderate                  |
| Lewis 2018           | Y                         | Y           | Y               | Y                       | Y                  | Y                  | Y                           | Y                           | Y                     | N                      | Y                       | Y                     | Y                          | Y                             | Y                    | Y                        | High                      |
| Lin 2020             | Y                         | PY          | Y               | Y                       | Y                  | Y                  | Y                           | Y                           | Y                     | N                      | N/A                     | N/A                   | Y                          | Y                             | N/A                  | Y                        | Moderate                  |
| Lopez-Rodriguez 2020 | Y                         | Y           | Y               | Y                       | Y                  | Y                  | Y                           | Y                           | Y                     | N                      | N/A                     | N/A                   | Y                          | Y                             | Y                    | Y                        | High                      |

|                  |   |    |   |    |     |     |   |   |    |   |     |     |   |   |     |   |          |
|------------------|---|----|---|----|-----|-----|---|---|----|---|-----|-----|---|---|-----|---|----------|
| Mayo-Wilson 2013 | Y | Y  | Y | Y  | Y   | Y   | Y | Y | Y  | N | Y   | Y   | Y | Y | Y   | Y | High     |
| McCaughan 2017   | Y | Y  | Y | Y  | Y   | Y   | Y | Y | Y  | N | Y   | Y   | Y | Y | Y   | Y | High     |
| McCombie 2015    | Y | N  | Y | Y  | Y   | Y   | Y | Y | Y  | N | N/A | N/A | Y | Y | N/A | Y | Low      |
| McGar 2019       | Y | PY | Y | Y  | Y   | Y   | Y | Y | PY | N | N/A | N/A | Y | Y | N/A | Y | Moderate |
| Mehta 2019       | Y | Y  | Y | Y  | Y   | Y   | Y | Y | Y  | N | Y   | Y   | Y | Y | Y   | Y | Moderate |
| Mikolasek 2018   | Y | PY | Y | Y  | Y   | Y   | Y | Y | Y  | N | N/A | N/A | Y | Y | N/A | Y | Moderate |
| Olthuis 2016     | Y | Y  | Y | Y  | Y   | Y   | Y | Y | Y  | N | Y   | Y   | Y | Y | Y   | Y | Moderate |
| Palacios 2017    | Y | PY | Y | Y  | Y   | Y   | Y | Y | Y  | N | N/A | N/A | Y | Y | N/A | Y | Moderate |
| Paul 2013        | Y | PY | Y | PY | N/A | N/A | Y | Y | PY | N | N/A | N/A | Y | Y | N/A | Y | Moderate |
| Qan'ir 2019      | Y | PY | Y | Y  | Y   | Y   | Y | Y | Y  | N | N/A | N/A | Y | Y | N/A | Y | Moderate |
| Tang 2018        | Y | Y  | Y | Y  | Y   | Y   | Y | Y | Y  | N | Y   | Y   | Y | Y | Y   | Y | High     |
| Toivonen 2017    | Y | N  | Y | Y  | Y   | Y   | Y | Y | Y  | N | N/A | N/A | Y | Y | N/A | Y | Low      |
| Ugalde 2017      | Y | Y  | Y | Y  | Y   | Y   | Y | Y | Y  | N | N/A | N/A | Y | Y | N/A | Y | High     |
| van Beugen 2014  | Y | PY | Y | Y  | Y   | Y   | Y | Y | Y  | N | Y   | Y   | Y | Y | Y   | Y | Moderate |
| Vaugts 2018      | Y | Y  | Y | Y  | Y   | Y   | Y | Y | Y  | N | Y   | Y   | Y | Y | Y   | Y | High     |
| Wang 2020        | Y | Y  | Y | Y  | Y   | Y   | Y | Y | Y  | N | Y   | Y   | Y | Y | Y   | Y | High     |
| Wickersham 2019  | Y | Y  | Y | Y  | Y   | Y   | Y | Y | Y  | N | N/A | N/A | Y | Y | N/A | Y | High     |
| Zeng 2019        | Y | PY | Y | Y  | Y   | Y   | Y | Y | Y  | N | Y   | Y   | Y | Y | Y   | Y | Moderate |

Abbreviations: Y=Yes, N=No, PY=Partial Yes, NA=Not Applicable, H=High, M=Moderate, L=Low, RoB=Risk of Bias.

**Table 4. Studies reporting improvements classified by the type of digital technology used**

|                                | Chronic diseases cluster                                        |                                       |       | Cancer cluster              |                        |                             | Children and youth cluster |                     |       | Mental health cluster |                     |       |
|--------------------------------|-----------------------------------------------------------------|---------------------------------------|-------|-----------------------------|------------------------|-----------------------------|----------------------------|---------------------|-------|-----------------------|---------------------|-------|
|                                | Depression                                                      | Anxiety                               | Other | Depression                  | Anxiety                | Other                       | Depression                 | Anxiety             | Other | Depression            | Anxiety             | Other |
| <b>Web-based interventions</b> | (23) (42) (43)<br>(16) (36) (31)<br>(14) (40) (33)<br>(34) (37) | (23) (31) (14)<br>(40) (33) (34) (37) | (37)  | (17) (44) (24)<br>(21) (13) | (17) (30) (44)<br>(24) | (17) (24) (21)<br>(41) (13) | (20) (39)                  | (20) (39) (32) (32) | (32)  | (26)                  | (29) (35) (26) (26) | (26)  |
| <b>Patient portal</b>          |                                                                 |                                       |       |                             | (30)                   |                             |                            |                     |       |                       |                     |       |
| <b>Smart Phone application</b> | (42) (36) (14) (14)                                             |                                       |       | (44)                        | (44)                   |                             | (20) (28)                  | (20) (28)           |       |                       | (35)                |       |
| <b>Virtual reality</b>         |                                                                 |                                       |       |                             |                        |                             | (28)                       | (28)                |       |                       |                     |       |
| <b>Email</b>                   | (42) (43) (36)<br>(14) (40) (33)                                | (14) (40) (33)                        |       | (44) (24) (21)<br>(13)      | (30) (44) (24)         | (24) (21) (13)              |                            |                     |       |                       | (29) (35)           |       |

1  
2  
3  
4  
5  
6  
7  
8  
9  
10  
11  
12  
13  
14  
15  
16  
17  
18  
19  
20  
21  
22  
23  
24  
25  
26  
27  
28  
29  
30  
31  
32  
33  
34  
35  
36  
37  
38  
39  
40  
41  
42  
43  
44  
45  
46

---

|                                           |                        |           |      |                |           |                |      |
|-------------------------------------------|------------------------|-----------|------|----------------|-----------|----------------|------|
| <b>Text message</b>                       | (42) (43) (36)         |           | (24) | (24)           | (24)      |                | (29) |
| <b>Online chat</b>                        | (42) (43) (40)<br>(37) | (40) (37) | (37) | (24) (21)      | (30) (24) | (24) (21)      | (35) |
| <b>Telemedicine/<br/>Teleconsultation</b> | (42) (14)              | (14)      |      | (17) (24) (13) | (17) (24) | (17) (24) (13) | (29) |

---

For peer review only

### **Chronic Diseases Cluster**

We identified 13 reviews referring to people with various chronic diseases (Table 2). Six of the 13 reviews reported their results using pooled difference of score mean (16, 19, 23, 36, 42, 43). The majority of the reviews presenting quantitative results reported improvement of depressive symptoms (5/6), but only one identified improvement in anxiety symptoms (1/3). One review reported improvement of general distress (42). The synthesis with the largest effect size included 108 primary studies with only web-based and internet cognitive behavior therapy (CBT) interventions (23). Most of the reviews that yielded narrative results reported improvement of depressive symptoms (6/7), improvement in anxiety symptoms (6/7) and psychosocial outcomes (1/1). Only one report of inferior effectiveness was identified for both depression and anxiety symptoms (18). Narrative reports described a small to moderate effect size within group in depression and anxiety symptoms. One integrative review report based on qualitative data described that digital health interventions for people with chronic diseases promoted active acceptance of their disease, improved the awareness of physical manifestations of the disease, helped identify signs and symptoms of worsening and improved management of acute events (18). The types of digital technology that had the most reports of improvements were web-based interventions, followed by e-mail. Virtual reality and patient portal had no reports of improvements on outcomes when used (Table 4).

### **Cancer Cluster**

We identified 14 reviews referring to people with cancer (Table 2). Quantitative reporting was present in six reviews (17, 24, 25, 30, 44, 46). Four (4/6) of those reported improvements of depressive symptoms, and half showed improvements in anxiety symptoms (3/6). Other quantitative reports of improvements in mental health outcomes included distress and quality of life. The quantitative report with the largest effect size included 20 primary studies, a total sample of 2190 participants, and looked at web-based and teleconsultations CBT interventions (17). Reviews that yielded narrative results reported improvements of depression symptoms (6/7), anxiety symptoms (5/5), distress (3/3), quality of life (1/1) and mood regulation (1/1). Pooling of the results was impossible in one review due to heterogeneity (12). The narrative outcome reports described a small effect size within group for depression and anxiety symptoms (21). The types of digital intervention that had the most reports of improvements were web-based interventions and e-mail. Virtual reality had no reports of improvements (Table 4)

### **Children and Youth Cluster**

We identified four reviews related to digital health interventions targeting children and youth (Table 2). Two reviews reported a quantitative synthesis presenting mixed effects; one showing within group improvements in depression and anxiety, and both showing no between group difference on these outcomes (20, 39). As for narrative syntheses, both reported improvements on depression and anxiety, with one of the reviews reporting on post-traumatic stress disorder (PTSD) symptoms improvement (28, 32). The limited reports on improvement for this population was associated with the used of web-based interventions (3/4), smart phone applications (2/4) and virtual reality (1/4) (Table 4).

### **Mental Health Cluster**

We identified four reviews related to population with mental health conditions (Table 2). The quantitative reports showed improvements in anxiety symptoms for generalized anxiety disorder and disease-specific anxiety (3/3), improvements of depression symptoms (1/1) and PTSD symptoms (1/1). The only narrative report for that cluster showed no improvement on

1  
2  
3 PTSD symptoms between groups (45). The types of digital technology that had the most  
4 reports of improvement were web-based interventions (3/4) and e-mail (2/4) with unique  
5 reports for smart phone applications, text-messages and online chat (table 4).  
6

## 7 8 **DISCUSSION**

9 We conducted a rapid review of systematic reviews to identify digital health interventions  
10 effective to prevent, detect or manage mental health problems in individuals with a pre-  
11 existing chronic disease. In total, 35 reviews were included.  
12

13 Our findings are in line with the extensive evidence that internet CBT interventions are  
14 effective and comparable to face-to-face interventions (47). Our analysis adds to the body of  
15 evidence on effectiveness regarding concomitant chronic diseases in four clusters of  
16 population. For people with various chronic diseases, most of the included reviews showed  
17 that digital health interventions have a positive effect on depression, anxiety, distress and  
18 psychosocial outcomes. The data showed that interventions have a moderate effect size  
19 within the intervention group and a small effect size when compared to usual care. For the  
20 cluster of population affected by cancer (including survival), evidence already exists  
21 regarding the effectiveness of digital mental health interventions with positive to mixed effect  
22 (48). Our data also showed that digital health interventions are effective in improving  
23 depression, anxiety, distress, quality of life and mood regulation. Also, teleconsultation and  
24 web-based interventions were the most effective modes of delivery for this population.  
25 Regarding the pediatric population, a meta-review targeting digital mental health  
26 interventions for children and youth reported a positive effect for the use of web-based CBT  
27 but only in children and youth with anxiety and depression with no other concomitant  
28 conditions (49). Quantitative data were inconclusive regarding effectiveness and effect size  
29 within group but showed a non-inferiority when compared to usual care. All included reviews  
30 in this population combined smart phone applications and web-based interventions, making it  
31 difficult to draw any conclusion about the most effective mode of delivery for the  
32 intervention at this level of analysis. For the mental health population, the included reviews  
33 emphasized that digital health interventions are effective for individuals with a combination  
34 of physical and mental conditions, as well as for people with multiple mental health  
35 problems.  
36  
37  
38  
39  
40

41 Available evidence suggests that digital health interventions such as web-based CBT, e-mail  
42 messaging and teleconsultation could be effective and provide an alternative to face-to-face  
43 psychological interventions to prevent and manage mental health problems in people affected  
44 by cancer or other chronic diseases. In line with our findings, Torous et al. described that  
45 offering health provider-directed synchronous digital health solutions such as teleconsultation  
46 is the first step to increase access to quality mental health care in the midst of the COVID-19  
47 pandemic (50). Many of these innovations support the care of people in need of special  
48 attention, including those with chronic illnesses. Due to smaller effect size, we were not able  
49 to draw any conclusion related to the other forms of digital health interventions such as  
50 online chat, text message and smart phone applications. These types of digital health  
51 interventions are asynchronous; they may improve access and promote low-threshold  
52 alternatives to mental health consultations within the health care system. However, more  
53 evidence regarding implementation and evaluation to be safe for patients would be required  
54 (50). Included reviews that looked at other intervention delivery methods reported smaller to  
55 no effect, but it could be related to heterogeneity of the data. Even with reports of  
56 effectiveness, there is still a lack of evidence of economic data to perform a proper cost  
57 analysis of digital health interventions (51, 52).  
58  
59  
60



1  
2  
3 This review was rapidly performed to inform knowledge users in a timely matter. In line with  
4 recommendations for rapid reviews (53), methods that would lead to a systematic review  
5 were not followed as strictly to allow for a faster methodology. We limited the scope of the  
6 search to the aim of the study by looking at limited databases and imposing a period of  
7 publication. These methodological choices resulted in the ability to perform an appropriate  
8 and structured study selection, data extraction and critical appraisal.  
9  
10

11 This rapid review of reviews has limitations. In order to respect the requirements of this  
12 urgent strategic call in response to the COVID-19 pandemic and provide stakeholders and  
13 decision makers with up-to-date evidence, we limited the search to the most relevant  
14 databases and the last 10 years. Despite our best efforts, we may have missed some  
15 publications. Moreover, we did not assess the overlapping of primary studies in the included  
16 reviews. While we rigorously followed guidance for the conduct of rapid reviews, results  
17 from this study should be interpreted with caution. Further analyses will be required for  
18 stronger recommendations, notably by considering the potential publication bias, as well as  
19 other factors that could decrease the level of confidence in the reported effects.  
20  
21

22 Future research on digital mental health interventions should provide economic data to give a  
23 broader insight for possible implementation. Research on digital mental health interventions  
24 could also further assess the safety and limitations of asynchronous and self-administered  
25 technologies. Finally, efforts should be put on developing a structured method to report what  
26 kind of technology (e.g.: internet-based, smartphone app) and function (e.g.: communication,  
27 intervention, evaluation) were used in the intervention. A structured method of reporting  
28 would improve the evidence precision and knowledge implementation.  
29  
30

## 31 **CONCLUSION**

32 This rapid review outlines the current evidence regarding the use of digital health  
33 interventions for people with a concomitant chronic disease. For individuals with a chronic  
34 disease or cancer, health provider-directed digital interventions (e.g., teleconsultation) are  
35 effective and safe. However, further analyses of this large body of evidence are required in  
36 order to provide precise recommendations regarding relevance for specific populations (such  
37 as children and youth), modes of delivery and type of intervention. In response to the current  
38 crisis, but also to better prepare for the post-crisis and future crises, digital technologies could  
39 be used to prevent and manage mental health problems in people living with chronic  
40 conditions, with consideration for the age group and type of technology used.  
41  
42

## 43 **ACKNOWLEDGEMENTS**

44 The authors would like to thank the knowledge users for their support throughout this review  
45 and the SPOR Evidence Alliance for their support.  
46  
47

## 48 **RESEARCH ETHICS APPROVAL**

49 Not applicable  
50  
51

## 52 **CONTRIBUTORSHIP STATEMENT**

53 Maxime Sasseville, Annie LeBlanc, Marie-Pierre Gagnon, Maud-Christine Chouinard,  
54 Marianne Beaulieu, Nicolas Beaudet, Pascale Cholette Christine Aspiros, Alain Larouche,  
55 Guylaine Chabot identified the need for this study and contributed to its conception and  
56 design. Becky Skidmore developed and conducted the search strategy. Maxime Sasseville,  
57 Marie-Pierre Gagnon, Mylène Boucher, Michèle Dugas, Mbemba Gisèle, Jack Tchuenta  
58 conducted the data collection and analysis. Maxime Sasseville developed the first draft of the  
59  
60



1  
2  
3 report. All authors contributed to writing and editing and gave the final approval of the  
4 version submitted.  
5

### 6 **COMPETING INTERESTS**

7  
8 The authors have no conflict of interests to declare.  
9

### 10 **FUNDING**

11 This review was funded by the Canadian Institute for Health Research in the Operating Grant:  
12 Knowledge Synthesis: COVID-19 in Mental Health & Substance Use. Grant number:  
13 202005CMS-442711-CMV-CFBA-111141  
14

15  
16 **DATA STATEMENT:** Available with reasonable request whit the first (MS) or last (MPG)  
17 authors.  
18

### 19 **FIGURES LEGENDS:**

20 Figure 1. PRISMA flow diagram of study inclusion process.

21 Figure 2. Overall critical appraisal of the included studies using the AMSTAR 2 tool.  
22  
23  
24  
25  
26  
27  
28  
29  
30  
31  
32  
33  
34  
35  
36  
37  
38  
39  
40  
41  
42  
43  
44  
45  
46  
47  
48  
49  
50  
51  
52  
53  
54  
55  
56  
57  
58  
59  
60

## REFERENCES

1. World Health Organisation. Global status report on noncommunicable diseases. Geneva, Switzerland; 2014.
2. Chapman DP, Perry GS, Strine TW. Peer reviewed: the vital link between chronic disease and depressive disorders. *Preventing Chronic Disease*. 2005;2(1).
3. Barnett K, Mercer SW, Norbury M, Watt G, Wyke S, Guthrie B. Epidemiology of multimorbidity and implications for health care, research, and medical education: a cross-sectional study. *The Lancet*. 2012;380(9836):37-43.
4. Naylor C, Parsonage M, McDaid D, Knapp M, Fossey M, Galea A. Long-term conditions and mental health: the cost of co-morbidities. The King's Fund and Centre for Mental Health; 2012.
5. Shigemura J, Ursano RJ, Morganstein JC, Kurosawa M, Benedek DM. Public responses to the novel 2019 coronavirus (2019-nCoV) in Japan: mental health consequences and target populations. *Psychiatry and clinical neurosciences*. 2020;74(4):281.
6. García-Lizana F, Muñoz-Mayorga I. Telemedicine for depression: a systematic review. *Perspective Psychiatry Care*. 2010;46(2):119-26.
7. Richards D, Richardson T. Computer-based psychological treatments for depression: a systematic review and meta-analysis. *Clinical Psychology Review*. 2012;32(4):329-42.
8. Garritty C GG, Kamel C, King VJ, Nussbaumer-Streit B, Stevens A, Hamel C, Affengruber L. Cochrane Rapid Reviews. . Interim Guidance from the Cochrane Rapid Reviews Methods Group. In: *Reviews*. CR, editor.: Cochrane Collaboration; 2020.
9. Moher D, Liberati A, Tetzlaff J, Altman DG. Preferred reporting items for systematic reviews and meta-analyses: the PRISMA statement. *PLoS Medicine*. 2009;6(7):e1000097.
10. Goldstein KM, Fisher DA, Wu RR, Orlando LA, Coffman CJ, Grubber JM, et al. An electronic family health history tool to identify and manage patients at increased risk for colorectal cancer: protocol for a randomized controlled trial. *Trials*. 2019;20(1):576.
11. Shea BJ, Reeves BC, Wells G, Thuku M, Hamel C, Moran J, et al. AMSTAR 2: a critical appraisal tool for systematic reviews that include randomised or non-randomised studies of healthcare interventions, or both. *BMJ*. 2017;358:j4008.
12. Agboola SO, Ju W, Elfiky A, Kvedar JC, Jethwani K. The effect of technology-based interventions on pain, depression, and quality of life in patients with cancer: a systematic review of randomized controlled trials. *Journal of Medical Internet Research*. 2015;17(3):e65.
13. Bartolo A, Pacheco E, Rodrigues F, Pereira A, Monteiro S, Santos IM. Effectiveness of psycho-educational interventions with telecommunication technologies on emotional distress and quality of life of adult cancer patients: a systematic review. *Disability & Rehabilitation*. 2019;41(8):870-8.
14. Beatty L, Lambert S. A systematic review of internet-based self-help therapeutic interventions to improve distress and disease-control among adults with chronic health conditions. *Clinical Psychology Review*. 2013;33(4):609-22.
15. Bouma G, Admiraal JM, de Vries EGE, Schroder CP, Walenkamp AME, Reyners AKL. Internet-based support programs to alleviate psychosocial and physical symptoms in cancer patients: A literature analysis. *Critical Reviews in Oncology/Hematology*. 2015;95(1):26-37.
16. Charova E, Dorstyn D, Tully P, Mittag O. Web-based interventions for comorbid depression and chronic illness: a systematic review. *Journal of Telemedicine & Telecare*. 2015;21(4):189-201.
17. Chen YY, Guan BS, Li ZK, Li XY. Effect of telehealth intervention on breast cancer patients' quality of life and psychological outcomes: A meta-analysis. *Journal of Telemedicine & Telecare*. 2018;24(3):157-67.
18. Clari M, Conti A, Fontanella R, Rossi A, Matarese M. Mindfulness-Based Programs for People with Chronic Obstructive Pulmonary Disease: a Mixed Methods Systematic Review. *Mindfulness*. 2020:20.

19. Eccleston C, Fisher E, Brown R, Craig L, Duggan GB, Rosser BA, et al. Psychological therapies (Internet-delivered) for the management of chronic pain in adults. *Cochrane Database of Systematic Reviews*. 2019(9).
20. Fisher E, Law E, Dudeney J, Eccleston C, Palermo TM. Psychological therapies (remotely delivered) for the management of chronic and recurrent pain in children and adolescents. *Cochrane Database of Systematic Reviews*. 2019(9).
21. Forbes CC, Finlay A, McIntosh M, Siddiquee S, Short CE. A systematic review of the feasibility, acceptability, and efficacy of online supportive care interventions targeting men with a history of prostate cancer. *Journal of Cancer Survivorship : Research and Practice*. 2019;13(1):75-96.
22. Fridriksdottir N, Gunnarsdottir S, Zoega S, Ingadottir B, Hafsteinsdottir EJG. Effects of web-based interventions on cancer patients' symptoms: review of randomized trials. *Supportive Care in Cancer*. 2018;26(2):337-51.
23. Hedman E, Ljotsson B, Lindefors N. Cognitive behavior therapy via the Internet: a systematic review of applications, clinical efficacy and cost-effectiveness. *Expert Review of Pharmacoeconomics & Outcomes Research*. 2012;12(6):745-64.
24. Kim AR, Park HA. Web-based Self-management Support Interventions for Cancer Survivors: A Systematic Review and Meta-analyses. *Studies in Health Technology & Informatics*. 2015;216:142-7.
25. Kim SH, Kim K, Mayer DK. Self-Management Intervention for Adult Cancer Survivors After Treatment: A Systematic Review and Meta-Analysis. *Oncology Nursing Forum*. 2017;44(6):719-28.
26. Lewis C, Roberts NP, Bethell A, Robertson L, Bisson JI. Internet-based cognitive and behavioural therapies for post-traumatic stress disorder (PTSD) in adults. *Cochrane Database of Systematic Reviews*. 2018(12).
27. Lin H, Ye M, Chan SWC, Zhu J, He H. The effectiveness of online interventions for patients with gynecological cancer: An integrative review. *Gynecologic Oncology*. 2020.
28. Lopez-Rodriguez MM, Fernandez-Millan A, Ruiz-Fernandez MD, Dobarrio-Sanz I, Fernandez-Medina IM. New Technologies to Improve Pain, Anxiety and Depression in Children and Adolescents with Cancer: A Systematic Review. *International Journal of Environmental Research & Public Health*. 2020;17(10):19.
29. MayoWilson E, Montgomery P. Media-delivered cognitive behavioural therapy and behavioural therapy (self-help) for anxiety disorders in adults. *Cochrane Database of Systematic Reviews*. 2013(9).
30. McCaughan E, Parahoo K, Hueter I, Northouse L, Bradbury I. Online support groups for women with breast cancer. *Cochrane Database of Systematic Reviews*. 2017;3:CD011652.
31. McCombie A, Geary R, Andrews J, Mikocka-Walus A, Mulder R. Computerised Cognitive Behavioural Therapy for Psychological Distress in Patients with Physical Illnesses: A Systematic Review. *Journal of Clinical Psychology in Medical Settings*. 2015;22(1):20-44.
32. McGar AB, Kindler C, Marsac M. Electronic Health Interventions for Preventing and Treating Negative Psychological Sequelae Resulting From Pediatric Medical Conditions: Systematic Review. *JMIR Pediatrics and Parenting*. 2019;2(2):e12427.
33. Mehta S, Peynenburg VA, Hadjistavropoulos HD. Internet-delivered cognitive behaviour therapy for chronic health conditions: a systematic review and meta-analysis. *Journal of Behavioral Medicine*. 2019;42(2):169-87.
34. Mikolasek M, Berg J, Witt CM, Barth J. Effectiveness of Mindfulness- and Relaxation-Based eHealth Interventions for Patients with Medical Conditions: a Systematic Review and Synthesis. *Int J Behav Med*. 2018;25(1):1-16.
35. Olthuis JV, Watt MC, Bailey K, Hayden JA, Stewart SH. Therapist-supported Internet cognitive behavioural therapy for anxiety disorders in adults. *Cochrane Database of Systematic Reviews*. 2016(3).
36. Palacios J, Lee GA, Duaso M, Clifton A, Norman IJ, Richards D, et al. Internet-Delivered Self-management Support for Improving Coronary Heart Disease and Self-management-Related Outcomes: A Systematic Review. *Journal of Cardiovascular Nursing*. 2017;32(4):E9-E23.

- 1  
2  
3 37. Paul CL, Carey ML, Sanson-Fisher RW, Houlcroft LE, Turon HE. The impact of web-based  
4 approaches on psychosocial health in chronic physical and mental health conditions. *Health*  
5 *Education Research*. 2013;28(3):450-71.
- 6 38. Qan'ir Y, Song L. Systematic review of technology-based interventions to improve anxiety,  
7 depression, and health-related quality of life among patients with prostate cancer. *Psycho-Oncology*.  
8 2019;28(8):1601-13.
- 9 39. Tang WX, Zhang LF, Ai YQ, Li ZS. Efficacy of Internet-delivered cognitive-behavioral therapy  
10 for the management of chronic pain in children and adolescents: A systematic review and meta-  
11 analysis. *Medicine*. 2018;97(36):e12061.
- 12 40. Toivonen KI, Zernicke K, Carlson LE. Web-Based Mindfulness Interventions for People With  
13 Physical Health Conditions: Systematic Review. *Journal of Medical Internet Research*.  
14 2017;19(8):e303.
- 15 41. Ugalde A, Haynes K, White V, Krishnasamy M, Boltong A, Schofield P, et al. Self-guided  
16 psychological interventions for people with cancer: A systematic review. *Asia-Pacific Journal of*  
17 *Clinical Oncology*. 2015;4):146.
- 18 42. van Beugen S, Ferwerda M, Hoeve D, Rovers MM, Spillekom-van Koulik S, van Middendorp H,  
19 et al. Internet-based cognitive behavioral therapy for patients with chronic somatic conditions: a  
20 meta-analytic review. *Journal of Medical Internet Research*. 2014;16(3):e88.
- 21 43. Vugts MAP, Joosen MCW, van der Geer JE, Zedlitz AMEE, Vrijhoef HJM. The effectiveness of  
22 various computer-based interventions for patients with chronic pain or functional somatic  
23 syndromes: A systematic review and meta-analysis. *PLoS ONE*. 2018;13 (5) (no  
24 pagination)(e0196467).
- 25 44. Wang Y, Lin Y, Chen J, Wang C, Hu R, Wu Y. Effects of Internet-based psycho-educational  
26 interventions on mental health and quality of life among cancer patients: a systematic review and  
27 meta-analysis. *Supportive Care in Cancer*. 2020;28(6):2541-52.
- 28 45. Wickersham A, Petrides PM, Williamson V, Leightley D. Efficacy of mobile application  
29 interventions for the treatment of post-traumatic stress disorder: A systematic review. *Digit Health*.  
30 2019;5:11.
- 31 46. Zeng Y, Zhang JE, Cheng ASK, Cheng H, Wefel JS. Meta-Analysis of the Efficacy of Virtual  
32 Reality-Based Interventions in Cancer-Related Symptom Management. *Integrative Cancer Therapies*.  
33 2019;18:1534735419871108.
- 34 47. Cuijpers P, Van Straten A, Andersson G. Internet-administered cognitive behavior therapy for  
35 health problems: a systematic review. *Journal of Behavioral Medicine*. 2008;31(2):169-77.
- 36 48. McAlpine H, Joubert L, Martin-Sanchez F, Merolli M, Drummond KJ. A systematic review of  
37 types and efficacy of online interventions for cancer patients. *Patient Education and Counseling*.  
38 2015;98(3):283-95.
- 39 49. Hollis C, Falconer CJ, Martin JL, Whittington C, Stockton S, Glazebrook C, et al. Annual  
40 Research Review: Digital health interventions for children and young people with mental health  
41 problems—a systematic and meta-review. *Journal of Child Psychology and Psychiatry*.  
42 2017;58(4):474-503.
- 43 50. Torous J, Myrick KJ, Rauseo-Ricupero N, Firth J. Digital mental health and COVID-19: Using  
44 technology today to accelerate the curve on access and quality tomorrow. *Journal of Medical*  
45 *Internet Research: Mental Health*. 2020;7(3):e18848.
- 46 51. Iribarren SJ, Cato K, Falzon L, Stone PW. What is the economic evidence for mHealth? A  
47 systematic review of economic evaluations of mHealth solutions. *PloS one*. 2017;12(2):e0170581.
- 48 52. Badawy SM, Kuhns LM. Economic evaluation of text-messaging and smartphone-based  
49 interventions to improve medication adherence in adolescents with chronic health conditions: a  
50 systematic review. *JMIR mHealth and uHealth*. 2016;4(4):e121.
- 51 53. Garritty C, Gartlehner G, Nussbaumer-Streit B, King VJ, Hamel C, Kamel C, et al. Cochrane  
52 Rapid Reviews Methods Group offers evidence-informed guidance to conduct rapid reviews. *Journal*  
53 *of Clinical Epidemiology*. 2020.

1  
2  
3  
4  
5  
6  
7  
8  
9  
10  
11  
12  
13  
14  
15  
16  
17  
18  
19  
20  
21  
22  
23  
24  
25  
26  
27  
28  
29  
30  
31  
32  
33  
34  
35  
36  
37  
38  
39  
40  
41  
42  
43  
44  
45  
46  
47  
48  
49  
50  
51  
52  
53  
54  
55  
56  
57  
58  
59  
60

For peer review only

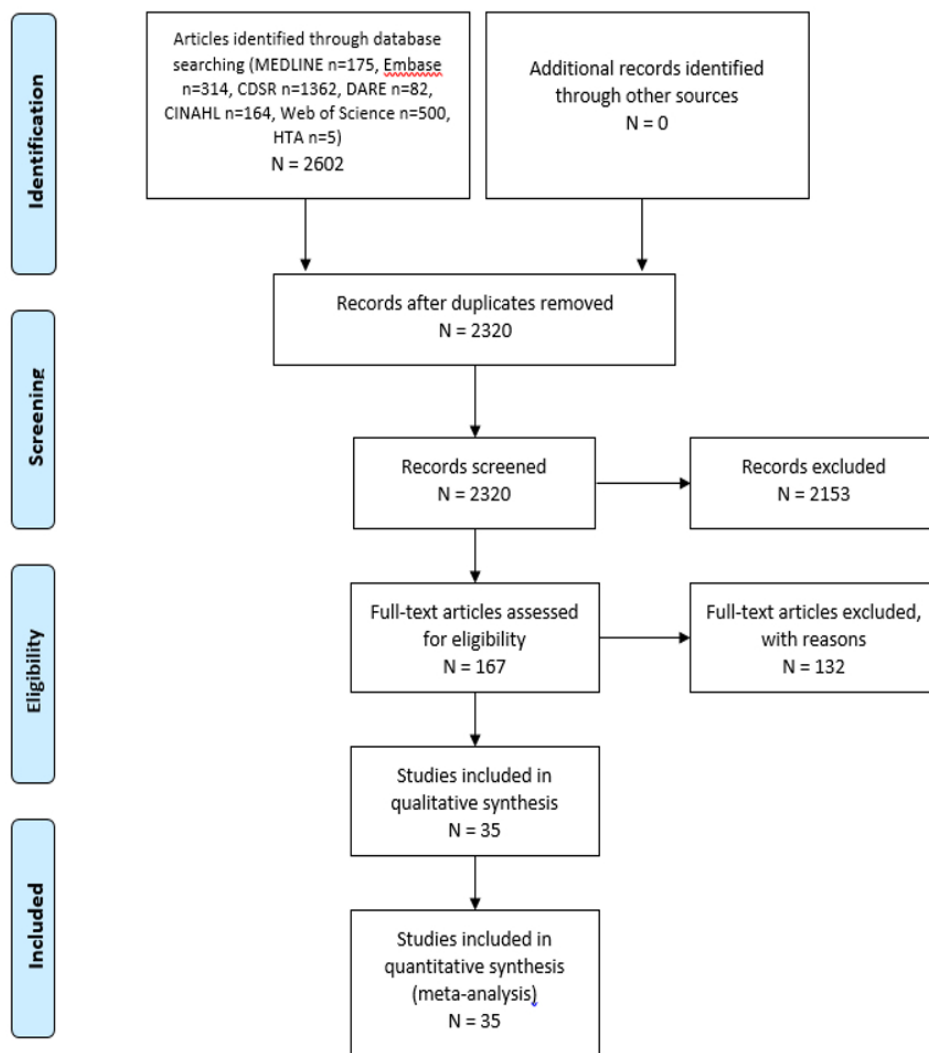

Figure 1. Study Flow Diagram

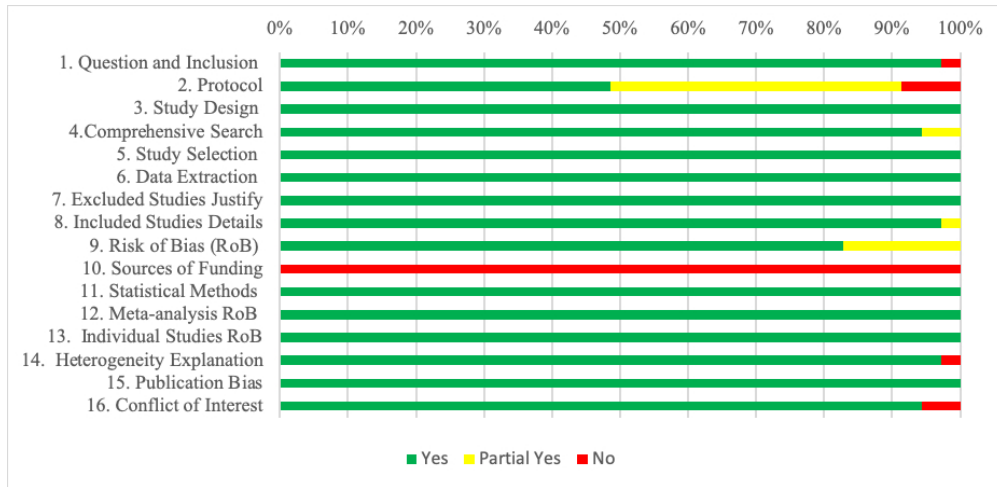

Figure 2. Risk of bias for individual items of the AMSTAR 2 tool.

**Additional Table 1. Type of intervention and outcomes**

|                                   | Web-based | Patient portal | Phone application | Virtual reality | Email | Text message | Online chat | Teleconsultation | Depression outcomes | Anxiety outcomes | Other mental health outcomes |
|-----------------------------------|-----------|----------------|-------------------|-----------------|-------|--------------|-------------|------------------|---------------------|------------------|------------------------------|
| <b>CHRONIC DISEASES CLUSTER</b>   |           |                |                   |                 |       |              |             |                  |                     |                  |                              |
| Hedman, 2012 (23)                 | X         |                |                   |                 |       |              |             |                  | +++                 | +++              | NR                           |
| Eccleston, 2019 (19)              | X         | X              |                   |                 |       |              |             | X                | =                   | =                | NR                           |
| van Beugen, 2014 (42)             | X         | X              |                   |                 | X     | X            | X           |                  | +                   | =                | =                            |
| Vugts, 2018 (43)                  | X         |                |                   |                 | X     | X            | X           | X                | +                   | NR               | NR                           |
| Charova 2015 (16)                 | X         |                |                   |                 |       |              |             |                  | +                   | NR               | NR                           |
| Palacios, 2017 (36)               | X         | X              |                   |                 | X     | X            |             |                  | +                   | NR               | NR                           |
| McCombie, 2015 (31)               | X         |                |                   |                 |       |              |             |                  | +                   | +                | NR                           |
| Beatty 2013 (14)                  | X         | X              |                   |                 | X     |              |             | X                | +                   | +                | NR                           |
| Toivonen, 2017(40)                | X         |                |                   |                 | X     |              | X           |                  | +                   | +                | NR                           |
| Mehta, 2018 (33)                  | X         |                |                   |                 | X     |              |             |                  | ++                  | +                | NR                           |
| Mikolasek, 2018 (34)              | X         |                |                   |                 |       |              |             |                  | +                   | +                | NR                           |
| Paul, 2013 (37)                   | X         |                |                   |                 |       |              | X           |                  | +                   | +                | +/-                          |
| Clari, 2020 (18)                  |           |                |                   |                 |       |              |             | X                | =                   | =                | NR                           |
| <b>CANCER POPULATION CLUSTER</b>  |           |                |                   |                 |       |              |             |                  |                     |                  |                              |
| Chen, 2018 (17)                   | X         |                |                   |                 |       |              |             | X                | +++                 | +                | +                            |
| McCaughan, 2017 (30)              | X         | X              |                   |                 | X     |              | X           |                  | =                   | +                | NR                           |
| Wang, 2020 (44)                   | X         |                | X                 |                 | X     |              |             |                  | +                   | ++               | NR                           |
| Zeng, 2019 (46)                   |           |                |                   | X               |       |              |             |                  | =                   | =                | NR                           |
| Kim, 2015 (24)                    | X         |                |                   |                 | X     | X            | X           | X                | +                   | +                | +                            |
| Kim, 2017 (25)                    | X         |                |                   |                 |       |              |             | X                | =                   | =                | NR                           |
| Lin, 2020 (27)                    | X         | X              |                   |                 | X     | X            |             |                  | +/-                 | +/-              | NR                           |
| Qan'ir, 2019 (38)                 | X         | X              |                   |                 |       |              | X           |                  | +/-                 | +/-              | NR                           |
| Forbes, 2019 (21)                 | X         |                |                   |                 | X     |              | X           |                  | +                   | NR               | +                            |
| Fridriksdottir, 2017 (22)         | X         |                |                   |                 | X     |              |             |                  | +/-                 | +/-              | +/-                          |
| Bouma 2015 (15)                   | X         |                |                   |                 |       |              |             |                  | +/-                 | +/-              | +/-                          |
| Ugalde, 2015 (41)                 | X         |                |                   |                 |       |              |             |                  | NR                  | NR               | +                            |
| Agboola 2015 (12)                 | X         | X              | X                 |                 | X     | X            | X           |                  | =                   | +/-              |                              |
| Bartolo 2019 (13)                 | X         |                |                   |                 | X     |              |             | X                | +                   | NR               | +                            |
| <b>YOUTH AND CHILDREN CLUSTER</b> |           |                |                   |                 |       |              |             |                  |                     |                  |                              |
| Fisher, 2019 (20)                 | X         | X              |                   |                 |       |              |             |                  | +                   | +                | NR                           |
| Tang, 2018 (39)                   | X         |                |                   |                 |       |              |             |                  | +                   | +++              | NR                           |
| McGar, 2019 (32)                  | X         |                |                   |                 |       |              |             |                  | +/-                 | +                | +                            |
| Lopez-Rodriguez, 2020 (28)        |           |                | X                 | X               |       |              |             |                  | +                   | +                | NR                           |
| <b>MENTAL HEALTH POPULATION</b>   |           |                |                   |                 |       |              |             |                  |                     |                  |                              |
| MayoWilson, 2013 (29)             | X         |                |                   |                 | X     | X            |             | X                | NR                  | ++               | NR                           |
| Olthuis, 2016 (35)                | X         | X              |                   |                 | X     |              | X           |                  | NR                  | ++               | NR                           |
| Wickersham, 2019 (45)             |           | X              |                   |                 |       |              |             |                  | NR                  | NR               | =                            |
| Lewis, 2018 (26)                  | X         |                |                   |                 |       |              |             |                  | ++                  | +                | ++                           |

NOTE: NR: not reported, + : small effect size or improvement without a report on effect size; ++ : moderate effect size ; +++ : large effect size; +/- : mixed effect ; = : no difference.



Chronic Disease – Mental Health  
 Final Strategies  
 2020 Jun 11

Ovid Multifile

Database: Ovid MEDLINE: Epub Ahead of Print, In-Process & Other Non-Indexed Citations, Ovid MEDLINE® Daily and Ovid MEDLINE® <1946-Present>, Embase Classic+Embase <1947 to 2020 June 10>  
 Search Strategy:

-----

- 1 exp Chronic Disease/ (463877)
- 2 ((chronic\* or longterm or long-term or longstanding or long-standing or ongoing or persisten\*) adj2 (comorbid\* or co-morbid\* or condition\* or disabilit\* or disease\* or disorder\* or ill or illness\* or morbidit\* or syndrom\* or symptom\*)).tw,kf. (817409)
- 3 1 or 2 [CHRONIC DISEASE - GENERAL] (1148521)
- 4 exp Arthritis/ (769208)
- 5 (arthriti\* or arthros#s or osteoarthriti\* or osteo-arthriti\* or osteoarthros#s or osteo-arthros#s or polyarthriti\* or poly-arthriti\* or spondylarthriti\* or spondyl-arthriti\*).tw,kf. (624493)
- 6 exp Asthma/ (402927)
- 7 asthma\*.tw,kf. (397483)
- 8 Chronic Pain/ (75237)
- 9 Pain, Intractable/ (9868)
- 10 ((chronic\* or constant\* or continual\* or continuous\* or ceaseless\* or endless\* or incessant\* or interminabl\* or intractable or longterm or long-term or nonstop\* or non-stop\* or perpetual\* or persist\* or recur\* or refractory or sustained or relentless\* or unabat\* or unceasing or unending or uninterrupt\* or unrelenting or unrelieved or unremit\*) adj3 (neuralgi\* or neuropath\* or pain\*)).tw,kf. (240054)
- 11 exp Neoplasms/ (8206156)
- 12 (neoplas\* or cancer\* or tumour\* or tumor\* or carcinoma\* or malignan\* or metasta\* or oncolog\*).tw,kf. (8138150)
- 13 (adenoma\* or adenocarcinoma\* or adeno-carcinoma\* or blastoma\* or carcinosarcoma\* or carcino-sarcoma\* or hematoma\* or hepatoblastoma\* or hepato-blastoma\* or leukemia\* or leukaemia\* or lymphoma\* or melanoma\* or mesenchymoma\* or mesothelioma\* or sarcoma\* or thymoma\*).tw,kf. (1224311)
- 14 Renal Insufficiency, Chronic/ (83228)
- 15 (chronic adj2 (renal or kidney\*) adj3 (condition\* or disease\* or disorder\* or fail\* or insufficien\*)).tw,kf. (202396)
- 16 (CKD or CKDs).tw,kf. (80295)
- 17 Diabetes Mellitus/ (704972)
- 18 Diabetes Mellitus, Type 1/ (112248)
- 19 Diabetes Mellitus, Type 2/ (196848)
- 20 Latent Autoimmune Diabetes in Adults/ (376)
- 21 diabet\*.tw,kf. (1602750)
- 22 ("Type 1" or "Type I" or "Type 2" or "Type II" or ID or NID) adj DM).tw,kf. (12572)
- 23 (IDDM or NIDDM).tw,kf. (27091)
- 24 exp Dyslipidemias/ (150214)
- 25 (dyslipidemi\* or dyslipoproteinemi\* or dyslipo-proteinemi\* or hyperlipemi\* or hyperlipid?emi\* or hyper-lipemi\* or hyper-lipid?emi\* or lipemi\* or lipid?emi\* or hypercholester?emi\* or hypercholester?emi\* or hypertriglyceridemi\* or hyper-triglyceridemi\*).tw,kf. (196503)

26 exp Inflammatory Bowel Diseases/ (238290)  
 27 (inflam\* adj1 (bowel\* or colon\*)).tw,kf. (134937)  
 28 IBD.tw,kf. (77069)  
 29 (Crohn or "Crohn's").tw,kf. (128042)  
 30 (ileitis adj2 (regional or terminal)).tw,kf. (2372)  
 31 (Ileocolitis or ileo-colitis).tw,kf. (1234)  
 32 ((proctocolitis or procto-colitis) adj2 idiopathic).tw,kf. (93)  
 33 ((colorectitis or proctocolitis or procto-colitis) adj2 (ulcer\* or mucosal)).tw,kf. (169)  
 34 colitis gravis.tw,kf. (11)  
 35 exp Pulmonary Disease, Chronic Obstructive/ (189609)  
 36 (chronic adj2 obstructi\* adj3 (pulmonary or airway\* or air way\* or lung or lungs or airflow\* or air  
 37 flow\* or bronchitis or bronchopulmonar\* or broncho-pulmonar\*)).tw,kf. (134589)  
 38 (emphysema? adj3 (pulmonary or airway\* or air way\* or lung or lungs or airflow\* or air flow\* or  
 39 centriacinar or centri-acinar or centrilobular or centri-lobular or panacinar or pan-acinar or panlobular  
 40 or pan-lobular)).tw,kf. (22235)  
 41 (COPD or COAD).tw,kf. (134068)  
 42 exp Cardiovascular Diseases/ (6804416)  
 43 ((artery or arteries or arterial or atrial\* or atrium\* or cardiac\* or cardio\* or cardiovascul\* or cardio-  
 44 vascul\* or coronary or heart\* or myocard\* or ventricle\*) adj3 (arrest\* or aneurysm\* or arrhythmia\* or  
 45 arrythmia\* or disease\* or disorder\* or dysrhythmia\* or dysrhythmia\* or dysfunction\* or failure\* or  
 46 fibrillation\* or ischemi\* or infarction\* or obstruct\* or occlu\* or rupture\* or stenosis or syndrom\* or  
 47 thrombo\* or vasospas\* or vaso-spas\*)).tw,kf. (2646364)  
 48 (arterioscleros\* or arterio-scleros\* or atheroscleros\* or athero-scleros\*).tw,kf. (312159)  
 49 hypertens\*.tw,kf. (1128918)  
 50 ((elevated or high\*) adj2 blood pressure\*).tw,kf. (81424)  
 51 or/4-43 [ITEMIZED CHRONIC DISEASES] (19898982)  
 52 3 or 44 [CHRONIC DISEASES, INCLUDING NAMED CONDITIONS] (20427001)  
 53 ((emotional\* or mental\* or psychological\* or social\*) adj2 health\* adj3 (disorder\* or morbidit\* or  
 54 comorbid\* or co-morbidit\* or problem\*)).tw,kf. (48561)  
 55 Mood Disorders/ (26170)  
 56 ((affective or mood) adj disorder?).tw,kf. (80447)  
 57 Cyclothymic Disorder/ (1679)  
 58 ((cyclothymic or cyclo-thymic) adj (disorder? or personalit\*)).tw,kf. (283)  
 59 exp Anxiety Disorders/ (324405)  
 60 exp Anxiety/ (303024)  
 61 (anxiety or anxieties or anxious\*).tw,kf. (489510)  
 62 GAD.tw,kf. (22867)  
 63 (hypervigilan\* or hyper-vigilan\* or nervous\*).tw,kf. (722745)  
 64 ((incessan\* or obsessive\* or persistan\* or intense\*) adj3 fear\*).tw,kf. (1060)  
 65 (agoraphobi\* or claustrophobi\* or homophobi\* or neophobi\* or xenophobi\*).tw,kf. (14836)  
 66 (neurocirculatory asthenia\* or cardiac neurosis or effort syndrome\* or hyperkinetic heart  
 67 syndrome\*).tw,kf. (1377)  
 68 (neurotic disorder\* or neurosis or psychoneurosis or psycho-neurosis).tw,kf. (25227)  
 69 (obsessive-compulsive or anankastic personalit\* or compulsive personalit\* or obsessive personalit\*  
 70 or hoarding or psychastheni\*).tw,kf. (44492)  
 71 (panic disorder\* or (panic adj2 attack\*)).tw,kf. (25995)  
 72 (phobia or phobias or phobic).tw,kf. (27494)  
 73 (catastrophization? or catastrophie\* or catastrophizing).tw,kf. (8601)

1  
 2  
 3 64 Attention Deficit Disorder with Hyperactivity/ (49515)  
 4 65 attention deficit\*.tw,kf. (67522)  
 5 66 (ADDH or ADHD).tw,kf. (61164)  
 6 67 ((hyperkinetic or hyper-kinetic) adj syndrome?).tw,kf. (891)  
 7 68 exp Depressive Disorder/ (590789)  
 8 69 Depression/ (488522)  
 9 70 depress\*.tw,kf. (1107871)  
 10 71 dysthym\*.tw,kf. (7359)  
 11 72 (feel\* blue or blues).tw,kf. (4041)  
 12 73 melanchol\*.tw,kf. (7378)  
 13 74 (MDD and mental).tw,kf. (4373)  
 14 75 Stress Disorders, Traumatic/ (37504)  
 15 76 Stress Disorders, Post-Traumatic/ (52151)  
 16 77 PTSD.tw,kf. (56027)  
 17 78 (stress disorder? adj3 (trauma\* or posttrauma\* or post-trauma\*)).tw,kf. (65507)  
 18 79 (neuros#s adj3 (trauma\* or posttrauma\* or post-trauma\*)).tw,kf. (723)  
 19 80 or/46-79 [MENTAL/MOOD DISORDERS - GENERAL AND NAMED] (2618889)  
 20 81 45 and 80 [CHRONIC DISEASE & MENTAL HEALTH PROBLEMS] (700259)  
 21 82 Computer Communication Networks/ (27176)  
 22 83 Local Area Networks/ (1636)  
 23 84 Internet/ (180650)  
 24 85 Internet-Based Intervention/ (311)  
 25 86 ((internet or online or web or web-based or web-site or website or www or cyber\* or smartphone\*  
 26 or smart phone\* or iphone\* or i-phone\* or ipad or i-pad or ipads or i-pads) adj3 (care or deliver\* or  
 27 healthcare or health care or consult\* or counsel\* or interven\* or monitor\* or psychiatr\* or rehab\* or  
 28 service? or treat\* or therap\*)).tw,kf. (47403)  
 29 87 Smartphone/ (16414)  
 30 88 ((internet or online or web or web-based or web-site or website or www or cyber\* or smartphone\*  
 31 or smart phone\* or iphone\* or i-phone\* or ipad or i-pad or ipads or i-pads) adj3 (app or apps or  
 32 application?)).tw,kf. (24259)  
 33 89 (mobile adj3 (app or apps or application?)).tw,kf. (14699)  
 34 90 (digital\* adj3 (care or healthcare or health care or interven\* or consult\* or counsel\* or monitor\* or  
 35 psychiatr\* or rehab\* or treat\* or therap\*)).tw,kf. (12470)  
 36 91 ((technology-based or technology-facilitated) adj3 (care or healthcare or health care or interven\*  
 37 or consult\* or counsel\* or monitor\* or psychiatr\* or rehab\* or treat\* or therap\*)).tw,kf. (1460)  
 38 92 (video\* adj3 (care or healthcare or health care or interven\* or consult\* or counsel\* or monitor\* or  
 39 psychiatr\* or rehab\* or treat\* or therap\*)).tw,kf. (21536)  
 40 93 (virtual\* adj3 (care or healthcare or health care or interven\* or consult\* or counsel\* or monitor\* or  
 41 psychiatr\* or rehab\* or treat\* or therap\*)).tw,kf. (8491)  
 42 94 Patient Portals/ (182923)  
 43 95 (patient? adj2 (portal or portals)).tw,kf. (11947)  
 44 96 ((health information or medical information or clinical information) adj3 (portal or portals)).tw,kf.  
 45 (155)  
 46 97 ((health data or medical data or clinical data) adj3 (portal or portals)).tw,kf. (67)  
 47 98 health portal?.tw,kf. (314)  
 48 99 Electronic Mail/ (24709)  
 49 100 (electronic mail\* or email\* or e-mail\*).tw,kf. (51152)  
 50 101 exp Telephone/ (60582)  
 51  
 52  
 53  
 54  
 55  
 56  
 57  
 58  
 59  
 60

- 1  
2  
3 102 (telephon\* or tele-phon\* or phone or phoned or phones or phoning or answering service? or  
4 telefacsimile\* or tele-facsimile\* or FAX).tw,kf. (209278)  
5 103 exp Television/ (49238)  
6 104 (televis\* or tele-vis\* or TV or TVs or videorecord\* or video-record\* or videotap\* or video  
7 tap\*).tw,kf. (116545)  
8 105 Videoconferencing/ (5321)  
9 106 (videoconferenc\* or video-conference\* or videophon\* or video-phon\*).tw,kf. (6099)  
10 107 Electronic Health Records/ (34655)  
11 108 electronic health record?.tw,kf. (37890)  
12 109 (EHR or EHRs or EMR or EMRs or PHR or PHRs).tw,kf. (46151)  
13 110 Hotlines/ (3062)  
14 111 hotline?.tw,kf. (2749)  
15 112 Telecommunications/ (30245)  
16 113 (telecommunicat\* or tele-communicat\*).tw,kf. (8599)  
17 114 exp Telemedicine/ (67951)  
18 115 Telenursing/ (487)  
19 116 (ehealth or e-health or mhealth or m-health or mobile health).tw,kf. (23436)  
20 117 (telecare or tele-care or teleconsult\* or tele-consult\* or telecounsel\* or tele-counsel\* or  
21 telehome\* or tele-home\* or telemed\* or tele-med\* or telemonitor\* or tele-monitor\* or telenurs\* or  
22 tele-nurs\* or telepsychiatr\* or tele-psychiatr\* or telerehab\* or tele-rehab\*).tw,kf. (37038)  
23 118 (remote\$2 adj3 (care or healthcare or health care or consult\* or counsel\* or interven\* or  
24 monitor\* or psychiatr\* or rehab\* or treat\* or therap\*).tw,kf. (17186)  
25 119 or/82-118 [DIGITAL HEALTH TECHNOLOGIES] (1032076)  
26 120 81 and 119 [CHRONIC DISEASE & MENTAL HEALTH PROBLEMS - DIGITAL HEALTH TECHNOLOGIES]  
27 (18971)  
28 121 Systematic Review.pt. (128913)  
29 122 exp Systematic Reviews as Topic/ (28375)  
30 123 Meta Analysis.pt. (115626)  
31 124 exp Meta-Analysis as Topic/ (61507)  
32 125 (meta-analy\* or metanaly\* or metaanaly\* or met analy\* or integrative research or integrative  
33 review\* or integrative overview\* or research integration or research overview\* or collaborative  
34 review\*).tw,kf. (411235)  
35 126 (systematic review\* or systematic overview\* or evidence-based review\* or evidence-based  
36 overview\* or (evidence adj3 (review\* or overview\*)) or meta-review\* or meta-overview\* or meta-  
37 synthes\* or rapid review\* or "review of reviews" or umbrella review? or technology assessment\* or HTA  
38 or HTAs).tw,kf. (492109)  
39 127 exp Technology Assessment, Biomedical/ (25470)  
40 128 (cochrane or health technology assessment or evidence report or systematic reviews).jw. (47503)  
41 129 (network adj (MA or MAs)).tw,kf. (30)  
42 130 (NMA or NMAs or MTC or MTCs or MAIC or MAICs).tw,kf. (17980)  
43 131 indirect\* compar\*.tw,kf. (5582)  
44 132 (indirect treatment\* adj1 compar\*).tw,kf. (910)  
45 133 (mixed treatment\* adj1 compar\*).tw,kf. (1327)  
46 134 (multiple treatment\* adj1 compar\*).tw,kf. (387)  
47 135 (multi-treatment\* adj1 compar\*).tw,kf. (8)  
48 136 simultaneous\* compar\*.tw,kf. (2407)  
49 137 mixed comparison?.tw,kf. (73)  
50 138 or/121-137 [REVIEWS] (850383)  
51  
52  
53  
54  
55  
56  
57  
58  
59  
60

1  
2  
3 139 120 and 138 [REVIEWS - CHRONIC DISEASE & MENTAL HEALTH PROBLEMS - DIGITAL HEALTH  
4 TECHNOLOGIES] (638)  
5 140 exp Animals/ not Humans/ (17305531)  
6 141 139 not 140 [ANIMAL-ONLY REMOVED] (431)  
7 142 limit 141 to yr="2010-current" (370)  
8 143 142 use ppez [MEDLINE RECORDS] (178)  
9 144 exp chronic disease/ (463877)  
10 145 ((chronic\* or longterm or long-term or longstanding or long-standing or ongoing or persisten\*)  
11 adj2 (comorbid\* or co-morbid\* or condition\* or disabilit\* or disease\* or disorder\* or ill or illness\* or  
12 morbidit\* or syndrom\* or symptom\*)).tw,kw. (822925)  
13 146 144 or 145 [CHRONIC DISEASE - GENERAL] (1153511)  
14 147 exp arthritis/ (769208)  
15 148 (arthriti\* or arthros#s or osteoarthriti\* or osteo-arthriti\* or osteoarthros#s or osteo-arthros#s or  
16 polyarthriti\* or poly-arthriti\* or spondylarthriti\* or spondyl-arthriti\*).tw,kw. (631277)  
17 149 exp asthma/ (402927)  
18 150 asthma\*.tw,kw. (402449)  
19 151 chronic pain/ (75237)  
20 152 intractable pain/ (11527)  
21 153 ((chronic\* or constant\* or continual\* or continuous\* or ceaseless\* or endless\* or incessant\* or  
22 interminabl\* or intractable or longterm or long-term or nonstop\* or non-stop\* or perpetual\* or persist\*  
23 or recur\* or refractory or sustained or relentless\* or unabat\* or unceasing or unending or uninterrupt\*  
24 or unrelenting or unrelieved or unremit\*) adj3 (neuralgi\* or neuropath\* or pain\*)).tw,kw. (242272)  
25 154 exp malignant neoplasm/ (6996129)  
26 155 (neoplas\* or cancer\* or tumour\* or tumor\* or carcinoma\* or malignan\* or metasta\* or  
27 oncolog\*).tw,kw. (8161179)  
28 156 (adenoma\* or adenocarcinoma\* or adeno-carcinoma\* or blastoma\* or carcinosarcoma\* or  
29 carcino-sarcoma\* or hematoma\* or hepatoblastoma\* or hepato-blastoma\* or leukemia\* or leukaemia\*  
30 or lymphoma\* or melanoma\* or mesenchymoma\* or mesothelioma\* or sarcoma\* or thymoma\*).tw,kw.  
31 (1236437)  
32 157 exp chronic kidney failure/ (193963)  
33 158 (chronic adj2 (renal or kidney\*) adj3 (condition\* or disease\* or disorder\* or fail\* or  
34 insufficien\*).tw,kw. (205098)  
35 159 (CKD or CKDs).tw,kw. (80787)  
36 160 diabetes mellitus/ (704972)  
37 161 exp insulin dependent diabetes mellitus/ (191892)  
38 162 non insulin dependent diabetes mellitus/ (385694)  
39 163 latent autoimmune diabetes in adults/ (376)  
40 164 diabet\*.tw,kw. (1614950)  
41 165 (("Type 1" or "Type I" or "Type 2" or "Type II" or ID or NID) adj DM).tw,kw. (12646)  
42 166 (IDDM or NIDDM).tw,kw. (27515)  
43 167 dyslipidemia/ (82310)  
44 168 (dyslipidemi\* or dyslipoproteinemi\* or dyslipo-proteinemi\* or hyperlipemi\* or hyperlipid?emi\* or  
45 hyper-lipemi\* or hyper-lipid?emi\* or lipemi\* or lipid?emi\* or hypercholester?emi\* or  
46 hypercholester?emi\* or hypertriglyceridemi\* or hyper-triglyceridemi\*).tw,kw. (200456)  
47 169 exp inflammatory bowel disease/ (238290)  
48 170 (inflam\* adj1 (bowel\* or colon\*)).tw,kw. (137715)  
49 171 IBD.tw,kw. (78120)  
50 172 (Crohn or "Crohn's").tw,kw. (129757)  
51  
52  
53  
54  
55  
56  
57  
58  
59  
60

- 1  
2  
3 173 (ileitis adj2 (regional or terminal)).tw,kw. (1952)  
4 174 (ileocolitis or ileo-colitis).tw,kw. (1242)  
5 175 ((proctocolitis or procto-colitis) adj2 idiopathic).tw,kw. (93)  
6 176 ((colorectitis or proctocolitis or procto-colitis) adj2 (ulcer\* or mucosal)).tw,kw. (171)  
7 177 colitis gravis.tw,kw. (11)  
8 178 chronic obstructive lung disease/ (173601)  
9 179 (chronic adj2 obstructi\* adj3 (pulmonary or airway\* or air way\* or lung or lungs or airflow\* or air  
10 flow\* or bronchitis or bronchopulmonar\* or broncho-pulmonar\*)).tw,kw. (136000)  
11 180 (emphysema? adj3 (pulmonary or airway\* or air way\* or lung or lungs or airflow\* or air flow\* or  
12 centriacinar or centri-acinar or centrilobular or centri-lobular or panacinar or pan-acinar or panlobular  
13 or pan-lobular)).tw,kw. (21052)  
14 181 (COPD or COAD).tw,kw. (136003)  
15 182 exp cardiovascular disease/ (6804416)  
16 183 ((artery or arteries or arterial or atrial\* or atrium\* or cardiac\* or cardio\* or cardiovascul\* or  
17 cardio-vascul\* or coronary or heart\* or myocard\* or ventricle\*) adj3 (arrest\* or aneurysm\* or  
18 arrhythmia\* or arrythmia\* or disease\* or disorder\* or dysrhythmia\* or dysrhythmia\* or dysfunction\* or  
19 failure\* or fibrillation\* or ischemi\* or infarction\* or obstruct\* or occlu\* or rupture\* or stenosis or  
20 syndrom\* or thrombo\* or vasospas\* or vaso-spas\*)).tw,kw. (2662750)  
21 184 (arterioscleros\* or arterio-scleros\* or atheroscleros\* or athero-scleros\*).tw,kw. (331070)  
22 185 hypertens\*.tw,kw. (1143312)  
23 186 ((elevated or high\*) adj2 blood pressure\*).tw,kw. (80499)  
24 187 or/147-186 [ITEMIZED CHRONIC DISEASES] (19642008)  
25 188 146 or 187 [CHRONIC DISEASES, INCLUDING NAMED CONDITIONS] (20175048)  
26 189 ((emotional\* or mental\* or psychological\* or social\*) adj2 health\* adj3 (disorder\* or morbidit\* or  
27 comorbid\* or co-morbidit\* or problem\*)).tw,kw. (48743)  
28 190 exp mood disorder/ (647316)  
29 191 ((affective or mood) adj disorder?).tw,kw. (82561)  
30 192 cyclothymia/ (1041)  
31 193 ((cyclothymic or cyclo-thymic) adj (disorder? or personalit\*)).tw,kw. (289)  
32 194 exp anxiety disorder/ (324405)  
33 195 exp anxiety/ (303024)  
34 196 (anxiety or anxieties or anxious\*).tw,kw. (494827)  
35 197 GAD.tw,kw. (23192)  
36 198 (hypervigilan\* or hyper-vigilan\* or nervous\*).tw,kw. (733406)  
37 199 ((incessan\* or obsessive\* or persistan\* or intense\*) adj3 fear\*).tw,kw. (1083)  
38 200 (agoraphobi\* or claustrophobi\* or homophobi\* or neophobi\* or xenophobi\*).tw,kw. (15157)  
39 201 (neurocirculatory asthenia\* or cardiac neuros#s or effort syndrome\* or hyperkinetic heart  
40 syndrome\*).tw,kw. (1416)  
41 202 (neurotic disorder\* or neuros#s or psychoneuros#s or psycho-neuros#s).tw,kw. (24072)  
42 203 (obsessive-compulsive or anankastic personalit\* or compulsive personalit\* or obsessive  
43 personalit\* or hoarding or psychastheni\*).tw,kw. (44330)  
44 204 (panic disorder\* or (panic adj2 attack\*)).tw,kw. (26305)  
45 205 (phobia or phobias or phobic).tw,kw. (28151)  
46 206 (catastroph#ation? or catastroph#e\* or catastroph#ing).tw,kw. (8668)  
47 207 attention deficit disorder/ (89404)  
48 208 attention deficit\*.tw,kw. (68677)  
49 209 (ADDH or ADHD).tw,kw. (62185)  
50 210 ((hyperkinetic or hyper-kinetic) adj syndrome?).tw,kw. (905)  
51  
52  
53  
54  
55  
56  
57  
58  
59



- 1  
2  
3 211 exp depression/ (600183)  
4 212 depress\*.tw,kw. (1116521)  
5 213 dysthym\*.tw,kw. (7464)  
6 214 (feel\* blue or blues).tw,kw. (4061)  
7 215 melanchol\*.tw,kw. (7472)  
8 216 (MDD and mental).tw,kw. (4396)  
9 217 PTSD.tw,kw. (57477)  
10 218 (stress disorder? adj3 (trauma\* or posttrauma\* or post-trauma\*)).tw,kw. (66525)  
11 219 (neuros#s adj3 (trauma\* or posttrauma\* or post-trauma\*)).tw,kw. (690)  
12 220 or/189-219 [MENTAL/MOOD DISORDERS - GENERAL AND NAMED] (2651384)  
13 221 188 and 220 [CHRONIC DISEASE & MENTAL HEALTH PROBLEMS] (708973)  
14 222 exp computer network/ (106780)  
15 223 internet/ (180650)  
16 224 web-based intervention/ (352)  
17 225 smartphone/ (16414)  
18 226 ((internet or online or web or web-based or web-site or website or www or cyber\* or  
19 smartphone\* or smart phone\* or iphone\* or i-phone\* or ipad or i-pad or ipads or i-pads) adj3 (care or  
20 deliver\* or healthcare or health care or consult\* or counsel\* or interven\* or monitor\* or psychiatr\* or  
21 rehab\* or service? or treat\* or therap\*)).tw,kw. (47924)  
22 227 ((internet or online or web or web-based or web-site or website or www or cyber\* or  
23 smartphone\* or smart phone\* or iphone\* or i-phone\* or ipad or i-pad or ipads or i-pads) adj3 (app or  
24 apps or application?)).tw,kw. (24398)  
25 228 (mobile adj3 (app or apps or application?)).tw,kw. (14549)  
26 229 ((technology-based or technology-facilitated) adj3 (care or healthcare or health care or interven\*  
27 or consult\* or counsel\* or monitor\* or psychiatr\* or rehab\* or treat\* or therap\*)).tw,kw. (1464)  
28 230 (digital\* adj3 (care or healthcare or health care or interven\* or consult\* or counsel\* or monitor\*  
29 or psychiatr\* or rehab\* or treat\* or therap\*)).tw,kw. (12381)  
30 231 (video\* adj3 (care or healthcare or health care or interven\* or consult\* or counsel\* or monitor\*  
31 or psychiatr\* or rehab\* or treat\* or therap\*)).tw,kw. (21785)  
32 232 (virtual\* adj3 (care or healthcare or health care or interven\* or consult\* or counsel\* or monitor\*  
33 or psychiatr\* or rehab\* or treat\* or therap\*)).tw,kw. (8752)  
34 233 (patient? adj2 (portal or portals)).tw,kw. (11948)  
35 234 ((health information or medical information or clinical information) adj3 (portal or  
36 portals)).tw,kw. (156)  
37 235 ((health data or medical data or clinical data) adj3 (portal or portals)).tw,kw. (67)  
38 236 health portal?.tw,kw. (322)  
39 237 e-mail/ (24709)  
40 238 (electronic mail\* or email\* or e-mail\*).tw,kw. (51262)  
41 239 telephone/ (50014)  
42 240 (telephon\* or tele-phon\* or phone or phoned or phones or phoning or answering service? or  
43 telefacsimile\* or tele-facsimile\* or FAX).tw,kw. (209337)  
44 241 television/ (30885)  
45 242 (televis\* or tele-vis\* or TV or TVs or videorecord\* or video-record\* or videotap\* or video  
46 tap\*).tw,kw. (116882)  
47 243 videoconferencing/ (5321)  
48 244 (videoconferenc\* or video-conference\* or videophon\* or video-phon\*).tw,kw. (6193)  
49 245 electronic health record/ (35864)  
50 246 electronic health record?.tw,kw. (39303)  
51  
52  
53  
54  
55  
56  
57  
58  
59  
60

1  
2  
3 247 electronic medical record/ (74370)  
4 248 electronic patient record/ (2304)  
5 249 (EHR or EHRs or EMR or EMRs or PHR or PHRs).tw,kw. (46430)  
6 250 hotline/ (3071)  
7 251 hotline?.tw,kw. (2776)  
8 252 telecommunication/ (30245)  
9 253 (telecommunicat\* or tele-communicat\*).tw,kw. (8768)  
10 254 exp Telemedicine/ (67951)  
11 255 (ehealth or e-health or mhealth or m-health or mobile health).tw,kw. (26439)  
12 256 (telecare or tele-care or teleconsult\* or tele-consult\* or telecounsel\* or tele-counsel\* or  
13 telehome\* or tele-home\* or telemed\* or tele-med\* or telemonitor\* or tele-monitor\* or telenurs\* or  
14 tele-nurs\* or telepsychiatr\* or tele-psychiatr\* or telerehab\* or tele-rehab\*).tw,kw. (40112)  
15 257 (remote\$2 adj3 (care or healthcare or health care or consult\* or counsel\* or interven\* or  
16 monitor\* or psychiatr\* or rehab\* or treat\* or therap\*).tw,kw. (17322)  
17 258 or/222-257 [DIGITAL HEALTH TECHNOLOGIES] (895464)  
18 259 221 and 258 [CHRONIC DISEASE & MENTAL HEALTH PROBLEMS - DIGITAL HEALTH  
19 TECHNOLOGIES] (16694)  
20 260 "systematic review"/ (377591)  
21 261 "systematic review (topic)"/ (24955)  
22 262 meta-analysis/ (304555)  
23 263 "meta analysis (topic)"/ (42125)  
24 264 (meta-analy\* or metanaly\* or metaanaly\* or met analy\* or integrative research or integrative  
25 review\* or integrative overview\* or research integration or research overview\* or collaborative  
26 review\*).tw,kw. (414401)  
27 265 (systematic review\* or systematic overview\* or evidence-based review\* or evidence-based  
28 overview\* or (evidence adj3 (review\* or overview\*)) or meta-review\* or meta-overview\* or meta-  
29 synthes\* or rapid review\* or "review of reviews" or umbrella review? or technology assessment\* or HTA  
30 or HTAs).tw,kw. (495920)  
31 266 biomedical technology assessment/ (24358)  
32 267 (cochrane or health technology assessment or evidence report or systematic reviews).jw. (47503)  
33 268 (network adj (MA or MAs)).tw,kw. (30)  
34 269 (NMA or NMAs or MTC or MTCs or MAIC or MAICs).tw,kw. (18036)  
35 270 indirect\* compar\*.tw,kw. (5663)  
36 271 (indirect treatment\* adj1 compar\*).tw,kw. (915)  
37 272 (mixed treatment\* adj1 compar\*).tw,kw. (1349)  
38 273 (multiple treatment\* adj1 compar\*).tw,kw. (394)  
39 274 (multi-treatment\* adj1 compar\*).tw,kw. (8)  
40 275 simultaneous\* compar\*.tw,kw. (2407)  
41 276 mixed comparison?.tw,kw. (74)  
42 277 or/260-276 [REVIEWS] (926988)  
43 278 259 and 277 [REVIEWS - CHRONIC DISEASE & MENTAL HEALTH PROBLEMS - DIGITAL HEALTH  
44 TECHNOLOGIES] (713)  
45 279 exp animal/ or exp animal experimentation/ or exp animal model/ or exp animal experiment/ or  
46 nonhuman/ or exp vertebrate/ (52856473)  
47 280 exp human/ or exp human experimentation/ or exp human experiment/ (40867893)  
48 281 279 not 280 (11990325)  
49 282 278 not 281 [ANIMAL-ONLY REMOVED] (711)  
50 283 limit 282 to yr="2010-current" (636)  
51  
52  
53  
54  
55  
56  
57  
58  
59  
60



1  
2  
3 284 283 use emczd [EMBASE RECORDS] (463)  
4 285 143 or 284 [BOTH DATABASES] (641)  
5 286 remove duplicates from 285 (489) [TOTAL UNIQUE RECORDS]  
6 287 286 use ppez [MEDLINE UNIQUE RECORDS] (175)  
7 288 286 use emczd [EMBASE UNIQUE RECORDS] (314)  
8  
9

10 \*\*\*\*\*

11 Cochrane Library

12  
13 Database: EBM Reviews - Cochrane Database of Systematic Reviews <2005 to June 03, 2020>, EBM  
14 Reviews - Database of Abstracts of Reviews of Effects <1st Quarter 2016>, EBM Reviews - Health  
15 Technology Assessment <4th Quarter 2016>  
16 Search Strategy:  
17 -----  
18

19 1 exp Chronic Disease/ (166)  
20 2 ((chronic\* or longterm or long-term or longstanding or long-standing or ongoing or persisten\*) adj2  
21 (comorbid\* or co-morbid\* or condition\* or disabilit\* or disease\* or disorder\* or ill or illness\* or  
22 morbidit\* or syndrom\* or symptom\*)).ti,ab,kw,tw. (5947)  
23 3 1 or 2 [CHRONIC DISEASE - GENERAL] (5947)  
24 4 exp Arthritis/ (253)  
25 5 (arthriti\* or arthros#s or osteoarthriti\* or osteo-arthriti\* or osteoarthros#s or osteo-arthros#s or  
26 polyarthriti\* or poly-arthriti\* or spondylarthriti\* or spondyl-arthriti\*).ti,ab,kw,tw. (2243)  
27 6 exp Asthma/ (105)  
28 7 asthma\*.ti,ab,kw,tw. (1488)  
29 8 Chronic Pain/ (24)  
30 9 Pain, Intractable/ (11)  
31 10 ((chronic\* or constant\* or continual\* or continuous\* or ceaseless\* or endless\* or incessant\* or  
32 interminabl\* or intractable or longterm or long-term or nonstop\* or non-stop\* or perpetual\* or persist\*  
33 or recur\* or refractory or sustained or relentless\* or unabat\* or unceasing or unending or uninterrupt\*  
34 or unrelenting or unrelieved or unremitt\*) adj3 (neuralgi\* or neuropath\* or pain\*)).ti,ab,kw,tw. (1912)  
35 11 exp Neoplasms/ (2532)  
36 12 (neoplas\* or cancer\* or tumour\* or tumor\* or carcinoma\* or malignan\* or metasta\* or  
37 oncolog\*).ti,ab,kw,tw. (13669)  
38 13 (adenoma\* or adenocarcinoma\* or adeno-carcinoma\* or blastoma\* or carcinosarcoma\* or carcino-  
39 sarcoma\* or hematoma\* or hepatoblastoma\* or hepato-blastoma\* or leukemia\* or leukaemia\* or  
40 lymphoma\* or melanoma\* or mesenchymoma\* or mesothelioma\* or sarcoma\* or  
41 thymoma\*).ti,ab,kw,tw. (1492)  
42 14 Renal Insufficiency, Chronic/ (13)  
43 15 (chronic adj2 (renal or kidney\*) adj3 (condition\* or disease\* or disorder\* or fail\* or  
44 insufficien\*).ti,ab,kw,tw. (764)  
45 16 (CKD or CKDs).ti,ab,kw,tw. (158)  
46 17 Diabetes Mellitus/ (137)  
47 18 Diabetes Mellitus, Type 1/ (65)  
48 19 Diabetes Mellitus, Type 2/ (118)  
49 20 Latent Autoimmune Diabetes in Adults/ (0)  
50 21 diabet\*.ti,ab,kw,tw. (5061)  
51 22 (["Type 1" or "Type I" or "Type 2" or "Type II" or ID or NID] adj DM).ti,ab,kw,tw. (19)  
52 23 (IDDM or NIDDM).ti,ab,kw,tw. (37)  
53  
54  
55  
56  
57  
58  
59  
60

- 1  
2  
3 24 exp Dyslipidemias/ (35)  
4 25 (dyslipidemi\* or dyslipoproteinemi\* or dyslipo-proteinemi\* or hyperlipemi\* or hyperlipid?emi\* or  
5 hyper-lipemi\* or hyper-lipid?emi\* or lipemi\* or lipid?emi\* or hypercholester?emi\* or  
6 hypercholester?emi\* or hypertriglyceridemi\* or hyper-triglyceridemi\*).ti,ab,kw,tw. (469)  
7 26 exp Inflammatory Bowel Diseases/ (62)  
8 27 (inflam\* adj1 (bowel\* or colon\*)).ti,ab,kw,tw. (424)  
9 28 IBD.ti,ab,kw,tw. (180)  
10 29 (Crohn or "Crohn's").ti,ab,kw,tw. (422)  
11 30 (ileitis adj2 (regional or terminal)).ti,ab,kw,tw. (5)  
12 31 (Ileocolitis or ileo-colitis).ti,ab,kw,tw. (10)  
13 32 ((proctocolitis or procto-colitis) adj2 idiopathic).ti,ab,kw,tw. (0)  
14 33 ((colorectitis or proctocolitis or procto-colitis) adj2 (ulcer\* or mucosal)).ti,ab,kw,tw. (9)  
15 34 colitis gravis.ti,ab,kw,tw. (1)  
16 35 exp Pulmonary Disease, Chronic Obstructive/ (112)  
17 36 (chronic adj2 obstructi\* adj3 (pulmonary or airway\* or air way\* or lung or lungs or airflow\* or air  
18 flow\* or bronchitis or bronchopulmonar\* or broncho-pulmonar\*)).ti,ab,kw,tw. (1020)  
19 37 (emphysema? adj3 (pulmonary or airway\* or air way\* or lung or lungs or airflow\* or air flow\* or  
20 centriacinar or centri-acinar or centrilobular or centri-lobular or panacinar or pan-acinar or panlobular  
21 or pan-lobular)).ti,ab,kw,tw. (120)  
22 38 (COPD or COAD).ti,ab,kw,tw. (658)  
23 39 exp Cardiovascular Diseases/ (1432)  
24 40 ((artery or arteries or arterial or atrial\* or atrium\* or cardiac\* or cardio\* or cardiovascul\* or cardio-  
25 vascul\* or coronary or heart\* or myocard\* or ventricle\*) adj3 (arrest\* or aneurysm\* or arrhythmia\* or  
26 arrhythmia\* or disease\* or disorder\* or dysrhythmia\* or dysrhythmia\* or dysfunction\* or failure\* or  
27 fibrillation\* or ischemi\* or infarction\* or obstruct\* or occlu\* or rupture\* or stenosis or syndrom\* or  
28 thrombo\* or vasospas\* or vaso-spas\*)).ti,ab,kw,tw. (8162)  
29 41 (arterioscleros\* or arterio-scleros\* or atheroscleros\* or athero-scleros\*).ti,ab,kw,tw. (424)  
30 42 hypertens\*.ti,ab,kw,tw. (3258)  
31 43 ((elevated or high\*) adj2 blood pressure\*).ti,ab,kw,tw. (556)  
32 44 or/4-43 [ITEMIZED CHRONIC DISEASES] (28740)  
33 45 3 or 44 [CHRONIC DISEASES, INCLUDING NAMED CONDITIONS] (30275)  
34 46 ((emotional\* or mental\* or psychological\* or social\*) adj2 health\* adj3 (disorder\* or morbidit\* or  
35 comorbid\* or co-morbidit\* or problem\*)).ti,ab,kw,tw. (502)  
36 47 Mood Disorders/ (11)  
37 48 ((affective or mood) adj disorder?).ti,ab,kw,tw. (594)  
38 49 Cyclothymic Disorder/ (0)  
39 50 ((cyclothymic or cyclo-thymic) adj (disorder? or personalit\*)).ti,ab,kw,tw. (64)  
40 51 exp Anxiety Disorders/ (70)  
41 52 exp Anxiety/ (22)  
42 53 (anxiety or anxieties or anxious\*).ti,ab,kw,tw. (3119)  
43 54 GAD.ti,ab,kw,tw. (86)  
44 55 (hypervigilan\* or hyper-vigilan\* or nervous\*).ti,ab,kw,tw. (1930)  
45 56 ((incessan\* or obsessive\* or persistan\* or intense\*) adj3 fear\*).ti,ab,kw,tw. (14)  
46 57 (agoraphobi\* or claustrophobi\* or homophobi\* or neophobi\* or xenophobi\*).ti,ab,kw,tw. (184)  
47 58 (neurocirculatory asthenia\* or cardiac neurosis or effort syndrome\* or hyperkinetic heart  
48 syndrome\*).ti,ab,kw,tw. (60)  
49 59 (neurotic disorder\* or neurosis or psychoneurosis or psycho-neurosis).ti,ab,kw,tw. (321)  
50  
51  
52  
53  
54  
55  
56  
57  
58  
59

- 1  
2  
3 60 (obsessive-compulsive or anankastic personalit\* or compulsive personalit\* or obsessive personalit\*  
4 or hoarding or psychastheni\*).ti,ab,kw,tw. (280)  
5  
6 61 (panic disorder\* or (panic adj2 attack\*)).ti,ab,kw,tw. (239)  
7 62 (phobia or phobias or phobic).ti,ab,kw,tw. (282)  
8 63 (catastroph#ation? or catastroph#e\* or catastroph#ing).ti,ab,kw,tw. (35)  
9 64 Attention Deficit Disorder with Hyperactivity/ (54)  
10 65 Attention Deficit Disorder with Hyperactivity/ (54)  
11 66 (ADDH or ADHD).ti,ab,kw,tw. (223)  
12 67 ((hyperkinetic or hyper-kinetic) adj syndrome?).ti,ab,kw,tw. (3)  
13 68 exp Depressive Disorder/ (97)  
14 69 Depression/ (73)  
15 70 depress\*.ti,ab,kw,tw. (4605)  
16 71 dysthym\*.ti,ab,kw,tw. (220)  
17 72 (feel\* blue or blues).ti,ab,kw,tw. (28)  
18 73 melanchol\*.ti,ab,kw,tw. (44)  
19 74 (MDD and mental).ti,ab,kw,tw. (54)  
20 75 Stress Disorders, Traumatic/ (2)  
21 76 Stress Disorders, Post-Traumatic/ (28)  
22 77 PTSD.ti,ab,kw,tw. (211)  
23 78 (stress disorder? adj3 (trauma\* or posttrauma\* or post-trauma\*)).ti,ab,kw,tw. (395)  
24 79 (neuros#s adj3 (trauma\* or posttrauma\* or post-trauma\*)).ti,ab,kw,tw. (9)  
25 80 or/46-79 [MENTAL/MOOD DISORDERS - GENERAL AND NAMED] (7124)  
26 81 45 and 80 [CHRONIC DISEASE & MENTAL HEALTH PROBLEMS] (4063)  
27 82 Computer Communication Networks/ (7)  
28 83 Local Area Networks/ (0)  
29 84 Internet/ (27)  
30 85 Internet-Based Intervention/ (0)  
31 86 ((internet or online or web or web-based or web-site or website or www or cyber\* or smartphone\*  
32 or smart phone\* or iphone\* or i-phone\* or ipad or i-pad or ipads or i-pads) adj3 (care or deliver\* or  
33 healthcare or health care or consult\* or counsel\* or interven\* or monitor\* or psychiatr\* or rehab\* or  
34 service? or treat\* or therap\*)).ti,ab,kw,tw. (592)  
35 87 Smartphone/ (0)  
36 88 ((internet or online or web or web-based or web-site or website or www or cyber\* or smartphone\*  
37 or smart phone\* or iphone\* or i-phone\* or ipad or i-pad or ipads or i-pads) adj3 (app or apps or  
38 application?)).ti,ab,kw,tw. (108)  
39 89 (mobile adj3 (app or apps or application?)).ti,ab,kw,tw. (81)  
40 90 (digital\* adj3 (care or healthcare or health care or interven\* or consult\* or counsel\* or monitor\* or  
41 psychiatr\* or rehab\* or treat\* or therap\*)).ti,ab,kw,tw. (64)  
42 91 ((technology-based or technology-facilitated) adj3 (care or healthcare or health care or interven\*  
43 or consult\* or counsel\* or monitor\* or psychiatr\* or rehab\* or treat\* or therap\*)).ti,ab,kw,tw. (43)  
44 92 (video\* adj3 (care or healthcare or health care or interven\* or consult\* or counsel\* or monitor\* or  
45 psychiatr\* or rehab\* or treat\* or therap\*)).ti,ab,kw,tw. (217)  
46 93 (virtual\* adj3 (care or healthcare or health care or interven\* or consult\* or counsel\* or monitor\* or  
47 psychiatr\* or rehab\* or treat\* or therap\*)).ti,ab,kw,tw. (88)  
48 94 Patient Portals/ (0)  
49 95 (patient? adj2 (portal or portals)).ti,ab,kw,tw. (29)  
50 96 ((health information or medical information or clinical information) adj3 (portal or  
51 portals)).ti,ab,kw,tw. (0)  
52  
53  
54  
55  
56  
57  
58  
59  
60

97 ((health data or medical data or clinical data) adj3 (portal or portals)).ti,ab,kw,tw. (0)  
 98 health portal?.ti,ab,kw,tw. (1)  
 99 Electronic Mail/ (0)  
 100 (electronic mail\* or email\* or e-mail\*).ti,ab,kw,tw. (2207)  
 101 exp Telephone/ (21)  
 102 (telephon\* or tele-phon\* or phone or phoned or phones or phoning or answering service? or telefacsimile\* or tele-facsimile\* or FAX).ti,ab,kw,tw. (3243)  
 103 exp Television/ (3)  
 104 (televis\* or tele-vis\* or TV or TVs or videorecord\* or video-record\* or videotap\* or video tap\*).ti,ab,kw,tw. (510)  
 105 Videoconferencing/ (2)  
 106 (videoconferenc\* or video-conference\* or videophon\* or video-phon\*).ti,ab,kw,tw. (81)  
 107 Electronic Health Records/ (5)  
 108 electronic health record?.ti,ab,kw,tw. (64)  
 109 (EHR or EHRs or EMR or EMRs or PHR or PHRs).ti,ab,kw,tw. (38)  
 110 Hotlines/ (1)  
 111 hotline?.ti,ab,kw,tw. (44)  
 112 Telecommunications/ (6)  
 113 (telecommunicat\* or tele-communicat\*).ti,ab,kw,tw. (107)  
 114 exp Telemedicine/ (124)  
 115 Telenursing/ (1)  
 116 (ehealth or e-health or mhealth or m-health or mobile health).ti,ab,kw,tw. (147)  
 117 (telecare or tele-care or teleconsult\* or tele-consult\* or telecounsel\* or tele-counsel\* or telehome\* or tele-home\* or telemed\* or tele-med\* or telemonitor\* or tele-monitor\* or telenurs\* or tele-nurs\* or telepsychiatr\* or tele-psychiatr\* or telerehab\* or tele-rehab\*).ti,ab,kw,tw. (444)  
 118 (remote\$2 adj3 (care or healthcare or health care or consult\* or counsel\* or interven\* or monitor\* or psychiatr\* or rehab\* or treat\* or therap\*)).ti,ab,kw,tw. (206)  
 119 or/82-118 [DIGITAL HEALTH TECHNOLOGIES] (5328)  
 120 81 and 119 [CHRONIC DISEASE & MENTAL HEALTH PROBLEMS - DIGITAL HEALTH TECHNOLOGIES] (1688)  
 121 limit 120 to yr="2010-current" [Limit not valid in DARE; records were retained] (1449)  
 122 remove duplicates from 121 (1449) [TOTAL UNIQUE RECORDS]  
 123 122 use coch [CDSR UNIQUE RECORDS] (1362)  
 124 122 use dare [DARE UNIQUE RECORDS] (82)  
 125 122 use clhta [HTA UNIQUE RECORDS] (5)

\*\*\*\*\*

#### CINAHL

| #    | Query         | Limiters/Expanders                                                               | Last Run Via                                                            | Results |
|------|---------------|----------------------------------------------------------------------------------|-------------------------------------------------------------------------|---------|
| S125 | S110 AND S123 | Limiters - Published<br>Date: 20100101-20201231<br>Search modes - Boolean/Phrase | Interface - EBSCOhost<br>Research Databases<br>Search Screen - Advanced | 164     |

|      |                                                                                              |                               |                                                                                                                |         |
|------|----------------------------------------------------------------------------------------------|-------------------------------|----------------------------------------------------------------------------------------------------------------|---------|
|      |                                                                                              |                               | Search Database - CINAHL Plus with Full Text                                                                   |         |
| S124 | S110 AND S123                                                                                | Search modes - Boolean/Phrase | Interface - EBSCOhost Research Databases Search Screen - Advanced Search Database - CINAHL Plus with Full Text | 188     |
| S123 | S111 OR S112 OR S113 OR S114 OR S115 OR S116 OR S117 OR S118 OR S119 OR S120 OR S121 OR S122 | Search modes - Boolean/Phrase | Interface - EBSCOhost Research Databases Search Screen - Advanced Search Database - CINAHL Plus with Full Text | 200,742 |
| S122 | TI simultaneous* W0 compar* OR AB simultaneous* W0 compar*                                   | Search modes - Boolean/Phrase | Interface - EBSCOhost Research Databases Search Screen - Advanced Search Database - CINAHL Plus with Full Text | 145     |
| S121 | TI (multi W0 treatment*) N1 compar* OR AB (multi W0 treatment*) N1 compar*                   | Search modes - Boolean/Phrase | Interface - EBSCOhost Research Databases                                                                       | 2       |

|      |                                                                                     |                                  |                                                                                                                                                 |     |
|------|-------------------------------------------------------------------------------------|----------------------------------|-------------------------------------------------------------------------------------------------------------------------------------------------|-----|
|      |                                                                                     |                                  | Search<br>Screen -<br>Advanced<br>Search<br>Database -<br>CINAHL Plus<br>with Full<br>Text                                                      |     |
| S120 | TI (multiple W0 treatment*) N1 compar* OR AB<br>(multiple W0 treatment*) N1 compar* | Search modes -<br>Boolean/Phrase | Interface -<br>EBSCOhost<br>Research<br>Databases<br>Search<br>Screen -<br>Advanced<br>Search<br>Database -<br>CINAHL Plus<br>with Full<br>Text | 75  |
| S119 | TI (mixed W0 treatment*) N1 compar* OR AB<br>(mixed W0 treatment*) N1 compar*       | Search modes -<br>Boolean/Phrase | Interface -<br>EBSCOhost<br>Research<br>Databases<br>Search<br>Screen -<br>Advanced<br>Search<br>Database -<br>CINAHL Plus<br>with Full<br>Text | 229 |
| S118 | TI (indirect W0 treatment*) N1 compar* OR AB<br>(indirect W0 treatment*) N1 compar* | Search modes -<br>Boolean/Phrase | Interface -<br>EBSCOhost<br>Research<br>Databases<br>Search<br>Screen -<br>Advanced<br>Search<br>Database -<br>CINAHL Plus<br>with Full<br>Text | 109 |

|      |                                                                                                                                                                                                                                                                                                                                                                                                                                                       |                               |                                                                                                                |         |
|------|-------------------------------------------------------------------------------------------------------------------------------------------------------------------------------------------------------------------------------------------------------------------------------------------------------------------------------------------------------------------------------------------------------------------------------------------------------|-------------------------------|----------------------------------------------------------------------------------------------------------------|---------|
| S117 | TI indirect* W0 compar* OR AB indirect* W0 compar*                                                                                                                                                                                                                                                                                                                                                                                                    | Search modes - Boolean/Phrase | Interface - EBSCOhost Research Databases Search Screen - Advanced Search Database - CINAHL Plus with Full Text | 818     |
| S116 | TI ( NMA or NMAs or MTC or MTCs or MAIC or MAICs ) OR AB ( NMA or NMAs or MTC or MTCs or MAIC or MAICs )                                                                                                                                                                                                                                                                                                                                              | Search modes - Boolean/Phrase | Interface - EBSCOhost Research Databases Search Screen - Advanced Search Database - CINAHL Plus with Full Text | 1,002   |
| S115 | TI ( network W0 (MA or MAs) ) OR AB ( network W0 (MA or MAs) )                                                                                                                                                                                                                                                                                                                                                                                        | Search modes - Boolean/Phrase | Interface - EBSCOhost Research Databases Search Screen - Advanced Search Database - CINAHL Plus with Full Text | 4       |
| S114 | TI ( "systematic review" or "systematic reviews" or "systematic overview" or "systematic overviews" or "evidence-based review" or "evidence-based reviews" or "evidence-based overview" or "evidence-based overviews" or (evidence N3 (review* or overview*)) or "meta-review" or "meta-reviews" or "meta-overview" or "meta-overviews" or (meta W0 synthes*) or "rapid review" or "rapid reviews" or "review of reviews" or (umbrella W0 review#) or | Search modes - Boolean/Phrase | Interface - EBSCOhost Research Databases Search Screen - Advanced Search Database - CINAHL Plus                | 121,130 |

|      |                                                                                                                                                                                                                                                                                                                                                                                                                                                                                                                                                       |                               |                                                                                                                |        |
|------|-------------------------------------------------------------------------------------------------------------------------------------------------------------------------------------------------------------------------------------------------------------------------------------------------------------------------------------------------------------------------------------------------------------------------------------------------------------------------------------------------------------------------------------------------------|-------------------------------|----------------------------------------------------------------------------------------------------------------|--------|
|      | (technology W0 assessment*) or HTA or HTAs )<br>OR AB ( "systematic review" or "systematic reviews" or "systematic overview" or "systematic overviews" or "evidence-based review" or "evidence-based reviews" or "evidence-based overview" or "evidence-based overviews" or (evidence N3 (review* or overview*)) or "meta-review" or "meta-reviews" or "meta-overview" or "meta-overviews" or (meta W0 synthes*) or "rapid review" or "rapid reviews" or "review of reviews" or (umbrella W0 review#) or (technology W0 assessment*) or HTA or HTAs ) |                               | with Full Text                                                                                                 |        |
| S113 | TI ( (meta W0 analy*) or metanaly* or metaanaly* or (met W0 analy*) or "integrative research" or (integrative W0 review*) or (integrative W0 overview*) or "research integration" or (research W0 overview*) or (collaborative W0 review*) ) OR AB ( (meta W0 analy*) or metanaly* or metaanaly* or (met W0 analy*) or "integrative research" or (integrative W0 review*) or (integrative W0 overview*) or "research integration" or (research W0 overview*) or (collaborative W0 review*) )                                                          | Search modes - Boolean/Phrase | Interface - EBSCOhost Research Databases Search Screen - Advanced Search Database - CINAHL Plus with Full Text | 77,959 |
| S112 | (MH "Meta Analysis") OR (MH "Meta Synthesis")                                                                                                                                                                                                                                                                                                                                                                                                                                                                                                         | Search modes - Boolean/Phrase | Interface - EBSCOhost Research Databases Search Screen - Advanced Search Database - CINAHL Plus with Full Text | 52,660 |
| S111 | MH "Systematic Review"                                                                                                                                                                                                                                                                                                                                                                                                                                                                                                                                | Search modes - Boolean/Phrase | Interface - EBSCOhost Research Databases Search Screen - Advanced Search Database -                            | 95,081 |



|      |                                                                                                                                                                                                                                                                                                                |                               |                                                                                                                |         |
|------|----------------------------------------------------------------------------------------------------------------------------------------------------------------------------------------------------------------------------------------------------------------------------------------------------------------|-------------------------------|----------------------------------------------------------------------------------------------------------------|---------|
|      |                                                                                                                                                                                                                                                                                                                |                               | CINAHL Plus with Full Text                                                                                     |         |
| S110 | S72 AND S109                                                                                                                                                                                                                                                                                                   | Search modes - Boolean/Phrase | Interface - EBSCOhost Research Databases Search Screen - Advanced Search Database - CINAHL Plus with Full Text | 3,893   |
| S109 | S73 OR S74 OR S75 OR S76 OR S77 OR S78 OR S79 OR S80 OR S81 OR S82 OR S83 OR S84 OR S85 OR S86 OR S87 OR S88 OR S89 OR S90 OR S91 OR S92 OR S93 OR S94 OR S95 OR S96 OR S97 OR S98 OR S99 OR S100 OR S101 OR S102 OR S103 OR S104 OR S105 OR S106 OR S107 OR S108                                              | Search modes - Boolean/Phrase | Interface - EBSCOhost Research Databases Search Screen - Advanced Search Database - CINAHL Plus with Full Text | 335,223 |
| S108 | TI ( remote* N3 (care or healthcare or "health care" or consult* or counsel* or interven* or monitor* or psychiatr* or rehab* or treat* or therap*) ) OR AB ( remote* N3 (care or healthcare or "health care" or consult* or counsel* or interven* or monitor* or psychiatr* or rehab* or treat* or therap*) ) | Search modes - Boolean/Phrase | Interface - EBSCOhost Research Databases Search Screen - Advanced Search Database - CINAHL Plus with Full Text | 3,227   |
| S107 | TI ( telecare or "tele-care" or teleconsult* or (tele W0 consult*) or telecounsel* or (tele W0 counsel*) or telehome* or (tele W0 home*) or telemed* or (tele W0 med*) or telemonitor* or (tele W0 monitor*) or telenurs* or (tele W0 nurs*) or telepsychiatr* or (tele W0 psychiatr*)                         | Search modes - Boolean/Phrase | Interface - EBSCOhost Research Databases Search Screen -                                                       | 8,057   |

|      |                                                                                                                                                                                                                                                                                                                                                                 |                               |                                                                                                                |        |
|------|-----------------------------------------------------------------------------------------------------------------------------------------------------------------------------------------------------------------------------------------------------------------------------------------------------------------------------------------------------------------|-------------------------------|----------------------------------------------------------------------------------------------------------------|--------|
|      | or telerehab* or (tele W0 rehab* ) OR AB ( telecare or "tele-care" or teleconsult* or (tele W0 consult*) or telecounsel* or (tele W0 counsel*) or telehome* or (tele W0 home*) or telemed* or (tele W0 med*) or telemonitor* or (tele W0 monitor*) or telenurs* or (tele W0 nurs*) or telepsychiatr* or (tele W0 psychiatr*) or telerehab* or (tele W0 rehab* ) |                               | Advanced Search Database - CINAHL Plus with Full Text                                                          |        |
| S106 | TI ( ehealth or "e-health" or mhealth or "m-health" or mobile health ) OR AB ( ehealth or "e-health" or mhealth or "m-health" or mobile health )                                                                                                                                                                                                                | Search modes - Boolean/Phrase | Interface - EBSCOhost Research Databases Search Screen - Advanced Search Database - CINAHL Plus with Full Text | 6,246  |
| S105 | (MH "Telenursing")                                                                                                                                                                                                                                                                                                                                              | Search modes - Boolean/Phrase | Interface - EBSCOhost Research Databases Search Screen - Advanced Search Database - CINAHL Plus with Full Text | 2,178  |
| S104 | (MH "Telemedicine+") OR (MH "Telepsychiatry")                                                                                                                                                                                                                                                                                                                   | Search modes - Boolean/Phrase | Interface - EBSCOhost Research Databases Search Screen - Advanced Search Database - CINAHL Plus with Full Text | 14,054 |

|      |                                                                                                    |                               |                                                                                                                |       |
|------|----------------------------------------------------------------------------------------------------|-------------------------------|----------------------------------------------------------------------------------------------------------------|-------|
| S103 | TI ( telecommunicat* or (tele W0 communicat* ) OR AB ( telecommunicat* or (tele W0 communicat* ) ) | Search modes - Boolean/Phrase | Interface - EBSCOhost Research Databases Search Screen - Advanced Search Database - CINAHL Plus with Full Text | 1,110 |
| S102 | (MH "Telecommunications")                                                                          | Search modes - Boolean/Phrase | Interface - EBSCOhost Research Databases Search Screen - Advanced Search Database - CINAHL Plus with Full Text | 2,431 |
| S101 | TI hotline# OR AB hotline#                                                                         | Search modes - Boolean/Phrase | Interface - EBSCOhost Research Databases Search Screen - Advanced Search Database - CINAHL Plus with Full Text | 813   |
| S100 | (MH "Telephone Information Services")                                                              | Search modes - Boolean/Phrase | Interface - EBSCOhost Research Databases Search Screen - Advanced Search Database - CINAHL Plus                | 3,343 |

|     |                                                                                                                                                                        |                               |                                                                                                                |        |
|-----|------------------------------------------------------------------------------------------------------------------------------------------------------------------------|-------------------------------|----------------------------------------------------------------------------------------------------------------|--------|
|     |                                                                                                                                                                        |                               | with Full Text                                                                                                 |        |
| S99 | TI ( EHR or EHRs or EMR or EMRs or PHR or PHRs ) OR AB ( EHR or EHRs or EMR or EMRs or PHR or PHRs )                                                                   | Search modes - Boolean/Phrase | Interface - EBSCOhost Research Databases Search Screen - Advanced Search Database - CINAHL Plus with Full Text | 11,465 |
| S98 | TI ( "electronic health record" or "electronic health records" ) OR AB ( "electronic health record" or "electronic health records" )                                   | Search modes - Boolean/Phrase | Interface - EBSCOhost Research Databases Search Screen - Advanced Search Database - CINAHL Plus with Full Text | 11,666 |
| S97 | MH "Electronic Health Records"                                                                                                                                         | Search modes - Boolean/Phrase | Interface - EBSCOhost Research Databases Search Screen - Advanced Search Database - CINAHL Plus with Full Text | 26,377 |
| S96 | TI ( videoconferenc* or (video W0 conferenc*) or videophon* or (video W0 phon*) ) OR AB ( videoconferenc* or (video W0 conferenc*) or videophon* or (video W0 phon*) ) | Search modes - Boolean/Phrase | Interface - EBSCOhost Research Databases Search Screen - Advanced                                              | 1,879  |

|     |                                                                                                                                                                                                                                                |                               |                                                                                                                |        |
|-----|------------------------------------------------------------------------------------------------------------------------------------------------------------------------------------------------------------------------------------------------|-------------------------------|----------------------------------------------------------------------------------------------------------------|--------|
|     |                                                                                                                                                                                                                                                |                               | Search Database - CINAHL Plus with Full Text                                                                   |        |
| S95 | (MH "Videoconferencing+")                                                                                                                                                                                                                      | Search modes - Boolean/Phrase | Interface - EBSCOhost Research Databases Search Screen - Advanced Search Database - CINAHL Plus with Full Text | 3,141  |
| S94 | TI ( televis* or (tele W0 vis*) or TV or TVs or videorecord* or (video W0 record*) or videotap* or (video W0 tap*). ) OR AB ( televis* or (tele W0 vis*) or TV or TVs or videorecord* or (video W0 record*) or videotap* or (video W0 tap*). ) | Search modes - Boolean/Phrase | Interface - EBSCOhost Research Databases Search Screen - Advanced Search Database - CINAHL Plus with Full Text | 21,412 |
| S93 | (MH "Television") OR (MH "Videorecording+")                                                                                                                                                                                                    | Search modes - Boolean/Phrase | Interface - EBSCOhost Research Databases Search Screen - Advanced Search Database - CINAHL Plus with Full Text | 43,241 |
| S92 | TI ( telephon* or (tele W0 phon*) or phone or phoned or phones or phoning or "answering service" or "answering services" or telefacsimile* or "tele-facsimile" or "tele-                                                                       | Search modes - Boolean/Phrase | Interface - EBSCOhost Research Databases                                                                       | 46,130 |

|     |                                                                                                                                                                                                                      |                               |                                                                                                                |        |
|-----|----------------------------------------------------------------------------------------------------------------------------------------------------------------------------------------------------------------------|-------------------------------|----------------------------------------------------------------------------------------------------------------|--------|
|     | facsimiles" or FAX ) OR AB ( telephon* or (tele W0 phon*) or phone or phoned or phones or phoning or "answering service" or "answering services" or telefacsimile* or "tele-facsimile" or "tele-facsimiles" or FAX ) |                               | Search Screen - Advanced Search Database - CINAHL Plus with Full Text                                          |        |
| S91 | (MH "Telephone+")                                                                                                                                                                                                    | Search modes - Boolean/Phrase | Interface - EBSCOhost Research Databases Search Screen - Advanced Search Database - CINAHL Plus with Full Text | 25,218 |
| S90 | TI ( (electronic W0 mail*) or email* or (e W0 mail*) ) OR AB ( (electronic W0 mail*) or email* or (e W0 mail*) )                                                                                                     | Search modes - Boolean/Phrase | Interface - EBSCOhost Research Databases Search Screen - Advanced Search Database - CINAHL Plus with Full Text | 11,502 |
| S89 | (MH "Email")                                                                                                                                                                                                         | Search modes - Boolean/Phrase | Interface - EBSCOhost Research Databases Search Screen - Advanced Search Database - CINAHL Plus with Full Text | 6,941  |

|     |                                                                                                                                                                                                                    |                               |                                                                                                                |       |
|-----|--------------------------------------------------------------------------------------------------------------------------------------------------------------------------------------------------------------------|-------------------------------|----------------------------------------------------------------------------------------------------------------|-------|
| S88 | TI ( "health portal" or "health portals" ) OR AB ( "health portal" or "health portals" )                                                                                                                           | Search modes - Boolean/Phrase | Interface - EBSCOhost Research Databases Search Screen - Advanced Search Database - CINAHL Plus with Full Text | 84    |
| S87 | TI ( "health data" or "medical data" or "clinical data" ) N3 (portal or portals) ) OR AB ( "health data" or "medical data" or "clinical data" ) N3 (portal or portals) )                                           | Search modes - Boolean/Phrase | Interface - EBSCOhost Research Databases Search Screen - Advanced Search Database - CINAHL Plus with Full Text | 14    |
| S86 | TI ( "health information" or "medical information" or "clinical information" ) N3 (portal or portals) ) OR AB ( "health information" or "medical information" or "clinical information" ) N3 (portal or portals) ) | Search modes - Boolean/Phrase | Interface - EBSCOhost Research Databases Search Screen - Advanced Search Database - CINAHL Plus with Full Text | 67    |
| S85 | TI ( patient# N2 (portal or portals) ) OR AB ( patient# N2 (portal or portals) )                                                                                                                                   | Search modes - Boolean/Phrase | Interface - EBSCOhost Research Databases Search Screen - Advanced Search Database - CINAHL Plus                | 1,431 |

|     |                                                                                                                                                                                                                                                                                                                           |                               |                                                                                                                |       |
|-----|---------------------------------------------------------------------------------------------------------------------------------------------------------------------------------------------------------------------------------------------------------------------------------------------------------------------------|-------------------------------|----------------------------------------------------------------------------------------------------------------|-------|
|     |                                                                                                                                                                                                                                                                                                                           |                               | with Full Text                                                                                                 |       |
| S84 | (MH "Patient Portals")                                                                                                                                                                                                                                                                                                    | Search modes - Boolean/Phrase | Interface - EBSCOhost Research Databases Search Screen - Advanced Search Database - CINAHL Plus with Full Text | 88    |
| S83 | TI ( virtual* N3 (care or healthcare or "health care" or interven* or consult* or counsel* or monitor* or psychiatr* or rehab* or treat* or therap*) ) OR AB ( virtual* N3 (care or healthcare or "health care" or interven* or consult* or counsel* or monitor* or psychiatr* or rehab* or treat* or therap*) )          | Search modes - Boolean/Phrase | Interface - EBSCOhost Research Databases Search Screen - Advanced Search Database - CINAHL Plus with Full Text | 2,160 |
| S82 | TI ( video* N3 (care or healthcare or "health care" or interven* or consult* or counsel* or monitor* or psychiatr* or rehab* or treat* or therap*) ) OR AB ( video* N3 (care or healthcare or "health care" or interven* or consult* or counsel* or monitor* or psychiatr* or rehab* or treat* or therap*) )              | Search modes - Boolean/Phrase | Interface - EBSCOhost Research Databases Search Screen - Advanced Search Database - CINAHL Plus with Full Text | 4,419 |
| S81 | TI ( "technology-based" or "technology-facilitated") N3 (care or healthcare or "health care" or interven* or consult* or counsel* or monitor* or psychiatr* or rehab* or treat* or therap*) ) OR AB ( "technology-based" or "technology-facilitated") N3 (care or healthcare or "health care" or interven* or consult* or | Search modes - Boolean/Phrase | Interface - EBSCOhost Research Databases Search Screen - Advanced                                              | 461   |



|     |                                                                                                                                                                                                                                                                                                                                                                                                                                                                                                    |                               |                                                                                                                |       |
|-----|----------------------------------------------------------------------------------------------------------------------------------------------------------------------------------------------------------------------------------------------------------------------------------------------------------------------------------------------------------------------------------------------------------------------------------------------------------------------------------------------------|-------------------------------|----------------------------------------------------------------------------------------------------------------|-------|
|     | counsel* or monitor* or psychiatr* or rehab* or treat* or therap* )                                                                                                                                                                                                                                                                                                                                                                                                                                |                               | Search Database - CINAHL Plus with Full Text                                                                   |       |
| S80 | TI ( digital* N3 (care or healthcare or "health care" or interven* or consult* or counsel* or monitor* or psychiatr* or rehab* or treat* or therap* ) OR AB ( digital* N3 (care or healthcare or "health care" or interven* or consult* or counsel* or monitor* or psychiatr* or rehab* or treat* or therap* ) )                                                                                                                                                                                   | Search modes - Boolean/Phrase | Interface - EBSCOhost Research Databases Search Screen - Advanced Search Database - CINAHL Plus with Full Text | 2,177 |
| S79 | TI ( mobile N3 (app or apps or application#) ) OR AB ( mobile N3 (app or apps or application#) )                                                                                                                                                                                                                                                                                                                                                                                                   | Search modes - Boolean/Phrase | Interface - EBSCOhost Research Databases Search Screen - Advanced Search Database - CINAHL Plus with Full Text | 4,366 |
| S78 | TI ( (internet* or online or web or "web-based" or "web-site" or website or www or cyber* or smartphone* or (smart W0 phone*) or iphone* or "i-phone" or "i-phones" or ipad or "i-pad" or ipads or "i-pads") N3 (app or apps or application#) ) OR AB ( (internet* or online or web or "web-based" or "web-site" or website or www or cyber* or smartphone* or (smart W0 phone*) or iphone* or "i-phone" or "i-phones" or ipad or "i-pad" or ipads or "i-pads") N3 (app or apps or application#) ) | Search modes - Boolean/Phrase | Interface - EBSCOhost Research Databases Search Screen - Advanced Search Database - CINAHL Plus with Full Text | 5,284 |
| S77 | (MH "Smartphone")                                                                                                                                                                                                                                                                                                                                                                                                                                                                                  | Search modes - Boolean/Phrase | Interface - EBSCOhost Research Databases                                                                       | 2,732 |

|     |                                                                                                                                                                                                                                                                                                                                                                                                                                                                                                                                                                                                                                                                                                                                                                 |                               |                                                                                                                |         |
|-----|-----------------------------------------------------------------------------------------------------------------------------------------------------------------------------------------------------------------------------------------------------------------------------------------------------------------------------------------------------------------------------------------------------------------------------------------------------------------------------------------------------------------------------------------------------------------------------------------------------------------------------------------------------------------------------------------------------------------------------------------------------------------|-------------------------------|----------------------------------------------------------------------------------------------------------------|---------|
|     |                                                                                                                                                                                                                                                                                                                                                                                                                                                                                                                                                                                                                                                                                                                                                                 |                               | Search Screen - Advanced Search Database - CINAHL Plus with Full Text                                          |         |
| S76 | TI ( (internet* or online or web or "web-based" or "web-site" or website or www or cyber* or smartphone* or (smart W0 phone*) or iphone* or "i-phone" or "i-phones" or ipad or "i-pad" or ipads or "i-pads") N3 (care or deliver* or healthcare or "health care" or consult* or counsel* or interven* or monitor* or psychiatr* or rehab* or service# or treat* or therap*) ) OR AB ( (internet* or online or web or "web-based" or "web-site" or website or www or cyber* or smartphone* or (smart W0 phone*) or iphone* or "i-phone" or "i-phones" or ipad or "i-pad" or ipads or "i-pads") N3 (care or deliver* or healthcare or "health care" or consult* or counsel* or interven* or monitor* or psychiatr* or rehab* or service# or treat* or therap*) ). | Search modes - Boolean/Phrase | Interface - EBSCOhost Research Databases Search Screen - Advanced Search Database - CINAHL Plus with Full Text | 16,618  |
| S75 | (MH "Internet") OR (MH "World Wide Web+")                                                                                                                                                                                                                                                                                                                                                                                                                                                                                                                                                                                                                                                                                                                       | Search modes - Boolean/Phrase | Interface - EBSCOhost Research Databases Search Screen - Advanced Search Database - CINAHL Plus with Full Text | 142,133 |
| S74 | (MH "Electronic Bulletin Boards+")                                                                                                                                                                                                                                                                                                                                                                                                                                                                                                                                                                                                                                                                                                                              | Search modes - Boolean/Phrase | Interface - EBSCOhost Research Databases Search Screen - Advanced Search Database - CINAHL Plus                | 427     |

|     |                                                                                                                                                                                                         |                               |                                                                                                                |         |
|-----|---------------------------------------------------------------------------------------------------------------------------------------------------------------------------------------------------------|-------------------------------|----------------------------------------------------------------------------------------------------------------|---------|
|     |                                                                                                                                                                                                         |                               | with Full Text                                                                                                 |         |
| S73 | (MH "Computer Communication Networks") OR (MH "Local Area Networks+") OR (MH "Wide Area Networks")                                                                                                      | Search modes - Boolean/Phrase | Interface - EBSCOhost Research Databases Search Screen - Advanced Search Database - CINAHL Plus with Full Text | 3,610   |
| S72 | S41 AND S71                                                                                                                                                                                             | Search modes - Boolean/Phrase | Interface - EBSCOhost Research Databases Search Screen - Advanced Search Database - CINAHL Plus with Full Text | 83,256  |
| S71 | S42 OR S43 OR S44 OR S45 OR S46 OR S47 OR S48 OR S49 OR S50 OR S51 OR S52 OR S53 OR S54 OR S55 OR S56 OR S57 OR S58 OR S59 OR S60 OR S61 OR S62 OR S63 OR S64 OR S65 OR S66 OR S67 OR S68 OR S69 OR S70 | Search modes - Boolean/Phrase | Interface - EBSCOhost Research Databases Search Screen - Advanced Search Database - CINAHL Plus with Full Text | 347,716 |
| S70 | TI ( neuros?s N3 (trauma* or posttrauma* or post-trauma* ) ) OR AB ( neuros?s N3 (trauma* or posttrauma* or post-trauma* ) )                                                                            | Search modes - Boolean/Phrase | Interface - EBSCOhost Research Databases Search Screen - Advanced                                              | 13      |

|     |                                                                                                                                                                                          |                               |                                                                                                                |        |
|-----|------------------------------------------------------------------------------------------------------------------------------------------------------------------------------------------|-------------------------------|----------------------------------------------------------------------------------------------------------------|--------|
|     |                                                                                                                                                                                          |                               | Search Database - CINAHL Plus with Full Text                                                                   |        |
| S69 | TI ( "stress disorder" or "stress disorders") N3 (trauma* or posttrauma* or post-trauma* ) OR AB ( "stress disorder" or "stress disorders") N3 (trauma* or posttrauma* or post-trauma* ) | Search modes - Boolean/Phrase | Interface - EBSCOhost Research Databases Search Screen - Advanced Search Database - CINAHL Plus with Full Text | 14,699 |
| S68 | TI PTSD OR AB PTSD                                                                                                                                                                       | Search modes - Boolean/Phrase | Interface - EBSCOhost Research Databases Search Screen - Advanced Search Database - CINAHL Plus with Full Text | 12,171 |
| S67 | TI ( MDD and mental ) OR AB ( MDD and mental )                                                                                                                                           | Search modes - Boolean/Phrase | Interface - EBSCOhost Research Databases Search Screen - Advanced Search Database - CINAHL Plus with Full Text | 710    |
| S66 | TI ( (feel* W0 blue) or blues ) OR AB ( (feel* W0 blue) or blues )                                                                                                                       | Search modes - Boolean/Phrase | Interface - EBSCOhost Research Databases                                                                       | 9,818  |

|     |                                                                                                                     |                                  |                                                                                                                                                 |         |
|-----|---------------------------------------------------------------------------------------------------------------------|----------------------------------|-------------------------------------------------------------------------------------------------------------------------------------------------|---------|
|     |                                                                                                                     |                                  | Search<br>Screen -<br>Advanced<br>Search<br>Database -<br>CINAHL Plus<br>with Full<br>Text                                                      |         |
| S65 | TI ( depress* or dysthym* or melanchol* ) OR<br>AB ( depress* or dysthym* or melanchol* )                           | Search modes -<br>Boolean/Phrase | Interface -<br>EBSCOhost<br>Research<br>Databases<br>Search<br>Screen -<br>Advanced<br>Search<br>Database -<br>CINAHL Plus<br>with Full<br>Text | 158,485 |
| S64 | MH "Depression+"                                                                                                    | Search modes -<br>Boolean/Phrase | Interface -<br>EBSCOhost<br>Research<br>Databases<br>Search<br>Screen -<br>Advanced<br>Search<br>Database -<br>CINAHL Plus<br>with Full<br>Text | 121,857 |
| S63 | TI ( hyperkinetic or "hyper-kinetic") W0<br>syndrome# ) OR AB ( hyperkinetic or "hyper-<br>kinetic") W0 syndrome# ) | Search modes -<br>Boolean/Phrase | Interface -<br>EBSCOhost<br>Research<br>Databases<br>Search<br>Screen -<br>Advanced<br>Search<br>Database -<br>CINAHL Plus<br>with Full<br>Text | 20      |

|     |                                                                                                                                        |                                  |                                                                                                                                                 |        |
|-----|----------------------------------------------------------------------------------------------------------------------------------------|----------------------------------|-------------------------------------------------------------------------------------------------------------------------------------------------|--------|
| S62 | TI ( ADDH or ADHD ) OR AB ( ADDH or ADHD )                                                                                             | Search modes -<br>Boolean/Phrase | Interface -<br>EBSCOhost<br>Research<br>Databases<br>Search<br>Screen -<br>Advanced<br>Search<br>Database -<br>CINAHL Plus<br>with Full<br>Text | 13,521 |
| S61 | TI ( "attention deficit" or "attention deficits" )<br>OR AB ( "attention deficit" or "attention<br>deficits" )                         | Search modes -<br>Boolean/Phrase | Interface -<br>EBSCOhost<br>Research<br>Databases<br>Search<br>Screen -<br>Advanced<br>Search<br>Database -<br>CINAHL Plus<br>with Full<br>Text | 8,622  |
| S60 | MH "Attention Deficit Hyperactivity Disorder"                                                                                          | Search modes -<br>Boolean/Phrase | Interface -<br>EBSCOhost<br>Research<br>Databases<br>Search<br>Screen -<br>Advanced<br>Search<br>Database -<br>CINAHL Plus<br>with Full<br>Text | 17,669 |
| S59 | TI ( catastrophi?ation# or catastrophi?e* or<br>catastrophi?ing ) OR AB ( catastrophi?ation# or<br>catastrophi?e* or catastrophi?ing ) | Search modes -<br>Boolean/Phrase | Interface -<br>EBSCOhost<br>Research<br>Databases<br>Search<br>Screen -<br>Advanced<br>Search<br>Database -<br>CINAHL Plus                      | 2,355  |

|     |                                                                                                                                                                                                                                                                                                                  |                               |                                                                                                                |       |
|-----|------------------------------------------------------------------------------------------------------------------------------------------------------------------------------------------------------------------------------------------------------------------------------------------------------------------|-------------------------------|----------------------------------------------------------------------------------------------------------------|-------|
|     |                                                                                                                                                                                                                                                                                                                  |                               | with Full Text                                                                                                 |       |
| S58 | TI ( phobia or phobias or phobic ) OR AB ( phobia or phobias or phobic )                                                                                                                                                                                                                                         | Search modes - Boolean/Phrase | Interface - EBSCOhost Research Databases Search Screen - Advanced Search Database - CINAHL Plus with Full Text | 3,144 |
| S57 | TI ( (panic W0 disorder*) or (panic N2 attack*) ) OR AB ( (panic W0 disorder*) or (panic N2 attack*) )                                                                                                                                                                                                           | Search modes - Boolean/Phrase | Interface - EBSCOhost Research Databases Search Screen - Advanced Search Database - CINAHL Plus with Full Text | 2,756 |
| S56 | TI ( "obsessive-compulsive" or (anankastic W0 personalit*) or (compulsive W0 personalit*) or (obsessive W0 personalit*) or hoarding or psychastheni* ) OR AB ( "obsessive-compulsive" or (anankastic W0 personalit*) or (compulsive W0 personalit*) or (obsessive W0 personalit*) or hoarding or psychastheni* ) | Search modes - Boolean/Phrase | Interface - EBSCOhost Research Databases Search Screen - Advanced Search Database - CINAHL Plus with Full Text | 5,730 |
| S55 | TI ( (neurotic W0 disorder*) or neuros?s or psychoneuros?s or psycho-neuros?s ) OR AB ( (neurotic W0 disorder*) or neuros?s or psychoneuros?s or psycho-neuros?s )                                                                                                                                               | Search modes - Boolean/Phrase | Interface - EBSCOhost Research Databases Search Screen - Advanced                                              | 629   |

|     |                                                                                                                                                                                                                                                                |                               |                                                                                                                |        |
|-----|----------------------------------------------------------------------------------------------------------------------------------------------------------------------------------------------------------------------------------------------------------------|-------------------------------|----------------------------------------------------------------------------------------------------------------|--------|
|     |                                                                                                                                                                                                                                                                |                               | Search Database - CINAHL Plus with Full Text                                                                   |        |
| S54 | TI ( (neurocirculatory W0 asthenia*) or (cardiac W0 neuro?s or (effort W0 syndrome*) or ("hyperkinetic heart" W0 syndrome*) ) OR AB ( (neurocirculatory W0 asthenia*) or (cardiac W0 neuro?s or (effort W0 syndrome*) or ("hyperkinetic heart" W0 syndrome*) ) | Search modes - Boolean/Phrase | Interface - EBSCOhost Research Databases Search Screen - Advanced Search Database - CINAHL Plus with Full Text | 15     |
| S53 | TI ( agoraphobi* or claustrophobi* or homophobi* or neophobi* or xenophobi* ) OR AB ( agoraphobi* or claustrophobi* or homophobi* or neophobi* or xenophobi* )                                                                                                 | Search modes - Boolean/Phrase | Interface - EBSCOhost Research Databases Search Screen - Advanced Search Database - CINAHL Plus with Full Text | 2,337  |
| S52 | TI ( (incessan* or obsessive* or persistan* or intense*) N3 fear* ) OR AB ( (incessan* or obsessive* or persistan* or intense*) N3 fear* )                                                                                                                     | Search modes - Boolean/Phrase | Interface - EBSCOhost Research Databases Search Screen - Advanced Search Database - CINAHL Plus with Full Text | 174    |
| S51 | TI ( hypervigilan* or hyper-vigilan* or nervous* ) OR AB ( hypervigilan* or hyper-vigilan* or nervous* )                                                                                                                                                       | Search modes - Boolean/Phrase | Interface - EBSCOhost Research Databases                                                                       | 30,051 |



|     |                                                                                    |                                  |                                                                                                                                                 |        |
|-----|------------------------------------------------------------------------------------|----------------------------------|-------------------------------------------------------------------------------------------------------------------------------------------------|--------|
|     |                                                                                    |                                  | Search<br>Screen -<br>Advanced<br>Search<br>Database -<br>CINAHL Plus<br>with Full<br>Text                                                      |        |
| S50 | TI GAD OR AB GAD                                                                   | Search modes -<br>Boolean/Phrase | Interface -<br>EBSCOhost<br>Research<br>Databases<br>Search<br>Screen -<br>Advanced<br>Search<br>Database -<br>CINAHL Plus<br>with Full<br>Text | 1,627  |
| S49 | TI ( anxiety or anxieties or anxious* ) OR AB ( anxiety or anxieties or anxious* ) | Search modes -<br>Boolean/Phrase | Interface -<br>EBSCOhost<br>Research<br>Databases<br>Search<br>Screen -<br>Advanced<br>Search<br>Database -<br>CINAHL Plus<br>with Full<br>Text | 87,663 |
| S48 | MH "Anxiety+"                                                                      | Search modes -<br>Boolean/Phrase | Interface -<br>EBSCOhost<br>Research<br>Databases<br>Search<br>Screen -<br>Advanced<br>Search<br>Database -<br>CINAHL Plus<br>with Full<br>Text | 49,349 |

|     |                                                                                                                                                 |                                  |                                                                                                                                                 |        |
|-----|-------------------------------------------------------------------------------------------------------------------------------------------------|----------------------------------|-------------------------------------------------------------------------------------------------------------------------------------------------|--------|
| S47 | MH "Anxiety Disorders+"                                                                                                                         | Search modes -<br>Boolean/Phrase | Interface -<br>EBSCOhost<br>Research<br>Databases<br>Search<br>Screen -<br>Advanced<br>Search<br>Database -<br>CINAHL Plus<br>with Full<br>Text | 49,095 |
| S46 | TI ( (cyclothymic or "cyclo-thymic") W0<br>(disorder# or personalit*) ) OR AB ( (cyclothymic or "cyclo-thymic") W0 (disorder# or personalit*) ) | Search modes -<br>Boolean/Phrase | Interface -<br>EBSCOhost<br>Research<br>Databases<br>Search<br>Screen -<br>Advanced<br>Search<br>Database -<br>CINAHL Plus<br>with Full<br>Text | 27     |
| S45 | MH "Cyclothymic Disorder"                                                                                                                       | Search modes -<br>Boolean/Phrase | Interface -<br>EBSCOhost<br>Research<br>Databases<br>Search<br>Screen -<br>Advanced<br>Search<br>Database -<br>CINAHL Plus<br>with Full<br>Text | 181    |
| S44 | TI ( (affective or mood) W0 disorder# ) OR AB ( (affective or mood) W0 disorder# )                                                              | Search modes -<br>Boolean/Phrase | Interface -<br>EBSCOhost<br>Research<br>Databases<br>Search<br>Screen -<br>Advanced<br>Search<br>Database -<br>CINAHL Plus                      | 8,199  |

|     |                                                                                                                                                                                                                                                                                               |                               |                                                                                                                |           |
|-----|-----------------------------------------------------------------------------------------------------------------------------------------------------------------------------------------------------------------------------------------------------------------------------------------------|-------------------------------|----------------------------------------------------------------------------------------------------------------|-----------|
|     |                                                                                                                                                                                                                                                                                               |                               | with Full Text                                                                                                 |           |
| S43 | MH "Affective Disorders+"                                                                                                                                                                                                                                                                     | Search modes - Boolean/Phrase | Interface - EBSCOhost Research Databases Search Screen - Advanced Search Database - CINAHL Plus with Full Text | 128,800   |
| S42 | TI ( (emotional* or mental* or psychological* or social*) N2 health* N3 (disorder* or morbidit* or comorbid* or co-morbidit* or problem*) )<br>OR AB ( (emotional* or mental* or psychological* or social*) N2 health* N3 (disorder* or morbidit* or comorbid* or co-morbidit* or problem*) ) | Search modes - Boolean/Phrase | Interface - EBSCOhost Research Databases Search Screen - Advanced Search Database - CINAHL Plus with Full Text | 18,400    |
| S41 | S3 OR S40                                                                                                                                                                                                                                                                                     | Search modes - Boolean/Phrase | Interface - EBSCOhost Research Databases Search Screen - Advanced Search Database - CINAHL Plus with Full Text | 1,920,672 |
| S40 | S4 OR S5 OR S6 OR S7 OR S8 OR S9 OR S10 OR S11 OR S12 OR S13 OR S14 OR S15 OR S16 OR S17 OR S18 OR S19 OR S20 OR S21 OR S22 OR S23 OR S24 OR S25 OR S26 OR S27 OR S28 OR S29 OR S30 OR S31 OR S32 OR S33 OR S34 OR S35 OR S36 OR S37 OR S38 OR S39                                            | Search modes - Boolean/Phrase | Interface - EBSCOhost Research Databases Search Screen - Advanced                                              | 1,836,239 |

|     |                                                                                                                                                                                      |                               |                                                                                                                |         |
|-----|--------------------------------------------------------------------------------------------------------------------------------------------------------------------------------------|-------------------------------|----------------------------------------------------------------------------------------------------------------|---------|
|     |                                                                                                                                                                                      |                               | Search Database - CINAHL Plus with Full Text                                                                   |         |
| S39 | TI ( (elevated or high*) N2 blood pressure* ) OR AB ( (elevated or high*) N2 blood pressure* )                                                                                       | Search modes - Boolean/Phrase | Interface - EBSCOhost Research Databases Search Screen - Advanced Search Database - CINAHL Plus with Full Text | 10,361  |
| S38 | TI hypertens* OR AB hypertens*                                                                                                                                                       | Search modes - Boolean/Phrase | Interface - EBSCOhost Research Databases Search Screen - Advanced Search Database - CINAHL Plus with Full Text | 93,958  |
| S37 | TI ( arterioscleros* or arterio-scleros* or atheroscleros* or athero-scleros* ) OR AB ( arterioscleros* or arterio-scleros* or atheroscleros* or athero-scleros* )                   | Search modes - Boolean/Phrase | Interface - EBSCOhost Research Databases Search Screen - Advanced Search Database - CINAHL Plus with Full Text | 18,802  |
| S36 | TI ( (artery or arteries or arterial or atrial* or atrium* or cardiac* or cardio* or cardiovascul* or cardio-vascul* or coronary or heart* or myocard* or ventricle*) N3 (arrest* or | Search modes - Boolean/Phrase | Interface - EBSCOhost Research Databases                                                                       | 291,187 |

|     |                                                                                                                                                                                                                                                                                                                                                                                                                                                                                                                                                                                                                                                                                                                                                   |                               |                                                                                                                |         |
|-----|---------------------------------------------------------------------------------------------------------------------------------------------------------------------------------------------------------------------------------------------------------------------------------------------------------------------------------------------------------------------------------------------------------------------------------------------------------------------------------------------------------------------------------------------------------------------------------------------------------------------------------------------------------------------------------------------------------------------------------------------------|-------------------------------|----------------------------------------------------------------------------------------------------------------|---------|
|     | aneurysm* or arrhythmia* or arrhythmia* or disease* or disorder* or dysrhythmia* or dysrhythmia* or dysfunction* or failure* or fibrillation* or ischemi* or infarction* or obstruct* or occlu* or rupture* or stenosis or syndrom* or thrombo* or vasospas* or vasospas* ) OR AB ( (artery or arteries or arterial or atrial* or atrium* or cardiac* or cardio* or cardiovascul* or cardio-vascul* or coronary or heart* or myocard* or ventricle*) N3 (arrest* or aneurysm* or arrhythmia* or arrhythmia* or disease* or disorder* or dysrhythmia* or dysrhythmia* or dysfunction* or failure* or fibrillation* or ischemi* or infarction* or obstruct* or occlu* or rupture* or stenosis or syndrom* or thrombo* or vasospas* or vasospas* ) ) |                               | Search Screen - Advanced Search Database - CINAHL Plus with Full Text                                          |         |
| S35 | MH "Cardiovascular Diseases+"                                                                                                                                                                                                                                                                                                                                                                                                                                                                                                                                                                                                                                                                                                                     | Search modes - Boolean/Phrase | Interface - EBSCOhost Research Databases Search Screen - Advanced Search Database - CINAHL Plus with Full Text | 616,463 |
| S34 | TI ( COPD or COAD ) OR AB ( COPD or COAD )                                                                                                                                                                                                                                                                                                                                                                                                                                                                                                                                                                                                                                                                                                        | Search modes - Boolean/Phrase | Interface - EBSCOhost Research Databases Search Screen - Advanced Search Database - CINAHL Plus with Full Text | 17,097  |
| S33 | TI ( emphysema# N3 (pulmonary or airway* or air way* or lung or lungs or airflow* or air flow* or centriacinar or "centri-acinar" or centrilobular or "centri-lobular" or panacinar or "pan-acinar" or panlobular or "pan-lobular" ) )                                                                                                                                                                                                                                                                                                                                                                                                                                                                                                            | Search modes - Boolean/Phrase | Interface - EBSCOhost Research Databases Search                                                                | 1,209   |

|     |                                                                                                                                                                                                                                                                                                                                            |                               |                                                                                                                |        |
|-----|--------------------------------------------------------------------------------------------------------------------------------------------------------------------------------------------------------------------------------------------------------------------------------------------------------------------------------------------|-------------------------------|----------------------------------------------------------------------------------------------------------------|--------|
|     | OR AB ( emphysema# N3 (pulmonary or airway* or air way* or lung or lungs or airflow* or air flow* or centriacinar or "centri-acinar" or centrilobular or "centri-lobular" or panacinar or "pan-acinar" or panlobular or "pan-lobular" ) )                                                                                                  |                               | Screen - Advanced Search Database - CINAHL Plus with Full Text                                                 |        |
| S32 | TI ( chronic N2 obstructi* N3 (pulmonary or airway* or air way* or lung or lungs or airflow* or air flow* or bronchitis or bronchopulmonar* or broncho-pulmonar* ) OR AB ( chronic N2 obstructi* N3 (pulmonary or airway* or air way* or lung or lungs or airflow* or air flow* or bronchitis or bronchopulmonar* or broncho-pulmonar* ) ) | Search modes - Boolean/Phrase | Interface - EBSCOhost Research Databases Search Screen - Advanced Search Database - CINAHL Plus with Full Text | 17,432 |
| S31 | MH "Pulmonary Disease, Chronic Obstructive+"                                                                                                                                                                                                                                                                                               | Search modes - Boolean/Phrase | Interface - EBSCOhost Research Databases Search Screen - Advanced Search Database - CINAHL Plus with Full Text | 21,169 |
| S30 | TI "colitis gravis" OR AB "colitis gravis"                                                                                                                                                                                                                                                                                                 | Search modes - Boolean/Phrase | Interface - EBSCOhost Research Databases Search Screen - Advanced Search Database - CINAHL Plus with Full Text | 0      |

|     |                                                                                                                       |                               |                                                                                                                |    |
|-----|-----------------------------------------------------------------------------------------------------------------------|-------------------------------|----------------------------------------------------------------------------------------------------------------|----|
| S29 | TI ( c(proctocolitis or "procto-colitis") N2 idiopathic ) OR AB ( (proctocolitis or "procto-colitis") N2 idiopathic ) | Search modes - Boolean/Phrase | Interface - EBSCOhost Research Databases Search Screen - Advanced Search Database - CINAHL Plus with Full Text | 0  |
| S28 | TI ( (proctocolitis or "procto-colitis") N2 idiopathic ) OR AB ( (proctocolitis or "procto-colitis") N2 idiopathic )  | Search modes - Boolean/Phrase | Interface - EBSCOhost Research Databases Search Screen - Advanced Search Database - CINAHL Plus with Full Text | 0  |
| S27 | TI ( Ileocolitis or "ileo-colitis" ) OR AB ( Ileocolitis or "ileo-colitis" )                                          | Search modes - Boolean/Phrase | Interface - EBSCOhost Research Databases Search Screen - Advanced Search Database - CINAHL Plus with Full Text | 27 |
| S26 | TI ( ileitis N2 (regional or terminal) ) OR AB ( ileitis N2 (regional or terminal) )                                  | Search modes - Boolean/Phrase | Interface - EBSCOhost Research Databases Search Screen - Advanced Search Database - CINAHL Plus                | 38 |

|     |                                                                              |                               |                                                                                                                |        |
|-----|------------------------------------------------------------------------------|-------------------------------|----------------------------------------------------------------------------------------------------------------|--------|
|     |                                                                              |                               | with Full Text                                                                                                 |        |
| S25 | TI ( Crohn or "Crohn's" ) OR AB ( Crohn or "Crohn's" )                       | Search modes - Boolean/Phrase | Interface - EBSCOhost Research Databases Search Screen - Advanced Search Database - CINAHL Plus with Full Text | 7,360  |
| S24 | TI IBD OR AB IBD                                                             | Search modes - Boolean/Phrase | Interface - EBSCOhost Research Databases Search Screen - Advanced Search Database - CINAHL Plus with Full Text | 4,539  |
| S23 | TI ( inflam* N1 (bowel* or colon* ) OR AB ( inflam* N1 (bowel* or colon* ) ) | Search modes - Boolean/Phrase | Interface - EBSCOhost Research Databases Search Screen - Advanced Search Database - CINAHL Plus with Full Text | 9,032  |
| S22 | MH "Inflammatory Bowel Diseases+"                                            | Search modes - Boolean/Phrase | Interface - EBSCOhost Research Databases Search Screen - Advanced                                              | 15,541 |



|     |                                                                                                                                                                                                                                                                                                                                                                                                                                                                                                                                      |                               |                                                                                                                |        |
|-----|--------------------------------------------------------------------------------------------------------------------------------------------------------------------------------------------------------------------------------------------------------------------------------------------------------------------------------------------------------------------------------------------------------------------------------------------------------------------------------------------------------------------------------------|-------------------------------|----------------------------------------------------------------------------------------------------------------|--------|
|     |                                                                                                                                                                                                                                                                                                                                                                                                                                                                                                                                      |                               | Search Database - CINAHL Plus with Full Text                                                                   |        |
| S21 | TI ( dyslipidemi* or dyslipoproteinemi* or dyslipo-proteinemi* or hyperlipemi* or hyperlipid#emi* or hyper-lipemi* or hyper-lipid#emi* or lipemi* or lipid#emi* or hypercholester#emi* or hypercholester#emi* or hypertriglyceridemi* or hyper-triglyceridemi* ) OR AB ( dyslipidemi* or dyslipoproteinemi* or dyslipo-proteinemi* or hyperlipemi* or hyperlipid#emi* or hyper-lipemi* or hyper-lipid#emi* or lipemi* or lipid#emi* or hypercholester#emi* or hypercholester#emi* or hypertriglyceridemi* or hyper-triglyceridemi* ) | Search modes - Boolean/Phrase | Interface - EBSCOhost Research Databases Search Screen - Advanced Search Database - CINAHL Plus with Full Text | 15,450 |
| S20 | MH "Hyperlipidemia+"                                                                                                                                                                                                                                                                                                                                                                                                                                                                                                                 | Search modes - Boolean/Phrase | Interface - EBSCOhost Research Databases Search Screen - Advanced Search Database - CINAHL Plus with Full Text | 21,692 |
| S19 | TI ( IDDM or NIDDM ) OR AB ( IDDM or NIDDM )                                                                                                                                                                                                                                                                                                                                                                                                                                                                                         | Search modes - Boolean/Phrase | Interface - EBSCOhost Research Databases Search Screen - Advanced Search Database - CINAHL Plus with Full Text | 2,337  |
| S18 | TI ( ("Type 1" or "Type I" or "Type 2" or "Type II" or ID or NID) W0 DM ) ) OR AB ( ("Type 1" or                                                                                                                                                                                                                                                                                                                                                                                                                                     | Search modes - Boolean/Phrase | Interface - EBSCOhost Research                                                                                 | 1,064  |

|     |                                                                                                        |                                  |                                                                                                                                                 |         |
|-----|--------------------------------------------------------------------------------------------------------|----------------------------------|-------------------------------------------------------------------------------------------------------------------------------------------------|---------|
|     | "Type I" or "Type 2" or "Type II" or ID or NID)<br>W0 DM ) )                                           |                                  | Databases<br>Search<br>Screen -<br>Advanced<br>Search<br>Database -<br>CINAHL Plus<br>with Full<br>Text                                         |         |
| S17 | TI diabet* OR AB diabet*                                                                               | Search modes -<br>Boolean/Phrase | Interface -<br>EBSCOhost<br>Research<br>Databases<br>Search<br>Screen -<br>Advanced<br>Search<br>Database -<br>CINAHL Plus<br>with Full<br>Text | 207,171 |
| S16 | (MH "Diabetes Mellitus") OR (MH "Diabetes<br>Mellitus, Type 1") OR (MH "Diabetes Mellitus,<br>Type 2") | Search modes -<br>Boolean/Phrase | Interface -<br>EBSCOhost<br>Research<br>Databases<br>Search<br>Screen -<br>Advanced<br>Search<br>Database -<br>CINAHL Plus<br>with Full<br>Text | 148,760 |
| S15 | TI ( CKD or CKDs ) OR AB ( CKD or CKDs )                                                               | Search modes -<br>Boolean/Phrase | Interface -<br>EBSCOhost<br>Research<br>Databases<br>Search<br>Screen -<br>Advanced<br>Search<br>Database -<br>CINAHL Plus<br>with Full<br>Text | 9,008   |

|     |                                                                                                                                                                                                                                                                                                                                                                                                                                                                                                                                                                |                               |                                                                                                                |         |
|-----|----------------------------------------------------------------------------------------------------------------------------------------------------------------------------------------------------------------------------------------------------------------------------------------------------------------------------------------------------------------------------------------------------------------------------------------------------------------------------------------------------------------------------------------------------------------|-------------------------------|----------------------------------------------------------------------------------------------------------------|---------|
| S14 | TI ( chronic N2 (renal or kidney*) N3 (condition* or disease* or disorder* or fail* or insufficien*) ) OR AB ( chronic N2 (renal or kidney*) N3 (condition* or disease* or disorder* or fail* or insufficien*) )                                                                                                                                                                                                                                                                                                                                               | Search modes - Boolean/Phrase | Interface - EBSCOhost Research Databases Search Screen - Advanced Search Database - CINAHL Plus with Full Text | 20,525  |
| S13 | MH "Renal Insufficiency, Chronic"                                                                                                                                                                                                                                                                                                                                                                                                                                                                                                                              | Search modes - Boolean/Phrase | Interface - EBSCOhost Research Databases Search Screen - Advanced Search Database - CINAHL Plus with Full Text | 28,632  |
| S12 | TI ( adenoma* or adenocarcinoma* or adeno-carcinoma* or blastoma* or carcinosarcoma* or carcino-sarcoma* or hematoma* or hepatoblastoma* or hepato-blastoma* or leukemia* or leukaemia* or lymphoma* or melanoma* or mesenchymoma* or mesothelioma* or sarcoma* or thymoma* ) OR AB ( adenoma* or adenocarcinoma* or adeno-carcinoma* or blastoma* or carcinosarcoma* or carcino-sarcoma* or hematoma* or hepatoblastoma* or hepato-blastoma* or leukemia* or leukaemia* or lymphoma* or melanoma* or mesenchymoma* or mesothelioma* or sarcoma* or thymoma* ) | Search modes - Boolean/Phrase | Interface - EBSCOhost Research Databases Search Screen - Advanced Search Database - CINAHL Plus with Full Text | 56,415  |
| S11 | TI ( neoplas* or cancer* or tumour* or tumor* or carcinoma* or malignan* or metasta* or oncolog* ) OR AB ( neoplas* or cancer* or tumour* or tumor* or carcinoma* or malignan* or metasta* or oncolog* )                                                                                                                                                                                                                                                                                                                                                       | Search modes - Boolean/Phrase | Interface - EBSCOhost Research Databases Search Screen - Advanced Search                                       | 601,907 |

|     |                                                                                                                                                                                                                                                                                                                                                                                                                                                                                                                                                                                                                                                                                                                                                                                                                      |                               |                                                                                                                |         |
|-----|----------------------------------------------------------------------------------------------------------------------------------------------------------------------------------------------------------------------------------------------------------------------------------------------------------------------------------------------------------------------------------------------------------------------------------------------------------------------------------------------------------------------------------------------------------------------------------------------------------------------------------------------------------------------------------------------------------------------------------------------------------------------------------------------------------------------|-------------------------------|----------------------------------------------------------------------------------------------------------------|---------|
|     |                                                                                                                                                                                                                                                                                                                                                                                                                                                                                                                                                                                                                                                                                                                                                                                                                      |                               | Database - CINAHL Plus with Full Text                                                                          |         |
| S10 | MH "Neoplasms+"                                                                                                                                                                                                                                                                                                                                                                                                                                                                                                                                                                                                                                                                                                                                                                                                      | Search modes - Boolean/Phrase | Interface - EBSCOhost Research Databases Search Screen - Advanced Search Database - CINAHL Plus with Full Text | 571,926 |
| S9  | TI ( (chronic* or constant* or continual* or continuous* or ceaseless* or endless* or incessant* or interminabl* or intractable or longterm or "long-term" or nonstop* or non-stop* or perpetual* or persist* or recur* or refractory or sustained or relentless* or unabat* or unceasing or unending or uninterrupt* or unrelenting or unrelieved or unremitt*) N3 (neuralgi* or neuropath* or pain*) ) OR AB ( (chronic* or constant* or continual* or continuous* or ceaseless* or endless* or incessant* or interminabl* or intractable or longterm or "long-term" or nonstop* or non-stop* or perpetual* or persist* or recur* or refractory or sustained or relentless* or unabat* or unceasing or unending or uninterrupt* or unrelenting or unrelieved or unremitt*) N3 (neuralgi* or neuropath* or pain*) ) | Search modes - Boolean/Phrase | Interface - EBSCOhost Research Databases Search Screen - Advanced Search Database - CINAHL Plus with Full Text | 46,734  |
| S8  | (MH "Chronic Pain")                                                                                                                                                                                                                                                                                                                                                                                                                                                                                                                                                                                                                                                                                                                                                                                                  | Search modes - Boolean/Phrase | Interface - EBSCOhost Research Databases Search Screen - Advanced Search Database - CINAHL Plus                | 23,373  |

|    |                                                                                                                                                                                                                                                                                                                                                                            |                               |                                                                                                                |        |
|----|----------------------------------------------------------------------------------------------------------------------------------------------------------------------------------------------------------------------------------------------------------------------------------------------------------------------------------------------------------------------------|-------------------------------|----------------------------------------------------------------------------------------------------------------|--------|
|    |                                                                                                                                                                                                                                                                                                                                                                            |                               | with Full Text                                                                                                 |        |
| S7 | TI asthma* OR AB asthma*                                                                                                                                                                                                                                                                                                                                                   | Search modes - Boolean/Phrase | Interface - EBSCOhost Research Databases Search Screen - Advanced Search Database - CINAHL Plus with Full Text | 39,408 |
| S6 | (MH "Asthma+")                                                                                                                                                                                                                                                                                                                                                             | Search modes - Boolean/Phrase | Interface - EBSCOhost Research Databases Search Screen - Advanced Search Database - CINAHL Plus with Full Text | 36,911 |
| S5 | TI ( arthriti* or arthros?s or osteoarthriti* or osteo-arthriti* or osteoarthros?s or osteo-arthros?s or polyarthriti* or poly-arthriti* or spondylarthriti* or spondyl-arthriti* ) OR AB ( arthriti* or arthros?s or osteoarthriti* or osteo-arthriti* or osteoarthros?s or osteo-arthros?s or polyarthriti* or poly-arthriti* or spondylarthriti* or spondyl-arthriti* ) | Search modes - Boolean/Phrase | Interface - EBSCOhost Research Databases Search Screen - Advanced Search Database - CINAHL Plus with Full Text | 72,634 |
| S4 | (MH "Arthritis+")                                                                                                                                                                                                                                                                                                                                                          | Search modes - Boolean/Phrase | Interface - EBSCOhost Research Databases Search Screen - Advanced                                              | 78,840 |

|    |                                                                                                                                                                                                                                                                                                                                                                                                                                                                                                                    |                               |                                                                                                                |         |
|----|--------------------------------------------------------------------------------------------------------------------------------------------------------------------------------------------------------------------------------------------------------------------------------------------------------------------------------------------------------------------------------------------------------------------------------------------------------------------------------------------------------------------|-------------------------------|----------------------------------------------------------------------------------------------------------------|---------|
|    |                                                                                                                                                                                                                                                                                                                                                                                                                                                                                                                    |                               | Search Database - CINAHL Plus with Full Text                                                                   |         |
| S3 | S1 OR S2                                                                                                                                                                                                                                                                                                                                                                                                                                                                                                           | Search modes - Boolean/Phrase | Interface - EBSCOhost Research Databases Search Screen - Advanced Search Database - CINAHL Plus with Full Text | 180,624 |
| S2 | TI ( (chronic* or longterm or "long-term" or longstanding or "long-standing" or ongoing or persisten*) N2 (comorbid* or (co W0 morbid*) or condition* or disabilit* or disease* or disorder* or ill or illness* or morbidit* or syndrom* or symptom*) ) OR AB ( (chronic* or longterm or "long-term" or longstanding or "long-standing" or ongoing or persisten*) N2 (comorbid* or (co W0 morbid*) or condition* or disabilit* or disease* or disorder* or ill or illness* or morbidit* or syndrom* or symptom*) ) | Search modes - Boolean/Phrase | Interface - EBSCOhost Research Databases Search Screen - Advanced Search Database - CINAHL Plus with Full Text | 138,197 |
| S1 | (MH "Chronic Disease+")                                                                                                                                                                                                                                                                                                                                                                                                                                                                                            | Search modes - Boolean/Phrase | Interface - EBSCOhost Research Databases Search Screen - Advanced Search Database - CINAHL Plus with Full Text | 68,313  |

Web of Science

# 30 [500](#) #28 AND #24

- 1  
2  
3  
4  
5  
6  
7  
8  
9  
10  
11  
12  
13  
14  
15  
16  
17  
18  
19  
20  
21  
22  
23  
24  
25  
26  
27  
28  
29  
30  
31  
32  
33  
34  
35  
36  
37  
38  
39  
40  
41  
42  
43  
44  
45  
46  
47  
48  
49  
50  
51  
52  
53  
54  
55  
56  
57  
58  
59  
60
- Refined by: PUBLICATION YEARS:** ( 2020 OR 2014 OR 2019 OR 2013 OR 2018 OR 2012 OR 2017 OR 2011 OR 2016 OR 2010 OR 2015 )  
Indexes=SCI-EXPANDED, SSCI, A&HCI, CPCI-S, CPCI-SSH, BKCI-S, BKCI-SSH, ESCI  
Timespan=All years
- # 29 [563](#) #28 AND #24  
Indexes=SCI-EXPANDED, SSCI, A&HCI, CPCI-S, CPCI-SSH, BKCI-S, BKCI-SSH, ESCI  
Timespan=All years
- # 28 [555,169](#) #27 OR #26 OR #25  
Indexes=SCI-EXPANDED, SSCI, A&HCI, CPCI-S, CPCI-SSH, BKCI-S, BKCI-SSH, ESCI  
Timespan=All years
- # 27 [16,091](#) TS=("network MA" or "network MAs") OR TS=(NMA or NMAs or MTC or MTCs or MAIC or MAICs) OR TS=(indirect\* NEAR/0 compar\*) OR TS=(("indirect treatment" or "indirect treatments") NEAR/1 compar\*) OR TS=(("mixed treatment" or "mixed treatments") NEAR/1 compar\*) OR TS=(("multiple treatment" or "multiple treatments") NEAR/1 compar\*) OR TS=(("multi treatment" or "multi treatments") NEAR/1 compar\*) OR TS=(simultaneous\* NEAR/0 compar\*) OR TS=(mixed NEAR/0 comparison\*)  
Indexes=SCI-EXPANDED, SSCI, A&HCI, CPCI-S, CPCI-SSH, BKCI-S, BKCI-SSH, ESCI  
Timespan=All years
- # 26 [15,279](#) **TOPIC:** ("meta-review" or "meta-reviews" or "meta-overview" or "meta-overviews" or (meta NEAR/0 synthes\*)) ) OR **TOPIC:** ("rapid review" or "rapid reviews" or "review of reviews" or "umbrella review" or "umbrella reviews" or "technology assessment" or "technology assessments" or HTA or HTAs)  
Indexes=SCI-EXPANDED, SSCI, A&HCI, CPCI-S, CPCI-SSH, BKCI-S, BKCI-SSH, ESCI  
Timespan=All years
- # 25 [530,270](#) **TOPIC:** ((meta NEAR/0 analy\*) or metanaly\* or metaanaly\* or (met NEAR/0 analy\*)) ) OR **TOPIC:** (integrative NEAR/0 (research or review\* or overview\*)) ) OR **TOPIC:** (research NEAR/0 (integration or overview\*)) ) OR **TOPIC:** (collaborative NEAR/0 review\*) ) OR **TOPIC:** ("systematic review" or "systematic reviews" or "systematic overview" or "systematic overviews") ) OR **TOPIC:** ("evidence-based review" or "evidence-based reviews" or "evidence-based overview" or "evidence-based overviews") ) OR **TOPIC:** (evidence NEAR/3 (review\* or overview\*)) )  
Indexes=SCI-EXPANDED, SSCI, A&HCI, CPCI-S, CPCI-SSH, BKCI-S, BKCI-SSH, ESCI  
Timespan=All years
- # 24 [5,800](#) #23 AND #16  
Indexes=SCI-EXPANDED, SSCI, A&HCI, CPCI-S, CPCI-SSH, BKCI-S, BKCI-SSH, ESCI  
Timespan=All years
- # 23 [688,715](#) #22 OR #21 OR #20 OR #19 OR #18 OR #17  
Indexes=SCI-EXPANDED, SSCI, A&HCI, CPCI-S, CPCI-SSH, BKCI-S, BKCI-SSH, ESCI  
Timespan=All years
- # 22 [64,468](#) **TOPIC:** (ehealth or "e-health" or mhealth or "m-health" or "mobile health") ) OR **TOPIC:** (telecare or "tele-care" or teleconsult\* or (tele NEAR/0 consult\*) or telecounsel\* or (tele NEAR/0 counsel\*) or telehome\* or (tele NEAR/0 home\*) or telemed\* or (tele NEAR/0 med\*) or telemonitor\* or (tele NEAR/0

- monitor\*) or telenurs\* or (tele NEAR/0 nurs\*) or telepsychiatr\* or (tele NEAR/0 psychiatr\*) or telerehab\* or (tele NEAR/0 rehab\*) ) OR **TOPIC:** (remote\* NEAR/3 (care or healthcare or "health care" or consult\* or counsel\* or interven\* or monitor\* or psychiatr\* or rehab\* or treat\* or therap\*) )  
 Indexes=SCI-EXPANDED, SSCI, A&HCI, CPCI-S, CPCI-SSH, BKCI-S, BKCI-SSH, ESCI  
 Timespan=All years
- # 21 [92,415](#) **TOPIC:** ("electronic health record" or "electronic health records") OR **TOPIC:** (EHR or EHRs or EMR or EMRs or PHR or PHRs) OR **TOPIC:** (hotline or hotlines) OR **TOPIC:** (telecommunicat\* or (tele NEAR/0 communicat\*)) )  
 Indexes=SCI-EXPANDED, SSCI, A&HCI, CPCI-S, CPCI-SSH, BKCI-S, BKCI-SSH, ESCI  
 Timespan=All years
- # 20 [357,584](#) **TOPIC:** ((electronic NEAR/0 mail\*) or email\* or "e-mail" or "e-mails" or "e-mailed" or "e-mailing") OR **TOPIC:** (telephon\* or (tele NEAR/0 phon\*) or phone or phoned or phones or phoning or "answering service" or "answering services" or telefacsimile\* or (tele NEAR/0 facsimile) or "telefacsimiles" or FAX) OR **TOPIC:** (televis\* or (tele NEAR/0 vis\*) or TV or TVs or videorecord\* or (video NEAR/0 record\*) or videotap\* or (video NEAR/0 tap\*)) ) OR **TOPIC:** (videoconferenc\* or (video NEAR/0 conferenc\*) or videophon\* or (video NEAR/0 phon\*)) )  
 Indexes=SCI-EXPANDED, SSCI, A&HCI, CPCI-S, CPCI-SSH, BKCI-S, BKCI-SSH, ESCI  
 Timespan=All years
- # 19 [5,843](#) **TOPIC:** (patient\* NEAR/2 (portal or portals) ) OR **TOPIC:** (("health information" or "medical information" or "clinical information") NEAR/3 (portal or portals) ) OR **TOPIC:** (("health data" or "medical data" or "clinical data") NEAR/3 (portal or portals) ) OR **TOPIC:** ("health portal" or "health portals")  
 Indexes=SCI-EXPANDED, SSCI, A&HCI, CPCI-S, CPCI-SSH, BKCI-S, BKCI-SSH, ESCI  
 Timespan=All years
- # 18 [31,855](#) **TOPIC:** (digital\* NEAR/3 (care or healthcare or "health care" or interven\* or consult\* or counsel\* or monitor\* or psychiatr\* or rehab\* or treat\* or therap\*)) ) OR **TOPIC:** (("technology-based" or "technology-facilitated") NEAR/3 (care or healthcare or "health care" or interven\* or consult\* or counsel\* or monitor\* or psychiatr\* or rehab\* or treat\* or therap\*)) ) OR **TOPIC:** (video\* NEAR/3 (care or healthcare or "health care" or interven\* or consult\* or counsel\* or monitor\* or psychiatr\* or rehab\* or treat\* or therap\*)) ) OR **TOPIC:** (virtual\* NEAR/3 (care or healthcare or "health care" or interven\* or consult\* or counsel\* or monitor\* or psychiatr\* or rehab\* or treat\* or therap\*)) )  
 Indexes=SCI-EXPANDED, SSCI, A&HCI, CPCI-S, CPCI-SSH, BKCI-S, BKCI-SSH, ESCI  
 Timespan=All years
- # 17 [190,766](#) **TOPIC:** ((internet\* or online or web or "web-based" or "web-site" or website or www or cyber\* or smartphone\* or "smart phone" or "smart phones" or iphone\* or "i-phone" or "i-phones" or ipad or "i-pad" or ipads or "i-pads") NEAR/3 (care or deliver\* or healthcare or "health care" or consult\* or counsel\* or interven\* or monitor\* or psychiatr\* or rehab\* or service or services or treat\* or therap\*)) ) OR **TOPIC:** ((internet\* or online or web or "web-based" or "web-site" or website or www or cyber\* or smartphone\* or "smart phone" or "smart phones" or iphone\* or "i-phone" or "i-phones" or ipad or "i-pad" or ipads or "i-pads") NEAR/3 (app



or apps or application or applications) ) **OR TOPIC:** (mobile NEAR/3 (app or apps or application or applications) )

Indexes=SCI-EXPANDED, SSCI, A&HCI, CPCI-S, CPCI-SSH, BKCI-S, BKCI-SSH, ESCI  
Timespan=All years

# 16 [283,795](#) #15 AND #9

Indexes=SCI-EXPANDED, SSCI, A&HCI, CPCI-S, CPCI-SSH, BKCI-S, BKCI-SSH, ESCI  
Timespan=All years

# 15 [1,677,770](#) #14 OR #13 OR #12 OR #11 OR #10

Indexes=SCI-EXPANDED, SSCI, A&HCI, CPCI-S, CPCI-SSH, BKCI-S, BKCI-SSH, ESCI  
Timespan=All years

# 14 [94,945](#) **TOPIC:** (PTSD) **OR TOPIC:** (ADDH or ADHD) **OR TOPIC:** ("stress disorder" NEAR/3 (trauma\* or posttrauma\* or post-trauma\*)) **OR TOPIC:** ("stress disorders" NEAR/3 (trauma\* or posttrauma\* or post-trauma\*)) **OR TOPIC:** (neurosis NEAR/3 (trauma\* or posttrauma\* or post-trauma\*)) **OR TOPIC:** (neuroses NEAR/3 (trauma\* or posttrauma\* or post-trauma\*))

Indexes=SCI-EXPANDED, SSCI, A&HCI, CPCI-S, CPCI-SSH, BKCI-S, BKCI-SSH, ESCI  
Timespan=All years

# 13 [1,032,053](#) **TOPIC:** ("attention deficit" or "attention deficits") **OR TOPIC:** (ADDH or

ADHD) **OR TOPIC:** ((hyperkinetic or "hyperkinetic") NEAR/0 syndrome\*) **OR TOPIC:** (depress\*) **OR TOPIC:** (dysthym\*) **OR TOPIC:** ((feel\* NEAR/0 blue) or blues) **OR TOPIC:** (melanchol\*) **OR TOPIC:** (MDD and mental)

Indexes=SCI-EXPANDED, SSCI, A&HCI, CPCI-S, CPCI-SSH, BKCI-S, BKCI-SSH, ESCI  
Timespan=All years

# 12 [73,711](#) TS=((neurocirculatory

NEAR/0 asthenia\*) or "cardiac neurosis" or "cardiac neuroses" or (effort NEAR/0 syndrome\*) or ("hyperkinetic heart" NEAR/0 syndrome\*)) **OR** TS=("neurotic disorder" or "neurotic disorders" or neurosis or neuroses or psychoneurosis or psychoneuroses or "psycho-neurosis" or "psycho-neuroses") **OR** TS=("obsessive-compulsive" or (anankastic NEAR/0 personalit\*) or (compulsive NEAR/0 personalit\*) or (obsessive NEAR/0 personalit\*) or hoarding or psychastheni\*) **OR** TS=(panic NEAR/2 (disorder\* or attack\*)) **OR** TS=(phobia or phobias or phobic) **OR** TS=(catastrophisation\* or catastrophise\* or catastrophising or catastrophization\* or catastrophize\* or catastrophizing)

Indexes=SCI-EXPANDED, SSCI, A&HCI, CPCI-S, CPCI-SSH, BKCI-S, BKCI-SSH, ESCI  
Timespan=All years

# 11 [741,658](#) **TOPIC:** ((affective or mood) NEAR/0 disorder\*) **OR TOPIC:** ((cyclothymic or "cyclothymic") NEAR/0 (disorder\* or personalit\*)) **OR TOPIC:** (anxiety or anxieties or anxious\*) **OR TOPIC:** (GAD) **OR TOPIC:** (hypervigilan\* or (hyper NEAR/0 vigilan\*) or nervous\*) **OR TOPIC:** ((incessan\* or obsessive\* or persistan\* or intense\*) NEAR/3 fear\*) **OR TOPIC:** (agoraphobi\* or claustrophobi\* or homophobi\* or neophobi\* or xenophobi\*)

Indexes=SCI-EXPANDED, SSCI, A&HCI, CPCI-S, CPCI-SSH, BKCI-S, BKCI-SSH, ESCI  
Timespan=All years

- 1  
2  
3  
4 # 10 [29,399](#) **TOPIC:** ((emotional\* or mental\* or psychological\* or  
5 social\*) NEAR/2 health\* NEAR/3 (disorder\* or morbidit\* or comorbid\* or "co-  
6 morbidity" or "co-morbidities" or problem\*))  
7 Indexes=SCI-EXPANDED, SSCI, A&HCI, CPCI-S, CPCI-SSH, BKCI-S, BKCI-SSH, ESCI  
8 Timespan=All years
- 9 # 9 [7,741,29](#) #8 OR #7 OR #6 OR #5 OR #4 OR #3 OR #2 OR #1  
10 [8](#) Indexes=SCI-EXPANDED, SSCI, A&HCI, CPCI-S, CPCI-SSH, BKCI-S, BKCI-SSH, ESCI  
11 Timespan=All years
- 12 # 8 [710,621](#) **TOPIC:** (arterioscleros\* or arterio-scleros\* or atheroscleros\* or athero-  
13 scleros\*) OR **TOPIC:** (hypertens\*) OR **TOPIC:** ((elevated or  
14 high\*) NEAR/2 "blood pressure") OR **TOPIC:** ((elevated or  
15 high\*) NEAR/2 "blood pressures")  
16 Indexes=SCI-EXPANDED, SSCI, A&HCI, CPCI-S, CPCI-SSH, BKCI-S, BKCI-SSH, ESCI  
17 Timespan=All years
- 18 # 7 [1,370,78](#) **TOPIC:** ((artery or arteries or arterial or atrial\* or atrium\* or cardiac\* or cardio\* or  
19 cardiovascul\* or "cardio-vascular" or coronary or heart\* or myocard\* or  
20 ventricle\*) NEAR/3 (arrest\* or aneurysm\* or arrhythmia\* or arrhythmia\* or disease\* or  
21 disorder\* or dysrhythmia\* or dysrhythmia\* or dysfunction\* or failure\* or fibrillation\* or  
22 ischemi\* or infarction\* or obstruct\* or occlu\* or rupture\* or stenosis or stenoses or  
23 syndrom\* or thrombo\* or vasospas\* or "vaso-spasm" or "vaso-spasms")) )  
24 Indexes=SCI-EXPANDED, SSCI, A&HCI, CPCI-S, CPCI-SSH, BKCI-S, BKCI-SSH, ESCI  
25 Timespan=All years
- 26 # 6 [71,527](#) **TOPIC:** (emphysema NEAR/3 (pulmonary or airway\* or "air way" or "air ways" or lung  
27 or lungs or airflow\* or "air flow" or "air flows" or bronchitis or bronchopulmonar\* or  
28 "broncho-pulmonary")) OR **TOPIC:** (COAD or COPD)  
29 Indexes=SCI-EXPANDED, SSCI, A&HCI, CPCI-S, CPCI-SSH, BKCI-S, BKCI-SSH, ESCI  
30 Timespan=All years
- 31 # 5 [54,369](#) **TOPIC:** ("chronic obstructive" NEAR/3 (pulmonary or airway\* or "air way" or "air ways"  
32 or lung or lungs or airflow\* or "air flow" or "air flows" or bronchitis or  
33 bronchopulmonar\* or "broncho-pulmonary")) )  
34 Indexes=SCI-EXPANDED, SSCI, A&HCI, CPCI-S, CPCI-SSH, BKCI-S, BKCI-SSH, ESCI  
35 Timespan=All years
- 36 # 4 [200,828](#) TS=(dyslipidemi\* or dyslipoproteinemi\* or dyslipo-  
37 proteinemi\* or hyperlipemi\* or hyperlipidaemi\* or hyperlipidemi\* or hyper-  
38 lipemi\* or hyper-lipidaemi\* or hyper-  
39 lipidemi\* or lipemi\* or lipidaemi\* or lipidemi\* or hypercholesteraeami\* or hyperchol-  
40 esteremi\* or hyper-cholesteraeami\* or hyper-  
41 cholesteremi\* or hypertriglyceridemi\* or hyper-triglyceridemi\*) OR TS=(inflam\*  
42 NEAR/1 (bowel\* or colon\*)) OR TS=(IBD) OR TS=(Crohn or "Crohn's") OR TS=(ileitis  
43 NEAR/2 (regional or terminal)) OR TS=(Ileocolitis or "ileo-  
44 colitis") OR TS=((proctocolitis or procto-  
45 colitis) NEAR/2 idiopathic) OR TS=((colorectitis or proctocolitis or procto-  
46 colitis) NEAR/2 (ulcer\* or mucosal)) OR TS=("colitis gravis")  
47 Indexes=SCI-EXPANDED, SSCI, A&HCI, CPCI-S, CPCI-SSH, BKCI-S, BKCI-SSH, ESCI  
48 Timespan=All years  
49  
50  
51  
52  
53  
54  
55  
56  
57  
58  
59  
60

- 1  
2  
3 # 3 [867,623](#) **TOPIC:** ((chronic NEAR/2 (renal or kidney\*) NEAR/3 (condition\* or disease\* or  
4 disorder\* or fail\* or insufficien\*)) ) **OR TOPIC:** (CKD or  
5 CKDs) **OR TOPIC:** (diabet\*) **OR TOPIC:** ("Type 1" or "Type I" or "Type 2" or "Type II"  
6 or ID or NID) NEAR/0 DM) **OR TOPIC:** (IDDM or NIDDM)  
7 Indexes=SCI-EXPANDED, SSCI, A&HCI, CPCI-S, CPCI-SSH, BKCI-S, BKCI-SSH, ESCI  
8 Timespan=All years  
9
- 10 # 2 [4,527,936](#) **TOPIC:** (neoplas\* or cancer\* or tumour\* or tumor\* or carcinoma\* or malignan\* or  
11 metasta\* or oncolog\*) **OR TOPIC:** (adenoma\* or adenocarcinoma\* or adeno-  
12 carcinoma\* or blastoma\* or carcinosarcoma\* or carcino-sarcoma\* or hematoma\* or  
13 hepatoblastoma\* or hepato-blastoma\* or leukemia\* or leukaemia\* or lymphoma\* or  
14 melanoma\* or mesenchymoma\* or mesothelioma\* or sarcoma\* or thymoma\*)  
15 Indexes=SCI-EXPANDED, SSCI, A&HCI, CPCI-S, CPCI-SSH, BKCI-S, BKCI-SSH, ESCI  
16 Timespan=All years  
17
- 18 # 1 [1,063,650](#) **TOPIC:** ((chronic\* or longterm or "long-term" or longstanding or "long-standing" or  
19 ongoing or persisten\*) NEAR/2 (comorbid\* or co-morbid\* or condition\* or disabilit\* or  
20 disease\* or disorder\* or ill or illness\* or morbidit\* or syndrom\* or  
21 symptom\*)) **OR TOPIC:** (arthriti\* or arthrosis or arthroses or osteoarthritis\* or osteo-  
22 arthriti\* or osteoarthros\* or osteo-arthros\* or polyarthriti\* or poly-arthriti\* or  
23 spondylarthriti\* or spondyl-arthriti\*) **OR TOPIC:** (asthma\*) **OR TOPIC:** ((chronic\* or  
24 constant\* or continual\* or continuous\* or ceaseless\* or endless\* or incessant\* or  
25 interminabl\* or intractable or longterm or "long-term" or nonstop\* or "non-stop" or  
26 perpetual\* or persist\* or recur\* or refractory or sustained or relentless\* or unabab\* or  
27 unceasing or unending or uninterrupt\* or unrelenting or unrelieved or  
28 unremitt\*) NEAR/3 (neuralgi\* or neuropath\* or pain\*))  
29 Indexes=SCI-EXPANDED, SSCI, A&HCI, CPCI-S, CPCI-SSH, BKCI-S, BKCI-SSH, ESCI  
30 Timespan=All years  
31  
32  
33  
34  
35  
36  
37  
38  
39  
40  
41  
42  
43  
44  
45  
46  
47  
48  
49  
50  
51  
52  
53  
54  
55  
56  
57  
58  
59  
60

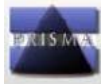

# PRISMA 2009 Checklist

1  
2  
3  
4  
5  
6  
7  
8  
9  
10  
11  
12  
13  
14  
15  
16  
17  
18  
19  
20  
21  
22  
23  
24  
25  
26  
27  
28  
29  
30  
31  
32  
33  
34  
35  
36  
37  
38  
39  
40  
41  
42  
43  
44  
45  
46  
47

| Section/topic                      | #  | Checklist item                                                                                                                                                                                                                                                                                              | Reported on page # |
|------------------------------------|----|-------------------------------------------------------------------------------------------------------------------------------------------------------------------------------------------------------------------------------------------------------------------------------------------------------------|--------------------|
| <b>TITLE</b>                       |    |                                                                                                                                                                                                                                                                                                             |                    |
| Title                              | 1  | Identify the report as a systematic review, meta-analysis, or both.                                                                                                                                                                                                                                         | 1                  |
| <b>ABSTRACT</b>                    |    |                                                                                                                                                                                                                                                                                                             |                    |
| Structured summary                 | 2  | Provide a structured summary including, as applicable: background; objectives; data sources; study eligibility criteria, participants, and interventions; study appraisal and synthesis methods; results; limitations; conclusions and implications of key findings; systematic review registration number. | 2                  |
| <b>INTRODUCTION</b>                |    |                                                                                                                                                                                                                                                                                                             |                    |
| Rationale                          | 3  | Describe the rationale for the review in the context of what is already known.                                                                                                                                                                                                                              | 3                  |
| Objectives                         | 4  | Provide an explicit statement of questions being addressed with reference to participants, interventions, comparisons, outcomes, and study design (PICOS).                                                                                                                                                  | 3                  |
| <b>METHODS</b>                     |    |                                                                                                                                                                                                                                                                                                             |                    |
| Protocol and registration          | 5  | Indicate if a review protocol exists, if and where it can be accessed (e.g., Web address), and, if available, provide registration information including registration number.                                                                                                                               | 1                  |
| Eligibility criteria               | 6  | Specify study characteristics (e.g., PICOS, length of follow-up) and report characteristics (e.g., years considered, language, publication status) used as criteria for eligibility, giving rationale.                                                                                                      | 3                  |
| Information sources                | 7  | Describe all information sources (e.g., databases with dates of coverage, contact with study authors to identify additional studies) in the search and date last searched.                                                                                                                                  | 3-4                |
| Search                             | 8  | Present full electronic search strategy for at least one database, including any limits used, such that it could be repeated.                                                                                                                                                                               | Add file 2         |
| Study selection                    | 9  | State the process for selecting studies (i.e., screening, eligibility, included in systematic review, and, if applicable, included in the meta-analysis).                                                                                                                                                   | 4                  |
| Data collection process            | 10 | Describe method of data extraction from reports (e.g., piloted forms, independently, in duplicate) and any processes for obtaining and confirming data from investigators.                                                                                                                                  | 4                  |
| Data items                         | 11 | List and define all variables for which data were sought (e.g., PICOS, funding sources) and any assumptions and simplifications made.                                                                                                                                                                       | 4                  |
| Risk of bias in individual studies | 12 | Describe methods used for assessing risk of bias of individual studies (including specification of whether this was done at the study or outcome level), and how this information is to be used in any data synthesis.                                                                                      | 4                  |
| Summary measures                   | 13 | State the principal summary measures (e.g., risk ratio, difference in means).                                                                                                                                                                                                                               | NA                 |
| Synthesis of results               | 14 | Describe the methods of handling data and combining results of studies, if done, including measures of consistency (e.g., I <sup>2</sup> ) for each meta-analysis.                                                                                                                                          | NA                 |

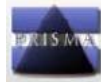

# PRISMA 2009 Checklist

Page 1 of 2

| Section/topic                 | #  | Checklist item                                                                                                                                                                                           | Reported on page # |
|-------------------------------|----|----------------------------------------------------------------------------------------------------------------------------------------------------------------------------------------------------------|--------------------|
| Risk of bias across studies   | 15 | Specify any assessment of risk of bias that may affect the cumulative evidence (e.g., publication bias, selective reporting within studies).                                                             | 4                  |
| Additional analyses           | 16 | Describe methods of additional analyses (e.g., sensitivity or subgroup analyses, meta-regression), if done, indicating which were pre-specified.                                                         | NA                 |
| <b>RESULTS</b>                |    |                                                                                                                                                                                                          |                    |
| Study selection               | 17 | Give numbers of studies screened, assessed for eligibility, and included in the review, with reasons for exclusions at each stage, ideally with a flow diagram.                                          | 4,8                |
| Study characteristics         | 18 | For each study, present characteristics for which data were extracted (e.g., study size, PICOS, follow-up period) and provide the citations.                                                             | 11-17              |
| Risk of bias within studies   | 19 | Present data on risk of bias of each study and, if available, any outcome level assessment (see item 12).                                                                                                | 18                 |
| Results of individual studies | 20 | For all outcomes considered (benefits or harms), present, for each study: (a) simple summary data for each intervention group (b) effect estimates and confidence intervals, ideally with a forest plot. | 11-17              |
| Synthesis of results          | 21 | Present results of each meta-analysis done, including confidence intervals and measures of consistency.                                                                                                  | NA                 |
| Risk of bias across studies   | 22 | Present results of any assessment of risk of bias across studies (see Item 15).                                                                                                                          | 18                 |
| Additional analysis           | 23 | Give results of additional analyses, if done (e.g., sensitivity or subgroup analyses, meta-regression [see Item 16]).                                                                                    | 19                 |
| <b>DISCUSSION</b>             |    |                                                                                                                                                                                                          |                    |
| Summary of evidence           | 24 | Summarize the main findings including the strength of evidence for each main outcome; consider their relevance to key groups (e.g., healthcare providers, users, and policy makers).                     | 6-7                |
| Limitations                   | 25 | Discuss limitations at study and outcome level (e.g., risk of bias), and at review-level (e.g., incomplete retrieval of identified research, reporting bias).                                            | 7                  |
| Conclusions                   | 26 | Provide a general interpretation of the results in the context of other evidence, and implications for future research.                                                                                  | 7                  |
| <b>FUNDING</b>                |    |                                                                                                                                                                                                          |                    |
| Funding                       | 27 | Describe sources of funding for the systematic review and other support (e.g., supply of data); role of funders for the systematic review.                                                               | 1                  |

From: Moher D, Liberati A, Tetzlaff J, Altman DG, The PRISMA Group (2009). Preferred Reporting Items for Systematic Reviews and Meta-Analyses: The PRISMA Statement. PLoS Med 6(7): e1000097. doi:10.1371/journal.pmed1000097

For more information, visit: [www.prisma-statement.org](http://www.prisma-statement.org).

Page 2 of 2

For peer review only - <http://bmjopen.bmj.com/site/about/guidelines.xhtml>
