# Supplementary material for: Digital health interventions for the management of mental health in people with chronic diseases: a rapid review
Source: PubMed Central journal article supplement — BMJ Open. 2021 Apr 5;11(4):e044437. doi: 10.1136/bmjopen-2020-044437 (PMC8030477; doi:10.1136/bmjopen-2020-044437), 2021-04-05
Supplement: bmjopen-2020-044437.reviewer_comments.pdf [file bmjopen-2020-044437.reviewer_comments.pdf]

## PEER REVIEW HISTORY

BMJ Open publishes all reviews undertaken for accepted manuscripts. Reviewers are asked to complete a checklist review form (<http://bmjopen.bmj.com/site/about/resources/checklist.pdf>) and are provided with free text boxes to elaborate on their assessment. These free text comments are reproduced below.

### ARTICLE DETAILS

|                            |                                                                                                                                                                                                                                                                                       |
|----------------------------|---------------------------------------------------------------------------------------------------------------------------------------------------------------------------------------------------------------------------------------------------------------------------------------|
| <b>TITLE (PROVISIONAL)</b> | Digital health interventions for the management of mental health in people with chronic diseases: a rapid review.                                                                                                                                                                     |
| <b>AUTHORS</b>             | Sasseville, Maxime; LeBlanc, Annie; Boucher, Mylène; Dugas, Michèle; Mbemba, Gisele; Tchuente, Jack; Chouinard, Maud-Christine; Beaulieu, Marianne; Beaudet, Nicolas; Skidmore, Becky; Cholette, Pascale; Aspiros, Christine; Larouche, Alain; Chabot, Guylaine; Gagnon, Marie-Pierre |

### VERSION 1 – REVIEW

|                        |                                                                              |
|------------------------|------------------------------------------------------------------------------|
| <b>REVIEWER</b>        | Sherif Badawy, MD, MS<br>Northwestern University Feinberg School of Medicine |
| <b>REVIEW RETURNED</b> | 07-Dec-2020                                                                  |

|                         |                                                                                                                                                                                                                                                                                                                                                                                                                                                                                                                                                                                                                                                                                                                                                                                                                                                                                                                                                                                                                                                                                                                                    |
|-------------------------|------------------------------------------------------------------------------------------------------------------------------------------------------------------------------------------------------------------------------------------------------------------------------------------------------------------------------------------------------------------------------------------------------------------------------------------------------------------------------------------------------------------------------------------------------------------------------------------------------------------------------------------------------------------------------------------------------------------------------------------------------------------------------------------------------------------------------------------------------------------------------------------------------------------------------------------------------------------------------------------------------------------------------------------------------------------------------------------------------------------------------------|
| <b>GENERAL COMMENTS</b> | <p>Thanks for the opportunity to review this manuscript entitled "Digital health interventions for the management of mental health in people with chronic diseases: a rapid review". The authors report on an important topic and their research work will contribute to the existing literature related to mhealth interventions in chronic conditions. Overall, the manuscript is well written with enough details in different sections. The authors followed rigorous methodology. Tables and figures are informative. Below are some comments/concerns for the authors to consider.</p> <ul style="list-style-type: none"><li>- Discussion, the authors should expand and elaborate more on how their findings support or contrast available literature and provide suggestions for future research directions that would address existing knowledge gaps.</li><li>- Discussion, include a paragraph on the strengths of the study.</li><li>- Discussion, the authors should also acknowledge the lack of economic data to support the use of digital health interventions to date (PMID: 27780795; PMID: 28152012)</li></ul> |
|-------------------------|------------------------------------------------------------------------------------------------------------------------------------------------------------------------------------------------------------------------------------------------------------------------------------------------------------------------------------------------------------------------------------------------------------------------------------------------------------------------------------------------------------------------------------------------------------------------------------------------------------------------------------------------------------------------------------------------------------------------------------------------------------------------------------------------------------------------------------------------------------------------------------------------------------------------------------------------------------------------------------------------------------------------------------------------------------------------------------------------------------------------------------|

|                        |                                       |
|------------------------|---------------------------------------|
| <b>REVIEWER</b>        | Mohan Karunanithi<br>CSIRO, Australia |
| <b>REVIEW RETURNED</b> | 10-Dec-2020                           |

|                         |                                                                                                                                                                                                                                                                                                                                                                                                                                                                                                 |
|-------------------------|-------------------------------------------------------------------------------------------------------------------------------------------------------------------------------------------------------------------------------------------------------------------------------------------------------------------------------------------------------------------------------------------------------------------------------------------------------------------------------------------------|
| <b>GENERAL COMMENTS</b> | <p>The authors have undertaken a very structured (using the appropriate tools and methods) approach towards rapidly presenting a review of systematic reviews on the effectiveness of digital health intervention in addressing mental health with preexisting chronic condition. This review clearly presents outcomes that digital health intervention can be effective in managing mental health problems, evidence of studies being limited to web-based and not other digital mediums.</p> |
|-------------------------|-------------------------------------------------------------------------------------------------------------------------------------------------------------------------------------------------------------------------------------------------------------------------------------------------------------------------------------------------------------------------------------------------------------------------------------------------------------------------------------------------|

## VERSION 1 – AUTHOR RESPONSE

Reviewer: 1

Dr. Sherif Badawy, Ann & Robert H. Lurie Children's Hospital of Chicago

Comments to the Author:

Thanks for the opportunity to review this manuscript entitled "Digital health interventions for the management of mental health in people with chronic diseases: a rapid review". The authors report on an important topic and their research work will contribute to the existing literature related to mhealth interventions in chronic conditions. Overall, the manuscript is well written with enough details in different sections. The authors followed rigorous methodology. Tables and figures are informative. Below are some comments/concerns for the authors to consider.

Comment 1: Discussion, the authors should expand and elaborate more on how their findings support or contrast available literature and provide suggestions for future research directions that would address existing knowledge gaps.

Authors answer: We agree that the discussion doesn't result in recommendations for future research. We added a paragraph after the limitations in the discussion.

Comment 2: Discussion, include a paragraph on the strengths of the study.

Authors answer: Thank you for your comment about the lack of paragraph on the strength of our study. It was added in the discussion before the limitations paragraph.

Comment 3: Discussion, the authors should also acknowledge the lack of economic data to support the use of digital health interventions to date (PMID: 27780795; PMID: 28152012)

Authors answer: Thank you for that valuable insight on cost analysis of digital health interventions and for the references provided. Even with reports of effectiveness, cost analysis is an important factor in implementation and use of digital interventions that the knowledge users should know. We added the information in the discussion, supported with the references provided.

Reviewer: 2

Dr. Mohan Karunanithi, The University of Queensland

Comments to the Author:

Comment 1:

The authors have undertaken a very structured (using the appropriate tools and methods) approach towards rapidly presenting a review of systematic reviews on the effectiveness of digital health intervention in addressing mental health with preexisting chronic condition. This review clearly presents outcomes that digital health intervention can be effective in managing mental health problems, evidence of studies being limited to web-based and not other digital mediums.

Authors answer: We would like to thank the reviewer for highlighting some of the strengths and points of relevance of our study, we used this information in the improvements suggested by the reviewer 1.

Editor comment:

**FORMATTING AMENDMENTS**

Required amendments will be listed here; please include these changes in your revised version:

Amendment 1: Please include figure legends at the end of your main manuscript.

Authors answer: The figures legends were provided after the statements in the main manuscript.

Amendment 2: Kindly embed your table (should be editable and in table tools format). Tables should be placed in the main text where the table is first cited.

Authors answer: the tables were embedded in the main manuscript.

Amendment 3: We have noticed that you have uploaded the file “Search strategy“ under 'supplementary file'. However, we cannot see any citation for this file within the main text. If this file needs to be published as supplementary file, please cite it as 'supplementary file' in the main text. Otherwise, kindly change its file designation to 'Supplementary file for editors only'.

Authors answer: Thank you for pointing it out. The supplementary file 1 citation was added in the literature search section.
