# Supplementary material for: Digital health interventions for the management of mental health in people with chronic diseases: a rapid review
Source: PubMed Central journal article supplement — BMJ Open. 2021 Apr 5;11(4):e044437. doi: 10.1136/bmjopen-2020-044437 (PMC8030477; doi:10.1136/bmjopen-2020-044437), 2021-04-05
Supplement: bmjopen-2020-044437supp001.pdf [file bmjopen-2020-044437supp001.pdf]

**Additional Table 1. Type of intervention and outcomes**

|                                   | Web-based | Patient portal | Phone application | Virtual reality | Email | Text message | Online chat | Teleconsultation | Depression outcomes | Anxiety outcomes | Other mental health outcomes |
|-----------------------------------|-----------|----------------|-------------------|-----------------|-------|--------------|-------------|------------------|---------------------|------------------|------------------------------|
| <b>CHRONIC DISEASES CLUSTER</b>   |           |                |                   |                 |       |              |             |                  |                     |                  |                              |
| Hedman, 2012 (23)                 | X         |                |                   |                 |       |              |             |                  | +++                 | +++              | NR                           |
| Eccleston, 2019 (19)              | X         | X              |                   |                 |       |              |             | X                | =                   | =                | NR                           |
| van Beugen, 2014 (42)             | X         | X              | X                 | X               | X     | X            |             |                  | +                   | =                | =                            |
| Vugts, 2018 (43)                  | X         |                |                   |                 | X     | X            | X           | X                | +                   | NR               | NR                           |
| Charova 2015 (16)                 | X         |                |                   |                 |       |              |             |                  | +                   | NR               | NR                           |
| Palacios, 2017 (36)               | X         | X              | X                 | X               |       |              |             |                  | +                   | NR               | NR                           |
| McCombie, 2015 (31)               | X         |                |                   |                 |       |              |             |                  | +                   | +                | NR                           |
| Beatty 2013 (14)                  | X         | X              | X                 |                 |       |              |             | X                | +                   | +                | NR                           |
| Toivonen, 2017(40)                | X         |                |                   |                 | X     |              | X           |                  | +                   | +                | NR                           |
| Mehta, 2018 (33)                  | X         |                |                   |                 | X     |              |             |                  | ++                  | +                | NR                           |
| Mikolasek, 2018 (34)              | X         |                |                   |                 |       |              |             |                  | +                   | +                | NR                           |
| Paul, 2013 (37)                   | X         |                |                   |                 |       |              | X           |                  | +                   | +                | +/-                          |
| Clari, 2020 (18)                  |           |                |                   |                 |       |              |             | X                | =                   | =                | NR                           |
| <b>CANCER POPULATION CLUSTER</b>  |           |                |                   |                 |       |              |             |                  |                     |                  |                              |
| Chen, 2018 (17)                   | X         |                |                   |                 |       |              |             | X                | +++                 | +                | +                            |
| McCaughan, 2017 (30)              | X         | X              |                   |                 | X     |              | X           |                  | =                   | +                | NR                           |
| Wang, 2020 (44)                   | X         | X              |                   |                 | X     |              |             |                  | +                   | ++               | NR                           |
| Zeng, 2019 (46)                   |           |                |                   | X               |       |              |             |                  | =                   | =                | NR                           |
| Kim, 2015 (24)                    | X         |                |                   |                 | X     | X            | X           | X                | +                   | +                | +                            |
| Kim, 2017 (25)                    | X         |                |                   |                 |       |              |             | X                | =                   | =                | NR                           |
| Lin, 2020 (27)                    | X         | X              |                   |                 | X     | X            |             |                  | +/-                 | +/-              | NR                           |
| Qan'ir, 2019 (38)                 | X         | X              |                   |                 |       |              | X           |                  | +/-                 | +/-              | NR                           |
| Forbes, 2019 (21)                 | X         |                |                   |                 | X     |              | X           |                  | +                   | NR               | +                            |
| Fridriksdottir, 2017 (22)         | X         |                |                   |                 | X     |              |             |                  | +/-                 | +/-              | +/-                          |
| Bouma 2015 (15)                   | X         |                |                   |                 |       |              |             |                  | +/-                 | +/-              | +/-                          |
| Ugalde, 2015 (41)                 | X         |                |                   |                 |       |              |             |                  | NR                  | NR               | +                            |
| Agboola 2015 (12)                 | X         | X              | X                 |                 | X     | X            | X           | X                | =                   | +/-              | +/-                          |
| Bartolo 2019 (13)                 | X         |                |                   |                 | X     |              |             | X                | +                   | NR               | +                            |
| <b>YOUTH AND CHILDREN CLUSTER</b> |           |                |                   |                 |       |              |             |                  |                     |                  |                              |
| Fisher, 2019 (20)                 | X         | X              |                   |                 |       |              |             |                  | +                   | +                | NR                           |
| Tang, 2018 (39)                   | X         |                |                   |                 |       |              |             |                  | +                   | +++              | NR                           |
| McGar, 2019 (32)                  | X         |                |                   |                 |       |              |             |                  | +/-                 | +                | +                            |
| Lopez-Rodriguez, 2020 (28)        |           | X              | X                 |                 |       |              |             |                  | +                   | +                | NR                           |
| <b>MENTAL HEALTH POPULATION</b>   |           |                |                   |                 |       |              |             |                  |                     |                  |                              |
| MayoWilson, 2013 (29)             | X         |                |                   |                 | X     | X            |             | X                | NR                  | ++               | NR                           |
| Olthuis, 2016 (35)                | X         | X              |                   |                 | X     |              | X           |                  | NR                  | ++               | NR                           |
| Wickersham, 2019 (45)             |           | X              |                   |                 |       |              |             |                  | NR                  | NR               | =                            |
| Lewis, 2018 (26)                  | X         |                |                   |                 |       |              |             |                  | ++                  | +                | ++                           |

NOTE: NR: not reported, + : small effect size or improvement without a report on effect size; ++ : moderate effect size ; +++ : large effect size; +/- : mixed effect ; = : no difference.
