# Supplementary material for: Digital health interventions for the management of mental health in people with chronic diseases: a rapid review
Source: PubMed Central journal article supplement — BMJ Open. 2021 Apr 5;11(4):e044437. doi: 10.1136/bmjopen-2020-044437 (PMC8030477; doi:10.1136/bmjopen-2020-044437), 2021-04-05
Supplement: bmjopen-2020-044437supp002.pdf [file bmjopen-2020-044437supp002.pdf]

## Chronic Disease – Mental Health

Final Strategies

2020 Jun 11

Ovid Multifile

Database: Ovid MEDLINE: Epub Ahead of Print, In-Process &amp; Other Non-Indexed Citations, Ovid MEDLINE® Daily and Ovid MEDLINE® &lt;1946-Present&gt;, Embase Classic+Embase &lt;1947 to 2020 June 10&gt;

Search Strategy:

- 
- 1 exp Chronic Disease/ (463877)
  - 2 ((chronic\* or longterm or long-term or longstanding or long-standing or ongoing or persisten\*) adj2 (comorbid\* or co-morbid\* or condition\* or disabilit\* or disease\* or disorder\* or ill or illness\* or morbidit\* or syndrom\* or symptom\*)).tw,kf. (817409)
  - 3 1 or 2 [CHRONIC DISEASE - GENERAL] (1148521)
  - 4 exp Arthritis/ (769208)
  - 5 (arthriti\* or arthros#s or osteoarthriti\* or osteo-arthriti\* or osteoarthros#s or osteo-arthros#s or polyarthriti\* or poly-arthriti\* or spondylarthriti\* or spondyl-arthriti\*).tw,kf. (624493)
  - 6 exp Asthma/ (402927)
  - 7 asthma\*.tw,kf. (397483)
  - 8 Chronic Pain/ (75237)
  - 9 Pain, Intractable/ (9868)
  - 10 ((chronic\* or constant\* or continual\* or continuous\* or ceaseless\* or endless\* or incessant\* or interminabl\* or intractable or longterm or long-term or nonstop\* or non-stop\* or perpetual\* or persist\* or recur\* or refractory or sustained or relentless\* or unabat\* or unceasing or unending or uninterrupt\* or unrelenting or unrelieved or unremitt\*) adj3 (neuralgi\* or neuropath\* or pain\*)).tw,kf. (240054)
  - 11 exp Neoplasms/ (8206156)
  - 12 (neoplas\* or cancer\* or tumour\* or tumor\* or carcinoma\* or malignan\* or metasta\* or oncolog\*).tw,kf. (8138150)
  - 13 (adenoma\* or adenocarcinoma\* or adeno-carcinoma\* or blastoma\* or carcinosarcoma\* or carcino-sarcoma\* or hematoma\* or hepatoblastoma\* or hepato-blastoma\* or leukemia\* or leukaemia\* or lymphoma\* or melanoma\* or mesenchymoma\* or mesothelioma\* or sarcoma\* or thymoma\*).tw,kf. (1224311)
  - 14 Renal Insufficiency, Chronic/ (83228)
  - 15 (chronic adj2 (renal or kidney\*) adj3 (condition\* or disease\* or disorder\* or fail\* or insufficien\*)).tw,kf. (202396)
  - 16 (CKD or CKDs).tw,kf. (80295)
  - 17 Diabetes Mellitus/ (704972)
  - 18 Diabetes Mellitus, Type 1/ (112248)
  - 19 Diabetes Mellitus, Type 2/ (196848)
  - 20 Latent Autoimmune Diabetes in Adults/ (376)
  - 21 diabet\*.tw,kf. (1602750)
  - 22 ("Type 1" or "Type I" or "Type 2" or "Type II" or ID or NID) adj DM).tw,kf. (12572)
  - 23 (IDDM or NIDDM).tw,kf. (27091)
  - 24 exp Dyslipidemias/ (150214)
  - 25 (dyslipidemi\* or dyslipoproteinemi\* or dyslipo-proteinemi\* or hyperlipemi\* or hyperlipid?emi\* or hyper-lipemi\* or hyper-lipid?emi\* or lipemi\* or lipid?emi\* or hypercholester?emi\* or hypercholester?emi\* or hypertriglyceridemi\* or hyper-triglyceridemi\*).tw,kf. (196503)

- 26 exp Inflammatory Bowel Diseases/ (238290)  
27 (inflamm\* adj1 (bowel\* or colon\*)).tw,kf. (134937)  
28 IBD.tw,kf. (77069)  
29 (Crohn or "Crohn's").tw,kf. (128042)  
30 (ileitis adj2 (regional or terminal)).tw,kf. (2372)  
31 (Ileocolitis or ileo-colitis).tw,kf. (1234)  
32 ((proctocolitis or procto-colitis) adj2 idiopathic).tw,kf. (93)  
33 ((colorectitis or proctocolitis or procto-colitis) adj2 (ulcer\* or mucosal)).tw,kf. (169)  
34 colitis gravis.tw,kf. (11)  
35 exp Pulmonary Disease, Chronic Obstructive/ (189609)  
36 (chronic adj2 obstructi\* adj3 (pulmonary or airway\* or air way\* or lung or lungs or airflow\* or air flow\* or bronchitis or bronchopulmonar\* or broncho-pulmonar\*)).tw,kf. (134589)  
37 (emphysema? adj3 (pulmonary or airway\* or air way\* or lung or lungs or airflow\* or air flow\* or centriacinar or centri-acinar or centrilobular or centri-lobular or panacinar or pan-acinar or panlobular or pan-lobular)).tw,kf. (22235)  
38 (COPD or COAD).tw,kf. (134068)  
39 exp Cardiovascular Diseases/ (6804416)  
40 ((artery or arteries or arterial or atrial\* or atrium\* or cardiac\* or cardio\* or cardiovascul\* or cardiovascular\* or coronary or heart\* or myocard\* or ventricle\*) adj3 (arrest\* or aneurysm\* or arrhythmia\* or arrhythmia\* or disease\* or disorder\* or dysrhythmia\* or dysrhythmia\* or dysfunction\* or failure\* or fibrillation\* or ischemi\* or infarction\* or obstruct\* or occlu\* or rupture\* or stenosis or syndrom\* or thrombo\* or vasospas\* or vaso-spas\*)).tw,kf. (2646364)  
41 (arterioscleros\* or arterio-scleros\* or atheroscleros\* or athero-scleros\*).tw,kf. (312159)  
42 hypertens\*.tw,kf. (1128918)  
43 ((elevated or high\*) adj2 blood pressure\*).tw,kf. (81424)  
44 or/4-43 [ITEMIZED CHRONIC DISEASES] (19898982)  
45 3 or 44 [CHRONIC DISEASES, INCLUDING NAMED CONDITIONS] (20427001)  
46 ((emotional\* or mental\* or psychological\* or social\*) adj2 health\* adj3 (disorder\* or morbidit\* or comorbid\* or co-morbidit\* or problem\*)).tw,kf. (48561)  
47 Mood Disorders/ (26170)  
48 ((affective or mood) adj disorder?).tw,kf. (80447)  
49 Cyclothymic Disorder/ (1679)  
50 ((cyclothymic or cyclo-thymic) adj (disorder? or personalit\*)).tw,kf. (283)  
51 exp Anxiety Disorders/ (324405)  
52 exp Anxiety/ (303024)  
53 (anxiety or anxieties or anxious\*).tw,kf. (489510)  
54 GAD.tw,kf. (22867)  
55 (hypervigilan\* or hyper-vigilan\* or nervous\*).tw,kf. (722745)  
56 ((incessan\* or obsessive\* or persistan\* or intense\*) adj3 fear\*).tw,kf. (1060)  
57 (agoraphobi\* or claustrophobi\* or homophobi\* or neophobi\* or xenophobi\*).tw,kf. (14836)  
58 (neurocirculatory asthenia\* or cardiac neurosis or effort syndrome\* or hyperkinetic heart syndrome\*).tw,kf. (1377)  
59 (neurotic disorder\* or neurosis or psychoneurosis or psycho-neurosis).tw,kf. (25227)  
60 (obsessive-compulsive or anankastic personalit\* or compulsive personalit\* or obsessive personalit\* or hoarding or psychastheni\*).tw,kf. (44492)  
61 (panic disorder\* or (panic adj2 attack\*)).tw,kf. (25995)  
62 (phobia or phobias or phobic).tw,kf. (27494)  
63 (catastrophization? or catastrophi#e\* or catastrophi#ing).tw,kf. (8601)

- 64 Attention Deficit Disorder with Hyperactivity/ (49515)  
65 attention deficit\*.tw,kf. (67522)  
66 (ADDH or ADHD).tw,kf. (61164)  
67 ((hyperkinetic or hyper-kinetic) adj syndrome?).tw,kf. (891)  
68 exp Depressive Disorder/ (590789)  
69 Depression/ (488522)  
70 depress\*.tw,kf. (1107871)  
71 dysthym\*.tw,kf. (7359)  
72 (feel\* blue or blues).tw,kf. (4041)  
73 melanchol\*.tw,kf. (7378)  
74 (MDD and mental).tw,kf. (4373)  
75 Stress Disorders, Traumatic/ (37504)  
76 Stress Disorders, Post-Traumatic/ (52151)  
77 PTSD.tw,kf. (56027)  
78 (stress disorder? adj3 (trauma\* or posttrauma\* or post-trauma\*)).tw,kf. (65507)  
79 (neuros#s adj3 (trauma\* or posttrauma\* or post-trauma\*)).tw,kf. (723)  
80 or/46-79 [MENTAL/MOOD DISORDERS - GENERAL AND NAMED] (2618889)  
81 45 and 80 [CHRONIC DISEASE & MENTAL HEALTH PROBLEMS] (700259)  
82 Computer Communication Networks/ (27176)  
83 Local Area Networks/ (1636)  
84 Internet/ (180650)  
85 Internet-Based Intervention/ (311)  
86 ((internet or online or web or web-based or web-site or website or www or cyber\* or smartphone\* or smart phone\* or iphone\* or i-phone\* or ipad or i-pad or ipads or i-pads) adj3 (care or deliver\* or healthcare or health care or consult\* or counsel\* or interven\* or monitor\* or psychiatr\* or rehab\* or service? or treat\* or therap\*)).tw,kf. (47403)  
87 Smartphone/ (16414)  
88 ((internet or online or web or web-based or web-site or website or www or cyber\* or smartphone\* or smart phone\* or iphone\* or i-phone\* or ipad or i-pad or ipads or i-pads) adj3 (app or apps or application?)).tw,kf. (24259)  
89 (mobile adj3 (app or apps or application?)).tw,kf. (14699)  
90 (digital\* adj3 (care or healthcare or health care or interven\* or consult\* or counsel\* or monitor\* or psychiatr\* or rehab\* or treat\* or therap\*)).tw,kf. (12470)  
91 ((technology-based or technology-facilitated) adj3 (care or healthcare or health care or interven\* or consult\* or counsel\* or monitor\* or psychiatr\* or rehab\* or treat\* or therap\*)).tw,kf. (1460)  
92 (video\* adj3 (care or healthcare or health care or interven\* or consult\* or counsel\* or monitor\* or psychiatr\* or rehab\* or treat\* or therap\*)).tw,kf. (21536)  
93 (virtual\* adj3 (care or healthcare or health care or interven\* or consult\* or counsel\* or monitor\* or psychiatr\* or rehab\* or treat\* or therap\*)).tw,kf. (8491)  
94 Patient Portals/ (182923)  
95 (patient? adj2 (portal or portals)).tw,kf. (11947)  
96 ((health information or medical information or clinical information) adj3 (portal or portals)).tw,kf. (155)  
97 ((health data or medical data or clinical data) adj3 (portal or portals)).tw,kf. (67)  
98 health portal?.tw,kf. (314)  
99 Electronic Mail/ (24709)  
100 (electronic mail\* or email\* or e-mail\*).tw,kf. (51152)  
101 exp Telephone/ (60582)

- 102 (telephon\* or tele-phon\* or phone or phoned or phones or phoning or answering service? or telefacsimile\* or tele-facsimile\* or FAX).tw,kf. (209278)
- 103 exp Television/ (49238)
- 104 (televis\* or tele-vis\* or TV or TVs or videorecord\* or video-record\* or videotap\* or videotap\*).tw,kf. (116545)
- 105 Videoconferencing/ (5321)
- 106 (videoconferenc\* or video-conference\* or videophon\* or video-phon\*).tw,kf. (6099)
- 107 Electronic Health Records/ (34655)
- 108 electronic health record?.tw,kf. (37890)
- 109 (EHR or EHRs or EMR or EMRs or PHR or PHRs).tw,kf. (46151)
- 110 Hotlines/ (3062)
- 111 hotline?.tw,kf. (2749)
- 112 Telecommunications/ (30245)
- 113 (telecommunicat\* or tele-communicat\*).tw,kf. (8599)
- 114 exp Telemedicine/ (67951)
- 115 Telenursing/ (487)
- 116 (ehealth or e-health or mhealth or m-health or mobile health).tw,kf. (23436)
- 117 (telecare or tele-care or teleconsult\* or tele-consult\* or telecounsel\* or tele-counsel\* or telehome\* or tele-home\* or telemed\* or tele-med\* or telemonitor\* or tele-monitor\* or telenurs\* or tele-nurs\* or telepsychiatr\* or tele-psychiatr\* or telerehab\* or tele-rehab\*).tw,kf. (37038)
- 118 (remote\$2 adj3 (care or healthcare or health care or consult\* or counsel\* or interven\* or monitor\* or psychiatr\* or rehab\* or treat\* or therap\*).tw,kf. (17186)
- 119 or/82-118 [DIGITAL HEALTH TECHNOLOGIES] (1032076)
- 120 81 and 119 [CHRONIC DISEASE & MENTAL HEALTH PROBLEMS - DIGITAL HEALTH TECHNOLOGIES] (18971)
- 121 Systematic Review.pt. (128913)
- 122 exp Systematic Reviews as Topic/ (28375)
- 123 Meta Analysis.pt. (115626)
- 124 exp Meta-Analysis as Topic/ (61507)
- 125 (meta-analy\* or metanaly\* or metaanaly\* or met analy\* or integrative research or integrative review\* or integrative overview\* or research integration or research overview\* or collaborative review\*).tw,kf. (411235)
- 126 (systematic review\* or systematic overview\* or evidence-based review\* or evidence-based overview\* or (evidence adj3 (review\* or overview\*)) or meta-review\* or meta-overview\* or meta-synthes\* or rapid review\* or "review of reviews" or umbrella review? or technology assessment\* or HTA or HTAs).tw,kf. (492109)
- 127 exp Technology Assessment, Biomedical/ (25470)
- 128 (cochrane or health technology assessment or evidence report or systematic reviews).jw. (47503)
- 129 (network adj (MA or MAs)).tw,kf. (30)
- 130 (NMA or NMAs or MTC or MTCs or MAIC or MAICs).tw,kf. (17980)
- 131 indirect\* compar\*.tw,kf. (5582)
- 132 (indirect treatment\* adj1 compar\*).tw,kf. (910)
- 133 (mixed treatment\* adj1 compar\*).tw,kf. (1327)
- 134 (multiple treatment\* adj1 compar\*).tw,kf. (387)
- 135 (multi-treatment\* adj1 compar\*).tw,kf. (8)
- 136 simultaneous\* compar\*.tw,kf. (2407)
- 137 mixed comparison?.tw,kf. (73)
- 138 or/121-137 [REVIEWS] (850383)

- 139 120 and 138 [REVIEWS - CHRONIC DISEASE & MENTAL HEALTH PROBLEMS - DIGITAL HEALTH TECHNOLOGIES] (638)
- 140 exp Animals/ not Humans/ (17305531)
- 141 139 not 140 [ANIMAL-ONLY REMOVED] (431)
- 142 limit 141 to yr="2010-current" (370)
- 143 142 use ppez [MEDLINE RECORDS] (178)
- 144 exp chronic disease/ (463877)
- 145 ((chronic\* or longterm or long-term or longstanding or long-standing or ongoing or persisten\*) adj2 (comorbid\* or co-morbid\* or condition\* or disabilit\* or disease\* or disorder\* or ill or illness\* or morbidit\* or syndrom\* or symptom\*)).tw,kw. (822925)
- 146 144 or 145 [CHRONIC DISEASE - GENERAL] (1153511)
- 147 exp arthritis/ (769208)
- 148 (arthriti\* or arthros#s or osteoarthriti\* or osteo-arthriti\* or osteoarthros#s or osteo-arthros#s or polyarthriti\* or poly-arthriti\* or spondylarthriti\* or spondyl-arthriti\*).tw,kw. (631277)
- 149 exp asthma/ (402927)
- 150 asthma\*.tw,kw. (402449)
- 151 chronic pain/ (75237)
- 152 intractable pain/ (11527)
- 153 ((chronic\* or constant\* or continual\* or continuous\* or ceaseless\* or endless\* or incessant\* or interminabl\* or intractable or longterm or long-term or nonstop\* or non-stop\* or perpetual\* or persist\* or recur\* or refractory or sustained or relentless\* or unabat\* or unceasing or unending or uninterrupt\* or unrelenting or unrelieved or unremitt\*) adj3 (neuralgi\* or neuropath\* or pain\*)).tw,kw. (242272)
- 154 exp malignant neoplasm/ (6996129)
- 155 (neoplas\* or cancer\* or tumour\* or tumor\* or carcinoma\* or malignan\* or metasta\* or oncolog\*).tw,kw. (8161179)
- 156 (adenoma\* or adenocarcinoma\* or adeno-carcinoma\* or blastoma\* or carcinosarcoma\* or carcino-sarcoma\* or hematoma\* or hepatoblastoma\* or hepato-blastoma\* or leukemia\* or leukaemia\* or lymphoma\* or melanoma\* or mesenchymoma\* or mesothelioma\* or sarcoma\* or thymoma\*).tw,kw. (1236437)
- 157 exp chronic kidney failure/ (193963)
- 158 (chronic adj2 (renal or kidney\*) adj3 (condition\* or disease\* or disorder\* or fail\* or insufficien\*)).tw,kw. (205098)
- 159 (CKD or CKDs).tw,kw. (80787)
- 160 diabetes mellitus/ (704972)
- 161 exp insulin dependent diabetes mellitus/ (191892)
- 162 non insulin dependent diabetes mellitus/ (385694)
- 163 latent autoimmune diabetes in adults/ (376)
- 164 diabet\*.tw,kw. (1614950)
- 165 ("Type 1" or "Type I" or "Type 2" or "Type II" or ID or NID) adj DM).tw,kw. (12646)
- 166 (IDDM or NIDDM).tw,kw. (27515)
- 167 dyslipidemia/ (82310)
- 168 (dyslipidemi\* or dyslipoproteinemi\* or dyslipo-proteinemi\* or hyperlipemi\* or hyperlipid?emi\* or hyper-lipemi\* or hyper-lipid?emi\* or lipemi\* or lipid?emi\* or hypercholester?emi\* or hypercholester?emi\* or hypertriglyceridemi\* or hyper-triglyceridemi\*).tw,kw. (200456)
- 169 exp inflammatory bowel disease/ (238290)
- 170 (inflam\* adj1 (bowel\* or colon\*)).tw,kw. (137715)
- 171 IBD.tw,kw. (78120)
- 172 (Crohn or "Crohn's").tw,kw. (129757)

- 173 (ileitis adj2 (regional or terminal)).tw,kw. (1952)
- 174 (Ileocolitis or ileo-colitis).tw,kw. (1242)
- 175 ((proctocolitis or procto-colitis) adj2 idiopathic).tw,kw. (93)
- 176 ((colorectitis or proctocolitis or procto-colitis) adj2 (ulcer\* or mucosal)).tw,kw. (171)
- 177 colitis gravis.tw,kw. (11)
- 178 chronic obstructive lung disease/ (173601)
- 179 (chronic adj2 obstructi\* adj3 (pulmonary or airway\* or air way\* or lung or lungs or airflow\* or air flow\* or bronchitis or bronchopulmonar\* or broncho-pulmonar\*)).tw,kw. (136000)
- 180 (emphysema? adj3 (pulmonary or airway\* or air way\* or lung or lungs or airflow\* or air flow\* or centriacinar or centri-acinar or centrilobular or centri-lobular or panacinar or pan-acinar or panlobular or pan-lobular)).tw,kw. (21052)
- 181 (COPD or COAD).tw,kw. (136003)
- 182 exp cardiovascular disease/ (6804416)
- 183 ((artery or arteries or arterial or atrial\* or atrium\* or cardiac\* or cardio\* or cardiovascul\* or cardio-vascul\* or coronary or heart\* or myocard\* or ventricle\*) adj3 (arrest\* or aneurysm\* or arrhythmia\* or arrhythmia\* or disease\* or disorder\* or dysrhythmia\* or dysrhythmia\* or dysfunction\* or failure\* or fibrillation\* or ischemi\* or infarction\* or obstruct\* or occlu\* or rupture\* or stenosis or syndrom\* or thrombo\* or vasospas\* or vaso-spas\*)).tw,kw. (2662750)
- 184 (arterioscleros\* or arterio-scleros\* or atheroscleros\* or athero-scleros\*).tw,kw. (331070)
- 185 hypertens\*.tw,kw. (1143312)
- 186 ((elevated or high\*) adj2 blood pressure\*).tw,kw. (80499)
- 187 or/147-186 [ITEMIZED CHRONIC DISEASES] (19642008)
- 188 146 or 187 [CHRONIC DISEASES, INCLUDING NAMED CONDITIONS] (20175048)
- 189 ((emotional\* or mental\* or psychological\* or social\*) adj2 health\* adj3 (disorder\* or morbidit\* or comorbid\* or co-morbidit\* or problem\*)).tw,kw. (48743)
- 190 exp mood disorder/ (647316)
- 191 ((affective or mood) adj disorder?).tw,kw. (82561)
- 192 cyclothymia/ (1041)
- 193 ((cyclothymic or cyclo-thymic) adj (disorder? or personalit\*)).tw,kw. (289)
- 194 exp anxiety disorder/ (324405)
- 195 exp anxiety/ (303024)
- 196 (anxiety or anxieties or anxious\*).tw,kw. (494827)
- 197 GAD.tw,kw. (23192)
- 198 (hypervigilan\* or hyper-vigilan\* or nervous\*).tw,kw. (733406)
- 199 ((incessan\* or obsessive\* or persistan\* or intense\*) adj3 fear\*).tw,kw. (1083)
- 200 (agoraphobi\* or claustrophobi\* or homophobi\* or neophobi\* or xenophobi\*).tw,kw. (15157)
- 201 (neurocirculatory asthenia\* or cardiac neurosis or effort syndrome\* or hyperkinetic heart syndrome\*).tw,kw. (1416)
- 202 (neurotic disorder\* or neurosis or psychoneurosis or psycho-neurosis).tw,kw. (24072)
- 203 (obsessive-compulsive or anankastic personalit\* or compulsive personalit\* or obsessive personalit\* or hoarding or psychasthenia\*).tw,kw. (44330)
- 204 (panic disorder\* or (panic adj2 attack\*)).tw,kw. (26305)
- 205 (phobia or phobias or phobic).tw,kw. (28151)
- 206 (catastrophization? or catastrophie\* or catastrophizing).tw,kw. (8668)
- 207 attention deficit disorder/ (89404)
- 208 attention deficit\*.tw,kw. (68677)
- 209 (ADDH or ADHD).tw,kw. (62185)
- 210 ((hyperkinetic or hyper-kinetic) adj syndrome?).tw,kw. (905)

- 211 exp depression/ (600183)  
212 depress\*.tw,kw. (1116521)  
213 dysthym\*.tw,kw. (7464)  
214 (feel\* blue or blues).tw,kw. (4061)  
215 melanchol\*.tw,kw. (7472)  
216 (MDD and mental).tw,kw. (4396)  
217 PTSD.tw,kw. (57477)  
218 (stress disorder? adj3 (trauma\* or posttrauma\* or post-trauma\*)).tw,kw. (66525)  
219 (neuros#s adj3 (trauma\* or posttrauma\* or post-trauma\*)).tw,kw. (690)  
220 or/189-219 [MENTAL/MOOD DISORDERS - GENERAL AND NAMED] (2651384)  
221 188 and 220 [CHRONIC DISEASE & MENTAL HEALTH PROBLEMS] (708973)  
222 exp computer network/ (106780)  
223 internet/ (180650)  
224 web-based intervention/ (352)  
225 smartphone/ (16414)  
226 ((internet or online or web or web-based or web-site or website or www or cyber\* or smartphone\* or smart phone\* or iphone\* or i-phone\* or ipad or i-pad or ipads or i-pads) adj3 (care or deliver\* or healthcare or health care or consult\* or counsel\* or interven\* or monitor\* or psychiatr\* or rehab\* or service? or treat\* or therap\*)).tw,kw. (47924)  
227 ((internet or online or web or web-based or web-site or website or www or cyber\* or smartphone\* or smart phone\* or iphone\* or i-phone\* or ipad or i-pad or ipads or i-pads) adj3 (app or apps or application?)).tw,kw. (24398)  
228 (mobile adj3 (app or apps or application?)).tw,kw. (14549)  
229 ((technology-based or technology-facilitated) adj3 (care or healthcare or health care or interven\* or consult\* or counsel\* or monitor\* or psychiatr\* or rehab\* or treat\* or therap\*)).tw,kw. (1464)  
230 (digital\* adj3 (care or healthcare or health care or interven\* or consult\* or counsel\* or monitor\* or psychiatr\* or rehab\* or treat\* or therap\*)).tw,kw. (12381)  
231 (video\* adj3 (care or healthcare or health care or interven\* or consult\* or counsel\* or monitor\* or psychiatr\* or rehab\* or treat\* or therap\*)).tw,kw. (21785)  
232 (virtual\* adj3 (care or healthcare or health care or interven\* or consult\* or counsel\* or monitor\* or psychiatr\* or rehab\* or treat\* or therap\*)).tw,kw. (8752)  
233 (patient? adj2 (portal or portals)).tw,kw. (11948)  
234 ((health information or medical information or clinical information) adj3 (portal or portals)).tw,kw. (156)  
235 ((health data or medical data or clinical data) adj3 (portal or portals)).tw,kw. (67)  
236 health portal?.tw,kw. (322)  
237 e-mail/ (24709)  
238 (electronic mail\* or email\* or e-mail\*).tw,kw. (51262)  
239 telephone/ (50014)  
240 (telephon\* or tele-phon\* or phone or phoned or phones or phoning or answering service? or telefacsimile\* or tele-facsimile\* or FAX).tw,kw. (209337)  
241 television/ (30885)  
242 (televis\* or tele-vis\* or TV or TVs or videorecord\* or video-record\* or videotap\* or video tap\*).tw,kw. (116882)  
243 videoconferencing/ (5321)  
244 (videoconferenc\* or video-conference\* or videophon\* or video-phon\*).tw,kw. (6193)  
245 electronic health record/ (35864)  
246 electronic health record?.tw,kw. (39303)



- 247 electronic medical record/ (74370)  
248 electronic patient record/ (2304)  
249 (EHR or EHRs or EMR or EMRs or PHR or PHRs).tw,kw. (46430)  
250 hotline/ (3071)  
251 hotline?.tw,kw. (2776)  
252 telecommunication/ (30245)  
253 (telecommunicat\* or tele-communicat\*).tw,kw. (8768)  
254 exp Telemedicine/ (67951)  
255 (ehealth or e-health or mhealth or m-health or mobile health).tw,kw. (26439)  
256 (telecare or tele-care or teleconsult\* or tele-consult\* or telecounsel\* or tele-counsel\* or telehome\* or tele-home\* or telemed\* or tele-med\* or telemonitor\* or tele-monitor\* or telenurs\* or tele-nurs\* or telepsychiatr\* or tele-psychiatr\* or telerehab\* or tele-rehab\*).tw,kw. (40112)  
257 (remote\$2 adj3 (care or healthcare or health care or consult\* or counsel\* or interven\* or monitor\* or psychiatr\* or rehab\* or treat\* or therap\*).tw,kw. (17322)  
258 or/222-257 [DIGITAL HEALTH TECHNOLOGIES] (895464)  
259 221 and 258 [CHRONIC DISEASE & MENTAL HEALTH PROBLEMS - DIGITAL HEALTH TECHNOLOGIES] (16694)  
260 "systematic review"/ (377591)  
261 "systematic review (topic)"/ (24955)  
262 meta-analysis/ (304555)  
263 "meta analysis (topic)"/ (42125)  
264 (meta-analy\* or metanaly\* or metaanaly\* or met analy\* or integrative research or integrative review\* or integrative overview\* or research integration or research overview\* or collaborative review\*).tw,kw. (414401)  
265 (systematic review\* or systematic overview\* or evidence-based review\* or evidence-based overview\* or (evidence adj3 (review\* or overview\*)) or meta-review\* or meta-overview\* or meta-synthes\* or rapid review\* or "review of reviews" or umbrella review? or technology assessment\* or HTA or HTAs).tw,kw. (495920)  
266 biomedical technology assessment/ (24358)  
267 (cochrane or health technology assessment or evidence report or systematic reviews).jw. (47503)  
268 (network adj (MA or MAs)).tw,kw. (30)  
269 (NMA or NMAs or MTC or MTCs or MAIC or MAICs).tw,kw. (18036)  
270 indirect\* compar\*.tw,kw. (5663)  
271 (indirect treatment\* adj1 compar\*).tw,kw. (915)  
272 (mixed treatment\* adj1 compar\*).tw,kw. (1349)  
273 (multiple treatment\* adj1 compar\*).tw,kw. (394)  
274 (multi-treatment\* adj1 compar\*).tw,kw. (8)  
275 simultaneous\* compar\*.tw,kw. (2407)  
276 mixed comparison?.tw,kw. (74)  
277 or/260-276 [REVIEWS] (926988)  
278 259 and 277 [REVIEWS - CHRONIC DISEASE & MENTAL HEALTH PROBLEMS - DIGITAL HEALTH TECHNOLOGIES] (713)  
279 exp animal/ or exp animal experimentation/ or exp animal model/ or exp animal experiment/ or nonhuman/ or exp vertebrate/ (52856473)  
280 exp human/ or exp human experimentation/ or exp human experiment/ (40867893)  
281 279 not 280 (11990325)  
282 278 not 281 [ANIMAL-ONLY REMOVED] (711)  
283 limit 282 to yr="2010-current" (636)



284 283 use emczd [EMBASE RECORDS] (463)  
 285 143 or 284 [BOTH DATABASES] (641)  
 286 remove duplicates from 285 (489) [TOTAL UNIQUE RECORDS]  
 287 286 use ppez [MEDLINE UNIQUE RECORDS] (175)  
 288 286 use emczd [EMBASE UNIQUE RECORDS] (314)

\*\*\*\*\*

#### Cochrane Library

Database: EBM Reviews - Cochrane Database of Systematic Reviews <2005 to June 03, 2020>, EBM Reviews - Database of Abstracts of Reviews of Effects <1st Quarter 2016>, EBM Reviews - Health Technology Assessment <4th Quarter 2016>

Search Strategy:

-----

- 1 exp Chronic Disease/ (166)
- 2 ((chronic\* or longterm or long-term or longstanding or long-standing or ongoing or persisten\*) adj2 (comorbid\* or co-morbid\* or condition\* or disabilit\* or disease\* or disorder\* or ill or illness\* or morbidit\* or syndrom\* or symptom\*)).ti,ab,kw,tw. (5947)
- 3 1 or 2 [CHRONIC DISEASE - GENERAL] (5947)
- 4 exp Arthritis/ (253)
- 5 (arthriti\* or arthros#s or osteoarthriti\* or osteo-arthriti\* or osteoarthros#s or osteo-arthros#s or polyarthriti\* or poly-arthriti\* or spondylarthriti\* or spondyl-arthriti\*).ti,ab,kw,tw. (2243)
- 6 exp Asthma/ (105)
- 7 asthma\*.ti,ab,kw,tw. (1488)
- 8 Chronic Pain/ (24)
- 9 Pain, Intractable/ (11)
- 10 ((chronic\* or constant\* or continual\* or continuous\* or ceaseless\* or endless\* or incessant\* or interminabl\* or intractable or longterm or long-term or nonstop\* or non-stop\* or perpetual\* or persist\* or recur\* or refractory or sustained or relentless\* or unabat\* or unceasing or unending or uninterrupted\* or unrelenting or unrelieved or unremitt\*) adj3 (neuralgi\* or neuropath\* or pain\*)).ti,ab,kw,tw. (1912)
- 11 exp Neoplasms/ (2532)
- 12 (neoplas\* or cancer\* or tumour\* or tumor\* or carcinoma\* or malignan\* or metasta\* or oncolog\*).ti,ab,kw,tw. (13669)
- 13 (adenoma\* or adenocarcinoma\* or adeno-carcinoma\* or blastoma\* or carcinosarcoma\* or carcino-sarcoma\* or hematoma\* or hepatoblastoma\* or hepato-blastoma\* or leukemia\* or leukaemia\* or lymphoma\* or melanoma\* or mesenchymoma\* or mesothelioma\* or sarcoma\* or thymoma\*).ti,ab,kw,tw. (1492)
- 14 Renal Insufficiency, Chronic/ (13)
- 15 (chronic adj2 (renal or kidney\*) adj3 (condition\* or disease\* or disorder\* or fail\* or insufficien\*)).ti,ab,kw,tw. (764)
- 16 (CKD or CKDs).ti,ab,kw,tw. (158)
- 17 Diabetes Mellitus/ (137)
- 18 Diabetes Mellitus, Type 1/ (65)
- 19 Diabetes Mellitus, Type 2/ (118)
- 20 Latent Autoimmune Diabetes in Adults/ (0)
- 21 diabet\*.ti,ab,kw,tw. (5061)
- 22 ("Type 1" or "Type I" or "Type 2" or "Type II" or ID or NID) adj DM).ti,ab,kw,tw. (19)
- 23 (IDDM or NIDDM).ti,ab,kw,tw. (37)

- 24 exp Dyslipidemias/ (35)
- 25 (dyslipidemi\* or dyslipoproteinemi\* or dyslipo-proteinemi\* or hyperlipemi\* or hyperlipid?emi\* or hyper-lipemi\* or hyper-lipid?emi\* or lipemi\* or lipid?emi\* or hypercholester?emi\* or hypercholester?emi\* or hypertriglyceridemi\* or hyper-triglyceridemi\*).ti,ab,kw,tw. (469)
- 26 exp Inflammatory Bowel Diseases/ (62)
- 27 (inflam\* adj1 (bowel\* or colon\*).ti,ab,kw,tw. (424)
- 28 IBD.ti,ab,kw,tw. (180)
- 29 (Crohn or "Crohn's").ti,ab,kw,tw. (422)
- 30 (ileitis adj2 (regional or terminal)).ti,ab,kw,tw. (5)
- 31 (Ileocolitis or ileo-colitis).ti,ab,kw,tw. (10)
- 32 ((proctocolitis or procto-colitis) adj2 idiopathic).ti,ab,kw,tw. (0)
- 33 ((colorectitis or proctocolitis or procto-colitis) adj2 (ulcer\* or mucosal)).ti,ab,kw,tw. (9)
- 34 colitis gravis.ti,ab,kw,tw. (1)
- 35 exp Pulmonary Disease, Chronic Obstructive/ (112)
- 36 (chronic adj2 obstructi\* adj3 (pulmonary or airway\* or air way\* or lung or lungs or airflow\* or air flow\* or bronchitis or bronchopulmonar\* or broncho-pulmonar\*).ti,ab,kw,tw. (1020)
- 37 (emphysema? adj3 (pulmonary or airway\* or air way\* or lung or lungs or airflow\* or air flow\* or centriacinar or centri-acinar or centrilobular or centri-lobular or panacinar or pan-acinar or panlobular or pan-lobular)).ti,ab,kw,tw. (120)
- 38 (COPD or COAD).ti,ab,kw,tw. (658)
- 39 exp Cardiovascular Diseases/ (1432)
- 40 ((artery or arteries or arterial or atrial\* or atrium\* or cardiac\* or cardio\* or cardiovascul\* or cardiovascular\* or coronary or heart\* or myocard\* or ventricle\*) adj3 (arrest\* or aneurysm\* or arrhythmia\* or arrhythmia\* or disease\* or disorder\* or dysrhythmia\* or dysrhythmia\* or dysfunction\* or failure\* or fibrillation\* or ischemi\* or infarction\* or obstruct\* or occlu\* or rupture\* or stenosis or syndrom\* or thrombo\* or vasospas\* or vaso-spas\*).ti,ab,kw,tw. (8162)
- 41 (arterioscleros\* or arterio-scleros\* or atheroscleros\* or athero-scleros\*).ti,ab,kw,tw. (424)
- 42 hypertens\*.ti,ab,kw,tw. (3258)
- 43 ((elevated or high\*) adj2 blood pressure\*).ti,ab,kw,tw. (556)
- 44 or/4-43 [ITEMIZED CHRONIC DISEASES] (28740)
- 45 3 or 44 [CHRONIC DISEASES, INCLUDING NAMED CONDITIONS] (30275)
- 46 ((emotional\* or mental\* or psychological\* or social\*) adj2 health\* adj3 (disorder\* or morbidit\* or comorbid\* or co-morbidit\* or problem\*).ti,ab,kw,tw. (502)
- 47 Mood Disorders/ (11)
- 48 ((affective or mood) adj disorder?).ti,ab,kw,tw. (594)
- 49 Cyclothymic Disorder/ (0)
- 50 ((cyclothymic or cyclo-thymic) adj (disorder? or personalit\*).ti,ab,kw,tw. (64)
- 51 exp Anxiety Disorders/ (70)
- 52 exp Anxiety/ (22)
- 53 (anxiety or anxieties or anxious\*).ti,ab,kw,tw. (3119)
- 54 GAD.ti,ab,kw,tw. (86)
- 55 (hypervigilan\* or hyper-vigilan\* or nervous\*).ti,ab,kw,tw. (1930)
- 56 ((incessan\* or obsessive\* or persistan\* or intense\*) adj3 fear\*).ti,ab,kw,tw. (14)
- 57 (agoraphobi\* or claustrophobi\* or homophobi\* or neophobi\* or xenophobi\*).ti,ab,kw,tw. (184)
- 58 (neurocirculatory asthenia\* or cardiac neurosis or effort syndrome\* or hyperkinetic heart syndrome\*).ti,ab,kw,tw. (60)
- 59 (neurotic disorder\* or neurosis or psychoneurosis or psycho-neurosis).ti,ab,kw,tw. (321)

- 60 (obsessive-compulsive or anankastic personalit\* or compulsive personalit\* or obsessive personalit\* or hoarding or psychastheni\*).ti,ab,kw,tw. (280)
- 61 (panic disorder\* or (panic adj2 attack\*)).ti,ab,kw,tw. (239)
- 62 (phobia or phobias or phobic).ti,ab,kw,tw. (282)
- 63 (catastroph#ation? or catastroph#e\* or catastroph#ing).ti,ab,kw,tw. (35)
- 64 Attention Deficit Disorder with Hyperactivity/ (54)
- 65 Attention Deficit Disorder with Hyperactivity/ (54)
- 66 (ADDH or ADHD).ti,ab,kw,tw. (223)
- 67 ((hyperkinetic or hyper-kinetic) adj syndrome?).ti,ab,kw,tw. (3)
- 68 exp Depressive Disorder/ (97)
- 69 Depression/ (73)
- 70 depress\*.ti,ab,kw,tw. (4605)
- 71 dysthym\*.ti,ab,kw,tw. (220)
- 72 (feel\* blue or blues).ti,ab,kw,tw. (28)
- 73 melanchol\*.ti,ab,kw,tw. (44)
- 74 (MDD and mental).ti,ab,kw,tw. (54)
- 75 Stress Disorders, Traumatic/ (2)
- 76 Stress Disorders, Post-Traumatic/ (28)
- 77 PTSD.ti,ab,kw,tw. (211)
- 78 (stress disorder? adj3 (trauma\* or posttrauma\* or post-trauma\*)).ti,ab,kw,tw. (395)
- 79 (neuros#s adj3 (trauma\* or posttrauma\* or post-trauma\*)).ti,ab,kw,tw. (9)
- 80 or/46-79 [MENTAL/MOOD DISORDERS - GENERAL AND NAMED] (7124)
- 81 45 and 80 [CHRONIC DISEASE & MENTAL HEALTH PROBLEMS] (4063)
- 82 Computer Communication Networks/ (7)
- 83 Local Area Networks/ (0)
- 84 Internet/ (27)
- 85 Internet-Based Intervention/ (0)
- 86 ((internet or online or web or web-based or web-site or website or www or cyber\* or smartphone\* or smart phone\* or iphone\* or i-phone\* or ipad or i-pad or ipads or i-pads) adj3 (care or deliver\* or healthcare or health care or consult\* or counsel\* or interven\* or monitor\* or psychiatr\* or rehab\* or service? or treat\* or therap\*)).ti,ab,kw,tw. (592)
- 87 Smartphone/ (0)
- 88 ((internet or online or web or web-based or web-site or website or www or cyber\* or smartphone\* or smart phone\* or iphone\* or i-phone\* or ipad or i-pad or ipads or i-pads) adj3 (app or apps or application?)).ti,ab,kw,tw. (108)
- 89 (mobile adj3 (app or apps or application?)).ti,ab,kw,tw. (81)
- 90 (digital\* adj3 (care or healthcare or health care or interven\* or consult\* or counsel\* or monitor\* or psychiatr\* or rehab\* or treat\* or therap\*)).ti,ab,kw,tw. (64)
- 91 ((technology-based or technology-facilitated) adj3 (care or healthcare or health care or interven\* or consult\* or counsel\* or monitor\* or psychiatr\* or rehab\* or treat\* or therap\*)).ti,ab,kw,tw. (43)
- 92 (video\* adj3 (care or healthcare or health care or interven\* or consult\* or counsel\* or monitor\* or psychiatr\* or rehab\* or treat\* or therap\*)).ti,ab,kw,tw. (217)
- 93 (virtual\* adj3 (care or healthcare or health care or interven\* or consult\* or counsel\* or monitor\* or psychiatr\* or rehab\* or treat\* or therap\*)).ti,ab,kw,tw. (88)
- 94 Patient Portals/ (0)
- 95 (patient? adj2 (portal or portals)).ti,ab,kw,tw. (29)
- 96 ((health information or medical information or clinical information) adj3 (portal or portals)).ti,ab,kw,tw. (0)

- 97 ((health data or medical data or clinical data) adj3 (portal or portals)).ti,ab,kw,tw. (0)
- 98 health portal?.ti,ab,kw,tw. (1)
- 99 Electronic Mail/ (0)
- 100 (electronic mail\* or email\* or e-mail\*).ti,ab,kw,tw. (2207)
- 101 exp Telephone/ (21)
- 102 (telephon\* or tele-phon\* or phone or phoned or phones or phoning or answering service? or telefacsimile\* or tele-facsimile\* or FAX).ti,ab,kw,tw. (3243)
- 103 exp Television/ (3)
- 104 (televis\* or tele-vis\* or TV or TVs or videorecord\* or video-record\* or videotap\* or videotap\*).ti,ab,kw,tw. (510)
- 105 Videoconferencing/ (2)
- 106 (videoconferenc\* or video-conference\* or videophon\* or video-phon\*).ti,ab,kw,tw. (81)
- 107 Electronic Health Records/ (5)
- 108 electronic health record?.ti,ab,kw,tw. (64)
- 109 (EHR or EHRs or EMR or EMRs or PHR or PHRs).ti,ab,kw,tw. (38)
- 110 Hotlines/ (1)
- 111 hotline?.ti,ab,kw,tw. (44)
- 112 Telecommunications/ (6)
- 113 (telecommunicat\* or tele-communicat\*).ti,ab,kw,tw. (107)
- 114 exp Telemedicine/ (124)
- 115 Telenursing/ (1)
- 116 (ehealth or e-health or mhealth or m-health or mobile health).ti,ab,kw,tw. (147)
- 117 (telecare or tele-care or teleconsult\* or tele-consult\* or telecounsel\* or tele-counsel\* or telehome\* or tele-home\* or telemed\* or tele-med\* or telemonitor\* or tele-monitor\* or telenurs\* or tele-nurs\* or telepsychiatr\* or tele-psychiatr\* or telerehab\* or tele-rehab\*).ti,ab,kw,tw. (444)
- 118 (remote\$2 adj3 (care or healthcare or health care or consult\* or counsel\* or interven\* or monitor\* or psychiatr\* or rehab\* or treat\* or therap\*)).ti,ab,kw,tw. (206)
- 119 or/82-118 [DIGITAL HEALTH TECHNOLOGIES] (5328)
- 120 81 and 119 [CHRONIC DISEASE & MENTAL HEALTH PROBLEMS - DIGITAL HEALTH TECHNOLOGIES] (1688)
- 121 limit 120 to yr="2010-current" [Limit not valid in DARE; records were retained] (1449)
- 122 remove duplicates from 121 (1449) [TOTAL UNIQUE RECORDS]
- 123 122 use coch [CDSR UNIQUE RECORDS] (1362)
- 124 122 use dare [DARE UNIQUE RECORDS] (82)
- 125 122 use clhta [HTA UNIQUE RECORDS] (5)

\*\*\*\*\*

#### CINAHL

| #    | Query         | Limiters/Expanders                                                                      | Last Run Via                                                                        | Results |
|------|---------------|-----------------------------------------------------------------------------------------|-------------------------------------------------------------------------------------|---------|
| S125 | S110 AND S123 | Limiters - Published<br>Date: 20100101-<br>20201231<br>Search modes -<br>Boolean/Phrase | Interface -<br>EBSCOhost<br>Research<br>Databases<br>Search<br>Screen -<br>Advanced | 164     |

|      |                                                                                              |                               |                                                                                                                |         |
|------|----------------------------------------------------------------------------------------------|-------------------------------|----------------------------------------------------------------------------------------------------------------|---------|
|      |                                                                                              |                               | Search Database - CINAHL Plus with Full Text                                                                   |         |
| S124 | S110 AND S123                                                                                | Search modes - Boolean/Phrase | Interface - EBSCOhost Research Databases Search Screen - Advanced Search Database - CINAHL Plus with Full Text | 188     |
| S123 | S111 OR S112 OR S113 OR S114 OR S115 OR S116 OR S117 OR S118 OR S119 OR S120 OR S121 OR S122 | Search modes - Boolean/Phrase | Interface - EBSCOhost Research Databases Search Screen - Advanced Search Database - CINAHL Plus with Full Text | 200,742 |
| S122 | TI simultaneous* W0 compar* OR AB simultaneous* W0 compar*                                   | Search modes - Boolean/Phrase | Interface - EBSCOhost Research Databases Search Screen - Advanced Search Database - CINAHL Plus with Full Text | 145     |
| S121 | TI (multi W0 treatment*) N1 compar* OR AB (multi W0 treatment*) N1 compar*                   | Search modes - Boolean/Phrase | Interface - EBSCOhost Research Databases                                                                       | 2       |

|      |                                                                                     |                                  |                                                                                                                                                 |     |
|------|-------------------------------------------------------------------------------------|----------------------------------|-------------------------------------------------------------------------------------------------------------------------------------------------|-----|
|      |                                                                                     |                                  | Search<br>Screen -<br>Advanced<br>Search<br>Database -<br>CINAHL Plus<br>with Full<br>Text                                                      |     |
| S120 | TI (multiple W0 treatment*) N1 compar* OR AB<br>(multiple W0 treatment*) N1 compar* | Search modes -<br>Boolean/Phrase | Interface -<br>EBSCOhost<br>Research<br>Databases<br>Search<br>Screen -<br>Advanced<br>Search<br>Database -<br>CINAHL Plus<br>with Full<br>Text | 75  |
| S119 | TI (mixed W0 treatment*) N1 compar* OR AB<br>(mixed W0 treatment*) N1 compar*       | Search modes -<br>Boolean/Phrase | Interface -<br>EBSCOhost<br>Research<br>Databases<br>Search<br>Screen -<br>Advanced<br>Search<br>Database -<br>CINAHL Plus<br>with Full<br>Text | 229 |
| S118 | TI (indirect W0 treatment*) N1 compar* OR AB<br>(indirect W0 treatment*) N1 compar* | Search modes -<br>Boolean/Phrase | Interface -<br>EBSCOhost<br>Research<br>Databases<br>Search<br>Screen -<br>Advanced<br>Search<br>Database -<br>CINAHL Plus<br>with Full<br>Text | 109 |

|      |                                                                                                                                                                                                                                                                                                                                                                                                                                                       |                               |                                                                                                                |         |
|------|-------------------------------------------------------------------------------------------------------------------------------------------------------------------------------------------------------------------------------------------------------------------------------------------------------------------------------------------------------------------------------------------------------------------------------------------------------|-------------------------------|----------------------------------------------------------------------------------------------------------------|---------|
| S117 | TI indirect* W0 compar* OR AB indirect* W0 compar*                                                                                                                                                                                                                                                                                                                                                                                                    | Search modes - Boolean/Phrase | Interface - EBSCOhost Research Databases Search Screen - Advanced Search Database - CINAHL Plus with Full Text | 818     |
| S116 | TI ( NMA or NMAs or MTC or MTCs or MAIC or MAICs ) OR AB ( NMA or NMAs or MTC or MTCs or MAIC or MAICs )                                                                                                                                                                                                                                                                                                                                              | Search modes - Boolean/Phrase | Interface - EBSCOhost Research Databases Search Screen - Advanced Search Database - CINAHL Plus with Full Text | 1,002   |
| S115 | TI ( network W0 (MA or MAs) ) OR AB ( network W0 (MA or MAs) )                                                                                                                                                                                                                                                                                                                                                                                        | Search modes - Boolean/Phrase | Interface - EBSCOhost Research Databases Search Screen - Advanced Search Database - CINAHL Plus with Full Text | 4       |
| S114 | TI ( "systematic review" or "systematic reviews" or "systematic overview" or "systematic overviews" or "evidence-based review" or "evidence-based reviews" or "evidence-based overview" or "evidence-based overviews" or (evidence N3 (review* or overview*)) or "meta-review" or "meta-reviews" or "meta-overview" or "meta-overviews" or (meta W0 synthes*) or "rapid review" or "rapid reviews" or "review of reviews" or (umbrella W0 review#) or | Search modes - Boolean/Phrase | Interface - EBSCOhost Research Databases Search Screen - Advanced Search Database - CINAHL Plus                | 121,130 |



|      |                                                                                                                                                                                                                                                                                                                                                                                                                                                                                                                                                       |                               |                                                                                                                |        |
|------|-------------------------------------------------------------------------------------------------------------------------------------------------------------------------------------------------------------------------------------------------------------------------------------------------------------------------------------------------------------------------------------------------------------------------------------------------------------------------------------------------------------------------------------------------------|-------------------------------|----------------------------------------------------------------------------------------------------------------|--------|
|      | (technology W0 assessment*) or HTA or HTAs )<br>OR AB ( "systematic review" or "systematic reviews" or "systematic overview" or "systematic overviews" or "evidence-based review" or "evidence-based reviews" or "evidence-based overview" or "evidence-based overviews" or (evidence N3 (review* or overview*)) or "meta-review" or "meta-reviews" or "meta-overview" or "meta-overviews" or (meta W0 synthes*) or "rapid review" or "rapid reviews" or "review of reviews" or (umbrella W0 review#) or (technology W0 assessment*) or HTA or HTAs ) |                               | with Full Text                                                                                                 |        |
| S113 | TI ( (meta W0 analy* or metanaly* or metaanaly* or (met W0 analy*) or "integrative research" or (integrative W0 review*) or (integrative W0 overview*) or "research integration" or (research W0 overview*) or (collaborative W0 review*) ) OR AB ( (meta W0 analy* or metanaly* or metaanaly* or (met W0 analy*) or "integrative research" or (integrative W0 review*) or (integrative W0 overview*) or "research integration" or (research W0 overview*) or (collaborative W0 review*) )                                                            | Search modes - Boolean/Phrase | Interface - EBSCOhost Research Databases Search Screen - Advanced Search Database - CINAHL Plus with Full Text | 77,959 |
| S112 | (MH "Meta Analysis") OR (MH "Meta Synthesis")                                                                                                                                                                                                                                                                                                                                                                                                                                                                                                         | Search modes - Boolean/Phrase | Interface - EBSCOhost Research Databases Search Screen - Advanced Search Database - CINAHL Plus with Full Text | 52,660 |
| S111 | MH "Systematic Review"                                                                                                                                                                                                                                                                                                                                                                                                                                                                                                                                | Search modes - Boolean/Phrase | Interface - EBSCOhost Research Databases Search Screen - Advanced Search Database -                            | 95,081 |

|      |                                                                                                                                                                                                                                                                                                                |                               |                                                                                                                |         |
|------|----------------------------------------------------------------------------------------------------------------------------------------------------------------------------------------------------------------------------------------------------------------------------------------------------------------|-------------------------------|----------------------------------------------------------------------------------------------------------------|---------|
|      |                                                                                                                                                                                                                                                                                                                |                               | CINAHL Plus with Full Text                                                                                     |         |
| S110 | S72 AND S109                                                                                                                                                                                                                                                                                                   | Search modes - Boolean/Phrase | Interface - EBSCOhost Research Databases Search Screen - Advanced Search Database - CINAHL Plus with Full Text | 3,893   |
| S109 | S73 OR S74 OR S75 OR S76 OR S77 OR S78 OR S79 OR S80 OR S81 OR S82 OR S83 OR S84 OR S85 OR S86 OR S87 OR S88 OR S89 OR S90 OR S91 OR S92 OR S93 OR S94 OR S95 OR S96 OR S97 OR S98 OR S99 OR S100 OR S101 OR S102 OR S103 OR S104 OR S105 OR S106 OR S107 OR S108                                              | Search modes - Boolean/Phrase | Interface - EBSCOhost Research Databases Search Screen - Advanced Search Database - CINAHL Plus with Full Text | 335,223 |
| S108 | TI ( remote* N3 (care or healthcare or "health care" or consult* or counsel* or interven* or monitor* or psychiatr* or rehab* or treat* or therap*) ) OR AB ( remote* N3 (care or healthcare or "health care" or consult* or counsel* or interven* or monitor* or psychiatr* or rehab* or treat* or therap*) ) | Search modes - Boolean/Phrase | Interface - EBSCOhost Research Databases Search Screen - Advanced Search Database - CINAHL Plus with Full Text | 3,227   |
| S107 | TI ( telecare or "tele-care" or teleconsult* or (tele W0 consult*) or telecounsel* or (tele W0 counsel*) or telehome* or (tele W0 home*) or telemed* or (tele W0 med*) or telemonitor* or (tele W0 monitor*) or telenurs* or (tele W0 nurs*) or telepsychiatr* or (tele W0 psychiatr*)                         | Search modes - Boolean/Phrase | Interface - EBSCOhost Research Databases Search Screen -                                                       | 8,057   |

|      |                                                                                                                                                                                                                                                                                                                                                                 |                               |                                                                                                                |        |
|------|-----------------------------------------------------------------------------------------------------------------------------------------------------------------------------------------------------------------------------------------------------------------------------------------------------------------------------------------------------------------|-------------------------------|----------------------------------------------------------------------------------------------------------------|--------|
|      | or telerehab* or (tele W0 rehab* ) OR AB ( telecare or "tele-care" or teleconsult* or (tele W0 consult*) or telecounsel* or (tele W0 counsel*) or telehome* or (tele W0 home*) or telemed* or (tele W0 med*) or telemonitor* or (tele W0 monitor*) or telenurs* or (tele W0 nurs*) or telepsychiatr* or (tele W0 psychiatr*) or telerehab* or (tele W0 rehab* ) |                               | Advanced Search Database - CINAHL Plus with Full Text                                                          |        |
| S106 | TI ( ehealth or "e-health" or mhealth or "m-health" or mobile health ) OR AB ( ehealth or "e-health" or mhealth or "m-health" or mobile health )                                                                                                                                                                                                                | Search modes - Boolean/Phrase | Interface - EBSCOhost Research Databases Search Screen - Advanced Search Database - CINAHL Plus with Full Text | 6,246  |
| S105 | (MH "Telenursing")                                                                                                                                                                                                                                                                                                                                              | Search modes - Boolean/Phrase | Interface - EBSCOhost Research Databases Search Screen - Advanced Search Database - CINAHL Plus with Full Text | 2,178  |
| S104 | (MH "Telemedicine+") OR (MH "Telepsychiatry")                                                                                                                                                                                                                                                                                                                   | Search modes - Boolean/Phrase | Interface - EBSCOhost Research Databases Search Screen - Advanced Search Database - CINAHL Plus with Full Text | 14,054 |

|      |                                                                                                    |                               |                                                                                                                |       |
|------|----------------------------------------------------------------------------------------------------|-------------------------------|----------------------------------------------------------------------------------------------------------------|-------|
| S103 | TI ( telecommunicat* or (tele W0 communicat* ) OR AB ( telecommunicat* or (tele W0 communicat* ) ) | Search modes - Boolean/Phrase | Interface - EBSCOhost Research Databases Search Screen - Advanced Search Database - CINAHL Plus with Full Text | 1,110 |
| S102 | (MH "Telecommunications")                                                                          | Search modes - Boolean/Phrase | Interface - EBSCOhost Research Databases Search Screen - Advanced Search Database - CINAHL Plus with Full Text | 2,431 |
| S101 | TI hotline# OR AB hotline#                                                                         | Search modes - Boolean/Phrase | Interface - EBSCOhost Research Databases Search Screen - Advanced Search Database - CINAHL Plus with Full Text | 813   |
| S100 | (MH "Telephone Information Services")                                                              | Search modes - Boolean/Phrase | Interface - EBSCOhost Research Databases Search Screen - Advanced Search Database - CINAHL Plus                | 3,343 |

|     |                                                                                                                                                                        |                               | with Full Text                                                                                                 |        |
|-----|------------------------------------------------------------------------------------------------------------------------------------------------------------------------|-------------------------------|----------------------------------------------------------------------------------------------------------------|--------|
| S99 | TI ( EHR or EHRs or EMR or EMRs or PHR or PHRs ) OR AB ( EHR or EHRs or EMR or EMRs or PHR or PHRs )                                                                   | Search modes - Boolean/Phrase | Interface - EBSCOhost Research Databases Search Screen - Advanced Search Database - CINAHL Plus with Full Text | 11,465 |
| S98 | TI ( "electronic health record" or "electronic health records" ) OR AB ( "electronic health record" or "electronic health records" )                                   | Search modes - Boolean/Phrase | Interface - EBSCOhost Research Databases Search Screen - Advanced Search Database - CINAHL Plus with Full Text | 11,666 |
| S97 | MH "Electronic Health Records"                                                                                                                                         | Search modes - Boolean/Phrase | Interface - EBSCOhost Research Databases Search Screen - Advanced Search Database - CINAHL Plus with Full Text | 26,377 |
| S96 | TI ( videoconferenc* or (video W0 conferenc*) or videophon* or (video W0 phon*) ) OR AB ( videoconferenc* or (video W0 conferenc*) or videophon* or (video W0 phon*) ) | Search modes - Boolean/Phrase | Interface - EBSCOhost Research Databases Search Screen - Advanced                                              | 1,879  |

|     |                                                                                                                                                                                                                                                |                               |                                                                                                                |        |
|-----|------------------------------------------------------------------------------------------------------------------------------------------------------------------------------------------------------------------------------------------------|-------------------------------|----------------------------------------------------------------------------------------------------------------|--------|
|     |                                                                                                                                                                                                                                                |                               | Search Database - CINAHL Plus with Full Text                                                                   |        |
| S95 | (MH "Videoconferencing+")                                                                                                                                                                                                                      | Search modes - Boolean/Phrase | Interface - EBSCOhost Research Databases Search Screen - Advanced Search Database - CINAHL Plus with Full Text | 3,141  |
| S94 | TI ( televis* or (tele W0 vis*) or TV or TVs or videorecord* or (video W0 record*) or videotap* or (video W0 tap*). ) OR AB ( televis* or (tele W0 vis*) or TV or TVs or videorecord* or (video W0 record*) or videotap* or (video W0 tap*). ) | Search modes - Boolean/Phrase | Interface - EBSCOhost Research Databases Search Screen - Advanced Search Database - CINAHL Plus with Full Text | 21,412 |
| S93 | (MH "Television") OR (MH "Videorecording+")                                                                                                                                                                                                    | Search modes - Boolean/Phrase | Interface - EBSCOhost Research Databases Search Screen - Advanced Search Database - CINAHL Plus with Full Text | 43,241 |
| S92 | TI ( telephon* or (tele W0 phon*) or phone or phoned or phones or phoning or "answering service" or "answering services" or telefacsimile* or "tele-facsimile" or "tele-                                                                       | Search modes - Boolean/Phrase | Interface - EBSCOhost Research Databases                                                                       | 46,130 |

|     |                                                                                                                                                                                                                      |                               |                                                                                                                |        |
|-----|----------------------------------------------------------------------------------------------------------------------------------------------------------------------------------------------------------------------|-------------------------------|----------------------------------------------------------------------------------------------------------------|--------|
|     | facsimiles" or FAX ) OR AB ( telephon* or (tele W0 phon*) or phone or phoned or phones or phoning or "answering service" or "answering services" or telefacsimile* or "tele-facsimile" or "tele-facsimiles" or FAX ) |                               | Search Screen - Advanced Search Database - CINAHL Plus with Full Text                                          |        |
| S91 | (MH "Telephone+")                                                                                                                                                                                                    | Search modes - Boolean/Phrase | Interface - EBSCOhost Research Databases Search Screen - Advanced Search Database - CINAHL Plus with Full Text | 25,218 |
| S90 | TI ( (electronic W0 mail*) or email* or (e W0 mail*) ) OR AB ( (electronic W0 mail*) or email* or (e W0 mail*) )                                                                                                     | Search modes - Boolean/Phrase | Interface - EBSCOhost Research Databases Search Screen - Advanced Search Database - CINAHL Plus with Full Text | 11,502 |
| S89 | (MH "Email")                                                                                                                                                                                                         | Search modes - Boolean/Phrase | Interface - EBSCOhost Research Databases Search Screen - Advanced Search Database - CINAHL Plus with Full Text | 6,941  |



|     |                                                                                                                                                                                                                  |                               |                                                                                                                |       |
|-----|------------------------------------------------------------------------------------------------------------------------------------------------------------------------------------------------------------------|-------------------------------|----------------------------------------------------------------------------------------------------------------|-------|
| S88 | TI ( "health portal" or "health portals" ) OR AB ( "health portal" or "health portals" )                                                                                                                         | Search modes - Boolean/Phrase | Interface - EBSCOhost Research Databases Search Screen - Advanced Search Database - CINAHL Plus with Full Text | 84    |
| S87 | TI ( "health data" or "medical data" or "clinical data" ) N3 (portal or portals ) OR AB ( "health data" or "medical data" or "clinical data" ) N3 (portal or portals )                                           | Search modes - Boolean/Phrase | Interface - EBSCOhost Research Databases Search Screen - Advanced Search Database - CINAHL Plus with Full Text | 14    |
| S86 | TI ( "health information" or "medical information" or "clinical information" ) N3 (portal or portals ) OR AB ( "health information" or "medical information" or "clinical information" ) N3 (portal or portals ) | Search modes - Boolean/Phrase | Interface - EBSCOhost Research Databases Search Screen - Advanced Search Database - CINAHL Plus with Full Text | 67    |
| S85 | TI ( patient# N2 (portal or portals ) OR AB ( patient# N2 (portal or portals )                                                                                                                                   | Search modes - Boolean/Phrase | Interface - EBSCOhost Research Databases Search Screen - Advanced Search Database - CINAHL Plus                | 1,431 |

|     |                                                                                                                                                                                                                                                                                                                              |                               | with Full Text                                                                                                 |       |
|-----|------------------------------------------------------------------------------------------------------------------------------------------------------------------------------------------------------------------------------------------------------------------------------------------------------------------------------|-------------------------------|----------------------------------------------------------------------------------------------------------------|-------|
| S84 | (MH "Patient Portals")                                                                                                                                                                                                                                                                                                       | Search modes - Boolean/Phrase | Interface - EBSCOhost Research Databases Search Screen - Advanced Search Database - CINAHL Plus with Full Text | 88    |
| S83 | TI ( virtual* N3 (care or healthcare or "health care" or interven* or consult* or counsel* or monitor* or psychiatr* or rehab* or treat* or therap* ) ) OR AB ( virtual* N3 (care or healthcare or "health care" or interven* or consult* or counsel* or monitor* or psychiatr* or rehab* or treat* or therap* ) )           | Search modes - Boolean/Phrase | Interface - EBSCOhost Research Databases Search Screen - Advanced Search Database - CINAHL Plus with Full Text | 2,160 |
| S82 | TI ( video* N3 (care or healthcare or "health care" or interven* or consult* or counsel* or monitor* or psychiatr* or rehab* or treat* or therap* ) ) OR AB ( video* N3 (care or healthcare or "health care" or interven* or consult* or counsel* or monitor* or psychiatr* or rehab* or treat* or therap* ) )               | Search modes - Boolean/Phrase | Interface - EBSCOhost Research Databases Search Screen - Advanced Search Database - CINAHL Plus with Full Text | 4,419 |
| S81 | TI ( ("technology-based" or "technology-facilitated") N3 (care or healthcare or "health care" or interven* or consult* or counsel* or monitor* or psychiatr* or rehab* or treat* or therap* ) ) OR AB ( ("technology-based" or "technology-facilitated") N3 (care or healthcare or "health care" or interven* or consult* or | Search modes - Boolean/Phrase | Interface - EBSCOhost Research Databases Search Screen - Advanced                                              | 461   |

|     |                                                                                                                                                                                                                                                                                                                                                                                                                                                                                                    |                               |                                                                                                                |       |
|-----|----------------------------------------------------------------------------------------------------------------------------------------------------------------------------------------------------------------------------------------------------------------------------------------------------------------------------------------------------------------------------------------------------------------------------------------------------------------------------------------------------|-------------------------------|----------------------------------------------------------------------------------------------------------------|-------|
|     | counsel* or monitor* or psychiatr* or rehab* or treat* or therap* ) )                                                                                                                                                                                                                                                                                                                                                                                                                              |                               | Search Database - CINAHL Plus with Full Text                                                                   |       |
| S80 | TI ( digital* N3 (care or healthcare or "health care" or interven* or consult* or counsel* or monitor* or psychiatr* or rehab* or treat* or therap* ) ) OR AB ( digital* N3 (care or healthcare or "health care" or interven* or consult* or counsel* or monitor* or psychiatr* or rehab* or treat* or therap* ) )                                                                                                                                                                                 | Search modes - Boolean/Phrase | Interface - EBSCOhost Research Databases Search Screen - Advanced Search Database - CINAHL Plus with Full Text | 2,177 |
| S79 | TI ( mobile N3 (app or apps or application#) ) OR AB ( mobile N3 (app or apps or application#) )                                                                                                                                                                                                                                                                                                                                                                                                   | Search modes - Boolean/Phrase | Interface - EBSCOhost Research Databases Search Screen - Advanced Search Database - CINAHL Plus with Full Text | 4,366 |
| S78 | TI ( (internet* or online or web or "web-based" or "web-site" or website or www or cyber* or smartphone* or (smart W0 phone*) or iphone* or "i-phone" or "i-phones" or ipad or "i-pad" or ipads or "i-pads") N3 (app or apps or application#) ) OR AB ( (internet* or online or web or "web-based" or "web-site" or website or www or cyber* or smartphone* or (smart W0 phone*) or iphone* or "i-phone" or "i-phones" or ipad or "i-pad" or ipads or "i-pads") N3 (app or apps or application#) ) | Search modes - Boolean/Phrase | Interface - EBSCOhost Research Databases Search Screen - Advanced Search Database - CINAHL Plus with Full Text | 5,284 |
| S77 | (MH "Smartphone")                                                                                                                                                                                                                                                                                                                                                                                                                                                                                  | Search modes - Boolean/Phrase | Interface - EBSCOhost Research Databases                                                                       | 2,732 |

|     |                                                                                                                                                                                                                                                                                                                                                                                                                                                                                                                                                                                                                                                                                                                                                                |                                  |                                                                                                                                                 |         |
|-----|----------------------------------------------------------------------------------------------------------------------------------------------------------------------------------------------------------------------------------------------------------------------------------------------------------------------------------------------------------------------------------------------------------------------------------------------------------------------------------------------------------------------------------------------------------------------------------------------------------------------------------------------------------------------------------------------------------------------------------------------------------------|----------------------------------|-------------------------------------------------------------------------------------------------------------------------------------------------|---------|
|     |                                                                                                                                                                                                                                                                                                                                                                                                                                                                                                                                                                                                                                                                                                                                                                |                                  | Search<br>Screen -<br>Advanced<br>Search<br>Database -<br>CINAHL Plus<br>with Full<br>Text                                                      |         |
| S76 | TI ( (internet* or online or web or "web-based" or "web-site" or website or www or cyber* or smartphone* or (smart W0 phone*) or iphone* or "i-phone" or "i-phones" or ipad or "i-pad" or ipads or "i-pads") N3 (care or deliver* or healthcare or "health care" or consult* or counsel* or interven* or monitor* or psychiatr* or rehab* or service# or treat* or therap* ) OR AB ( (internet* or online or web or "web-based" or "web-site" or website or www or cyber* or smartphone* or (smart W0 phone*) or iphone* or "i-phone" or "i-phones" or ipad or "i-pad" or ipads or "i-pads") N3 (care or deliver* or healthcare or "health care" or consult* or counsel* or interven* or monitor* or psychiatr* or rehab* or service# or treat* or therap* ) ) | Search modes -<br>Boolean/Phrase | Interface -<br>EBSCOhost<br>Research<br>Databases<br>Search<br>Screen -<br>Advanced<br>Search<br>Database -<br>CINAHL Plus<br>with Full<br>Text | 16,618  |
| S75 | (MH "Internet") OR (MH "World Wide Web+")                                                                                                                                                                                                                                                                                                                                                                                                                                                                                                                                                                                                                                                                                                                      | Search modes -<br>Boolean/Phrase | Interface -<br>EBSCOhost<br>Research<br>Databases<br>Search<br>Screen -<br>Advanced<br>Search<br>Database -<br>CINAHL Plus<br>with Full<br>Text | 142,133 |
| S74 | (MH "Electronic Bulletin Boards+")                                                                                                                                                                                                                                                                                                                                                                                                                                                                                                                                                                                                                                                                                                                             | Search modes -<br>Boolean/Phrase | Interface -<br>EBSCOhost<br>Research<br>Databases<br>Search<br>Screen -<br>Advanced<br>Search<br>Database -<br>CINAHL Plus                      | 427     |

|     |                                                                                                                                                                                                         |                               | with Full Text                                                                                                 |         |
|-----|---------------------------------------------------------------------------------------------------------------------------------------------------------------------------------------------------------|-------------------------------|----------------------------------------------------------------------------------------------------------------|---------|
| S73 | (MH "Computer Communication Networks") OR (MH "Local Area Networks+") OR (MH "Wide Area Networks")                                                                                                      | Search modes - Boolean/Phrase | Interface - EBSCOhost Research Databases Search Screen - Advanced Search Database - CINAHL Plus with Full Text | 3,610   |
| S72 | S41 AND S71                                                                                                                                                                                             | Search modes - Boolean/Phrase | Interface - EBSCOhost Research Databases Search Screen - Advanced Search Database - CINAHL Plus with Full Text | 83,256  |
| S71 | S42 OR S43 OR S44 OR S45 OR S46 OR S47 OR S48 OR S49 OR S50 OR S51 OR S52 OR S53 OR S54 OR S55 OR S56 OR S57 OR S58 OR S59 OR S60 OR S61 OR S62 OR S63 OR S64 OR S65 OR S66 OR S67 OR S68 OR S69 OR S70 | Search modes - Boolean/Phrase | Interface - EBSCOhost Research Databases Search Screen - Advanced Search Database - CINAHL Plus with Full Text | 347,716 |
| S70 | T1 ( neuros?s N3 (trauma* or posttrauma* or post-trauma*) ) OR AB ( neuros?s N3 (trauma* or posttrauma* or post-trauma*) )                                                                              | Search modes - Boolean/Phrase | Interface - EBSCOhost Research Databases Search Screen - Advanced                                              | 13      |

|     |                                                                                                                                                                                            |                               |                                                                                                                |        |
|-----|--------------------------------------------------------------------------------------------------------------------------------------------------------------------------------------------|-------------------------------|----------------------------------------------------------------------------------------------------------------|--------|
|     |                                                                                                                                                                                            |                               | Search Database - CINAHL Plus with Full Text                                                                   |        |
| S69 | TI ( "stress disorder" or "stress disorders" ) N3 (trauma* or posttrauma* or post-trauma* ) OR AB ( "stress disorder" or "stress disorders" ) N3 (trauma* or posttrauma* or post-trauma* ) | Search modes - Boolean/Phrase | Interface - EBSCOhost Research Databases Search Screen - Advanced Search Database - CINAHL Plus with Full Text | 14,699 |
| S68 | TI PTSD OR AB PTSD                                                                                                                                                                         | Search modes - Boolean/Phrase | Interface - EBSCOhost Research Databases Search Screen - Advanced Search Database - CINAHL Plus with Full Text | 12,171 |
| S67 | TI ( MDD and mental ) OR AB ( MDD and mental )                                                                                                                                             | Search modes - Boolean/Phrase | Interface - EBSCOhost Research Databases Search Screen - Advanced Search Database - CINAHL Plus with Full Text | 710    |
| S66 | TI ( (feel* W0 blue) or blues ) OR AB ( (feel* W0 blue) or blues )                                                                                                                         | Search modes - Boolean/Phrase | Interface - EBSCOhost Research Databases                                                                       | 9,818  |

|     |                                                                                                              |                               |                                                                                                                |         |
|-----|--------------------------------------------------------------------------------------------------------------|-------------------------------|----------------------------------------------------------------------------------------------------------------|---------|
|     |                                                                                                              |                               | Search Screen - Advanced Search Database - CINAHL Plus with Full Text                                          |         |
| S65 | TI ( depress* or dysthym* or melanchol* ) OR AB ( depress* or dysthym* or melanchol* )                       | Search modes - Boolean/Phrase | Interface - EBSCOhost Research Databases Search Screen - Advanced Search Database - CINAHL Plus with Full Text | 158,485 |
| S64 | MH "Depression+"                                                                                             | Search modes - Boolean/Phrase | Interface - EBSCOhost Research Databases Search Screen - Advanced Search Database - CINAHL Plus with Full Text | 121,857 |
| S63 | TI ( hyperkinetic or "hyper-kinetic") W0 syndrome# ) OR AB ( hyperkinetic or "hyper-kinetic") W0 syndrome# ) | Search modes - Boolean/Phrase | Interface - EBSCOhost Research Databases Search Screen - Advanced Search Database - CINAHL Plus with Full Text | 20      |



|     |                                                                                                                                  |                               |                                                                                                                |        |
|-----|----------------------------------------------------------------------------------------------------------------------------------|-------------------------------|----------------------------------------------------------------------------------------------------------------|--------|
| S62 | TI ( ADDH or ADHD ) OR AB ( ADDH or ADHD )                                                                                       | Search modes - Boolean/Phrase | Interface - EBSCOhost Research Databases Search Screen - Advanced Search Database - CINAHL Plus with Full Text | 13,521 |
| S61 | TI ( "attention deficit" or "attention deficits" ) OR AB ( "attention deficit" or "attention deficits" )                         | Search modes - Boolean/Phrase | Interface - EBSCOhost Research Databases Search Screen - Advanced Search Database - CINAHL Plus with Full Text | 8,622  |
| S60 | MH "Attention Deficit Hyperactivity Disorder"                                                                                    | Search modes - Boolean/Phrase | Interface - EBSCOhost Research Databases Search Screen - Advanced Search Database - CINAHL Plus with Full Text | 17,669 |
| S59 | TI ( catastrophi?ation# or catastrophi?e* or catastrophi?ing ) OR AB ( catastrophi?ation# or catastrophi?e* or catastrophi?ing ) | Search modes - Boolean/Phrase | Interface - EBSCOhost Research Databases Search Screen - Advanced Search Database - CINAHL Plus                | 2,355  |

|     |                                                                                                                                                                                                                                                                                                                  |                               | with Full Text                                                                                                 |       |
|-----|------------------------------------------------------------------------------------------------------------------------------------------------------------------------------------------------------------------------------------------------------------------------------------------------------------------|-------------------------------|----------------------------------------------------------------------------------------------------------------|-------|
| S58 | TI ( phobia or phobias or phobic ) OR AB ( phobia or phobias or phobic )                                                                                                                                                                                                                                         | Search modes - Boolean/Phrase | Interface - EBSCOhost Research Databases Search Screen - Advanced Search Database - CINAHL Plus with Full Text | 3,144 |
| S57 | TI ( (panic W0 disorder*) or (panic N2 attack*) ) OR AB ( (panic W0 disorder*) or (panic N2 attack*) )                                                                                                                                                                                                           | Search modes - Boolean/Phrase | Interface - EBSCOhost Research Databases Search Screen - Advanced Search Database - CINAHL Plus with Full Text | 2,756 |
| S56 | TI ( "obsessive-compulsive" or (anankastic W0 personalit*) or (compulsive W0 personalit*) or (obsessive W0 personalit*) or hoarding or psychastheni* ) OR AB ( "obsessive-compulsive" or (anankastic W0 personalit*) or (compulsive W0 personalit*) or (obsessive W0 personalit*) or hoarding or psychastheni* ) | Search modes - Boolean/Phrase | Interface - EBSCOhost Research Databases Search Screen - Advanced Search Database - CINAHL Plus with Full Text | 5,730 |
| S55 | TI ( (neurotic W0 disorder*) or neuros?s or psychoneuros?s or psycho-neuros?s ) OR AB ( (neurotic W0 disorder*) or neuros?s or psychoneuros?s or psycho-neuros?s )                                                                                                                                               | Search modes - Boolean/Phrase | Interface - EBSCOhost Research Databases Search Screen - Advanced                                              | 629   |

|     |                                                                                                                                                                                                                                                                  |                               |                                                                                                                |        |
|-----|------------------------------------------------------------------------------------------------------------------------------------------------------------------------------------------------------------------------------------------------------------------|-------------------------------|----------------------------------------------------------------------------------------------------------------|--------|
|     |                                                                                                                                                                                                                                                                  |                               | Search Database - CINAHL Plus with Full Text                                                                   |        |
| S54 | TI ( (neurocirculatory W0 asthenia*) or (cardiac W0 neuros?s or (effort W0 syndrome*) or ("hyperkinetic heart" W0 syndrome*) ) OR AB ( (neurocirculatory W0 asthenia*) or (cardiac W0 neuros?s or (effort W0 syndrome*) or ("hyperkinetic heart" W0 syndrome*) ) | Search modes - Boolean/Phrase | Interface - EBSCOhost Research Databases Search Screen - Advanced Search Database - CINAHL Plus with Full Text | 15     |
| S53 | TI ( agoraphobi* or claustrophobi* or homophobi* or neophobi* or xenophobi* ) OR AB ( agoraphobi* or claustrophobi* or homophobi* or neophobi* or xenophobi* )                                                                                                   | Search modes - Boolean/Phrase | Interface - EBSCOhost Research Databases Search Screen - Advanced Search Database - CINAHL Plus with Full Text | 2,337  |
| S52 | TI ( (incessan* or obsessive* or persistan* or intense*) N3 fear* ) OR AB ( (incessan* or obsessive* or persistan* or intense*) N3 fear* )                                                                                                                       | Search modes - Boolean/Phrase | Interface - EBSCOhost Research Databases Search Screen - Advanced Search Database - CINAHL Plus with Full Text | 174    |
| S51 | TI ( hypervigilan* or hyper-vigilan* or nervous* ) OR AB ( hypervigilan* or hyper-vigilan* or nervous* )                                                                                                                                                         | Search modes - Boolean/Phrase | Interface - EBSCOhost Research Databases                                                                       | 30,051 |

|     |                                                                                    |                                  |                                                                                                                                                 |        |
|-----|------------------------------------------------------------------------------------|----------------------------------|-------------------------------------------------------------------------------------------------------------------------------------------------|--------|
|     |                                                                                    |                                  | Search<br>Screen -<br>Advanced<br>Search<br>Database -<br>CINAHL Plus<br>with Full<br>Text                                                      |        |
| S50 | TI GAD OR AB GAD                                                                   | Search modes -<br>Boolean/Phrase | Interface -<br>EBSCOhost<br>Research<br>Databases<br>Search<br>Screen -<br>Advanced<br>Search<br>Database -<br>CINAHL Plus<br>with Full<br>Text | 1,627  |
| S49 | TI ( anxiety or anxieties or anxious* ) OR AB ( anxiety or anxieties or anxious* ) | Search modes -<br>Boolean/Phrase | Interface -<br>EBSCOhost<br>Research<br>Databases<br>Search<br>Screen -<br>Advanced<br>Search<br>Database -<br>CINAHL Plus<br>with Full<br>Text | 87,663 |
| S48 | MH "Anxiety+"                                                                      | Search modes -<br>Boolean/Phrase | Interface -<br>EBSCOhost<br>Research<br>Databases<br>Search<br>Screen -<br>Advanced<br>Search<br>Database -<br>CINAHL Plus<br>with Full<br>Text | 49,349 |

|     |                                                                                                                                              |                               |                                                                                                                |        |
|-----|----------------------------------------------------------------------------------------------------------------------------------------------|-------------------------------|----------------------------------------------------------------------------------------------------------------|--------|
| S47 | MH "Anxiety Disorders+"                                                                                                                      | Search modes - Boolean/Phrase | Interface - EBSCOhost Research Databases Search Screen - Advanced Search Database - CINAHL Plus with Full Text | 49,095 |
| S46 | TI ( (cyclothymic or "cyclo-thymic") W0 (disorder# or personalit*) ) OR AB ( (cyclothymic or "cyclo-thymic") W0 (disorder# or personalit*) ) | Search modes - Boolean/Phrase | Interface - EBSCOhost Research Databases Search Screen - Advanced Search Database - CINAHL Plus with Full Text | 27     |
| S45 | MH "Cyclothymic Disorder"                                                                                                                    | Search modes - Boolean/Phrase | Interface - EBSCOhost Research Databases Search Screen - Advanced Search Database - CINAHL Plus with Full Text | 181    |
| S44 | TI ( (affective or mood) W0 disorder# ) OR AB ( (affective or mood) W0 disorder# )                                                           | Search modes - Boolean/Phrase | Interface - EBSCOhost Research Databases Search Screen - Advanced Search Database - CINAHL Plus                | 8,199  |

|     |                                                                                                                                                                                                                                                                                               |                               | with Full Text                                                                                                 |           |
|-----|-----------------------------------------------------------------------------------------------------------------------------------------------------------------------------------------------------------------------------------------------------------------------------------------------|-------------------------------|----------------------------------------------------------------------------------------------------------------|-----------|
| S43 | MH "Affective Disorders+"                                                                                                                                                                                                                                                                     | Search modes - Boolean/Phrase | Interface - EBSCOhost Research Databases Search Screen - Advanced Search Database - CINAHL Plus with Full Text | 128,800   |
| S42 | T1 ( (emotional* or mental* or psychological* or social*) N2 health* N3 (disorder* or morbidit* or comorbid* or co-morbidit* or problem*) )<br>OR AB ( (emotional* or mental* or psychological* or social*) N2 health* N3 (disorder* or morbidit* or comorbid* or co-morbidit* or problem*) ) | Search modes - Boolean/Phrase | Interface - EBSCOhost Research Databases Search Screen - Advanced Search Database - CINAHL Plus with Full Text | 18,400    |
| S41 | S3 OR S40                                                                                                                                                                                                                                                                                     | Search modes - Boolean/Phrase | Interface - EBSCOhost Research Databases Search Screen - Advanced Search Database - CINAHL Plus with Full Text | 1,920,672 |
| S40 | S4 OR S5 OR S6 OR S7 OR S8 OR S9 OR S10 OR S11 OR S12 OR S13 OR S14 OR S15 OR S16 OR S17 OR S18 OR S19 OR S20 OR S21 OR S22 OR S23 OR S24 OR S25 OR S26 OR S27 OR S28 OR S29 OR S30 OR S31 OR S32 OR S33 OR S34 OR S35 OR S36 OR S37 OR S38 OR S39                                            | Search modes - Boolean/Phrase | Interface - EBSCOhost Research Databases Search Screen - Advanced                                              | 1,836,239 |

|     |                                                                                                                                                                                        |                               |                                                                                                                |         |
|-----|----------------------------------------------------------------------------------------------------------------------------------------------------------------------------------------|-------------------------------|----------------------------------------------------------------------------------------------------------------|---------|
|     |                                                                                                                                                                                        |                               | Search Database - CINAHL Plus with Full Text                                                                   |         |
| S39 | TI ( (elevated or high*) N2 blood pressure* ) OR AB ( (elevated or high*) N2 blood pressure* )                                                                                         | Search modes - Boolean/Phrase | Interface - EBSCOhost Research Databases Search Screen - Advanced Search Database - CINAHL Plus with Full Text | 10,361  |
| S38 | TI hypertens* OR AB hypertens*                                                                                                                                                         | Search modes - Boolean/Phrase | Interface - EBSCOhost Research Databases Search Screen - Advanced Search Database - CINAHL Plus with Full Text | 93,958  |
| S37 | TI ( arterioscleros* or arterio-scleros* or atheroscleros* or athero-scleros* ) OR AB ( arterioscleros* or arterio-scleros* or atheroscleros* or athero-scleros* )                     | Search modes - Boolean/Phrase | Interface - EBSCOhost Research Databases Search Screen - Advanced Search Database - CINAHL Plus with Full Text | 18,802  |
| S36 | TI ( (artery or arteries or arterial or atrial* or atrium* or cardiac* or cardio* or cardiovascular* or cardio-vascul* or coronary or heart* or myocard* or ventricle*) N3 (arrest* or | Search modes - Boolean/Phrase | Interface - EBSCOhost Research Databases                                                                       | 291,187 |

|     |                                                                                                                                                                                                                                                                                                                                                                                                                                                                                                                                                                                                                                                                                                                                                 |                               |                                                                                                                |         |
|-----|-------------------------------------------------------------------------------------------------------------------------------------------------------------------------------------------------------------------------------------------------------------------------------------------------------------------------------------------------------------------------------------------------------------------------------------------------------------------------------------------------------------------------------------------------------------------------------------------------------------------------------------------------------------------------------------------------------------------------------------------------|-------------------------------|----------------------------------------------------------------------------------------------------------------|---------|
|     | aneurysm* or arrhythmia* or arrythmia* or disease* or disorder* or dysrhythmia* or dysrhythmia* or dysfunction* or failure* or fibrillation* or ischemi* or infarction* or obstruct* or occlu* or rupture* or stenosis or syndrom* or thrombo* or vasospas* or vasospas*) ) OR AB ( (artery or arteries or arterial or atrial* or atrium* or cardiac* or cardio* or cardiovascul* or cardio-vascul* or coronary or heart* or myocard* or ventricle*) N3 (arrest* or aneurysm* or arrhythmia* or arrythmia* or disease* or disorder* or dysrhythmia* or dysrhythmia* or dysfunction* or failure* or fibrillation* or ischemi* or infarction* or obstruct* or occlu* or rupture* or stenosis or syndrom* or thrombo* or vasospas* or vasospas*) ) |                               | Search Screen - Advanced Search Database - CINAHL Plus with Full Text                                          |         |
| S35 | MH "Cardiovascular Diseases+"                                                                                                                                                                                                                                                                                                                                                                                                                                                                                                                                                                                                                                                                                                                   | Search modes - Boolean/Phrase | Interface - EBSCOhost Research Databases Search Screen - Advanced Search Database - CINAHL Plus with Full Text | 616,463 |
| S34 | TI ( COPD or COAD ) OR AB ( COPD or COAD )                                                                                                                                                                                                                                                                                                                                                                                                                                                                                                                                                                                                                                                                                                      | Search modes - Boolean/Phrase | Interface - EBSCOhost Research Databases Search Screen - Advanced Search Database - CINAHL Plus with Full Text | 17,097  |
| S33 | TI ( emphysema# N3 (pulmonary or airway* or air way* or lung or lungs or airflow* or air flow* or centriacinar or "centri-acinar" or centrilobular or "centri-lobular" or panacinar or "pan-acinar" or panlobular or "pan-lobular") )                                                                                                                                                                                                                                                                                                                                                                                                                                                                                                           | Search modes - Boolean/Phrase | Interface - EBSCOhost Research Databases Search                                                                | 1,209   |



|     |                                                                                                                                                                                                                                                                                                                                              |                               |                                                                                                                |        |
|-----|----------------------------------------------------------------------------------------------------------------------------------------------------------------------------------------------------------------------------------------------------------------------------------------------------------------------------------------------|-------------------------------|----------------------------------------------------------------------------------------------------------------|--------|
|     | OR AB ( emphysema# N3 (pulmonary or airway* or air way* or lung or lungs or airflow* or air flow* or centriacinar or "centri-acinar" or centrilobular or "centri-lobular" or panacinar or "pan-acinar" or panlobular or "pan-lobular" ) )                                                                                                    |                               | Screen - Advanced Search Database - CINAHL Plus with Full Text                                                 |        |
| S32 | T1 ( chronic N2 obstructi* N3 (pulmonary or airway* or air way* or lung or lungs or airflow* or air flow* or bronchitis or bronchopulmonar* or broncho-pulmonar* ) ) OR AB ( chronic N2 obstructi* N3 (pulmonary or airway* or air way* or lung or lungs or airflow* or air flow* or bronchitis or bronchopulmonar* or broncho-pulmonar* ) ) | Search modes - Boolean/Phrase | Interface - EBSCOhost Research Databases Search Screen - Advanced Search Database - CINAHL Plus with Full Text | 17,432 |
| S31 | MH "Pulmonary Disease, Chronic Obstructive+"                                                                                                                                                                                                                                                                                                 | Search modes - Boolean/Phrase | Interface - EBSCOhost Research Databases Search Screen - Advanced Search Database - CINAHL Plus with Full Text | 21,169 |
| S30 | T1 "colitis gravis" OR AB "colitis gravis"                                                                                                                                                                                                                                                                                                   | Search modes - Boolean/Phrase | Interface - EBSCOhost Research Databases Search Screen - Advanced Search Database - CINAHL Plus with Full Text | 0      |

|     |                                                                                                                       |                               |                                                                                                                |    |
|-----|-----------------------------------------------------------------------------------------------------------------------|-------------------------------|----------------------------------------------------------------------------------------------------------------|----|
| S29 | T1 ( c(proctocolitis or "procto-colitis") N2 idiopathic ) OR AB ( (proctocolitis or "procto-colitis") N2 idiopathic ) | Search modes - Boolean/Phrase | Interface - EBSCOhost Research Databases Search Screen - Advanced Search Database - CINAHL Plus with Full Text | 0  |
| S28 | T1 ( (proctocolitis or "procto-colitis") N2 idiopathic ) OR AB ( (proctocolitis or "procto-colitis") N2 idiopathic )  | Search modes - Boolean/Phrase | Interface - EBSCOhost Research Databases Search Screen - Advanced Search Database - CINAHL Plus with Full Text | 0  |
| S27 | T1 ( Ileocolitis or "ileo-colitis" ) OR AB ( Ileocolitis or "ileo-colitis" )                                          | Search modes - Boolean/Phrase | Interface - EBSCOhost Research Databases Search Screen - Advanced Search Database - CINAHL Plus with Full Text | 27 |
| S26 | T1 ( ileitis N2 (regional or terminal) ) OR AB ( ileitis N2 (regional or terminal) )                                  | Search modes - Boolean/Phrase | Interface - EBSCOhost Research Databases Search Screen - Advanced Search Database - CINAHL Plus                | 38 |

|     |                                                                                  |                               | with Full Text                                                                                                 |        |
|-----|----------------------------------------------------------------------------------|-------------------------------|----------------------------------------------------------------------------------------------------------------|--------|
| S25 | TI ( Crohn or "Crohn's" ) OR AB ( Crohn or "Crohn's" )                           | Search modes - Boolean/Phrase | Interface - EBSCOhost Research Databases Search Screen - Advanced Search Database - CINAHL Plus with Full Text | 7,360  |
| S24 | TI IBD OR AB IBD                                                                 | Search modes - Boolean/Phrase | Interface - EBSCOhost Research Databases Search Screen - Advanced Search Database - CINAHL Plus with Full Text | 4,539  |
| S23 | TI ( inflam* N1 ( bowel* or colon* ) ) OR AB ( inflam* N1 ( bowel* or colon* ) ) | Search modes - Boolean/Phrase | Interface - EBSCOhost Research Databases Search Screen - Advanced Search Database - CINAHL Plus with Full Text | 9,032  |
| S22 | MH "Inflammatory Bowel Diseases+"                                                | Search modes - Boolean/Phrase | Interface - EBSCOhost Research Databases Search Screen - Advanced                                              | 15,541 |

|     |                                                                                                                                                                                                                                                                                                                                                                                                                                                                                                                                      |                               |                                                                                                                |        |
|-----|--------------------------------------------------------------------------------------------------------------------------------------------------------------------------------------------------------------------------------------------------------------------------------------------------------------------------------------------------------------------------------------------------------------------------------------------------------------------------------------------------------------------------------------|-------------------------------|----------------------------------------------------------------------------------------------------------------|--------|
|     |                                                                                                                                                                                                                                                                                                                                                                                                                                                                                                                                      |                               | Search Database - CINAHL Plus with Full Text                                                                   |        |
| S21 | TI ( dyslipidemi* or dyslipoproteinemi* or dyslipo-proteinemi* or hyperlipemi* or hyperlipid#emi* or hyper-lipemi* or hyper-lipid#emi* or lipemi* or lipid#emi* or hypercholester#emi* or hypercholester#emi* or hypertriglyceridemi* or hyper-triglyceridemi* ) OR AB ( dyslipidemi* or dyslipoproteinemi* or dyslipo-proteinemi* or hyperlipemi* or hyperlipid#emi* or hyper-lipemi* or hyper-lipid#emi* or lipemi* or lipid#emi* or hypercholester#emi* or hypercholester#emi* or hypertriglyceridemi* or hyper-triglyceridemi* ) | Search modes - Boolean/Phrase | Interface - EBSCOhost Research Databases Search Screen - Advanced Search Database - CINAHL Plus with Full Text | 15,450 |
| S20 | MH "Hyperlipidemia+"                                                                                                                                                                                                                                                                                                                                                                                                                                                                                                                 | Search modes - Boolean/Phrase | Interface - EBSCOhost Research Databases Search Screen - Advanced Search Database - CINAHL Plus with Full Text | 21,692 |
| S19 | TI ( IDDM or NIDDM ) OR AB ( IDDM or NIDDM )                                                                                                                                                                                                                                                                                                                                                                                                                                                                                         | Search modes - Boolean/Phrase | Interface - EBSCOhost Research Databases Search Screen - Advanced Search Database - CINAHL Plus with Full Text | 2,337  |
| S18 | TI ( ("Type 1" or "Type I" or "Type 2" or "Type II" or ID or NID) W0 DM ) ) OR AB ( ("Type 1" or                                                                                                                                                                                                                                                                                                                                                                                                                                     | Search modes - Boolean/Phrase | Interface - EBSCOhost Research                                                                                 | 1,064  |

|     |                                                                                                  |                               |                                                                                                                |         |
|-----|--------------------------------------------------------------------------------------------------|-------------------------------|----------------------------------------------------------------------------------------------------------------|---------|
|     | "Type I" or "Type 2" or "Type II" or ID or NID) W0 DM ) )                                        |                               | Databases Search Screen - Advanced Search Database - CINAHL Plus with Full Text                                |         |
| S17 | TI diabet* OR AB diabet*                                                                         | Search modes - Boolean/Phrase | Interface - EBSCOhost Research Databases Search Screen - Advanced Search Database - CINAHL Plus with Full Text | 207,171 |
| S16 | (MH "Diabetes Mellitus") OR (MH "Diabetes Mellitus, Type 1") OR (MH "Diabetes Mellitus, Type 2") | Search modes - Boolean/Phrase | Interface - EBSCOhost Research Databases Search Screen - Advanced Search Database - CINAHL Plus with Full Text | 148,760 |
| S15 | TI ( CKD or CKDs ) OR AB ( CKD or CKDs )                                                         | Search modes - Boolean/Phrase | Interface - EBSCOhost Research Databases Search Screen - Advanced Search Database - CINAHL Plus with Full Text | 9,008   |

|     |                                                                                                                                                                                                                                                                                                                                                                                                                                                                                                                                                              |                               |                                                                                                                |         |
|-----|--------------------------------------------------------------------------------------------------------------------------------------------------------------------------------------------------------------------------------------------------------------------------------------------------------------------------------------------------------------------------------------------------------------------------------------------------------------------------------------------------------------------------------------------------------------|-------------------------------|----------------------------------------------------------------------------------------------------------------|---------|
| S14 | TI ( chronic N2 (renal or kidney*) N3 (condition* or disease* or disorder* or fail* or insufficien*) ) OR AB ( chronic N2 (renal or kidney*) N3 (condition* or disease* or disorder* or fail* or insufficien*) )                                                                                                                                                                                                                                                                                                                                             | Search modes - Boolean/Phrase | Interface - EBSCOhost Research Databases Search Screen - Advanced Search Database - CINAHL Plus with Full Text | 20,525  |
| S13 | MH "Renal Insufficiency, Chronic+"                                                                                                                                                                                                                                                                                                                                                                                                                                                                                                                           | Search modes - Boolean/Phrase | Interface - EBSCOhost Research Databases Search Screen - Advanced Search Database - CINAHL Plus with Full Text | 28,632  |
| S12 | TI ( adenoma* or adenocarcinoma* or adenocarcinoma* or blastoma* or carcinosarcoma* or carcino-sarcoma* or hematoma* or hepatoblastoma* or hepato-blastoma* or leukemia* or leukaemia* or lymphoma* or melanoma* or mesenchymoma* or mesothelioma* or sarcoma* or thymoma* ) OR AB ( adenoma* or adenocarcinoma* or adenocarcinoma* or blastoma* or carcinosarcoma* or carcino-sarcoma* or hematoma* or hepatoblastoma* or hepato-blastoma* or leukemia* or leukaemia* or lymphoma* or melanoma* or mesenchymoma* or mesothelioma* or sarcoma* or thymoma* ) | Search modes - Boolean/Phrase | Interface - EBSCOhost Research Databases Search Screen - Advanced Search Database - CINAHL Plus with Full Text | 56,415  |
| S11 | TI ( neoplas* or cancer* or tumour* or tumor* or carcinoma* or malignan* or metasta* or oncolog* ) OR AB ( neoplas* or cancer* or tumour* or tumor* or carcinoma* or malignan* or metasta* or oncolog* )                                                                                                                                                                                                                                                                                                                                                     | Search modes - Boolean/Phrase | Interface - EBSCOhost Research Databases Search Screen - Advanced Search                                       | 601,907 |

|     |                                                                                                                                                                                                                                                                                                                                                                                                                                                                                                                                                                                                                                                                                                                                                                                                                    |                               |                                                                                                                |         |
|-----|--------------------------------------------------------------------------------------------------------------------------------------------------------------------------------------------------------------------------------------------------------------------------------------------------------------------------------------------------------------------------------------------------------------------------------------------------------------------------------------------------------------------------------------------------------------------------------------------------------------------------------------------------------------------------------------------------------------------------------------------------------------------------------------------------------------------|-------------------------------|----------------------------------------------------------------------------------------------------------------|---------|
|     |                                                                                                                                                                                                                                                                                                                                                                                                                                                                                                                                                                                                                                                                                                                                                                                                                    |                               | Database - CINAHL Plus with Full Text                                                                          |         |
| S10 | MH "Neoplasms+"                                                                                                                                                                                                                                                                                                                                                                                                                                                                                                                                                                                                                                                                                                                                                                                                    | Search modes - Boolean/Phrase | Interface - EBSCOhost Research Databases Search Screen - Advanced Search Database - CINAHL Plus with Full Text | 571,926 |
| S9  | TI ( (chronic* or constant* or continual* or continuous* or ceaseless* or endless* or incessant* or interminabl* or intractable or longterm or "long-term" or nonstop* or non-stop* or perpetual* or persist* or recur* or refractory or sustained or relentless* or unabat* or unceasing or unending or uninterupt* or unrelenting or unrelieved or unremitt*) N3 (neuralgi* or neuropath* or pain*) ) OR AB ( (chronic* or constant* or continual* or continuous* or ceaseless* or endless* or incessant* or interminabl* or intractable or longterm or "long-term" or nonstop* or non-stop* or perpetual* or persist* or recur* or refractory or sustained or relentless* or unabat* or unceasing or unending or uninterupt* or unrelenting or unrelieved or unremitt*) N3 (neuralgi* or neuropath* or pain*) ) | Search modes - Boolean/Phrase | Interface - EBSCOhost Research Databases Search Screen - Advanced Search Database - CINAHL Plus with Full Text | 46,734  |
| S8  | (MH "Chronic Pain")                                                                                                                                                                                                                                                                                                                                                                                                                                                                                                                                                                                                                                                                                                                                                                                                | Search modes - Boolean/Phrase | Interface - EBSCOhost Research Databases Search Screen - Advanced Search Database - CINAHL Plus                | 23,373  |

|    |                                                                                                                                                                                                                                                                                                                                                                            |                               | with Full Text                                                                                                 |        |
|----|----------------------------------------------------------------------------------------------------------------------------------------------------------------------------------------------------------------------------------------------------------------------------------------------------------------------------------------------------------------------------|-------------------------------|----------------------------------------------------------------------------------------------------------------|--------|
| S7 | TI asthma* OR AB asthma*                                                                                                                                                                                                                                                                                                                                                   | Search modes - Boolean/Phrase | Interface - EBSCOhost Research Databases Search Screen - Advanced Search Database - CINAHL Plus with Full Text | 39,408 |
| S6 | (MH "Asthma+")                                                                                                                                                                                                                                                                                                                                                             | Search modes - Boolean/Phrase | Interface - EBSCOhost Research Databases Search Screen - Advanced Search Database - CINAHL Plus with Full Text | 36,911 |
| S5 | TI ( arthriti* or arthros?s or osteoarthriti* or osteo-arthriti* or osteoarthros?s or osteo-arthros?s or polyarthriti* or poly-arthriti* or spondylarthriti* or spondyl-arthriti* ) OR AB ( arthriti* or arthros?s or osteoarthriti* or osteo-arthriti* or osteoarthros?s or osteo-arthros?s or polyarthriti* or poly-arthriti* or spondylarthriti* or spondyl-arthriti* ) | Search modes - Boolean/Phrase | Interface - EBSCOhost Research Databases Search Screen - Advanced Search Database - CINAHL Plus with Full Text | 72,634 |
| S4 | (MH "Arthritis+")                                                                                                                                                                                                                                                                                                                                                          | Search modes - Boolean/Phrase | Interface - EBSCOhost Research Databases Search Screen - Advanced                                              | 78,840 |



|    |                                                                                                                                                                                                                                                                                                                                                                                                                                                                                                                   |                               |                                                                                                                |         |
|----|-------------------------------------------------------------------------------------------------------------------------------------------------------------------------------------------------------------------------------------------------------------------------------------------------------------------------------------------------------------------------------------------------------------------------------------------------------------------------------------------------------------------|-------------------------------|----------------------------------------------------------------------------------------------------------------|---------|
|    |                                                                                                                                                                                                                                                                                                                                                                                                                                                                                                                   |                               | Search Database - CINAHL Plus with Full Text                                                                   |         |
| S3 | S1 OR S2                                                                                                                                                                                                                                                                                                                                                                                                                                                                                                          | Search modes - Boolean/Phrase | Interface - EBSCOhost Research Databases Search Screen - Advanced Search Database - CINAHL Plus with Full Text | 180,624 |
| S2 | T1 ( chronic* or longterm or "long-term" or longstanding or "long-standing" or ongoing or persisten*) N2 (comorbid* or (co W0 morbid*) or condition* or disabilit* or disease* or disorder* or ill or illness* or morbidit* or syndrom* or symptom*) ) OR AB ( (chronic* or longterm or "long-term" or longstanding or "long-standing" or ongoing or persisten*) N2 (comorbid* or (co W0 morbid*) or condition* or disabilit* or disease* or disorder* or ill or illness* or morbidit* or syndrom* or symptom*) ) | Search modes - Boolean/Phrase | Interface - EBSCOhost Research Databases Search Screen - Advanced Search Database - CINAHL Plus with Full Text | 138,197 |
| S1 | (MH "Chronic Disease+")                                                                                                                                                                                                                                                                                                                                                                                                                                                                                           | Search modes - Boolean/Phrase | Interface - EBSCOhost Research Databases Search Screen - Advanced Search Database - CINAHL Plus with Full Text | 68,313  |

Web of Science

# 30 [500](#) #28 AND #24

- Refined by: PUBLICATION YEARS:** ( 2020 OR 2014 OR 2019 OR 2013 OR 2018 OR 2012 OR 2017 OR 2011 OR 2016 OR 2010 OR 2015 )  
Indexes=SCI-EXPANDED, SSCI, A&HCI, CPCI-S, CPCI-SSH, BKCI-S, BKCI-SSH, ESCI  
Timespan=All years
- # 29 [563](#) #28 AND #24  
Indexes=SCI-EXPANDED, SSCI, A&HCI, CPCI-S, CPCI-SSH, BKCI-S, BKCI-SSH, ESCI  
Timespan=All years
- # 28 [555,169](#) #27 OR #26 OR #25  
Indexes=SCI-EXPANDED, SSCI, A&HCI, CPCI-S, CPCI-SSH, BKCI-S, BKCI-SSH, ESCI  
Timespan=All years
- # 27 [16,091](#) TS=("network MA" or "network MAs") OR TS=(NMA or NMAs or MTC or MTCs or MAIC or MAICs) OR TS=(indirect\* NEAR/0 compar\*) OR TS=("indirect treatment" or "indirect treatments") NEAR/1 compar\*) OR TS=("mixed treatment" or "mixed treatments") NEAR/1 compar\*) OR TS=("multiple treatment" or "multiple treatments") NEAR/1 compar\*) OR TS=("multi treatment" or "multi treatments") NEAR/1 compar\*) OR TS=(simultaneous\* NEAR/0 compar\*) OR TS=(mixed NEAR/0 comparison\*)  
Indexes=SCI-EXPANDED, SSCI, A&HCI, CPCI-S, CPCI-SSH, BKCI-S, BKCI-SSH, ESCI  
Timespan=All years
- # 26 [15,279](#) **TOPIC:** ("meta-review" or "meta-reviews" or "meta-overview" or "meta-overviews" or (meta NEAR/0 syntheses\*)) OR **TOPIC:** ("rapid review" or "rapid reviews" or "review of reviews" or "umbrella review" or "umbrella reviews" or "technology assessment" or "technology assessments" or HTA or HTAs)  
Indexes=SCI-EXPANDED, SSCI, A&HCI, CPCI-S, CPCI-SSH, BKCI-S, BKCI-SSH, ESCI  
Timespan=All years
- # 25 [530,270](#) **TOPIC:** ((meta NEAR/0 analy\* or metanaly\* or metaanaly\* or (met NEAR/0 analy\*)) OR **TOPIC:** (integrative NEAR/0 (research or review\* or overview\*)) OR **TOPIC:** (research NEAR/0 (integration or overview\*)) OR **TOPIC:** (collaborative NEAR/0 review\*) OR **TOPIC:** ("systematic review" or "systematic reviews" or "systematic overview" or "systematic overviews") OR **TOPIC:** ("evidence-based review" or "evidence-based reviews" or "evidence-based overview" or "evidence-based overviews") OR **TOPIC:** (evidence NEAR/3 (review\* or overview\*))  
Indexes=SCI-EXPANDED, SSCI, A&HCI, CPCI-S, CPCI-SSH, BKCI-S, BKCI-SSH, ESCI  
Timespan=All years
- # 24 [5,800](#) #23 AND #16  
Indexes=SCI-EXPANDED, SSCI, A&HCI, CPCI-S, CPCI-SSH, BKCI-S, BKCI-SSH, ESCI  
Timespan=All years
- # 23 [688,715](#) #22 OR #21 OR #20 OR #19 OR #18 OR #17  
Indexes=SCI-EXPANDED, SSCI, A&HCI, CPCI-S, CPCI-SSH, BKCI-S, BKCI-SSH, ESCI  
Timespan=All years
- # 22 [64,468](#) **TOPIC:** (ehealth or "e-health" or mhealth or "m-health" or "mobile health") OR **TOPIC:** (telecare or "tele-care" or teleconsult\* or (tele NEAR/0 consult\*) or telecounsel\* or (tele NEAR/0 counsel\*) or telehome\* or (tele NEAR/0 home\*) or telemed\* or (tele NEAR/0 med\*) or telemonitor\* or (tele NEAR/0

- monitor\*) or telenurs\* or (tele NEAR/0 nurs\*) or telepsychiatr\* or (tele NEAR/0 psychiatr\*) or telerehab\* or (tele NEAR/0 rehab\*) ) OR **TOPIC:** (remote\* NEAR/3 (care or healthcare or "health care" or consult\* or counsel\* or interven\* or monitor\* or psychiatr\* or rehab\* or treat\* or therap\*) )  
Indexes=SCI-EXPANDED, SSCI, A&HCI, CPCI-S, CPCI-SSH, BKCI-S, BKCI-SSH, ESCI  
Timespan=All years
- # 21 [92,415](#) **TOPIC:** ("electronic health record" or "electronic health records") OR **TOPIC:** (EHR or EHRs or EMR or EMRs or PHR or PHRs) OR **TOPIC:** (hotline or hotlines) OR **TOPIC:** (telecommunicat\* or (tele NEAR/0 communicat\*)) )  
Indexes=SCI-EXPANDED, SSCI, A&HCI, CPCI-S, CPCI-SSH, BKCI-S, BKCI-SSH, ESCI  
Timespan=All years
- # 20 [357,584](#) **TOPIC:** ((electronic NEAR/0 mail\*) or email\* or "e-mail" or "e-mails" or "e-mailed" or "e-mailing") OR **TOPIC:** (telephon\* or (tele NEAR/0 phon\*) or phone or phoned or phones or phoning or "answering service" or "answering services" or telefacsimile\* or (tele NEAR/0 facsimile) or "tele-facsimiles" or FAX) OR **TOPIC:** (televis\* or (tele NEAR/0 vis\*) or TV or TVs or videorecord\* or (video NEAR/0 record\*) or videotap\* or (video NEAR/0 tap\*)) ) OR **TOPIC:** (videoconferenc\* or (video NEAR/0 conferenc\*) or videophon\* or (video NEAR/0 phon\*)) )  
Indexes=SCI-EXPANDED, SSCI, A&HCI, CPCI-S, CPCI-SSH, BKCI-S, BKCI-SSH, ESCI  
Timespan=All years
- # 19 [5,843](#) **TOPIC:** (patient\* NEAR/2 (portal or portals) ) OR **TOPIC:** (("health information" or "medical information" or "clinical information") NEAR/3 (portal or portals) ) OR **TOPIC:** (("health data" or "medical data" or "clinical data") NEAR/3 (portal or portals) ) OR **TOPIC:** ("health portal" or "health portals")  
Indexes=SCI-EXPANDED, SSCI, A&HCI, CPCI-S, CPCI-SSH, BKCI-S, BKCI-SSH, ESCI  
Timespan=All years
- # 18 [31,855](#) **TOPIC:** (digital\* NEAR/3 (care or healthcare or "health care" or interven\* or consult\* or counsel\* or monitor\* or psychiatr\* or rehab\* or treat\* or therap\*)) OR **TOPIC:** (("technology-based" or "technology-facilitated") NEAR/3 (care or healthcare or "health care" or interven\* or consult\* or counsel\* or monitor\* or psychiatr\* or rehab\* or treat\* or therap\*)) ) OR **TOPIC:** (video\* NEAR/3 (care or healthcare or "health care" or interven\* or consult\* or counsel\* or monitor\* or psychiatr\* or rehab\* or treat\* or therap\*)) ) OR **TOPIC:** (virtual\* NEAR/3 (care or healthcare or "health care" or interven\* or consult\* or counsel\* or monitor\* or psychiatr\* or rehab\* or treat\* or therap\*)) )  
Indexes=SCI-EXPANDED, SSCI, A&HCI, CPCI-S, CPCI-SSH, BKCI-S, BKCI-SSH, ESCI  
Timespan=All years
- # 17 [190,766](#) **TOPIC:** ((internet\* or online or web or "web-based" or "web-site" or website or www or cyber\* or smartphone\* or "smart phone" or "smart phones" or iphone\* or "i-phone" or "i-phones" or ipad or "i-pad" or ipads or "i-pads") NEAR/3 (care or deliver\* or healthcare or "health care" or consult\* or counsel\* or interven\* or monitor\* or psychiatr\* or rehab\* or service or services or treat\* or therap\*)) ) OR **TOPIC:** ((internet\* or online or web or "web-based" or "web-site" or website or www or cyber\* or smartphone\* or "smart phone" or "smart phones" or iphone\* or "i-phone" or "i-phones" or ipad or "i-pad" or ipads or "i-pads") NEAR/3 (app

- or apps or application or applications) ) **OR TOPIC:** (mobile NEAR/3 (app or apps or application or applications) )  
 Indexes=SCI-EXPANDED, SSCI, A&HCI, CPCI-S, CPCI-SSH, BKCI-S, BKCI-SSH, ESCI  
 Timespan=All years
- # 16 [283,795](#) #15 AND #9  
 Indexes=SCI-EXPANDED, SSCI, A&HCI, CPCI-S, CPCI-SSH, BKCI-S, BKCI-SSH, ESCI  
 Timespan=All years
- # 15 [1,677,770](#) #14 OR #13 OR #12 OR #11 OR #10  
 Indexes=SCI-EXPANDED, SSCI, A&HCI, CPCI-S, CPCI-SSH, BKCI-S, BKCI-SSH, ESCI  
 Timespan=All years
- # 14 [94,945](#) **TOPIC:** (PTSD) **OR TOPIC:** (ADDH or ADHD) **OR TOPIC:** ("stress disorder" NEAR/3 (trauma\* or posttrauma\* or post-trauma\*)) **OR TOPIC:** ("stress disorders" NEAR/3 (trauma\* or posttrauma\* or post-trauma\*)) **OR TOPIC:** (neurosis NEAR/3 (trauma\* or posttrauma\* or post-trauma\*)) **OR TOPIC:** (neuroses NEAR/3 (trauma\* or posttrauma\* or post-trauma\*))  
 Indexes=SCI-EXPANDED, SSCI, A&HCI, CPCI-S, CPCI-SSH, BKCI-S, BKCI-SSH, ESCI  
 Timespan=All years
- # 13 [1,032,053](#) **TOPIC:** ("attention deficit" or "attention deficits") **OR TOPIC:** (ADDH or ADHD) **OR TOPIC:** ((hyperkinetic or "hyperkinetic") NEAR/0 syndrome\*) **OR TOPIC:** (depress\*) **OR TOPIC:** (dysthym\*) **OR TOPIC:** ((feel\* NEAR/0 blue) or blues) **OR TOPIC:** (melanchol\*) **OR TOPIC:** (MDD and mental)  
 Indexes=SCI-EXPANDED, SSCI, A&HCI, CPCI-S, CPCI-SSH, BKCI-S, BKCI-SSH, ESCI  
 Timespan=All years
- # 12 [73,711](#) TS=((neurocirculatory NEAR/0 asthenia\*) or "cardiac neurosis" or "cardiac neuroses" or (effort NEAR/0 syndrome\*) or ("hyperkinetic heart" NEAR/0 syndrome\*)) **OR TS=**("neurotic disorder" or "neurotic disorders" or neurosis or neuroses or psychoneurosis or psychoneuroses or "psycho-neurosis" or "psycho-neuroses") **OR TS=**("obsessive-compulsive" or (anankastic NEAR/0 personalit\*) or (compulsive NEAR/0 personalit\*) or (obsessive NEAR/0 personalit\*) or hoarding or psychastheni\*) **OR TS=**(panic NEAR/2 (disorder\* or attack\*)) **OR TS=**(phobia or phobias or phobic) **OR TS=**(catastrophisation\* or catastrophise\* or catastrophising or catastrophization\* or catastrophize\* or catastrophizing)  
 Indexes=SCI-EXPANDED, SSCI, A&HCI, CPCI-S, CPCI-SSH, BKCI-S, BKCI-SSH, ESCI  
 Timespan=All years
- # 11 [741,658](#) **TOPIC:** ((affective or mood) NEAR/0 disorder\*) **OR TOPIC:** ((cyclothymic or "cyclothymic") NEAR/0 (disorder\* or personalit\*)) **OR TOPIC:** (anxiety or anxieties or anxious\*) **OR TOPIC:** (GAD) **OR TOPIC:** (hypervigilan\* or (hyper NEAR/0 vigilan\*) or nervous\*) **OR TOPIC:** ((incessan\* or obsessive\* or persistan\* or intense\*) NEAR/3 fear\*) **OR TOPIC:** (agoraphobi\* or claustrophobi\* or homophobi\* or neophobi\* or xenophobi\*)  
 Indexes=SCI-EXPANDED, SSCI, A&HCI, CPCI-S, CPCI-SSH, BKCI-S, BKCI-SSH, ESCI  
 Timespan=All years

- # 10 [29,399](#) **TOPIC:** ((emotional\* or mental\* or psychological\* or social\*) NEAR/2 health\* NEAR/3 (disorder\* or morbidit\* or comorbid\* or "co-morbidity" or "co-morbidities" or problem\*))  
Indexes=SCI-EXPANDED, SSCI, A&HCI, CPCI-S, CPCI-SSH, BKCI-S, BKCI-SSH, ESCI  
Timespan=All years
- # 9 [7,741,298](#) #8 OR #7 OR #6 OR #5 OR #4 OR #3 OR #2 OR #1  
Indexes=SCI-EXPANDED, SSCI, A&HCI, CPCI-S, CPCI-SSH, BKCI-S, BKCI-SSH, ESCI  
Timespan=All years
- # 8 [710,621](#) **TOPIC:** (arterioscleros\* or arterio-scleros\* or atheroscleros\* or atheroscleros\*) OR **TOPIC:** (hypertens\*) OR **TOPIC:** ((elevated or high\*) NEAR/2 "blood pressure") OR **TOPIC:** ((elevated or high\*) NEAR/2 "blood pressures")  
Indexes=SCI-EXPANDED, SSCI, A&HCI, CPCI-S, CPCI-SSH, BKCI-S, BKCI-SSH, ESCI  
Timespan=All years
- # 7 [1,370,786](#) **TOPIC:** ((artery or arteries or arterial or atrial\* or atrium\* or cardiac\* or cardio\* or cardiovascular\* or "cardio-vascular" or coronary or heart\* or myocard\* or ventricle\*) NEAR/3 (arrest\* or aneurysm\* or arrhythmia\* or arrhythmia\* or disease\* or disorder\* or dysrhythmia\* or dysrhythmia\* or dysfunction\* or failure\* or fibrillation\* or ischemi\* or infarction\* or obstruct\* or occlu\* or rupture\* or stenosis or stenoses or syndrom\* or thrombo\* or vasospas\* or "vaso-spasm" or "vaso-spasms"))  
Indexes=SCI-EXPANDED, SSCI, A&HCI, CPCI-S, CPCI-SSH, BKCI-S, BKCI-SSH, ESCI  
Timespan=All years
- # 6 [71,527](#) **TOPIC:** (emphysema NEAR/3 (pulmonary or airway\* or "air way" or "air ways" or lung or lungs or airflow\* or "air flow" or "air flows" or bronchitis or bronchopulmonar\* or "broncho-pulmonary")) OR **TOPIC:** (COAD or COPD)  
Indexes=SCI-EXPANDED, SSCI, A&HCI, CPCI-S, CPCI-SSH, BKCI-S, BKCI-SSH, ESCI  
Timespan=All years
- # 5 [54,369](#) **TOPIC:** ("chronic obstructive" NEAR/3 (pulmonary or airway\* or "air way" or "air ways" or lung or lungs or airflow\* or "air flow" or "air flows" or bronchitis or bronchopulmonar\* or "broncho-pulmonary"))  
Indexes=SCI-EXPANDED, SSCI, A&HCI, CPCI-S, CPCI-SSH, BKCI-S, BKCI-SSH, ESCI  
Timespan=All years
- # 4 [200,828](#) TS=(dyslipidemi\* or dyslipoproteinemi\* or dyslipoproteinemi\* or hyperlipemi\* or hyperlipidaemi\* or hyperlipidemi\* or hyperlipemi\* or hyper-lipidaemi\* or hyperlipidemi\* or lipemi\* or lipidaemi\* or lipidemi\* or hypercholesterami\* or hypercholesteremi\* or hyper-cholesterami\* or hypercholesteremi\* or hypertriglyceridemi\* or hyper-triglyceridemi\*) OR TS=(inflam\* NEAR/1 (bowel\* or colon\*)) OR TS=(IBD) OR TS=(Crohn or "Crohn's") OR TS=(ileitis NEAR/2 (regional or terminal)) OR TS=(Ileocolitis or "ileo-colitis") OR TS=((proctocolitis or proctocolitis) NEAR/2 idiopathic) OR TS=((colorectitis or proctocolitis or proctocolitis) NEAR/2 (ulcer\* or mucosal)) OR TS=("colitis gravis")  
Indexes=SCI-EXPANDED, SSCI, A&HCI, CPCI-S, CPCI-SSH, BKCI-S, BKCI-SSH, ESCI  
Timespan=All years

- # 3 [867,623](#) **TOPIC:** ((chronic NEAR/2 (renal or kidney\*) NEAR/3 (condition\* or disease\* or disorder\* or fail\* or insufficien\*)) ) OR **TOPIC:** (CKD or CKDs) OR **TOPIC:** (diabet\*) OR **TOPIC:** ("Type 1" or "Type I" or "Type 2" or "Type II" or ID or NID) NEAR/0 DM) OR **TOPIC:** (IDDM or NIDDM)  
Indexes=SCI-EXPANDED, SSCI, A&HCI, CPCI-S, CPCI-SSH, BKCI-S, BKCI-SSH, ESCI  
Timespan=All years
- # 2 [4,527,936](#) **TOPIC:** (neoplas\* or cancer\* or tumour\* or tumor\* or carcinoma\* or malignan\* or metasta\* or oncolog\*) OR **TOPIC:** (adenoma\* or adenocarcinoma\* or adeno-carcinoma\* or blastoma\* or carcinosarcoma\* or carcino-sarcoma\* or hematoma\* or hepatoblastoma\* or hepato-blastoma\* or leukemia\* or leukaemia\* or lymphoma\* or melanoma\* or mesenchymoma\* or mesothelioma\* or sarcoma\* or thymoma\*)  
Indexes=SCI-EXPANDED, SSCI, A&HCI, CPCI-S, CPCI-SSH, BKCI-S, BKCI-SSH, ESCI  
Timespan=All years
- # 1 [1,063,650](#) **TOPIC:** ((chronic\* or longterm or "long-term" or longstanding or "long-standing" or ongoing or persisten\*) NEAR/2 (comorbid\* or co-morbid\* or condition\* or disabilit\* or disease\* or disorder\* or ill or illness\* or morbidit\* or syndrom\* or symptom\*) ) OR **TOPIC:** (arthriti\* or arthrosis or arthroses or osteoarthritis\* or osteoarthriti\* or osteoarthros\* or osteo-arthros\* or polyarthriti\* or poly-arthritis\* or spondylarthriti\* or spondyl-arthritis\*) OR **TOPIC:** (asthma\*) OR **TOPIC:** ((chronic\* or constant\* or continual\* or continuous\* or ceaseless\* or endless\* or incessant\* or interminabl\* or intractable or longterm or "long-term" or nonstop\* or "non-stop" or perpetual\* or persist\* or recur\* or refractory or sustained or relentless\* or unabat\* or unceasing or unending or uninterrupt\* or unrelenting or unrelieved or unremitt\*) NEAR/3 (neuralgi\* or neuropath\* or pain\*) )  
Indexes=SCI-EXPANDED, SSCI, A&HCI, CPCI-S, CPCI-SSH, BKCI-S, BKCI-SSH, ESCI  
Timespan=All years
